# Supplementary material for: Extensive heterogeneity of glycopeptides in plasma revealed by deep glycoproteomic analysis using size-exclusion chromatography
Source: Royal Society of Chemistry journal article supplement (doi:10.1039/d1mo00132a), 2021-08-04
Supplement: d1mo00132a1.xlsx [file d1mo00132a1.xlsx]

## Sheet: Supplementary Table 1
Extensive heterogeneity of glycopeptides in plasma revealed by deep glycoproteomic analysis using size-exclusion chromatography
Supplementary Table 1: Size-exclusion chromtography based enrichement of glycopeptides was perfromed and data was searched with tryptic cleavage specificity. Peptide sequence is provided in the column A, where J is the Aspragine on which the glycan was localized. Column B provides the composition of the glycan at the glycosylation site, where H, N, A, G, F are in sequence and H=Hexose, N=HexNAc, …
Peptide sequence	Glycan composition (H,N,A,G,F)	Plausible Structure	Proteins (Uniprot accession and Id)	Glycosyaltion Site
NEEYJK	6 5 2 0 1	(N(N(H(H(N(H)(F)))(H(N(H(A)))(N(H(A)))))))	sp|P02763|A1AG1_HUMAN/sp|P19652|A1AG2_HUMAN	56/56
VSJQTLSLFFTVLQDVPVR	6 5 1 0 0	(N(N(H(H(N(H(A))))(H(N(H))(N(H))))))	sp|P01023|A2MG_HUMAN	1424
EJLTAPGSDSAVFFEQGTTR	6 5 3 0 0	(N(N(H(H(N(H(A))))(H(N(H(A)))(N(H(A)))))))	sp|P00450|CERU_HUMAN	397
GCVLLSYLJETVTVSASLESVR	5 4 1 0 0	(N(N(H(H(N(H)))(H(N(H(A)))))))	sp|P01023|A2MG_HUMAN	55
SLGNVJFTVSAEALESQELCGTEVPSVPEHGRK	5 4 1 0 0	(N(N(H(H(N(H)))(H(N(H(A)))))))	sp|P01023|A2MG_HUMAN	869
PALEDLLLGSEAJLTCTLTGLR	5 4 1 0 0	(N(N(H(H(N(H)))(H(N(H(A)))))))	sp|P01876|IGHA1_HUMAN/sp|P0DOX2|IGA2_HUMAN/sp|P01877|IGHA2_HUMAN	144/246/131
QJQCFYJSSYLNVQR	7 6 3 0 0	(N(N(H(H(N(H))(N(H(A))))(H(N(H(A)))(N(H(A)))))))	sp|P19652|A1AG2_HUMAN	88
SQILEGLGFJLTELSESDVHR	6 5 3 0 0	(N(N(H(H(N(H(A))))(H(N(H(A)))(N(H(A)))))))	sp|P29622|KAIN_HUMAN	108
ALPQPQJVTSLLGCTH	5 4 2 0 0	(N(N(H(H(N(H(A))))(H(N(H(A)))))))	sp|P02790|HEMO_HUMAN	453
SVQEIQATFFYFTPJKTEDTIFLR	6 5 3 0 0	(N(N(H(H(N(H(A))))(H(N(H(A)))(N(H(A)))))))	sp|P02763|A1AG1_HUMAN/sp|P19652|A1AG2_HUMAN	72/72
ADTHDEILEGLNFJLTEIPEAQIHEGFQELLR	6 5 3 0 0	(N(N(H(H(N(H(A))))(H(N(H(A)))(N(H(A)))))))	sp|P01009|A1AT_HUMAN	107
QDQCIYJTTYLNVQR	6 5 2 0 0	(N(N(H(H(N(H(A))))(H(N(H))(N(H(A)))))))	sp|P02763|A1AG1_HUMAN	93
QLAHQSJSTNIFFSPVSIATAFAMLSLGTK	5 4 2 0 0	(N(N(H(H(N(H(A))))(H(N(H(A)))))))	sp|P01009|A1AT_HUMAN	70
ISEEJETTCYMGK	5 4 2 0 0	(N(N(H(H(N(H(A))))(H(N(H(A)))))))	sp|P08603|CFAH_HUMAN	911
MVSHHJLTTGATLINEQWLLTTAK	6 5 3 0 0	(N(N(H(H(N(H(A))))(H(N(H(A)))(N(H(A)))))))	sp|P00739|HPTR_HUMAN/sp|P00738|HPT_HUMAN	126/184
GCVLLSYLJETVTVSASLESVR	5 4 2 0 1	(N(F)(N(H(H(N(H(A))))(H(N(H(A)))))))	sp|P01023|A2MG_HUMAN	55
VSJVSCQASVSR	5 4 1 0 1	(N(F)(N(H(H(N(H)))(H(N(H(A)))))))	sp|P55058|PLTP_HUMAN	143
SYJETK	5 4 1 0 0	(N(N(H(H(N(H)))(H(N(H(A)))))))	sp|P04114|APOB_HUMAN	3224
QCRKWLCJMSIDTR	6 3 1 0 1	(N(N(H(H(H)(H))(H(N(F)(H(A)))))))	sp|Q8IWX7|UN45B_HUMAN	520
VVLHPJYSQVDIGLIK	5 4 2 0 1	(N(N(H(H(N(H(A))))(H(N(F)(H(A)))))))	sp|P00738|HPT_HUMAN	241
VVLHPJYSQVDIGLIK	4 3 1 0 0	(N(N(H(H)(H(N(H(A)))))))	sp|P00738|HPT_HUMAN	241
ENKQGWQNSIRHJLSLJK	5 4 1 0 0	(N(N(H(H(N(H)))(H(N(H(A)))))))	sp|P55316|FOXG1_HUMAN	236
VVLHPJYSQVDIGLIK	5 4 1 0 0	(N(N(H(H(N(H)))(H(N(H(A)))))))	sp|P00738|HPT_HUMAN	241
GTAGNALMDGASQLMGEJR	5 4 1 0 0	(N(N(H(H(N(H)))(H(N(H(A)))))))	sp|P02675|FIBB_HUMAN	394
WVSJKTEGR	5 4 2 0 0	(N(N(H(H(N(H(A))))(H(N(H(A)))))))	sp|P01008|ANT3_HUMAN	224
DKICDLLVANNHFAHFFAPQJLTNMNK	5 4 2 0 0	(N(N(H(H(N(H(A))))(H(N(H(A)))))))	sp|P19827|ITIH1_HUMAN	285
EEQFJSTFR	4 4 0 0 1	(N(F)(N(H(H(N))(H(N(H))))))	sp|P01859|IGHG2_HUMAN	176
QQQHLFGSJVTDCSGJFCLFR	5 4 1 0 3	(N(F)(N(H(H(N(H)(F)))(H(N(F)(H(A)))))))	sp|P02787|TRFE_HUMAN	630
DIVEYYJDSJGSHVLQGR	6 5 3 0 1	(N(N(H(H(N(F)(H(A))))(H(N(H(A)))(N(H(A)))))))	sp|P25311|ZA2G_HUMAN	109
GIVCSCPEGLQLNKDJKTCEIVDYCSNHLK	5 4 2 0 0	(N(N(H(H(N(H(A))))(H(N(H(A)))))))	sp|Q9NZR2|LRP1B_HUMAN	1209
YLGJATAIFFLPDEGK	5 4 1 0 0	(N(N(H(H(N(H)))(H(N(H(A)))))))	sp|P01009|A1AT_HUMAN	271
EEQYJSTYR	4 5 1 0 1	(N(F)(N(H(N)(H(N))(H(N(H(A)))))))	sp|P0DOX5|IGG1_HUMAN/sp|P01857|IGHG1_HUMAN	299/180
LAGKPTHVJVSVVMAEVDGTCY	5 5 1 0 1	(N(F)(N(H(H(N)(N(H)))(H(N(H(A)))))))	sp|P01876|IGHA1_HUMAN	340
QLAHQSJSTNIFFSPVSIATAFAMLSLGTK	5 4 1 0 2	(N(F)(N(H(H(N(H(A))))(H(N(H(F)))))))	sp|P01009|A1AT_HUMAN	70
VDKDLQSLEDILHQVEJK	4 4 0 0 0	(N(N(H(H(N))(H(N(H))))))	sp|P02679|FIBG_HUMAN	78
YLGJATAIFFLPDEGK	5 4 2 0 0	(N(N(H(H(N(H(A))))(H(N(H(A)))))))	sp|P01009|A1AT_HUMAN	271
VVLHPJYSQVDIGLIK	7 6 3 0 0	(N(N(H(H(N(H))(N(H(A))))(H(N(H(A)))(N(H(A)))))))	sp|P00738|HPT_HUMAN	241
RJASSAGR	5 4 2 0 0	(N(N(H(H(N(H(A))))(H(N(H(A)))))))	sp|O15553|MEFV_HUMAN	206
LPTQJITFQTESSVAEQEAEFQSPK	5 4 1 0 0	(N(N(H(H(N(H)))(H(N(H(A)))))))	sp|Q14624|ITIH4_HUMAN	517
SLGNVJFTVSAEALESQELCGTEVPSVPEHGR	5 4 1 0 0	(N(N(H(H(N(H)))(H(N(H(A)))))))	sp|P01023|A2MG_HUMAN	869
TLYETEVFSTDFSJISAAK	5 4 2 0 0	(N(N(H(H(N(H(A))))(H(N(H(A)))))))	sp|P05543|THBG_HUMAN	165
VTISGVYDLGDVLEEMGIADLFTNQAJFSR	5 4 2 0 0	(N(N(H(H(N(H(A))))(H(N(H(A)))))))	sp|P08185|CBG_HUMAN	330
MVSHHJLTTGATLINEQWLLTTAK	5 4 1 0 0	(N(N(H(H(N(H)))(H(N(H(A)))))))	sp|P00739|HPTR_HUMAN/sp|P00738|HPT_HUMAN	126/184
WVSJKTEGR	5 4 1 0 0	(N(N(H(H(N(H)))(H(N(H(A)))))))	sp|P01008|ANT3_HUMAN	224
EJGTISR	7 6 4 0 2	(N(N(H(H(N(H(A)))(N(F)(H(A))))(H(N(H(A)))(N(F)(H(A)))))))	sp|P02763|A1AG1_HUMAN	103
SLGNVJFTVSAEALESQELCGTEVPSVPEHGR	5 3 1 0 0	(N(N(H(H(H))(H(N(H(A)))))))	sp|P01023|A2MG_HUMAN	869
NEEYJK	6 5 2 0 0	(N(N(H(H(N(H(A))))(H(N(H))(N(H(A)))))))	sp|P02763|A1AG1_HUMAN/sp|P19652|A1AG2_HUMAN	56/56
LYHFLLGAWSLJATELDPCPLSPELLGLTK	6 5 3 0 1	(N(N(H(H(N(F)(H(A))))(H(N(H(A)))(N(H(A)))))))	sp|Q96PD5|PGRP2_HUMAN	77
GLTFQQJASSMCVPDQDTAIR	5 5 1 0 1	(N(F)(N(H(N)(H(N(H)))(H(N(H(A)))))))	sp|P0DOX6|IGM_HUMAN/sp|P01871|IGHM_HUMAN	332/209
AJLSSQALQMSLDYGFVTPLTSMSIR	5 4 2 0 1	(N(F)(N(H(H(N(H(A))))(H(N(H(A)))))))	sp|P19827|ITIH1_HUMAN	588
QLAHQSJSTNIFFSPVSIATAFAMLSLGTK	5 4 2 0 1	(N(F)(N(H(H(N(H(A))))(H(N(H(A)))))))	sp|P01009|A1AT_HUMAN	70
MGSJSSR	5 4 1 0 2	(N(N(H(H(N(H)(F)))(H(N(F)(H(A)))))))	sp|Q7RTS9|DYM_HUMAN	4
SVQEIQATFFYFTPJKTEDTIFLR	7 6 4 0 0	(N(N(H(H(N(H(A)))(N(H(A))))(H(N(H(A)))(N(H(A)))))))	sp|P02763|A1AG1_HUMAN/sp|P19652|A1AG2_HUMAN	72/72
SVQEIQATFFYFTPJKTEDTIFLR	7 6 3 0 0	(N(N(H(H(N(H))(N(H(A))))(H(N(H(A)))(N(H(A)))))))	sp|P02763|A1AG1_HUMAN/sp|P19652|A1AG2_HUMAN	72/72
EEQFJSTFR	6 3 1 0 1	(N(F)(N(H(H(H)(H))(H(N(H(A)))))))	sp|P01859|IGHG2_HUMAN	176
QDQCIYJTTYLNVQR	7 6 4 0 1	(N(N(H(H(N(H(A)))(N(H(A))))(H(N(H(A)))(N(F)(H(A)))))))	sp|P02763|A1AG1_HUMAN	93
LAJLTQGEDQYYLR	5 4 2 0 0	(N(N(H(H(N(H(A))))(H(N(H(A)))))))	sp|P10909|CLUS_HUMAN	374
TLJQSSDELQLSMGNAMFVK	6 5 3 0 1	(N(N(H(H(N(F)(H(A))))(H(N(H(A)))(N(H(A)))))))	sp|P01011|AACT_HUMAN	127
TLJQSSDELQLSMGNAMFVK	5 4 2 0 0	(N(N(H(H(N(H(A))))(H(N(H(A)))))))	sp|P01011|AACT_HUMAN	127
LSLHRPALEDLLLGSEAJLTCTLTGLR	5 4 2 0 1	(N(N(H(H(N(H(A))))(H(N(F)(H(A)))))))	sp|P01876|IGHA1_HUMAN/sp|P0DOX2|IGA2_HUMAN/sp|P01877|IGHA2_HUMAN	144/246/131
YTGJASALFILPDQDKMEEVEAMLLPETLKR	7 6 4 0 1	(N(N(H(H(N(H(A)))(N(H(A))))(H(N(H(A)))(N(F)(H(A)))))))	sp|P01011|AACT_HUMAN	271
STGKPTLYJVSLVMSDTAGTCY	6 2 0 0 0	(N(N(H(H(H))(H(H)(H)))))	sp|P0DOX6|IGM_HUMAN/sp|P01871|IGHM_HUMAN	563/440
LSLHRPALEDLLLGSEAJLTCTLTGLR	5 5 2 0 1	(N(N(H(N)(H(N(H(A))))(H(N(F)(H(A)))))))	sp|P01876|IGHA1_HUMAN/sp|P0DOX2|IGA2_HUMAN/sp|P01877|IGHA2_HUMAN	144/246/131
QDQCIYJTTYLNVQR	7 6 3 0 0	(N(N(H(H(N(H))(N(H(A))))(H(N(H(A)))(N(H(A)))))))	sp|P02763|A1AG1_HUMAN	93
LSLHRPALEDLLLGSEAJLTCTLTGLR	5 4 2 0 0	(N(N(H(H(N(H(A))))(H(N(H(A)))))))	sp|P01876|IGHA1_HUMAN/sp|P0DOX2|IGA2_HUMAN/sp|P01877|IGHA2_HUMAN	144/246/131
NEEYJK	6 5 3 0 0	(N(N(H(H(N(H(A))))(H(N(H(A)))(N(H(A)))))))	sp|P02763|A1AG1_HUMAN/sp|P19652|A1AG2_HUMAN	56/56
AJLSSQALQMSLDYGFVTPLTSMSIR	5 4 2 0 0	(N(N(H(H(N(H(A))))(H(N(H(A)))))))	sp|P19827|ITIH1_HUMAN	588
SVQEIQATFFYFTPJKTEDTIFLR	8 7 4 0 1	(N(N(H(H(N(H))(N(F)(H(A))))(H(N(H(A)))(N(H(N(H(A(A))))))))))	sp|P02763|A1AG1_HUMAN/sp|P19652|A1AG2_HUMAN	72/72
GCVLLSYLJETVTVSASLESVR	5 4 2 0 1	(N(N(H(H(N(H(A))))(H(N(F)(H(A)))))))	sp|P01023|A2MG_HUMAN	55
GCVLLSYLJETVTVSASLESVR	5 4 2 0 0	(N(N(H(H(N(H(A))))(H(N(H(A)))))))	sp|P01023|A2MG_HUMAN	55
GAFISJFSMTVDGK	5 4 2 0 0	(N(N(H(H(N(H(A))))(H(N(H(A)))))))	sp|P19823|ITIH2_HUMAN	118
PALEDLLLGSEAJLTCTLTGLR	4 5 0 0 0	(N(N(H(N)(H(N(H))(N(H))))))	sp|P01876|IGHA1_HUMAN/sp|P0DOX2|IGA2_HUMAN/sp|P01877|IGHA2_HUMAN	144/246/131
GLTFQQJASSMCVPDQDTAIR	5 4 1 0 1	(N(F)(N(H(H(N(H)))(H(N(H(A)))))))	sp|P0DOX6|IGM_HUMAN/sp|P01871|IGHM_HUMAN	332/209
JISDGFDGIPDNVDAALALPAHSYSGR	6 5 3 0 1	(N(N(H(H(N(F)(H(A))))(H(N(H(A)))(N(H(A)))))))	sp|P04004|VTNC_HUMAN	242
GLKFJLTETSEAEIHQSFQHLLR	6 5 3 0 1	(N(N(H(H(N(F)(H(A))))(H(N(H(A)))(N(H(A)))))))	sp|P01011|AACT_HUMAN	106
AALAAFNAQNJGSNFQLEEISR	6 5 3 0 0	(N(N(H(H(N(H(A))))(H(N(H(A)))(N(H(A)))))))	sp|P02765|FETUA_HUMAN	176
ELHHLQEQJVSNAFLDK	5 4 2 0 0	(N(N(H(H(N(H(A))))(H(N(H(A)))))))	sp|P00450|CERU_HUMAN	762
ADTHDEILEGLNFJLTEIPEAQIHEGFQELLR	6 5 3 0 1	(N(F)(N(H(H(N(H(A))))(H(N(H(A)))(N(H(A)))))))	sp|P01009|A1AT_HUMAN	107
NPPMGGNVVIFDTVITNQEEPYQJHSGR	5 4 1 0 1	(N(F)(N(H(H(N(H)))(H(N(H(A)))))))	sp|P02745|C1QA_HUMAN	146
IVLDPSGSMNIYLVLDGSDSIGASJFTGAK	5 4 2 0 0	(N(N(H(H(N(H(A))))(H(N(H(A)))))))	sp|P00751|CFAB_HUMAN	285
VVLHPJYSQVDIGLIK	6 3 1 0 0	(N(N(H(H)(H(H)(H(N(H(A))))))))	sp|P00738|HPT_HUMAN	241
ADTHDEILEGLNFJLTEIPEAQIHEGFQELLR	6 5 2 0 0	(N(N(H(H(N(H(A))))(H(N(H))(N(H(A)))))))	sp|P01009|A1AT_HUMAN	107
ELHHLQEQJVSNAFLDKGEFYIGSK	6 5 3 0 2	(N(F)(N(H(H(N(F)(H(A))))(H(N(H(A)))(N(H(A)))))))	sp|P00450|CERU_HUMAN	762
PALEDLLLGSEAJLTCTLTGLR	5 5 0 0 0	(N(N(H(H(N))(H(N(H))(N(H))))))	sp|P01876|IGHA1_HUMAN/sp|P0DOX2|IGA2_HUMAN/sp|P01877|IGHA2_HUMAN	144/246/131
MVSHHJLTTGATLINEQWLLTTAK	5 4 2 0 0	(N(N(H(H(N(H(A))))(H(N(H(A)))))))	sp|P00739|HPTR_HUMAN/sp|P00738|HPT_HUMAN	126/184
NEEYJK	5 4 2 0 0	(N(N(H(H(N(H(A))))(H(N(H(A)))))))	sp|P02763|A1AG1_HUMAN/sp|P19652|A1AG2_HUMAN	56/56
KVCQDCPLLAPLJDTR	5 4 2 0 0	(N(N(H(H(N(H(A))))(H(N(H(A)))))))	sp|P02765|FETUA_HUMAN	156
YLGJATAIFFLPDEGKLQHLENELTHDIITK	5 4 2 0 1	(N(N(H(H(N(H(A))))(H(N(F)(H(A)))))))	sp|P01009|A1AT_HUMAN	271
VLSJNSDANLELINTWVAK	6 5 3 0 1	(N(F)(N(H(H(N(H(A))))(H(N(H(A)))(N(H(A)))))))	sp|P05155|IC1_HUMAN	253
VVLHPJYSQVDIGLIK	5 4 2 0 0	(N(N(H(H(N(H(A))))(H(N(H(A)))))))	sp|P00738|HPT_HUMAN	241
FEVDSPVYJATWSASLK	5 4 2 0 0	(N(N(H(H(N(H(A))))(H(N(H(A)))))))	sp|P04114|APOB_HUMAN	3895
LNAENJATFYFK	5 4 2 0 0	(N(N(H(H(N(H(A))))(H(N(H(A)))))))	sp|P01042|KNG1_HUMAN	294
FSDGLESJSSTQFEVK	8 2 0 0 0	(N(N(H(H(H))(H(H)(H(H(H)))))))	sp|P0C0L4|CO4A_HUMAN/sp|P0C0L5|CO4B_HUMAN	226/226
SLGNVJFTVSAEALESQELCGTEVPSVPEHGRK	4 3 1 0 0	(N(N(H(H)(H(N(H(A)))))))	sp|P01023|A2MG_HUMAN	869
NEEYJK	5 4 2 0 1	(N(F)(N(H(H(N(H(A))))(H(N(H(A)))))))	sp|P02763|A1AG1_HUMAN/sp|P19652|A1AG2_HUMAN	56/56
YLGJATAIFFLPDEGK	5 4 2 0 1	(N(F)(N(H(H(N(H(A))))(H(N(H(A)))))))	sp|P01009|A1AT_HUMAN	271
HJSTGCLR	5 4 2 0 0	(N(N(H(H(N(H(A))))(H(N(H(A)))))))	sp|P10909|CLUS_HUMAN	291
AVJITSENLIDDVVSLIR	5 4 2 0 0	(N(N(H(H(N(H(A))))(H(N(H(A)))))))	sp|P02748|CO9_HUMAN	415
AVJITSENLIDDVVSLIR	5 4 1 0 1	(N(N(H(H(N(H)(F)))(H(N(H(A)))))))	sp|P02748|CO9_HUMAN	415
LSLHRPALEDLLLGSEAJLTCTLTGLR	5 4 1 0 1	(N(N(H(H(N(H)(F)))(H(N(H(A)))))))	sp|P01876|IGHA1_HUMAN/sp|P0DOX2|IGA2_HUMAN/sp|P01877|IGHA2_HUMAN	144/246/131
SVQEIQATFFYFTPJKTEDTIFLR	6 5 2 0 1	(N(N(H(H(N(H)(F)))(H(N(H(A)))(N(H(A)))))))	sp|P02763|A1AG1_HUMAN/sp|P19652|A1AG2_HUMAN	72/72
FSDGLESJSSTQFEVK	8 2 0 0 0	(N(N(H(H)(H(H)(H(H(H(H))))))))	sp|P0C0L4|CO4A_HUMAN/sp|P0C0L5|CO4B_HUMAN	226/226
CSDGWSFDATTLDDJGTMLFFK	5 4 2 0 0	(N(N(H(H(N(H(A))))(H(N(H(A)))))))	sp|P02790|HEMO_HUMAN	64
IIVPLNNREJISDPTSPLR	5 5 1 0 0	(N(N(H(N)(H(N(H)))(H(N(H(A)))))))	sp|P01591|IGJ_HUMAN	71
QDQCIYJTTYLNVQR	7 6 3 0 1	(N(N(H(H(N(H))(N(F)(H(A))))(H(N(H(A)))(N(H(A)))))))	sp|P02763|A1AG1_HUMAN	93
EJLSVEIR	5 4 1 0 2	(N(N(H(H(N(H)(F)))(H(N(F)(H(A)))))))	sp|P49454|CENPF_HUMAN	674
EEQFJSTFR	5 4 1 0 0	(N(N(H(H(H))(H(N)(N(H(A)))))))	sp|P01859|IGHG2_HUMAN	176
EEQFJSTFR	4 4 1 0 1	(N(F)(N(H(H(N))(H(N(H(A)))))))	sp|P01859|IGHG2_HUMAN	176
ADGTVNQIEGEATPVJLTEPAK	4 3 1 0 0	(N(N(H(H)(H(N(H(A)))))))	sp|P05090|APOD_HUMAN	98
GTAGNALMDGASQLMGEJR	5 4 2 0 0	(N(N(H(H(N(H(A))))(H(N(H(A)))))))	sp|P02675|FIBB_HUMAN	394
LSLHRPALEDLLLGSEAJLTCTLTGLR	5 5 1 0 0	(N(N(H(N)(H(N(H)))(H(N(H(A)))))))	sp|P01876|IGHA1_HUMAN/sp|P0DOX2|IGA2_HUMAN/sp|P01877|IGHA2_HUMAN	144/246/131
TLJQSSDELQLSMGNAMFVK	6 5 3 0 0	(N(N(H(H(N(H(A))))(H(N(H(A)))(N(H(A)))))))	sp|P01011|AACT_HUMAN	127
STGKPTLYJVSLVMSDTAGTCY	6 2 0 0 0	(N(N(H(H)(H(H)(H(H))))))	sp|P0DOX6|IGM_HUMAN/sp|P01871|IGHM_HUMAN	563/440
CGLVPVLAENYJK	5 4 2 0 0	(N(N(H(H(N(H(A))))(H(N(H(A)))))))	sp|P02787|TRFE_HUMAN	432
AALAAFNAQNJGSNFQLEEISR	5 4 2 0 0	(N(N(H(H(N(H(A))))(H(N(H(A)))))))	sp|P02765|FETUA_HUMAN	176
ELHHLQEQJVSNAFLDK	6 5 3 0 0	(N(N(H(H(N(H(A))))(H(N(H(A)))(N(H(A)))))))	sp|P00450|CERU_HUMAN	762
ADTHDEILEGLNFJLTEIPEAQIHEGFQELLR	5 4 1 0 1	(N(F)(N(H(H(N(H)))(H(N(H(A)))))))	sp|P01009|A1AT_HUMAN	107
SLGNVJFTVSAEALESQELCGTEVPSVPEHGR	6 3 1 0 0	(N(N(H(H)(H(H)(H(N(H(A))))))))	sp|P01023|A2MG_HUMAN	869
PALEDLLLGSEAJLTCTLTGLR	6 5 1 0 0	(N(N(H(H(N(H(A))))(H(N(H))(N(H))))))	sp|P01876|IGHA1_HUMAN/sp|P0DOX2|IGA2_HUMAN/sp|P01877|IGHA2_HUMAN	144/246/131
LSLHRPALEDLLLGSEAJLTCTLTGLR	5 4 1 0 0	(N(N(H(H(N(H)))(H(N(H(A)))))))	sp|P01876|IGHA1_HUMAN/sp|P0DOX2|IGA2_HUMAN/sp|P01877|IGHA2_HUMAN	144/246/131
QDQCIYJTTYLNVQR	5 4 2 0 0	(N(N(H(H(N(H(A))))(H(N(H(A)))))))	sp|P02763|A1AG1_HUMAN	93
EHEGAIYPDJTTDFQR	6 5 3 0 1	(N(N(H(H(N(F)(H(A))))(H(N(H(A)))(N(H(A)))))))	sp|P00450|CERU_HUMAN	138
SLTFJETYQDISELVYGAK	5 4 2 0 0	(N(N(H(H(N(H(A))))(H(N(H(A)))))))	sp|P01008|ANT3_HUMAN	187
QDQCIYJTTYLNVQR	7 5 2 0 1	(N(N(H(N)(H(H)(H))(H(N(H(A)))(N(F)(H(A)))))))	sp|P02763|A1AG1_HUMAN	93
AALAAFNAQNJGSNFQLEEISR	7 5 2 0 1	(N(N(H(N)(H(H)(H))(H(N(H(A)))(N(F)(H(A)))))))	sp|P02765|FETUA_HUMAN	176
EHEGAIYPDJTTDFQR	5 4 2 0 0	(N(N(H(H(N(H(A))))(H(N(H(A)))))))	sp|P00450|CERU_HUMAN	138
LAGKPTHVJVSVVMAEVDGTCY	4 3 1 0 1	(N(F)(N(H(H)(H(N(H(A)))))))	sp|P01876|IGHA1_HUMAN	340
VVLHPJYSQVDIGLIK	7 6 3 0 1	(N(N(H(H(N(H)(F))(N(H(A))))(H(N(H(A)))(N(H(A)))))))	sp|P00738|HPT_HUMAN	241
PALEDLLLGSEAJLTCTLTGLR	5 5 1 0 1	(N(N(H(H(N(F)))(H(N(H))(N(H(A)))))))	sp|P01876|IGHA1_HUMAN/sp|P0DOX2|IGA2_HUMAN/sp|P01877|IGHA2_HUMAN	144/246/131
JVSVEALASALQLLAR	5 4 2 0 0	(N(N(H(H(N(H(A))))(H(N(H(A)))))))	sp|Q13790|APOF_HUMAN	139
FJLTETSEAEIHQSFQHLLR	7 6 3 0 0	(N(N(H(H(N(H))(N(H(A))))(H(N(H(A)))(N(H(A)))))))	sp|P01011|AACT_HUMAN	106
EHEGAIYPDJTTDFQR	6 5 4 0 0	(N(N(H(H(N(H(A))))(H(N(H(A)))(N(H(A)(A)))))))	sp|P00450|CERU_HUMAN	138
GTAGNALMDGASQLMGEJR	4 3 0 0 0	(N(N(H(H)(H(N(H))))))	sp|P02675|FIBB_HUMAN	394
VSJQTLSLFFTVLQDVPVR	5 4 2 0 1	(N(N(H(H(N(H(A))))(H(N(F)(H(A)))))))	sp|P01023|A2MG_HUMAN	1424
QQQHLFGSJVTDCSGJFCLFR	5 4 2 0 0	(N(N(H(H(N(H(A))))(H(N(H(A)))))))	sp|P02787|TRFE_HUMAN	630
TPLTAJITK	5 4 2 0 1	(N(F)(N(H(H(N(H(A))))(H(N(H(A)))))))	sp|P0DOX2|IGA2_HUMAN/sp|P01877|IGHA2_HUMAN	320/205
QDQCIYJTTYLNVQR	8 7 3 0 1	(N(N(H(H(N(H))(N(F)(H(A))))(H(N(H(A)))(N(H(N(H(A)))))))))	sp|P02763|A1AG1_HUMAN	93
HAJWTLTPLK	5 3 1 0 0	(N(N(H(H(H))(H(N(H(A)))))))	sp|P27169|PON1_HUMAN	253
VYLQGLIDCYLFGJSSTVLEDSK	5 4 1 0 0	(N(N(H(H(N(H)))(H(N(H(A)))))))	sp|P35542|SAA4_HUMAN	94
SLGNVJFTVSAEALESQELCGTEVPSVPEHGRK	5 3 1 0 0	(N(N(H(H(H))(H(N(H(A)))))))	sp|P01023|A2MG_HUMAN	869
QDQCIYJTTYLNVQR	7 6 4 0 0	(N(N(H(H(N(H(A)))(N(H(A))))(H(N(H(A)))(N(H(A)))))))	sp|P02763|A1AG1_HUMAN	93
DTGELJVTSILDREETPFFLLTGYALDAR	5 4 2 0 0	(N(N(H(H(N(H(A))))(H(N(H(A)))))))	sp|Q14126|DSG2_HUMAN	112
LAGKPTHVJVSVVMAEVDGTCY	5 4 2 0 1	(N(F)(N(H(H(N(H(A))))(H(N(H(A)))))))	sp|P01876|IGHA1_HUMAN	340
KALQAVYSMMSWPDDVPPEGWJR	5 4 2 0 0	(N(N(H(H(N(H(A))))(H(N(H(A)))))))	sp|P00751|CFAB_HUMAN	378
EJLTAPGSDSAVFFEQGTTR	5 4 1 0 0	(N(N(H(H(N(H)))(H(N(H(A)))))))	sp|P00450|CERU_HUMAN	397
JGSLFAFR	5 3 1 0 0	(N(N(H(H(H))(H(N(H(A)))))))	sp|P04004|VTNC_HUMAN	169
ADTHDEILEGLNFJLTEIPEAQIHEGFQELLR	7 6 4 0 0	(N(N(H(H(N(H(A)))(N(H(A))))(H(N(H(A)))(N(H(A)))))))	sp|P01009|A1AT_HUMAN	107
VDKDLQSLEDILHQVEJK	5 4 1 0 0	(N(N(H(H(N(H)))(H(N(H(A)))))))	sp|P02679|FIBG_HUMAN	78
YAEDKFJETTEK	5 4 2 0 0	(N(N(H(H(N(H(A))))(H(N(H(A)))))))	sp|P43652|AFAM_HUMAN	402
SVQEIQATFFYFTPJKTEDTIFLR	6 5 2 0 0	(N(N(H(H(N(H(A))))(H(N(H))(N(H(A)))))))	sp|P02763|A1AG1_HUMAN/sp|P19652|A1AG2_HUMAN	72/72
EEQYJSTYR	5 4 0 0 1	(N(F)(N(H(H(N(H)))(H(N(H))))))	sp|P0DOX5|IGG1_HUMAN/sp|P01857|IGHG1_HUMAN	299/180
VVLHPJYSQVDIGLIK	3 3 1 0 0	(N(N(H(H(N(H(A)))))))	sp|P00738|HPT_HUMAN	241
JGTLVAFR	6 3 1 0 0	(N(N(H(H)(H(H)(H(N(H(A))))))))	sp|Q92954|PRG4_HUMAN	1159
VVLHPJYSQVDIGLIK	6 5 1 0 0	(N(N(H(H(N(H(A))))(H(N(H))(N(H))))))	sp|P00738|HPT_HUMAN	241
GLJLTEDTYKPR	6 5 3 0 1	(N(N(H(H(N(F)(H(A))))(H(N(H(A)))(N(H(A)))))))	sp|Q08380|LG3BP_HUMAN	398
KAJTSSSSSJSSKLPPVCYEIITLK	5 4 2 0 0	(N(N(H(H(N(H(A))))(H(N(H(A)))))))	sp|Q9Y2F9|BTBD3_HUMAN	34
EEQFJSTFR	5 4 1 0 1	(N(F)(N(H(H(N(H)))(H(N(H(A)))))))	sp|P01859|IGHG2_HUMAN	176
DTGELJVTSILDREETPFFLLTGYALDAR	5 4 1 0 0	(N(N(H(H(N(H)))(H(N(H(A)))))))	sp|Q14126|DSG2_HUMAN	112
VVLHPJYSQVDIGLIK	6 5 2 0 0	(N(N(H(H(N(H(A))))(H(N(H))(N(H(A)))))))	sp|P00738|HPT_HUMAN	241
EGDHEFLEVPEAQEDVEATFPVHQPGJYSCSYR	6 5 3 0 0	(N(N(H(H(N(H(A))))(H(N(H(A)))(N(H(A)))))))	sp|P04217|A1BG_HUMAN	179
HGVIISSTVDTYEJGSSVEYR	6 5 3 0 0	(N(N(H(H(N(H(A))))(H(N(H(A)))(N(H(A)))))))	sp|P05160|F13B_HUMAN	545
ADTHDEILEGLNFJLTEIPEAQIHEGFQELLR	5 4 2 0 0	(N(N(H(H(N(H(A))))(H(N(H(A)))))))	sp|P01009|A1AT_HUMAN	107
VTQVYAEJGTVLQGSTVASVYK	6 5 3 0 1	(N(N(H(H(N(F)(H(A))))(H(N(H(A)))(N(H(A)))))))	sp|P27169|PON1_HUMAN	324
DVQIIVFPEDGIHGFJFTR	5 4 2 0 0	(N(N(H(H(N(H(A))))(H(N(H(A)))))))	sp|P43251|BTD_HUMAN	119
REGDHEFLEVPEAQEDVEATFPVHQPGJYSCSYR	5 4 2 0 0	(N(N(H(H(N(H(A))))(H(N(H(A)))))))	sp|P04217|A1BG_HUMAN	179
VSJQTLSLFFTVLQDVPVR	5 4 2 0 0	(N(N(H(H(N(H(A))))(H(N(H(A)))))))	sp|P01023|A2MG_HUMAN	1424
EEQYJSTYR	5 4 1 0 0	(N(N(H(H(N(H)))(H(N(H(A)))))))	sp|P0DOX5|IGG1_HUMAN/sp|P01857|IGHG1_HUMAN	299/180
ALPQPQJVTSLLGCTH	5 4 1 0 0	(N(N(H(H(N(H)))(H(N(H(A)))))))	sp|P02790|HEMO_HUMAN	453
EJGTISR	7 6 4 0 3	(N(F)(N(H(H(N(H(A)))(N(F)(H(A))))(H(N(H(A)))(N(F)(H(A)))))))	sp|P02763|A1AG1_HUMAN	103
ADTHDEILEGLNFJLTEIPEAQIHEGFQELLR	6 5 3 0 1	(N(N(H(H(N(F)(H(A))))(H(N(H(A)))(N(H(A)))))))	sp|P01009|A1AT_HUMAN	107
JISDGFDGIPDNVDAALALPAHSYSGR	5 4 2 0 0	(N(N(H(H(N(H(A))))(H(N(H(A)))))))	sp|P04004|VTNC_HUMAN	242
VVLHPJYSQVDIGLIK	4 4 1 0 0	(N(N(H(H(N))(H(N(H(A)))))))	sp|P00738|HPT_HUMAN	241
QVLFLDTVYGJCSTHFTVK	5 2 0 0 0	(N(N(H(H(H)(H(H))))))	sp|P04114|APOB_HUMAN	185
KIVLDPSGSMNIYLVLDGSDSIGASJFTGAK	5 4 2 0 0	(N(N(H(H(N(H(A))))(H(N(H(A)))))))	sp|P00751|CFAB_HUMAN	285
QDQCIYJTTYLNVQR	7 6 4 0 2	(N(F)(N(H(H(N(H(A)))(N(H(A))))(H(N(H(A)))(N(F)(H(A)))))))	sp|P02763|A1AG1_HUMAN	93
NCGVJCSGDVFTALIGEIASPNYPKPYPENSR	5 4 2 0 0	(N(N(H(H(N(H(A))))(H(N(H(A)))))))	sp|P09871|C1S_HUMAN	174
MLFVEPILEVSSLPTTJSTTNSATK	6 5 3 0 0	(N(N(H(H(N(H(A))))(H(N(H(A)))(N(H(A)))))))	sp|P05155|IC1_HUMAN	69
IIVPLNNREJISDPTSPLR	5 3 1 0 1	(N(F)(N(H(H(H))(H(N(H(A)))))))	sp|P01591|IGJ_HUMAN	71
VCQDCPLLAPLJDTR	6 5 3 0 0	(N(N(H(H(N(H(A))))(H(N(H(A)))(N(H(A)))))))	sp|P02765|FETUA_HUMAN	156
JLTTSLTESVDR	5 4 2 0 0	(N(N(H(H(N(H(A))))(H(N(H(A)))))))	sp|P80108|PHLD_HUMAN	307
TLJQSSDELQLSMGNAMFVK	5 4 1 0 2	(N(N(H(H(N(H)(F)))(H(N(F)(H(A)))))))	sp|P01011|AACT_HUMAN	127
NEEYJK	5 4 2 0 1	(N(N(H(H(N(H(A))))(H(N(F)(H(A)))))))	sp|P02763|A1AG1_HUMAN/sp|P19652|A1AG2_HUMAN	56/56
GFGVAIVGJYTAALPTEAALR	5 4 2 0 0	(N(N(H(H(N(H(A))))(H(N(H(A)))))))	sp|Q96PD5|PGRP2_HUMAN	485
NVIFSPLSISTALAFLSLGAHJTTLTEILK	6 5 3 0 0	(N(N(H(H(N(H(A))))(H(N(H(A)))(N(H(A)))))))	sp|P01011|AACT_HUMAN	93
QRRJRTTFJSSQLQALER	4 3 2 0 0	(N(N(H(H)(H(N(H(A(A))))))))	sp|P54821|PRRX1_HUMAN/sp|Q99811|PRRX2_HUMAN	97/107
QJQCFYJSSYLNVQR	7 6 2 0 0	(N(N(H(H(N(H))(N(H(A))))(H(N(H))(N(H(A)))))))	sp|P19652|A1AG2_HUMAN	88
TAFITJFTLTIDGVTYPGNVK	5 4 2 0 0	(N(N(H(H(N(H(A))))(H(N(H(A)))))))	sp|Q06033|ITIH3_HUMAN	91
QVLFLDTVYGJCSTHFTVK	5 2 0 0 0	(N(N(H(H)(H(H)(H)))))	sp|P04114|APOB_HUMAN	185
EJLTQQLLREVAEYQR	4 3 2 0 0	(N(N(H(H)(H(N(H(A(A))))))))	sp|Q86SQ0|PHLB2_HUMAN	742
LDAPTNLQFVJETDSTVLVR	5 4 2 0 0	(N(N(H(H(N(H(A))))(H(N(H(A)))))))	sp|P02751|FINC_HUMAN	1007
AFITJFSMIIDGMTYPGIIK	5 4 2 0 0	(N(N(H(H(N(H(A))))(H(N(H(A)))))))	sp|Q14624|ITIH4_HUMAN	81
AALAAFNAQNJGSNFQLEEISR	5 4 1 0 0	(N(N(H(H(N(H)))(H(N(H(A)))))))	sp|P02765|FETUA_HUMAN	176
ALPQPQJVTSLLGCTH	5 4 2 0 1	(N(F)(N(H(H(N(H(A))))(H(N(H(A)))))))	sp|P02790|HEMO_HUMAN	453
QLAHQSJSTNIFFSPVSIATAFAMLSLGTK	5 4 1 0 0	(N(N(H(H(N(H)))(H(N(H(A)))))))	sp|P01009|A1AT_HUMAN	70
FSLLGHASISCTVEJETIGVWRPSPPTCEK	5 4 2 0 0	(N(N(H(H(N(H(A))))(H(N(H(A)))))))	sp|P04003|C4BPA_HUMAN	221
GCVLLSYLJETVTVSASLESVR	6 5 1 0 2	(N(F)(N(H(H(N(H)(F)))(H(N(H(N(H(A)))))))))	sp|P01023|A2MG_HUMAN	55
LPTQJITFQTESSVAEQEAEFQSPK	5 4 2 0 1	(N(F)(N(H(H(N(H(A))))(H(N(H(A)))))))	sp|Q14624|ITIH4_HUMAN	517
FSDGLESJSSTQFEVK	9 2 0 0 0	(N(N(H(H(H(H)))(H(H)(H(H)(H))))))	sp|P0C0L4|CO4A_HUMAN/sp|P0C0L5|CO4B_HUMAN	226/226
SVQEIQATFFYFTPJKTEDTIFLR	7 6 3 0 3	(N(F)(N(H(H(N(H)(F))(N(H(A))))(H(N(H(A)))(N(F)(H(A)))))))	sp|P02763|A1AG1_HUMAN/sp|P19652|A1AG2_HUMAN	72/72
SVQEIQATFFYFTPJKTEDTIFLR	6 5 3 0 1	(N(N(H(H(N(F)(H(A))))(H(N(H(A)))(N(H(A)))))))	sp|P02763|A1AG1_HUMAN/sp|P19652|A1AG2_HUMAN	72/72
LAGKPTHVJVSVVMAEVDGTCY	6 6 2 0 1	(N(F)(N(H(N)(H(N(H(A))))(H(N(H))(N(H(A)))))))	sp|P01876|IGHA1_HUMAN	340
NEEYJK	7 5 2 0 1	(N(N(H(N)(H(H)(H))(H(N(H(A)))(N(F)(H(A)))))))	sp|P02763|A1AG1_HUMAN/sp|P19652|A1AG2_HUMAN	56/56
YLGJATAIFFLPDEGK	4 3 1 0 0	(N(N(H(H)(H(N(H(A)))))))	sp|P01009|A1AT_HUMAN	271
LSLHRPALEDLLLGSEAJLTCTLTGLR	5 5 1 0 1	(N(N(H(N)(H(N(H)(F)))(H(N(H(A)))))))	sp|P01876|IGHA1_HUMAN/sp|P0DOX2|IGA2_HUMAN/sp|P01877|IGHA2_HUMAN	144/246/131
SLGNVJFTVSAEALESQELCGTEVPSVPEHGRK	6 3 1 0 0	(N(N(H(H)(H(H)(H(N(H(A))))))))	sp|P01023|A2MG_HUMAN	869
VSJQTLSLFFTVLQDVPVR	5 5 0 0 2	(N(F)(N(H(H(N(F)))(H(N(H))(N(H))))))	sp|P01023|A2MG_HUMAN	1424
FJLTETSEAEIHQSFQHLLR	5 4 2 0 0	(N(N(H(H(N(H(A))))(H(N(H(A)))))))	sp|P01011|AACT_HUMAN	106
SVQEIQATFFYFTPJKTEDTIFLR	7 6 4 0 1	(N(F)(N(H(H(N(H(A(N(H(A)))))))(H(N(H(A(N(H(A))))))))))	sp|P02763|A1AG1_HUMAN/sp|P19652|A1AG2_HUMAN	72/72
EJLTAPGSDSAVFFEQGTTR	5 4 2 0 0	(N(N(H(H(N(H(A))))(H(N(H(A)))))))	sp|P00450|CERU_HUMAN	397
STGKPTLYJVSLVMSDTAGTCY	8 2 0 0 0	(N(N(H(H(H(H)))(H(H)(H)(H)))))	sp|P0DOX6|IGM_HUMAN/sp|P01871|IGHM_HUMAN	563/440
ADGTVNQIEGEATPVJLTEPAK	5 4 2 0 0	(N(N(H(H(N(H(A))))(H(N(H(A)))))))	sp|P05090|APOD_HUMAN	98
ITYSIVQTJCSK	6 5 3 0 0	(N(N(H(H(N(H(A))))(H(N(H(A)))(N(H(A)))))))	sp|P01042|KNG1_HUMAN	205
VSJQTLSLFFTVLQDVPVR	6 5 3 0 0	(N(N(H(H(N(H(A))))(H(N(H(A)))(N(H(A)))))))	sp|P01023|A2MG_HUMAN	1424
LPTQJITFQTESSVAEQEAEFQSPK	6 5 3 0 0	(N(N(H(H(N(H(A))))(H(N(H(A)))(N(H(A)))))))	sp|Q14624|ITIH4_HUMAN	517
QJQCFYJSSYLNVQR	7 6 3 0 1	(N(N(H(H(N(H))(N(F)(H(A))))(H(N(H(A)))(N(H(A)))))))	sp|P19652|A1AG2_HUMAN	88
SWPAVGJCSSALR	5 4 2 0 0	(N(N(H(H(N(H(A))))(H(N(H(A)))))))	sp|P02790|HEMO_HUMAN	187
VVLHPJYSQVDIGLIK	6 5 3 0 0	(N(N(H(H(N(H(A))))(H(N(H(A)))(N(H(A)))))))	sp|P00738|HPT_HUMAN	241
KGCVLLSHLJETVTVSASLESGR	5 4 1 0 0	(N(N(H(H(N(H)))(H(N(H(A)))))))	sp|P20742|PZP_HUMAN	54
SVQEIQATFFYFTPJKTEDTIFLR	5 4 2 0 0	(N(N(H(H(N(H(A))))(H(N(H(A)))))))	sp|P02763|A1AG1_HUMAN/sp|P19652|A1AG2_HUMAN	72/72
GLTFQQJASSMCVPDQDTAIR	5 5 1 0 1	(N(F)(N(H(H(N)(N(H)))(H(N(H(A)))))))	sp|P0DOX6|IGM_HUMAN/sp|P01871|IGHM_HUMAN	332/209
QFLECSRSIGTDJVCR	5 4 2 0 0	(N(N(H(H(N(H(A))))(H(N(H(A)))))))	sp|Q9UI26|IPO11_HUMAN	260
NEEYJK	6 5 2 0 1	(N(N(H(H(N(F)(H(A))))(H(N(H))(N(H(A)))))))	sp|P02763|A1AG1_HUMAN/sp|P19652|A1AG2_HUMAN	56/56
QVQVLQJLTTTYEIVLWQPVTADLIVK	5 4 2 0 0	(N(N(H(H(N(H(A))))(H(N(H(A)))))))	sp|Q96IY4|CBPB2_HUMAN	44
PALEDLLLGSEAJLTCTLTGLR	4 4 0 0 0	(N(N(H(H(N))(H(N(H))))))	sp|P01876|IGHA1_HUMAN/sp|P0DOX2|IGA2_HUMAN/sp|P01877|IGHA2_HUMAN	144/246/131
QLAHQSJSTNIFFSPVSIATAFAMLSLGTK	6 5 2 0 1	(N(N(H(H(N(H)(F)))(H(N(H(A)))(N(H(A)))))))	sp|P01009|A1AT_HUMAN	70
ALPQPQJVTSLLGCTH	6 5 3 0 0	(N(N(H(H(N(H(A))))(H(N(H(A)))(N(H(A)))))))	sp|P02790|HEMO_HUMAN	453
VEJTTVYYLVLDVQESDCSVLSR	5 4 2 0 0	(N(N(H(H(N(H(A))))(H(N(H(A)))))))	sp|P04196|HRG_HUMAN	63
QJQCFYJSSYLNVQR	6 5 3 0 1	(N(N(H(H(N(F)(H(A))))(H(N(H(A)))(N(H(A)))))))	sp|P19652|A1AG2_HUMAN	88
TLJQSSDELQLSMGNAMFVK	5 4 2 0 1	(N(N(H(H(N(H(A))))(H(N(F)(H(A)))))))	sp|P01011|AACT_HUMAN	127
LYHFLLGAWSLJATELDPCPLSPELLGLTK	5 4 2 0 0	(N(N(H(H(N(H(A))))(H(N(H(A)))))))	sp|Q96PD5|PGRP2_HUMAN	77
QDQCIYJTTYLNVQR	7 6 3 0 1	(N(N(H(H(N(H)(F))(N(H(A))))(H(N(H(A)))(N(H(A)))))))	sp|P02763|A1AG1_HUMAN	93
GLKFJLTETSEAEIHQSFQHLLR	7 6 3 0 1	(N(N(H(H(N(H)(F))(N(H(A))))(H(N(H(A)))(N(H(A)))))))	sp|P01011|AACT_HUMAN	106
EHEGAIYPDJTTDFQR	5 4 1 0 0	(N(N(H(H(N(H)))(H(N(H(A)))))))	sp|P00450|CERU_HUMAN	138
QLAHQSJSTNIFFSPVSIATAFAMLSLGTK	6 5 3 0 0	(N(N(H(H(N(H(A))))(H(N(H(A)))(N(H(A)))))))	sp|P01009|A1AT_HUMAN	70
EJGTISR	8 6 3 0 2	(N(N(H(H(N(H(A)))(N(F)(H(H))))(H(N(H(A)))(N(F)(H(A)))))))	sp|P02763|A1AG1_HUMAN	103
IDSTGJVTNELR	5 2 0 0 0	(N(N(H(H)(H(H(H))))))	sp|O75882|ATRN_HUMAN	416
ELQQFJYTWLRLIK	5 4 2 0 0	(N(N(H(H(N(H(A))))(H(N(H(A)))))))	sp|Q7Z7M9|GALT5_HUMAN	845
QQQHLFGSJVTDCSGJFCLFR	6 5 2 0 0	(N(N(H(H(N(H(A))))(H(N(H))(N(H(A)))))))	sp|P02787|TRFE_HUMAN	630
QQQHLFGSJVTDCSGJFCLFR	6 4 2 0 0	(N(N(H(H(N(H(A))))(H(N(H(H)(A)))))))	sp|P02787|TRFE_HUMAN	630
SLGNVJFTVSAEALESQELCGTEVPSVPEHGR	5 2 0 0 0	(N(N(H(H)(H(H)(H)))))	sp|P01023|A2MG_HUMAN	869
QSVPAHFVALJGSK	6 2 0 0 0	(N(N(H(H)(H(H)(H(H))))))	sp|P06681|CO2_HUMAN	621
PALEDLLLGSEAJLTCTLTGLR	6 3 1 0 0	(N(N(H(H)(H(H)(H(N(H(A))))))))	sp|P01876|IGHA1_HUMAN/sp|P0DOX2|IGA2_HUMAN/sp|P01877|IGHA2_HUMAN	144/246/131
LPTQJITFQTESSVAEQEAEFQSPK	6 5 3 0 2	(N(F)(N(H(H(N(F)(H(A))))(H(N(H(A)))(N(H(A)))))))	sp|Q14624|ITIH4_HUMAN	517
ADTHDEILEGLNFJLTEIPEAQIHEGFQELLR	5 4 2 0 1	(N(F)(N(H(H(N(H(A))))(H(N(H(A)))))))	sp|P01009|A1AT_HUMAN	107
QLAHQSJSTNIFFSPVSIATAFAMLSLGTK	6 5 3 0 1	(N(F)(N(H(H(N(H(A))))(H(N(H(A)))(N(H(A)))))))	sp|P01009|A1AT_HUMAN	70
VLSJNSDANLELINTWVAK	5 4 2 0 1	(N(N(H(H(N(H(A))))(H(N(F)(H(A)))))))	sp|P05155|IC1_HUMAN	253
VVLHPJYSQVDIGLIK	3 3 0 0 0	(N(N(H(H(N(H))))))	sp|P00738|HPT_HUMAN	241
GLTFQQJASSMCVPDQDTAIR	5 4 1 0 1	(N(N(H(H(N(H)(F)))(H(N(H(A)))))))	sp|P0DOX6|IGM_HUMAN/sp|P01871|IGHM_HUMAN	332/209
VLSJNSDANLELINTWVAK	6 5 3 0 0	(N(N(H(H(N(H(A))))(H(N(H(A)))(N(H(A)))))))	sp|P05155|IC1_HUMAN	253
ESVTDHVNLITPLEKPLQJFTLCFR	5 4 2 0 0	(N(N(H(H(N(H(A))))(H(N(H(A)))))))	sp|P02743|SAMP_HUMAN	51
LGACJDTLQQLMEVFK	5 4 2 0 1	(N(N(H(H(N(H(A))))(H(N(F)(H(A)))))))	sp|P01008|ANT3_HUMAN	128
GLTFQQJASSMCVPDQDTAIR	6 5 1 0 1	(N(N(H(H(N(H)(F)))(H(N(H(N(H(A)))))))))	sp|P0DOX6|IGM_HUMAN/sp|P01871|IGHM_HUMAN	332/209
MVSHHJLTTGATLINEQWLLTTAK	6 5 2 0 0	(N(N(H(H(N(H(A))))(H(N(H))(N(H(A)))))))	sp|P00739|HPTR_HUMAN/sp|P00738|HPT_HUMAN	126/184
LAGKPTHVJVSVVMAEVDGTCY	5 5 1 0 0	(N(N(H(N)(H(N(H)))(H(N(H(A)))))))	sp|P01876|IGHA1_HUMAN	340
PALEDLLLGSEAJLTCTLTGLR	5 5 1 0 0	(N(N(H(N)(H(N(H)))(H(N(H(A)))))))	sp|P01876|IGHA1_HUMAN/sp|P0DOX2|IGA2_HUMAN/sp|P01877|IGHA2_HUMAN	144/246/131
QLAHQSJSTNIFFSPVSIATAFAMLSLGTK	6 4 1 0 1	(N(N(H(H(H))(H(N(H)(F))(N(H(A)))))))	sp|P01009|A1AT_HUMAN	70
LSLHRPALEDLLLGSEAJLTCTLTGLR	4 5 1 0 1	(N(F)(N(H(N)(H(N(H))(N(H(A)))))))	sp|P01876|IGHA1_HUMAN/sp|P0DOX2|IGA2_HUMAN/sp|P01877|IGHA2_HUMAN	144/246/131
IQSPLFTLDANADIGJGTTSANEAGIAASITAK	5 4 1 0 0	(N(N(H(H(N(H)))(H(N(H(A)))))))	sp|P04114|APOB_HUMAN	2779
SPYYJVSDEISFHCYDGYTLR	5 4 2 0 0	(N(N(H(H(N(H(A))))(H(N(H(A)))))))	sp|P00751|CFAB_HUMAN	122
GLTFQQJASSMCVPDQDTAIR	5 5 2 0 1	(N(F)(N(H(N)(H(N(H(A))))(H(N(H(A)))))))	sp|P0DOX6|IGM_HUMAN/sp|P01871|IGHM_HUMAN	332/209
NEEYJK	6 5 3 0 1	(N(N(H(H(N(F)(H(A))))(H(N(H(A)))(N(H(A)))))))	sp|P02763|A1AG1_HUMAN/sp|P19652|A1AG2_HUMAN	56/56
SWPAVGJCSSALR	5 4 2 0 1	(N(F)(N(H(H(N(H(A))))(H(N(H(A)))))))	sp|P02790|HEMO_HUMAN	187
LHHKRLAKECMLQEEJK	5 4 1 0 0	(N(N(H(H(N(H)))(H(N(H(A)))))))	sp|Q8NA61|SPERT_HUMAN	172
EEQYJSTYR	4 3 1 0 1	(N(F)(N(H(H)(H(N(H(A)))))))	sp|P0DOX5|IGG1_HUMAN/sp|P01857|IGHG1_HUMAN	299/180
NEEYJK	5 4 1 0 0	(N(N(H(H(N(H)))(H(N(H(A)))))))	sp|P02763|A1AG1_HUMAN/sp|P19652|A1AG2_HUMAN	56/56
TLJQSSDELQLSMGNAMFVK	7 6 2 0 0	(N(N(H(H(N(H))(N(H(A))))(H(N(H))(N(H(A)))))))	sp|P01011|AACT_HUMAN	127
QLAHQSJSTNIFFSPVSIATAFAMLSLGTK	5 4 2 0 2	(N(F)(N(H(H(N(H(A))))(H(N(F)(H(A)))))))	sp|P01009|A1AT_HUMAN	70
QLEEFLJQSSPFYFWMNGDR	6 5 3 0 1	(N(N(H(H(N(F)(H(A))))(H(N(H(A)))(N(H(A)))))))	sp|P10909|CLUS_HUMAN	145
VIDFJCTTSSVSSALANTK	5 4 2 0 0	(N(N(H(H(N(H(A))))(H(N(H(A)))))))	sp|P04196|HRG_HUMAN	125
SLGNVJFTVSAEALESQELCGTEVPSVPEHGR	5 2 0 0 0	(N(N(H(H(H(H(H)))))))	sp|P01023|A2MG_HUMAN	869
FJSSYLQGTNQITGR	5 4 1 0 0	(N(N(H(H(N(H)))(H(N(H(A)))))))	sp|P04114|APOB_HUMAN	1523
IDSTGJVTNELR	5 2 0 0 0	(N(N(H(H(H))(H(H)))))	sp|O75882|ATRN_HUMAN	416
TPLTAJITK	5 4 1 0 1	(N(F)(N(H(H(N(H)))(H(N(H(A)))))))	sp|P0DOX2|IGA2_HUMAN/sp|P01877|IGHA2_HUMAN	320/205
YLGJATAIFFLPDEGK	5 4 2 0 1	(N(N(H(H(N(H(A))))(H(N(F)(H(A)))))))	sp|P01009|A1AT_HUMAN	271
GTGJDTVLNVALLNVISNQECNIK	5 4 2 0 1	(N(F)(N(H(H(N(H(A))))(H(N(H(A)))))))	sp|Q2TV78|MST1L_HUMAN/sp|P26927|HGFL_HUMAN	619/615
VLYLAAYJCTLRPVSK	5 4 1 0 0	(N(N(H(H(N(H)))(H(N(H(A)))))))	sp|Q9UGM5|FETUB_HUMAN	136
IADAHLDRVEJTTVYYLVLDVQESDCSVLSR	5 4 2 0 0	(N(N(H(H(N(H(A))))(H(N(H(A)))))))	sp|P04196|HRG_HUMAN	63
JISDGFDGIPDNVDAALALPAHSYSGR	6 5 3 0 0	(N(N(H(H(N(H(A))))(H(N(H(A)))(N(H(A)))))))	sp|P04004|VTNC_HUMAN	242
LQAPLJYTEFQKPICLPSK	5 4 2 0 0	(N(N(H(H(N(H(A))))(H(N(H(A)))))))	sp|P03952|KLKB1_HUMAN	494
VLSJNSDANLELINTWVAK	5 4 2 0 0	(N(N(H(H(N(H(A))))(H(N(H(A)))))))	sp|P05155|IC1_HUMAN	253
EHEGAIYPDJTTDFQR	6 5 3 0 1	(N(F)(N(H(H(N(H(A))))(H(N(H(A)))(N(H(A)))))))	sp|P00450|CERU_HUMAN	138
LSDLSIJSTECLHVHCR	5 4 2 0 0	(N(N(H(H(N(H(A))))(H(N(H(A)))))))	sp|P05156|CFAI_HUMAN	177
QDQCIYJTTYLNVQR	3 3 1 0 0	(N(N(H(H(N(H(A)))))))	sp|P02763|A1AG1_HUMAN	93
AALAAFNAQNJGSNFQLEEISR	6 5 2 0 2	(N(F)(N(H(H(N(H)(F)))(H(N(H(A)))(N(H(A)))))))	sp|P02765|FETUA_HUMAN	176
LSLHRPALEDLLLGSEAJLTCTLTGLR	4 5 1 0 0	(N(N(H(H(N)(N))(H(N(H(A)))))))	sp|P01876|IGHA1_HUMAN/sp|P0DOX2|IGA2_HUMAN/sp|P01877|IGHA2_HUMAN	144/246/131
VDKDLQSLEDILHQVEJK	5 4 2 0 0	(N(N(H(H(N(H(A))))(H(N(H(A)))))))	sp|P02679|FIBG_HUMAN	78
VIDFJCTTSSVSSALANTK	5 3 1 0 0	(N(N(H(H(H))(H(N(H(A)))))))	sp|P04196|HRG_HUMAN	125
VVLHPJYSQVDIGLIK	6 5 3 0 1	(N(N(H(H(N(F)(H(A))))(H(N(H(A)))(N(H(A)))))))	sp|P00738|HPT_HUMAN	241
JISDGFDGIPDNVDAALALPAHSYSGR	5 4 2 0 1	(N(N(H(H(N(H(A))))(H(N(F)(H(A)))))))	sp|P04004|VTNC_HUMAN	242
MVSHHJLTTGATLINEQWLLTTAK	6 5 2 0 3	(N(N(H(N)(H(N(F)(H(H))))(H(N(F)(H(F)(A(A))))))))	sp|P00739|HPTR_HUMAN/sp|P00738|HPT_HUMAN	126/184
LGACJDTLQQLMEVFK	5 4 2 0 0	(N(N(H(H(N(H(A))))(H(N(H(A)))))))	sp|P01008|ANT3_HUMAN	128
KKKEDALJETR	6 5 3 0 0	(N(N(H(H(N(H(A))))(H(N(H(A)))(N(H(A)))))))	sp|P10909|CLUS_HUMAN	86
PALEDLLLGSEAJLTCTLTGLR	3 5 0 0 0	(N(N(H(H(N))(H(N)(N)))))	sp|P01876|IGHA1_HUMAN/sp|P0DOX2|IGA2_HUMAN/sp|P01877|IGHA2_HUMAN	144/246/131
JWSLPNR	5 4 1 0 1	(N(F)(N(H(H(N(H)))(H(N(H(A)))))))	sp|P55058|PLTP_HUMAN	245
MVSHHJLTTGATLINEQWLLTTAK	5 4 2 0 1	(N(F)(N(H(H(N(H(A))))(H(N(H(A)))))))	sp|P00739|HPTR_HUMAN/sp|P00738|HPT_HUMAN	126/184
JTSLVTIFMIWNTMMGTSILSIPWGIK	6 2 0 0 0	(N(N(H(H(H))(H(H)(H)))))	sp|Q8NBW4|S38A9_HUMAN	117
SLGNVJFTVSAEALESQELCGTEVPSVPEHGR	5 2 0 0 0	(N(N(H(H(H))(H(H)))))	sp|P01023|A2MG_HUMAN	869
ELHHLQEQJVSNAFLDKGEFYIGSK	7 6 4 0 1	(N(N(H(H(N(H(A)))(N(H(A))))(H(N(H(A)))(N(F)(H(A)))))))	sp|P00450|CERU_HUMAN	762
GLKFJLTETSEAEIHQSFQHLLR	7 6 4 0 1	(N(N(H(H(N(H(A)))(N(H(A))))(H(N(H(A)))(N(F)(H(A)))))))	sp|P01011|AACT_HUMAN	106
EIEEJSTLPNSFGFNY	6 3 2 0 1	(N(N(H(H(H)(H))(H(N(F)(H(A(A))))))))	sp|Q9Y5E1|PCDB9_HUMAN	786
VGQLQLSHJLSLVILVPQNLK	5 4 2 0 0	(N(N(H(H(N(H(A))))(H(N(H(A)))))))	sp|P05155|IC1_HUMAN	352
ALPQPQJVTSLLGCTH	6 5 2 0 0	(N(N(H(H(N(H(A))))(H(N(H))(N(H(A)))))))	sp|P02790|HEMO_HUMAN	453
LLHALGGDDFLGMLJR	5 4 1 0 0	(N(N(H(H(N(H)))(H(N(H(A)))))))	sp|Q9UHG3|PCYOX_HUMAN	196
KKEDALJETR	5 4 2 0 0	(N(N(H(H(N(H(A))))(H(N(H(A)))))))	sp|P10909|CLUS_HUMAN	86
YLGJATAIFFLPDEGK	6 5 3 0 1	(N(N(H(H(N(F)(H(A))))(H(N(H(A)))(N(H(A)))))))	sp|P01009|A1AT_HUMAN	271
QQQHLFGSJVTDCSGJFCLFR	5 4 1 0 0	(N(N(H(H(N(H)))(H(N(H(A)))))))	sp|P02787|TRFE_HUMAN	630
JISDGFDGIPDNVDAALALPAHSYSGR	6 5 3 0 2	(N(F)(N(H(H(N(F)(H(A))))(H(N(H(A)))(N(H(A)))))))	sp|P04004|VTNC_HUMAN	242
EJLTAPGSDSAVFFEQGTTR	6 5 3 0 1	(N(N(H(H(N(F)(H(A))))(H(N(H(A)))(N(H(A)))))))	sp|P00450|CERU_HUMAN	397
VSJQTLSLFFTVLQDVPVR	5 4 1 0 0	(N(N(H(H(N(H)))(H(N(H(A)))))))	sp|P01023|A2MG_HUMAN	1424
LEPVHLQLQCMSQEQLAQVAAJATK	5 4 2 0 0	(N(N(H(H(N(H(A))))(H(N(H(A)))))))	sp|Q96PD5|PGRP2_HUMAN	367
NJATVHEQVGGPSLTSDLQAQSK	6 5 3 0 0	(N(N(H(H(N(H(A))))(H(N(H(A)))(N(H(A)))))))	sp|P04004|VTNC_HUMAN	86
IQSPLFTLDANADIGJGTTSANEAGIAASITAK	5 4 2 0 0	(N(N(H(H(N(H(A))))(H(N(H(A)))))))	sp|P04114|APOB_HUMAN	2779
EHEAQSJASLDVFLGHTNVEELMK	5 4 2 0 0	(N(N(H(H(N(H(A))))(H(N(H(A)))))))	sp|P00736|C1R_HUMAN	514
KHSJETEFHKKEHK	5 4 2 0 0	(N(N(H(H(N(H(A))))(H(N(H(A)))))))	sp|Q5SVQ8|ZBT41_HUMAN	413
ADTHDEILEGLNFJLTEIPEAQIHEGFQELLR	5 4 1 0 2	(N(N(H(H(N(H)(F)))(H(N(F)(H(A)))))))	sp|P01009|A1AT_HUMAN	107
SVQEIQATFFYFTPJKTEDTIFLR	7 6 3 0 2	(N(N(H(H(N(H)(F))(N(H(A))))(H(N(H(A)))(N(F)(H(A)))))))	sp|P02763|A1AG1_HUMAN/sp|P19652|A1AG2_HUMAN	72/72
YLGJATAIFFLPDEGKLQHLENELTHDIITK	5 4 2 0 0	(N(N(H(H(N(H(A))))(H(N(H(A)))))))	sp|P01009|A1AT_HUMAN	271
TLJQSSDELQLSMGNAMFVK	6 5 2 0 1	(N(N(H(H(N(H)(F)))(H(N(H(A)))(N(H(A)))))))	sp|P01011|AACT_HUMAN	127
EHEGAIYPDJTTDFQR	5 4 2 0 0	(N(N(H(H)(H(N(H(A)))(N(H(A)))))))	sp|P00450|CERU_HUMAN	138
QJQCFYJSSYLNVQR	7 6 4 0 1	(N(N(H(H(N(H(A)))(N(H(A))))(H(N(H(A)))(N(F)(H(A)))))))	sp|P19652|A1AG2_HUMAN	88
MVSHHJLTTGATLINEQWLLTTAK	6 4 2 0 0	(N(N(H(H(N(H(A))))(H(N(H(H)(A)))))))	sp|P00739|HPTR_HUMAN/sp|P00738|HPT_HUMAN	126/184
EGDHEFLEVPEAQEDVEATFPVHQPGJYSCSYR	5 4 2 0 0	(N(N(H(H(N(H(A))))(H(N(H(A)))))))	sp|P04217|A1BG_HUMAN	179
REGDHEFLEVPEAQEDVEATFPVHQPGJYSCSYR	6 5 3 0 0	(N(N(H(H(N(H(A))))(H(N(H(A)))(N(H(A)))))))	sp|P04217|A1BG_HUMAN	179
VVLHPJYSQVDIGLIK	7 6 4 0 0	(N(N(H(H(N(H(A)))(N(H(A))))(H(N(H(A)))(N(H(A)))))))	sp|P00738|HPT_HUMAN	241
MVSHHJLTTGATLINEQWLLTTAK	6 4 2 0 0	(N(N(H(H(H))(H(N(H(A)))(N(H(A)))))))	sp|P00739|HPTR_HUMAN/sp|P00738|HPT_HUMAN	126/184
SVQEIQATFFYFTPJKTEDTIFLR	7 6 2 0 2	(N(N(H(H(N(H)(F))(N(H(A))))(H(N(H)(F))(N(H(A)))))))	sp|P02763|A1AG1_HUMAN/sp|P19652|A1AG2_HUMAN	72/72
QLAHQSJSTNIFFSPVSIATAFAMLSLGTK	5 4 1 0 0	(N(N(H(H(H))(H(N)(N(H(A)))))))	sp|P01009|A1AT_HUMAN	70
TYNVLDMKJTTCQDLQIEVTVK	5 4 2 0 0	(N(N(H(H(N(H(A))))(H(N(H(A)))))))	sp|P0C0L4|CO4A_HUMAN/sp|P0C0L5|CO4B_HUMAN	1391/1391
VSJQTLSLFFTVLQDVPVR	6 5 3 0 1	(N(N(H(H(N(F)(H(A))))(H(N(H(A)))(N(H(A)))))))	sp|P01023|A2MG_HUMAN	1424
VVLHPJYSQVDIGLIK	6 4 1 0 0	(N(N(H(H(H))(H(N(H))(N(H(A)))))))	sp|P00738|HPT_HUMAN	241
VVLHPJYSQVDIGLIK	7 6 4 0 1	(N(N(H(H(N(H(A)))(N(H(A))))(H(N(H(A)))(N(F)(H(A)))))))	sp|P00738|HPT_HUMAN	241
IJGTWNGMIGEVVMK	5 6 1 0 0	(N(N(H(H(N)(N(H)))(H(N)(N(H(A)))))))	sp|Q13224|NMDE2_HUMAN	491
LAGKPTHVJVSVVMAEVDGTCY	5 5 2 0 1	(N(F)(N(H(N)(H(N(H(A))))(H(N(H(A)))))))	sp|P01876|IGHA1_HUMAN	340
MVSHHJLTTGATLINEQWLLTTAK	6 5 3 0 1	(N(N(H(H(N(F)(H(A))))(H(N(H(A)))(N(H(A)))))))	sp|P00739|HPTR_HUMAN/sp|P00738|HPT_HUMAN	126/184
VLSJNSDANLELINTWVAK	5 4 2 0 1	(N(F)(N(H(H(N(H(A))))(H(N(H(A)))))))	sp|P05155|IC1_HUMAN	253
VTELQLTSSELDFQPQQELMLQITJASLGLR	5 4 1 0 1	(N(F)(N(H(H(N(H)))(H(N(H(A)))))))	sp|P55058|PLTP_HUMAN	94
GLKFJLTETSEAEIHQSFQHLLR	7 6 4 0 0	(N(N(H(H(N(H(A)))(N(H(A))))(H(N(H(A)))(N(H(A)))))))	sp|P01011|AACT_HUMAN	106
ENKQGWQNSIRHJLSLJK	5 4 2 0 0	(N(N(H(H(N(H(A))))(H(N(H(A)))))))	sp|P55316|FOXG1_HUMAN	236
JTSLVTIFMIWNTMMGTSILSIPWGIK	5 2 0 0 0	(N(N(H(H(H(H(H)))))))	sp|Q8NBW4|S38A9_HUMAN	117
LDGSJK	5 4 1 0 2	(N(N(H(H(N(H)(F)))(H(N(F)(H(A)))))))	sp|Q96IV0|NGLY1_HUMAN	117
SLGNVJFTVSAEALESQELCGTEVPSVPEHGR	5 2 0 0 0	(N(N(H(H(H)(H(H))))))	sp|P01023|A2MG_HUMAN	869
QDQCIYJTTYLNVQR	6 5 2 0 1	(N(N(H(H(N(H)(F)))(H(N(H(A)))(N(H(A)))))))	sp|P02763|A1AG1_HUMAN	93
VVLHPJYSQVDIGLIK	6 4 1 0 1	(N(N(H(H(N(H(H))))(H(N(F)(H(A)))))))	sp|P00738|HPT_HUMAN	241
SVQEIQATFFYFTPJK	7 6 3 0 0	(N(N(H(H(N(H))(N(H(A))))(H(N(H(A)))(N(H(A)))))))	sp|P02763|A1AG1_HUMAN/sp|P19652|A1AG2_HUMAN	72/72
GTAGNALMDGASQLMGEJR	4 4 1 0 0	(N(N(H(H(N))(H(N(H(A)))))))	sp|P02675|FIBB_HUMAN	394
SVQEIQATFFYFTPJK	6 5 3 0 0	(N(N(H(H(N(H(A))))(H(N(H(A)))(N(H(A)))))))	sp|P02763|A1AG1_HUMAN/sp|P19652|A1AG2_HUMAN	72/72
ADTHDEILEGLNFJLTEIPEAQIHEGFQELLR	6 5 2 0 1	(N(N(H(H(N(H)(F)))(H(N(H(A)))(N(H(A)))))))	sp|P01009|A1AT_HUMAN	107
QLAHQSJSTNIFFSPVSIATAFAMLSLGTK	6 5 3 0 1	(N(N(H(H(N(F)(H(A))))(H(N(H(A)))(N(H(A)))))))	sp|P01009|A1AT_HUMAN	70
YTGJASALFILPDQDKMEEVEAMLLPETLKR	6 5 3 0 1	(N(N(H(H(N(F)(H(A))))(H(N(H(A)))(N(H(A)))))))	sp|P01011|AACT_HUMAN	271
ADTHDEILEGLNFJLTEIPEAQIHEGFQELLR	7 6 3 0 0	(N(N(H(H(N(H))(N(H(A))))(H(N(H(A)))(N(H(A)))))))	sp|P01009|A1AT_HUMAN	107
KYNSQJQSNNQFVLYR	6 5 3 0 0	(N(N(H(H(N(H(A))))(H(N(H(A)))(N(H(A)))))))	sp|P01042|KNG1_HUMAN	48
TLJQSSDELQLSMGNAMFVK	6 5 2 0 0	(N(N(H(H(N(H(A))))(H(N(H))(N(H(A)))))))	sp|P01011|AACT_HUMAN	127
QQQHLFGSJVTDCSGJFCLFR	6 5 3 0 1	(N(F)(N(H(H(N(H(A))))(H(N(H(A)))(N(H(A)))))))	sp|P02787|TRFE_HUMAN	630
DILLLGNNYVIHRJSCEVEISRVANR	5 2 0 0 0	(N(N(H(H(H)(H(H))))))	sp|Q14541|HNF4G_HUMAN	206
FJLTETSEAEIHQSFQHLLR	7 6 4 0 1	(N(N(H(H(N(H(A)))(N(H(A))))(H(N(H(A)))(N(F)(H(A)))))))	sp|P01011|AACT_HUMAN	106
RNPPMGGNVVIFDTVITNQEEPYQJHSGR	5 4 2 0 1	(N(F)(N(H(H(N(H(A))))(H(N(H(A)))))))	sp|P02745|C1QA_HUMAN	146
KAFITJFSMIIDGMTYPGIIK	5 4 2 0 0	(N(N(H(H(N(H(A))))(H(N(H(A)))))))	sp|Q14624|ITIH4_HUMAN	81
VNQNLVYESGSLJFSKLEIQSQVDSQHVGHSVLTAK	5 4 2 0 0	(N(N(H(H(N(H(A))))(H(N(H(A)))))))	sp|P04114|APOB_HUMAN	2982
PALEDLLLGSEAJLTCTLTGLR	4 5 1 0 0	(N(N(H(N)(H(N(H))(N(H(A)))))))	sp|P01876|IGHA1_HUMAN/sp|P0DOX2|IGA2_HUMAN/sp|P01877|IGHA2_HUMAN	144/246/131
VVLHPJYSQVDIGLIK	7 6 2 0 0	(N(N(H(H(N(H))(N(H(A))))(H(N(H))(N(H(A)))))))	sp|P00738|HPT_HUMAN	241
VVLHPJYSQVDIGLIK	6 5 3 0 2	(N(F)(N(H(H(N(F)(H(A))))(H(N(H(A)))(N(H(A)))))))	sp|P00738|HPT_HUMAN	241
VVJSTTGPGEHLR	5 4 1 0 0	(N(N(H(H(N(H)))(H(N(H(A)))))))	sp|P07996|TSP1_HUMAN	1067
QDQCIYJTTYLNVQR	7 6 2 0 0	(N(N(H(H(N(H))(N(H(A))))(H(N(H))(N(H(A)))))))	sp|P02763|A1AG1_HUMAN	93
QJQCFYJSSYLNVQR	7 6 4 0 0	(N(N(H(H(N(H(A)))(N(H(A))))(H(N(H(A)))(N(H(A)))))))	sp|P19652|A1AG2_HUMAN	88
AVJITSENLIDDVVSLIR	6 5 3 0 0	(N(N(H(H(N(H(A))))(H(N(H(A)))(N(H(A)))))))	sp|P02748|CO9_HUMAN	415
STGKPTLYJVSLVMSDTAGTCY	9 2 0 0 0	(N(N(H(H(H(H)))(H(H)(H(H)(H))))))	sp|P0DOX6|IGM_HUMAN/sp|P01871|IGHM_HUMAN	563/440
GCVLLSYLJETVTVSASLESVR	6 5 2 0 0	(N(N(H(H(N(H(A))))(H(N(H))(N(H(A)))))))	sp|P01023|A2MG_HUMAN	55
QQQHLFGSJVTDCSGJFCLFR	6 5 3 0 1	(N(N(H(H(N(F)(H(A))))(H(N(H(A)))(N(H(A)))))))	sp|P02787|TRFE_HUMAN	630
LPTQJITFQTESSVAEQEAEFQSPK	5 4 2 0 0	(N(N(H(H(N(H(A))))(H(N(H(A)))))))	sp|Q14624|ITIH4_HUMAN	517
FJSSYLQGTNQITGR	5 4 2 0 0	(N(N(H(H(N(H(A))))(H(N(H(A)))))))	sp|P04114|APOB_HUMAN	1523
SLGNVJFTVSAEALESQELCGTEVPSVPEHGR	5 2 0 0 0	(N(N(H(H)(H(H(H))))))	sp|P01023|A2MG_HUMAN	869
QDQCIYJTTYLNVQR	7 6 4 0 1	(N(F)(N(H(H(N(H(A(N(H(A)))))))(H(N(H(A(N(H(A))))))))))	sp|P02763|A1AG1_HUMAN	93
FVEGSHJSTVSLTTK	5 3 1 0 0	(N(N(H(H(H))(H(N(H(A)))))))	sp|P04114|APOB_HUMAN	3411
VSJQTLSLFFTVLQDVPVR	4 4 1 0 0	(N(N(H(H(N))(H(N(H(A)))))))	sp|P01023|A2MG_HUMAN	1424
EJLTAPGSDSAVFFEQGTTR	5 4 2 0 1	(N(N(H(H(N(H(A))))(H(N(F)(H(A)))))))	sp|P00450|CERU_HUMAN	397
VIDFJCTTSSVSSALANTK	5 2 0 0 0	(N(N(H(H)(H(H(H))))))	sp|P04196|HRG_HUMAN	125
SVQEIQATFFYFTPJKTEDTIFLR	7 6 2 0 1	(N(N(H(H(N(H))(N(H(A))))(H(N(H)(F))(N(H(A)))))))	sp|P02763|A1AG1_HUMAN/sp|P19652|A1AG2_HUMAN	72/72
SVQEIQATFFYFTPJKTEDTIFLR	7 6 3 0 3	(N(F)(N(H(H(N(H(A)))(N(H(A))))(H(N(H)(F))(N(F)(H(A)))))))	sp|P02763|A1AG1_HUMAN/sp|P19652|A1AG2_HUMAN	72/72
FJLTETSEAEIHQSFQHLLR	7 6 4 0 0	(N(N(H(H(N(H(A)))(N(H(A))))(H(N(H(A)))(N(H(A)))))))	sp|P01011|AACT_HUMAN	106
VGQLQLSHJLSLVILVPQNLK	5 4 1 0 0	(N(N(H(H(N(H)))(H(N(H(A)))))))	sp|P05155|IC1_HUMAN	352
JTTCQDLQIEVTVK	5 4 2 0 0	(N(N(H(H(N(H(A))))(H(N(H(A)))))))	sp|P0C0L4|CO4A_HUMAN/sp|P0C0L5|CO4B_HUMAN	1391/1391
SEGSSVJLSPPLEQCVPDR	5 4 2 0 0	(N(N(H(H(N(H(A))))(H(N(H(A)))))))	sp|P00734|THRB_HUMAN	205
EPTTJICVFADEQVDR	5 4 1 0 0	(N(N(H(H(N(H)))(H(N(H(A)))))))	sp|Q96EM0|T3HPD_HUMAN	259
VVLHPJYSQVDIGLIK	6 5 3 0 2	(N(N(H(H(N(H(A))))(H(N(F)(H(A)))(N(F)(H(A)))))))	sp|P00738|HPT_HUMAN	241
QDQCIYJTTYLNVQR	7 6 1 0 0	(N(N(H(H(N(H))(N(H)))(H(N(H))(N(H(A)))))))	sp|P02763|A1AG1_HUMAN	93
VTQVYAEJGTVLQGSTVASVYK	6 5 3 0 0	(N(N(H(H(N(H(A))))(H(N(H(A)))(N(H(A)))))))	sp|P27169|PON1_HUMAN	324
LSLHRPALEDLLLGSEAJLTCTLTGLR	4 3 1 0 0	(N(N(H(H)(H(N(H(A)))))))	sp|P01876|IGHA1_HUMAN/sp|P0DOX2|IGA2_HUMAN/sp|P01877|IGHA2_HUMAN	144/246/131
PYSIYPHGVTFSPYEDEVJSSFTSGR	5 4 2 0 0	(N(N(H(H(N(H(A))))(H(N(H(A)))))))	sp|P12259|FA5_HUMAN	460
SLTFJETYQDISELVYGAK	6 3 1 0 0	(N(N(H(H)(H(H)(H(N(H(A))))))))	sp|P01008|ANT3_HUMAN	187
IIVPLNNREJISDPTSPLR	5 4 1 0 1	(N(F)(N(H(H(N(H)))(H(N(H(A)))))))	sp|P01591|IGJ_HUMAN	71
FJSSYLQGTNQITGR	4 3 1 0 0	(N(N(H(H)(H(N(H(A)))))))	sp|P04114|APOB_HUMAN	1523
DIVEYYJDSJGSHVLQGR	5 4 2 0 0	(N(N(H(H(N(H(A))))(H(N(H(A)))))))	sp|P25311|ZA2G_HUMAN	109
RNPPMGGNVVIFDTVITNQEEPYQJHSGR	5 4 1 0 1	(N(F)(N(H(H(N(H)))(H(N(H(A)))))))	sp|P02745|C1QA_HUMAN	146
YDFJSSMLYSTAK	5 4 1 0 0	(N(N(H(H(N(H)))(H(N(H(A)))))))	sp|P04114|APOB_HUMAN	3465
FEVDSPVYJATWSASLK	6 5 2 0 0	(N(N(H(H(N(H(A))))(H(N(H))(N(H(A)))))))	sp|P04114|APOB_HUMAN	3895
QQQHLFGSJVTDCSGJFCLFR	5 4 2 0 1	(N(F)(N(H(H(N(H(A))))(H(N(H(A)))))))	sp|P02787|TRFE_HUMAN	630
MDGASJVTCINSR	5 4 2 0 0	(N(N(H(H(N(H(A))))(H(N(H(A)))))))	sp|P08603|CFAH_HUMAN	1029
EJGTISR	5 4 2 0 0	(N(N(H(H(N(H(A))))(H(N(H(A)))))))	sp|P02763|A1AG1_HUMAN	103
VLYLAAYJCTLRPVSK	5 4 2 0 0	(N(N(H(H(N(H(A))))(H(N(H(A)))))))	sp|Q9UGM5|FETUB_HUMAN	136
GLTFQQJASSMCVPDQDTAIR	5 5 1 0 1	(N(N(H(H(N(F)))(H(N(H))(N(H(A)))))))	sp|P0DOX6|IGM_HUMAN/sp|P01871|IGHM_HUMAN	332/209
IYPGVDFGGEELJVTFVK	5 4 2 0 0	(N(N(H(H(N(H(A))))(H(N(H(A)))))))	sp|P03952|KLKB1_HUMAN	308
VSJQTLSLFFTVLQDVPVR	6 5 3 0 1	(N(F)(N(H(H(N(H(A))))(H(N(H(A)))(N(H(A)))))))	sp|P01023|A2MG_HUMAN	1424
SVQEIQATFFYFTPJKTEDTIFLR	6 5 3 0 0	(N(N(H(N(H(A)))(H(N(H(A))))(H(N(H(A)))))))	sp|P02763|A1AG1_HUMAN/sp|P19652|A1AG2_HUMAN	72/72
STGKPTLYJVSLVMSDTAGTCY	6 2 0 0 0	(N(N(H(H)(H(H)(H)(H)))))	sp|P0DOX6|IGM_HUMAN/sp|P01871|IGHM_HUMAN	563/440
IVGGTJSSWGEWPWQVSLQVK	5 4 2 0 0	(N(N(H(H(N(H(A))))(H(N(H(A)))))))	sp|P03952|KLKB1_HUMAN	396
LSLHRPALEDLLLGSEAJLTCTLTGLR	5 5 1 0 0	(N(N(H(H(N)(N(H)))(H(N(H(A)))))))	sp|P01876|IGHA1_HUMAN/sp|P0DOX2|IGA2_HUMAN/sp|P01877|IGHA2_HUMAN	144/246/131
MVSHHJLTTGATLINEQWLLTTAK	5 4 2 0 0	(N(N(H(H)(H(N(H(A)))(N(H(A)))))))	sp|P00739|HPTR_HUMAN/sp|P00738|HPT_HUMAN	126/184
VLSJNSDANLELINTWVAK	6 5 3 0 2	(N(F)(N(H(H(N(F)(H(A))))(H(N(H(A)))(N(H(A)))))))	sp|P05155|IC1_HUMAN	253
FVEGSHJSTVSLTTK	4 3 1 0 0	(N(N(H(H)(H(N(H(A)))))))	sp|P04114|APOB_HUMAN	3411
GCVLLSYLJETVTVSASLESVR	5 4 2 0 1	(N(F)(N(H(H)(H(N(H(A)))(N(H(A)))))))	sp|P01023|A2MG_HUMAN	55
QVETIRNLVDSYMSIIJK	4 3 0 0 0	(N(N(H(H)(H(N(H))))))	sp|Q9UQ16|DYN3_HUMAN	674
QQQHLFGSJVTDCSGJFCLFR	5 4 2 0 1	(N(N(H(H(N(H(A))))(H(N(F)(H(A)))))))	sp|P02787|TRFE_HUMAN	630
KNAHGEEKEJLTAR	6 5 3 0 0	(N(N(H(H(N(H(A))))(H(N(H(A)))(N(H(A)))))))	sp|Q06033|ITIH3_HUMAN	580
QGGVJATQVLIQHLR	5 4 2 0 0	(N(N(H(H(N(H(A))))(H(N(H(A)))))))	sp|Q13790|APOF_HUMAN	118
VDKDLQSLEDILHQVEJK	5 4 0 0 0	(N(N(H(H(N(H)))(H(N(H))))))	sp|P02679|FIBG_HUMAN	78
STGKPTLYJVSLVMSDTAGTCY	8 2 0 0 0	(N(N(H(H)(H(H)(H(H(H(H))))))))	sp|P0DOX6|IGM_HUMAN/sp|P01871|IGHM_HUMAN	563/440
YKJNSDISSTR	5 4 2 0 1	(N(F)(N(H(H(N(H(A))))(H(N(H(A)))))))	sp|P01871|IGHM_HUMAN	46
QQQHLFGSJVTDCSGJFCLFR	6 5 3 0 0	(N(N(H(H(N(H(A))))(H(N(H(A)))(N(H(A)))))))	sp|P02787|TRFE_HUMAN	630
LPYQGJATMLVVLMEK	5 4 2 0 0	(N(N(H(H(N(H(A))))(H(N(H(A)))))))	sp|Q9UK55|ZPI_HUMAN	295
TLYETEVFSTDFSJISAAK	6 5 3 0 0	(N(N(H(H(N(H(A))))(H(N(H(A)))(N(H(A)))))))	sp|P05543|THBG_HUMAN	165
PALEDLLLGSEAJLTCTLTGLR	4 5 1 0 0	(N(N(H(H(N)(N))(H(N(H(A)))))))	sp|P01876|IGHA1_HUMAN/sp|P0DOX2|IGA2_HUMAN/sp|P01877|IGHA2_HUMAN	144/246/131
NVIFSPLSISTALAFLSLGAHJTTLTEILK	5 4 1 0 0	(N(N(H(H(N(H)))(H(N(H(A)))))))	sp|P01011|AACT_HUMAN	93
TELFSSSCPGGIMLJETGQGYQR	5 4 2 0 0	(N(N(H(H(N(H(A))))(H(N(H(A)))))))	sp|O95445|APOM_HUMAN	135
GLJVTLSSTGR	5 4 1 0 0	(N(N(H(H(N(H)))(H(N(H(A)))))))	sp|P0C0L4|CO4A_HUMAN/sp|P0C0L5|CO4B_HUMAN	1328/1328
KAFITJFSMIIDGMTYPGIIK	5 4 2 0 1	(N(N(H(H(N(H(A))))(H(N(F)(H(A)))))))	sp|Q14624|ITIH4_HUMAN	81
JLSMPLLPADFHK	6 5 3 0 1	(N(N(H(H(N(F)(H(A))))(H(N(H(A)))(N(H(A)))))))	sp|P05546|HEP2_HUMAN	49
TVLTPATNHMGJVTFTIPANR	6 3 1 0 0	(N(N(H(H)(H(H)(H(N(H(A))))))))	sp|P01024|CO3_HUMAN	85
SQILEGLGFJLTELSESDVHR	7 6 4 0 0	(N(N(H(H(N(H(A)))(N(H(A))))(H(N(H(A)))(N(H(A)))))))	sp|P29622|KAIN_HUMAN	108
AVJITSENLIDDVVSLIR	5 4 2 0 1	(N(F)(N(H(H(N(H(A))))(H(N(H(A)))))))	sp|P02748|CO9_HUMAN	415
HAJWTLTPLK	5 4 1 0 0	(N(N(H(H(N(H)))(H(N(H(A)))))))	sp|P27169|PON1_HUMAN	253
SVQEIQATFFYFTPJKTEDTIFLR	7 6 3 0 1	(N(N(H(H(N(H)(F))(N(H(A))))(H(N(H(A)))(N(H(A)))))))	sp|P02763|A1AG1_HUMAN/sp|P19652|A1AG2_HUMAN	72/72
SVQEIQATFFYFTPJKTEDTIFLR	7 6 2 0 0	(N(N(H(H(N(H))(N(H(A))))(H(N(H))(N(H(A)))))))	sp|P02763|A1AG1_HUMAN/sp|P19652|A1AG2_HUMAN	72/72
ADGTVNQIEGEATPVJLTEPAKLEVK	6 5 2 0 1	(N(F)(N(H(H(N(H(A))))(H(N(H(N(H(A)))))))))	sp|P05090|APOD_HUMAN	98
LAGKPTHVJVSVVMAEVDGTCY	5 5 1 0 1	(N(F)(N(H(N)(H(N(H)))(H(N(H(A)))))))	sp|P01876|IGHA1_HUMAN	340
ADGTVNQIEGEATPVJLTEPAKLEVK	6 5 1 0 0	(N(N(H(H(N(H(A))))(H(N(H))(N(H))))))	sp|P05090|APOD_HUMAN	98
TELFSSSCPGGIMLJETGQGYQR	5 3 1 0 0	(N(N(H(H(H))(H(N(H(A)))))))	sp|O95445|APOM_HUMAN	135
ALPQPQJVTSLLGCTH	5 4 2 0 1	(N(N(H(H(N(H(A))))(H(N(F)(H(A)))))))	sp|P02790|HEMO_HUMAN	453
NVIFSPLSISTALAFLSLGAHJTTLTEILK	5 4 2 0 1	(N(F)(N(H(H(N(H(A))))(H(N(H(A)))))))	sp|P01011|AACT_HUMAN	93
SIPACVPWSPYLFQPJDTCIVSGWGR	5 4 2 0 0	(N(N(H(H(N(H(A))))(H(N(H(A)))))))	sp|P05156|CFAI_HUMAN	464
EVFVHPJYSK	5 4 2 0 0	(N(N(H(H(N(H(A))))(H(N(H(A)))))))	sp|P04070|PROC_HUMAN	290
VVLHPJYSQVDIGLIK	6 5 2 0 1	(N(N(H(H(N(H)(F)))(H(N(H(A)))(N(H(A)))))))	sp|P00738|HPT_HUMAN	241
AJLSSQALQMSLDYGFVTPLTSMSIR	5 4 1 0 2	(N(N(H(H(N(H)(F)))(H(N(F)(H(A)))))))	sp|P19827|ITIH1_HUMAN	588
GTAGNALMDGASQLMGEJR	5 4 0 0 0	(N(N(H(H(H))(H(N)(N(H))))))	sp|P02675|FIBB_HUMAN	394
YKJNSDISSTR	5 5 1 0 0	(N(N(H(N)(H(N(H)))(H(N(H(A)))))))	sp|P01871|IGHM_HUMAN	46
PSTGTGVMLALVSGJNTVPFAVSLVDSTSEK	5 4 2 0 0	(N(N(H(H(N(H(A))))(H(N(H(A)))))))	sp|P07225|PROS_HUMAN	530
JVTAEQAR	5 4 2 0 1	(N(F)(N(H(H(N(H(A))))(H(N(H(A)))))))	sp|P00748|FA12_HUMAN	249
YLGJATAIFFLPDEGK	6 5 3 0 0	(N(N(H(H(N(H(A))))(H(N(H(A)))(N(H(A)))))))	sp|P01009|A1AT_HUMAN	271
GCJDSDVLAVAGFALR	5 4 2 0 0	(N(N(H(H(N(H(A))))(H(N(H(A)))))))	sp|Q9UGM5|FETUB_HUMAN	37
VELEDFNGJR	5 4 2 0 1	(N(F)(N(H(H(N(H(A))))(H(N(H(A)))))))	sp|O75636|FCN3_HUMAN	189
VSJQTLSLFFTVLQDVPVR	5 4 2 0 1	(N(F)(N(H(H(N(H(A))))(H(N(H(A)))))))	sp|P01023|A2MG_HUMAN	1424
KKKEDALJETR	6 5 3 0 1	(N(N(H(H(N(F)(H(A))))(H(N(H(A)))(N(H(A)))))))	sp|P10909|CLUS_HUMAN	86
QLAHQSJSTNIFFSPVSIATAFAMLSLGTK	6 5 1 0 0	(N(N(H(H(N(H(A))))(H(N(H))(N(H))))))	sp|P01009|A1AT_HUMAN	70
DILLLGNNYVIHRJSCEVEISRVANR	5 2 0 0 0	(N(N(H(H)(H(H(H))))))	sp|Q14541|HNF4G_HUMAN	206
AQKMJDTIFGFTMEER	5 4 2 0 0	(N(N(H(H)(H(N(H(A)))(N(H(A)))))))	sp|P20061|TCO1_HUMAN	369
INNDFNYEFYJSTWSYVK	6 3 1 0 0	(N(N(H(H)(H(H)(H(N(H(A))))))))	sp|P10643|CO7_HUMAN	202
EJGTISR	6 5 3 0 0	(N(N(H(H(N(H(A))))(H(N(H(A)))(N(H(A)))))))	sp|P02763|A1AG1_HUMAN	103
DIVEYYJDSJGSHVLQGR	5 4 2 0 1	(N(F)(N(H(H(N(H(A))))(H(N(H(A)))))))	sp|P25311|ZA2G_HUMAN	109
QJQCFYJSSYLNVQR	6 5 3 0 0	(N(N(H(H(N(H(A))))(H(N(H(A)))(N(H(A)))))))	sp|P19652|A1AG2_HUMAN	88
FSLLGHASISCTVEJETIGVWRPSPPTCEK	6 5 3 0 0	(N(N(H(H(N(H(A))))(H(N(H(A)))(N(H(A)))))))	sp|P04003|C4BPA_HUMAN	221
QMAQJNSR	5 4 2 0 0	(N(N(H(H(N(H(A))))(H(N(H(A)))))))	sp|Q86YD3|TMM25_HUMAN	324
SLGNVJFTVSAEALESQELCGTEVPSVPEHGR	4 3 0 0 0	(N(N(H(H)(H(N(H))))))	sp|P01023|A2MG_HUMAN	869
YKJNSDISSTR	5 4 1 0 1	(N(F)(N(H(H(N(H)))(H(N(H(A)))))))	sp|P01871|IGHM_HUMAN	46
DTFVJASR	5 4 1 0 0	(N(N(H(H(N(H)))(H(N(H(A)))))))	sp|P05155|IC1_HUMAN	238
GLTFQQJASSMCVPDQDTAIR	5 4 2 0 1	(N(F)(N(H(H(N(H(A))))(H(N(H(A)))))))	sp|P0DOX6|IGM_HUMAN/sp|P01871|IGHM_HUMAN	332/209
LGJWSAMPSCK	5 4 2 0 0	(N(N(H(H(N(H(A))))(H(N(H(A)))))))	sp|P02749|APOH_HUMAN	253
YLGJATAIFFLPDEGK	6 4 2 0 1	(N(N(H(H(H))(H(N(H(A)))(N(F)(H(A)))))))	sp|P01009|A1AT_HUMAN	271
YTGJASALFILPDQDKMEEVEAMLLPETLKR	7 6 2 0 4	(N(N(H(H(N(H)(F))(N(F)(H(A))))(H(N(H)(F))(N(F)(H(A)))))))	sp|P01011|AACT_HUMAN	271
QDQCIYJTTYLNVQR	7 6 3 0 2	(N(N(H(H(N(H)(F))(N(H(A))))(H(N(H(A)))(N(F)(H(A)))))))	sp|P02763|A1AG1_HUMAN	93
AQLLQGLGFJLTER	6 5 3 0 0	(N(N(H(H(N(H(A))))(H(N(H(A)))(N(H(A)))))))	sp|P08185|CBG_HUMAN	96
ADTHDEILEGLNFJLTEIPEAQIHEGFQELLR	7 6 4 0 1	(N(N(H(H(N(H(A)))(N(H(A))))(H(N(H(A)))(N(F)(H(A)))))))	sp|P01009|A1AT_HUMAN	107
VVLHPJYSQVDIGLIK	8 7 3 0 0	(N(N(H(H(N(H))(N(H(A))))(H(N(H(A)))(N(H(N(H(A)))))))))	sp|P00738|HPT_HUMAN	241
GHVJITR	5 4 1 0 0	(N(N(H(H(N(H)))(H(N(H(A)))))))	sp|P00734|THRB_HUMAN	121
KJTSFMLK	4 4 1 0 2	(N(N(H(H(N(F)))(H(N(F)(H(A)))))))	sp|Q96PP4|TSG13_HUMAN	80
HJSTGCLR	3 3 1 0 0	(N(N(H(H(N(H(A)))))))	sp|P10909|CLUS_HUMAN	291
DJNSIITR	5 4 2 0 0	(N(N(H(H(N(H(A))))(H(N(H(A)))))))	sp|P06276|CHLE_HUMAN	369
FJLTETSEAEIHQSFQHLLR	7 6 4 0 2	(N(N(H(H(N(H(A)))(N(F)(H(A))))(H(N(H(A)))(N(F)(H(A)))))))	sp|P01011|AACT_HUMAN	106
MVSHHJLTTGATLINEQWLLTTAK	5 5 1 0 2	(N(N(H(N)(H(N(H)(F)))(H(N(F)(H(A)))))))	sp|P00739|HPTR_HUMAN/sp|P00738|HPT_HUMAN	126/184
SWPAVGJCSSALR	5 4 1 0 0	(N(N(H(H(N(H)))(H(N(H(A)))))))	sp|P02790|HEMO_HUMAN	187
PALEDLLLGSEAJLTCTLTGLR	5 2 0 0 0	(N(N(H(H(H(H(H)))))))	sp|P01876|IGHA1_HUMAN/sp|P0DOX2|IGA2_HUMAN/sp|P01877|IGHA2_HUMAN	144/246/131
MDJMSPRLR	5 4 2 0 0	(N(N(H(H(N(H(A))))(H(N(H(A)))))))	sp|Q9H503|BAFL_HUMAN	3
QVLFLDTVYGJCSTHFTVK	7 2 0 0 0	(N(N(H(H(H))(H(H)(H(H))))))	sp|P04114|APOB_HUMAN	185
NVIFSPLSISTALAFLSLGAHJTTLTEILK	7 6 4 0 1	(N(N(H(H(N(H(A)))(N(H(A))))(H(N(H(A)))(N(F)(H(A)))))))	sp|P01011|AACT_HUMAN	93
EEQFJSTFR	4 4 1 0 1	(N(F)(N(H(H(N(H))(N(H(A)))))))	sp|P01859|IGHG2_HUMAN	176
DIENFJSTQK	5 4 2 0 0	(N(N(H(H(N(H(A))))(H(N(H(A)))))))	sp|P43652|AFAM_HUMAN	33
VDKDLQSLEDILHQVEJK	4 3 0 0 0	(N(N(H(H)(H(N(H))))))	sp|P02679|FIBG_HUMAN	78
YKJNSDISSTR	5 5 2 0 1	(N(F)(N(H(N)(H(N(H(A))))(H(N(H(A)))))))	sp|P01871|IGHM_HUMAN	46
VCQDCPLLAPLJDTR	6 5 3 0 1	(N(N(H(H(N(F)(H(A))))(H(N(H(A)))(N(H(A)))))))	sp|P02765|FETUA_HUMAN	156
QDQCIYJTTYLNVQR	6 5 3 0 2	(N(N(H(H(N(F)(H(A))))(H(N(H(A)))(N(F)(H(A)))))))	sp|P02763|A1AG1_HUMAN	93
SVVAPATDGGLJLTSTFLR	5 4 2 0 1	(N(F)(N(H(H(N(H(A))))(H(N(H(A)))))))	sp|P41222|PTGDS_HUMAN	78
MVSHHJLTTGATLINEQWLLTTAK	7 6 3 0 0	(N(N(H(H(N(H))(N(H(A))))(H(N(H(A)))(N(H(A)))))))	sp|P00739|HPTR_HUMAN/sp|P00738|HPT_HUMAN	126/184
EJLTAPGSDSAVFFEQGTTR	6 5 2 0 1	(N(N(H(H(N(H)(F)))(H(N(H(A)))(N(H(A)))))))	sp|P00450|CERU_HUMAN	397
GVNFJVSK	5 4 1 0 0	(N(N(H(H(N(H)))(H(N(H(A)))))))	sp|P03952|KLKB1_HUMAN	127
NEEYJK	6 5 3 0 1	(N(F)(N(H(H(N(H(A))))(H(N(H(A)))(N(H(A)))))))	sp|P02763|A1AG1_HUMAN/sp|P19652|A1AG2_HUMAN	56/56
DILLLGNNYVIHRJSCEVEISRVANR	6 2 0 0 0	(N(N(H(H)(H(H)(H(H))))))	sp|Q14541|HNF4G_HUMAN	206
FJLTETSEAEIHQSFQHLLR	7 6 3 0 1	(N(N(H(H(N(H)(F))(N(H(A))))(H(N(H(A)))(N(H(A)))))))	sp|P01011|AACT_HUMAN	106
HJGTDR	5 4 2 0 0	(N(N(H(H(N(H(A))))(H(N(H(A)))))))	sp|Q92802|N42L2_HUMAN	382
HAJWTLTPLK	5 4 2 0 0	(N(N(H(H(N(H(A))))(H(N(H(A)))))))	sp|P27169|PON1_HUMAN	253
EDALJETR	6 5 3 0 0	(N(N(H(H(N(H(A))))(H(N(H(A)))(N(H(A)))))))	sp|P10909|CLUS_HUMAN	86
EJGTISR	7 6 3 0 0	(N(N(H(H(N(H))(N(H(A))))(H(N(H(A)))(N(H(A)))))))	sp|P02763|A1AG1_HUMAN	103
AALAAFNAQNJGSNFQLEEISR	6 5 2 0 0	(N(N(H(H(N(H(A))))(H(N(H))(N(H(A)))))))	sp|P02765|FETUA_HUMAN	176
HRGAFELAYTGFVKLTEVLJRCPJVSLQK	5 4 2 0 0	(N(N(H(H(N(H(A))))(H(N(H(A)))))))	sp|Q6YHU6|THADA_HUMAN	1124
YLGJATAIFFLPDEGK	4 4 1 0 0	(N(N(H(H(N))(H(N(H(A)))))))	sp|P01009|A1AT_HUMAN	271
QDQCIYJTTYLNVQR	6 5 3 0 0	(N(N(H(H(N(H(A))))(H(N(H(A)))(N(H(A)))))))	sp|P02763|A1AG1_HUMAN	93
VVLHPJYSQVDIGLIK	7 6 3 0 3	(N(N(H(H(N(H)(F))(N(F)(H(A))))(H(N(H(A)))(N(F)(H(A)))))))	sp|P00738|HPT_HUMAN	241
VVLHPJYSQVDIGLIK	7 6 4 0 2	(N(N(H(H(N(H(A)))(N(F)(H(A))))(H(N(H(A)))(N(F)(H(A)))))))	sp|P00738|HPT_HUMAN	241
YNSQJQSNNQFVLYR	6 5 3 0 0	(N(N(H(H(N(H(A))))(H(N(H(A)))(N(H(A)))))))	sp|P01042|KNG1_HUMAN	48
EDJISAK	5 4 1 0 2	(N(N(H(H(N(H)(F)))(H(N(F)(H(A)))))))	sp|Q8TDR0|MIPT3_HUMAN	360
EPSSLGSVGVTEIJK	5 4 2 0 0	(N(N(H(H(N(H(A))))(H(N(H(A)))))))	sp|A1L170|CA226_HUMAN	83
NSVLJSSTAEHSSPYSEDPIEDPLQPDVTGIR	5 4 2 0 0	(N(N(H(H(N(H(A))))(H(N(H(A)))))))	sp|P12259|FA5_HUMAN	821
SVQEIQATFFYFTPJKTEDTIFLR	7 6 4 0 1	(N(N(H(H(N(H(A)))(N(H(A))))(H(N(H(A)))(N(F)(H(A)))))))	sp|P02763|A1AG1_HUMAN/sp|P19652|A1AG2_HUMAN	72/72
GTGJDTVLNVALLNVISNQECNIK	5 4 2 0 0	(N(N(H(H(N(H(A))))(H(N(H(A)))))))	sp|Q2TV78|MST1L_HUMAN/sp|P26927|HGFL_HUMAN	619/615
AALAAFNAQNJGSNFQLEEISR	6 5 3 0 1	(N(N(H(H(N(F)(H(A))))(H(N(H(A)))(N(H(A)))))))	sp|P02765|FETUA_HUMAN	176
JGSLFAFR	6 3 1 0 0	(N(N(H(H)(H(H)(H(N(H(A))))))))	sp|P04004|VTNC_HUMAN	169
ELHHLQEQJVSNAFLDKGEFYIGSK	6 5 3 0 1	(N(N(H(H(N(F)(H(A))))(H(N(H(A)))(N(H(A)))))))	sp|P00450|CERU_HUMAN	762
QDQCIYJTTYLNVQR	8 7 3 0 0	(N(N(H(H(N(H))(N(H(A))))(H(N(H(A)))(N(H(N(H(A)))))))))	sp|P02763|A1AG1_HUMAN	93
YQFNTNVVFSNJGTLVDR	5 4 2 0 0	(N(N(H(H(N(H(A))))(H(N(H(A)))))))	sp|P43251|BTD_HUMAN	203
ALPQPQJVTSLLGCTH	4 3 1 0 0	(N(N(H(H)(H(N(H(A)))))))	sp|P02790|HEMO_HUMAN	453
HYTJSSQDVTVPCR	5 5 1 0 1	(N(F)(N(H(N)(H(N(H)))(H(N(H(A)))))))	sp|P0DOX2|IGA2_HUMAN/sp|P01877|IGHA2_HUMAN	207/92
PALEDLLLGSEAJLTCTLTGLR	5 4 2 0 0	(N(N(H(H(N(H(A))))(H(N(H(A)))))))	sp|P01876|IGHA1_HUMAN/sp|P0DOX2|IGA2_HUMAN/sp|P01877|IGHA2_HUMAN	144/246/131
FSDGLESJSSTQFEVK	8 2 0 0 0	(N(N(H(H(H(H)))(H(H(H(H)))))))	sp|P0C0L4|CO4A_HUMAN/sp|P0C0L5|CO4B_HUMAN	226/226
SVQEIQATFFYFTPJKTEDTIFLR	7 6 4 0 3	(N(N(H(H(N(H(A)))(N(F)(H(A))))(H(N(F)(H(A)))(N(F)(H(A)))))))	sp|P02763|A1AG1_HUMAN/sp|P19652|A1AG2_HUMAN	72/72
LDGSJK	5 4 2 0 0	(N(N(H(H(N(H(A))))(H(N(H(A)))))))	sp|Q96IV0|NGLY1_HUMAN	117
GFLALYQTVAVJYSQPISEASR	5 4 2 0 0	(N(N(H(H(N(H(A))))(H(N(H(A)))))))	sp|Q9NZP8|C1RL_HUMAN	166
FJLTETSEAEIHQSFQHLLR	6 5 3 0 0	(N(N(H(H(N(H(A))))(H(N(H(A)))(N(H(A)))))))	sp|P01011|AACT_HUMAN	106
QJQCFYJSSYLNVQR	7 6 3 0 1	(N(N(H(H(N(H)(F))(N(H(A))))(H(N(H(A)))(N(H(A)))))))	sp|P19652|A1AG2_HUMAN	88
YTGJASALFILPDQDK	5 4 2 0 0	(N(N(H(H(N(H(A))))(H(N(H(A)))))))	sp|P01011|AACT_HUMAN	271
VLJFTTK	5 4 1 0 0	(N(N(H(H(N(H)))(H(N(H(A)))))))	sp|P13671|CO6_HUMAN	324
IIVPLNNREJISDPTSPLR	5 4 2 0 1	(N(F)(N(H(H(N(H(A))))(H(N(H(A)))))))	sp|P01591|IGJ_HUMAN	71
AFITJFSMIIDGMTYPGIIK	5 4 1 0 0	(N(N(H(H(N(H)))(H(N(H(A)))))))	sp|Q14624|ITIH4_HUMAN	81
LAGKPTHVJVSVVMAEVDGTCY	5 5 2 0 1	(N(F)(N(H(H(N(H(A))))(H(N)(N(H(A)))))))	sp|P01876|IGHA1_HUMAN	340
KVCQDCPLLAPLJDTR	6 5 3 0 1	(N(N(H(H(N(F)(H(A))))(H(N(H(A)))(N(H(A)))))))	sp|P02765|FETUA_HUMAN	156
GCVLLSYLJETVTVSASLESVR	5 4 1 0 2	(N(F)(N(H(H(N(H(A))))(H(N(H(F)))))))	sp|P01023|A2MG_HUMAN	55
STGKPTLYJVSLVMSDTAGTCY	9 2 0 0 0	(N(N(H(H(H))(H(H(H(H(H(H)))))))))	sp|P0DOX6|IGM_HUMAN/sp|P01871|IGHM_HUMAN	563/440
AGLQAFFQVQECJK	5 4 2 0 0	(N(N(H(H(N(H(A))))(H(N(H(A)))))))	sp|P00450|CERU_HUMAN	358
STGKPTLYJVSLVMSDTAGTCY	7 2 0 0 0	(N(N(H(H)(H(H(H(H(H))))))))	sp|P0DOX6|IGM_HUMAN/sp|P01871|IGHM_HUMAN	563/440
MVSHHJLTTGATLINEQWLLTTAK	6 5 2 0 1	(N(N(H(H(N(H)(F)))(H(N(H(A)))(N(H(A)))))))	sp|P00739|HPTR_HUMAN/sp|P00738|HPT_HUMAN	126/184
QMAQJNSR	5 4 1 0 2	(N(N(H(H(N(H)(F)))(H(N(F)(H(A)))))))	sp|Q86YD3|TMM25_HUMAN	324
FJLTETSEAEIHQSFQHLLR	7 6 3 0 2	(N(N(H(H(N(H)(F))(N(H(A))))(H(N(H(A)))(N(F)(H(A)))))))	sp|P01011|AACT_HUMAN	106
AFKHSSTLTTHKRJHTGEK	5 4 2 0 0	(N(N(H(H(N(H(A))))(H(N(H(A)))))))	sp|Q68DY1|ZN626_HUMAN	250
LHHKRLAKECMLQEEJK	4 4 1 0 0	(N(N(H(H(N))(H(N(H(A)))))))	sp|Q8NA61|SPERT_HUMAN	172
QVLFLDTVYGJCSTHFTVK	9 2 0 0 0	(N(N(H(H(H(H)))(H(H)(H(H)(H))))))	sp|P04114|APOB_HUMAN	185
PJHTIYINNLNEKIK	5 4 1 0 2	(N(N(H(H(N(H)(F)))(H(N(F)(H(A)))))))	sp|P09012|SNRPA_HUMAN	9
DFVJASSKYEITTIHNLFR	5 4 2 0 0	(N(N(H(H(N(H(A))))(H(N(H(A)))))))	sp|P05546|HEP2_HUMAN	188
EGDHEFLEVPEAQEDVEATFPVHQPGJYSCSYR	6 5 3 0 1	(N(N(H(H(N(F)(H(A))))(H(N(H(A)))(N(H(A)))))))	sp|P04217|A1BG_HUMAN	179
VDKDLQSLEDILHQVEJK	5 4 2 0 1	(N(F)(N(H(H(N(H(A))))(H(N(H(A)))))))	sp|P02679|FIBG_HUMAN	78
EJISDPTSPLR	5 4 2 0 1	(N(F)(N(H(H(N(H(A))))(H(N(H(A)))))))	sp|P01591|IGJ_HUMAN	71
EJISDPTSPLR	5 5 1 0 0	(N(N(H(N)(H(N(H)))(H(N(H(A)))))))	sp|P01591|IGJ_HUMAN	71
SLGNVJFTVSAEALESQELCGTEVPSVPEHGRK	5 3 0 0 0	(N(N(H(H(H))(H(N(H))))))	sp|P01023|A2MG_HUMAN	869
JISDGFDGIPDNVDAALALPAHSYSGR	6 5 2 0 1	(N(N(H(H(N(H)(F)))(H(N(H(A)))(N(H(A)))))))	sp|P04004|VTNC_HUMAN	242
VYKPSAGJNSLYR	5 4 2 0 0	(N(N(H(H(N(H(A))))(H(N(H(A)))))))	sp|P02749|APOH_HUMAN	162
YTGJASALFILPDQDKMEEVEAMLLPETLKR	6 5 3 0 0	(N(N(H(N(H(A)))(H(N(H(A))))(H(N(H(A)))))))	sp|P01011|AACT_HUMAN	271
VVGVPYQGJATALFILPSEGK	5 4 2 0 0	(N(N(H(H(N(H(A))))(H(N(H(A)))))))	sp|P05154|IPSP_HUMAN	262
QLVEIEKVVLHPJYSQVDIGLIK	6 4 2 0 0	(N(N(H(H(H))(H(N(H(A)))(N(H(A)))))))	sp|P00738|HPT_HUMAN	241
QSVPAHFVALJGSK	6 2 0 0 0	(N(N(H(H(H))(H(H(H))))))	sp|P06681|CO2_HUMAN	621
GLKFJLTETSEAEIHQSFQHLLR	6 5 3 0 0	(N(N(H(H(N(H(A))))(H(N(H(A)))(N(H(A)))))))	sp|P01011|AACT_HUMAN	106
ADGTVNQIEGEATPVJLTEPAK	5 4 1 0 0	(N(N(H(H(N(H)))(H(N(H(A)))))))	sp|P05090|APOD_HUMAN	98
NPPMGGNVVIFDTVITNQEEPYQJHSGR	5 4 2 0 0	(N(N(H(H(N(H(A))))(H(N(H(A)))))))	sp|P02745|C1QA_HUMAN	146
GLKFJLTETSEAEIHQSFQHLLR	7 6 4 0 2	(N(N(H(H(N(H(A)))(N(F)(H(A))))(H(N(H(A)))(N(F)(H(A)))))))	sp|P01011|AACT_HUMAN	106
AGLQAFFQVQECJK	5 4 1 0 0	(N(N(H(H(N(H)))(H(N(H(A)))))))	sp|P00450|CERU_HUMAN	358
LAJLTQGEDQYYLR	5 4 2 0 1	(N(F)(N(H(H(N(H(A))))(H(N(H(A)))))))	sp|P10909|CLUS_HUMAN	374
LKELPGVCJETMMALWEECKPCLK	6 5 3 0 0	(N(N(H(H(N(H(A))))(H(N(H(A)))(N(H(A)))))))	sp|P10909|CLUS_HUMAN	103
YTGJASALFILPDQDKMEEVEAMLLPETLKR	7 6 4 0 0	(N(N(H(H(N(H(A)))(N(H(A))))(H(N(H(A)))(N(H(A)))))))	sp|P01011|AACT_HUMAN	271
LISJCSK	5 4 2 0 0	(N(N(H(H(N(H(A))))(H(N(H(A)))))))	sp|P05156|CFAI_HUMAN	494
VDKDLQSLEDILHQVEJK	6 4 1 0 0	(N(N(H(H(H))(H(N(H))(N(H(A)))))))	sp|P02679|FIBG_HUMAN	78
CGLVPVLAENYJK	5 4 1 0 0	(N(N(H(H(N(H)))(H(N(H(A)))))))	sp|P02787|TRFE_HUMAN	432
PALEDLLLGSEAJLTCTLTGLR	5 3 1 0 0	(N(N(H(H(H))(H(N(H(A)))))))	sp|P01876|IGHA1_HUMAN/sp|P0DOX2|IGA2_HUMAN/sp|P01877|IGHA2_HUMAN	144/246/131
ADGTVNQIEGEATPVJLTEPAKLEVK	5 4 2 0 0	(N(N(H(H(N(H(A))))(H(N(H(A)))))))	sp|P05090|APOD_HUMAN	98
EJLTAPGSDSAVFFEQGTTR	6 5 3 0 1	(N(F)(N(H(H(N(H(A))))(H(N(H(A)))(N(H(A)))))))	sp|P00450|CERU_HUMAN	397
JLSMPLLPADFHK	5 4 2 0 0	(N(N(H(H(N(H(A))))(H(N(H(A)))))))	sp|P05546|HEP2_HUMAN	49
JYTLTGR	5 4 1 0 1	(N(F)(N(H(H(N(H)))(H(N(H(A)))))))	sp|P10643|CO7_HUMAN	754
SLGNVJFTVSAEALESQELCGTEVPSVPEHGR	4 4 1 0 0	(N(N(H(H(N))(H(N(H(A)))))))	sp|P01023|A2MG_HUMAN	869
LSLHRPALEDLLLGSEAJLTCTLTGLR	5 5 0 0 0	(N(N(H(H(N(H)))(H(N)(N(H))))))	sp|P01876|IGHA1_HUMAN/sp|P0DOX2|IGA2_HUMAN/sp|P01877|IGHA2_HUMAN	144/246/131
FSYSKJETYQLFLSYSSK	5 4 2 0 0	(N(N(H(H(N(H(A))))(H(N(H(A)))))))	sp|P02748|CO9_HUMAN	277
EJISDPTSPLR	5 4 2 0 0	(N(N(H(H(N(H(A))))(H(N(H(A)))))))	sp|P01591|IGJ_HUMAN	71
FSDGLESJSSTQFEVK	9 2 0 0 0	(N(N(H(H)(H(H(H(H)))(H(H(H)))))))	sp|P0C0L4|CO4A_HUMAN/sp|P0C0L5|CO4B_HUMAN	226/226
DIMESSPGSSPPJLTPKPLR	5 4 0 0 0	(N(N(H(H(N(H)))(H(N(H))))))	sp|P00519|ABL1_HUMAN	812
DSVSVVLGQHFFJR	5 4 2 0 0	(N(N(H(H(N(H(A))))(H(N(H(A)))))))	sp|Q04756|HGFA_HUMAN	468
ADTHDEILEGLNFJLTEIPEAQIHEGFQELLR	5 4 1 0 1	(N(N(H(H(N(H)(F)))(H(N(H(A)))))))	sp|P01009|A1AT_HUMAN	107
SVQEIQATFFYFTPJKTEDTIFLR	7 6 2 0 3	(N(N(H(H(N(H)(F))(N(H(A))))(H(N(H)(F))(N(F)(H(A)))))))	sp|P02763|A1AG1_HUMAN/sp|P19652|A1AG2_HUMAN	72/72
IITILEEEMJVSVCGLYTYGKPVPGHVTVSICR	5 4 2 0 0	(N(N(H(H(N(H(A))))(H(N(H(A)))))))	sp|P01023|A2MG_HUMAN	247
YLGJATAIFFLPDEGK	6 5 2 0 0	(N(N(H(H(N(H(A))))(H(N(H))(N(H(A)))))))	sp|P01009|A1AT_HUMAN	271
SLGNVJFTVSAEALESQELCGTEVPSVPEHGR	5 4 2 0 0	(N(N(H(H(N(H(A))))(H(N(H(A)))))))	sp|P01023|A2MG_HUMAN	869
JVSVEALASALQLLAR	5 4 2 0 1	(N(F)(N(H(H)(H(N(H(A)))(N(H(A)))))))	sp|Q13790|APOF_HUMAN	139
MVSHHJLTTGATLINEQWLLTTAK	6 5 2 0 3	(N(N(H(H(N(F)(H(A))))(H(N(H)(F))(N(F)(H(A)))))))	sp|P00739|HPTR_HUMAN/sp|P00738|HPT_HUMAN	126/184
GCVLLSYLJETVTVSASLESVR	6 5 2 0 1	(N(F)(N(H(H(N(H(A))))(H(N(H(N(H(A)))))))))	sp|P01023|A2MG_HUMAN	55
CSDGWSFDATTLDDJGTMLFFK	6 5 3 0 0	(N(N(H(H(N(H(A))))(H(N(H(A)))(N(H(A)))))))	sp|P02790|HEMO_HUMAN	64
NVIFSPLSISTALAFLSLGAHJTTLTEILK	6 5 3 0 1	(N(F)(N(H(H(N(H(A))))(H(N(H(A)))(N(H(A)))))))	sp|P01011|AACT_HUMAN	93
TELFSSSCPGGIMLJETGQGYQR	5 4 1 0 0	(N(N(H(H(N(H)))(H(N(H(A)))))))	sp|O95445|APOM_HUMAN	135
JHSCSEGQISIFR	5 4 2 0 0	(N(N(H(H(N(H(A))))(H(N(H(A)))))))	sp|O75882|ATRN_HUMAN	731
RNPPMGGNVVIFDTVITNQEEPYQJHSGR	5 4 1 0 0	(N(N(H(H(N(H)))(H(N(H(A)))))))	sp|P02745|C1QA_HUMAN	146
SVQEIQATFFYFTPJKTEDTIFLR	8 7 4 0 0	(N(N(H(H(N(H(A)))(N(H(A))))(H(N(H(A)))(N(H(N(H(A)))))))))	sp|P02763|A1AG1_HUMAN/sp|P19652|A1AG2_HUMAN	72/72
VYKPSAGJNSLYR	6 5 3 0 1	(N(F)(N(H(H(N(H(A))))(H(N(H(A)))(N(H(A)))))))	sp|P02749|APOH_HUMAN	162
EDALJETR	5 4 2 0 0	(N(N(H(H(N(H(A))))(H(N(H(A)))))))	sp|P10909|CLUS_HUMAN	86
HYTJSSQDVTVPCR	5 4 1 0 1	(N(F)(N(H(H(N(H)))(H(N(H(A)))))))	sp|P0DOX2|IGA2_HUMAN/sp|P01877|IGHA2_HUMAN	207/92
PALEDLLLGSEAJLTCTLTGLR	4 5 0 0 0	(N(N(H(N)(H(N))(H(N(H))))))	sp|P01876|IGHA1_HUMAN/sp|P0DOX2|IGA2_HUMAN/sp|P01877|IGHA2_HUMAN	144/246/131
PALEDLLLGSEAJLTCTLTGLR	4 6 1 0 0	(N(N(H(N)(H(N)(N))(H(N(H(A)))))))	sp|P01876|IGHA1_HUMAN/sp|P0DOX2|IGA2_HUMAN/sp|P01877|IGHA2_HUMAN	144/246/131
DIVEYYJDSJGSHVLQGR	6 5 3 0 0	(N(N(H(H(N(H(A))))(H(N(H(A)))(N(H(A)))))))	sp|P25311|ZA2G_HUMAN	109
IJSSAIKLQLTAQSQVQMK	5 4 2 0 0	(N(N(H(H(N(H(A))))(H(N(H(A)))))))	sp|O00255|MEN1_HUMAN	576
KYNSQJQSNNQFVLYR	6 5 3 0 1	(N(N(H(H(N(F)(H(A))))(H(N(H(A)))(N(H(A)))))))	sp|P01042|KNG1_HUMAN	48
SPYYJVSDEISFHCYDGYTLR	5 4 1 0 2	(N(N(H(H(N(H)(F)))(H(N(F)(H(A)))))))	sp|P00751|CFAB_HUMAN	122
QDQCIYJTTYLNVQR	7 4 3 0 2	(N(F)(N(H(H(H)(H))(H(N(H(A(A))))(N(F)(H(A)))))))	sp|P02763|A1AG1_HUMAN	93
AALAAFNAQNJGSNFQLEEISR	6 5 3 0 2	(N(N(H(H(N(F)(H(A))))(H(N(H(A)))(N(F)(H(A)))))))	sp|P02765|FETUA_HUMAN	176
FEVDSPVYJATWSASLK	6 5 3 0 0	(N(N(H(H(N(H(A))))(H(N(H(A)))(N(H(A)))))))	sp|P04114|APOB_HUMAN	3895
VDKDLQSLEDILHQVEJK	6 5 2 0 0	(N(N(H(H(N(H(A))))(H(N(H))(N(H(A)))))))	sp|P02679|FIBG_HUMAN	78
STGKPTLYJVSLVMSDTAGTCY	8 2 0 0 0	(N(N(H(H(H))(H(H)(H(H(H)))))))	sp|P0DOX6|IGM_HUMAN/sp|P01871|IGHM_HUMAN	563/440
GLKFJLTETSEAEIHQSFQHLLR	7 6 3 0 0	(N(N(H(H(N(H))(N(H(A))))(H(N(H(A)))(N(H(A)))))))	sp|P01011|AACT_HUMAN	106
GHVJITR	5 4 2 0 0	(N(N(H(H(N(H(A))))(H(N(H(A)))))))	sp|P00734|THRB_HUMAN	121
SLGNVJFTVSAEALESQELCGTEVPSVPEHGRK	4 4 1 0 0	(N(N(H(H(N(H))(N(H(A)))))))	sp|P01023|A2MG_HUMAN	869
LSLHRPALEDLLLGSEAJLTCTLTGLR	5 5 2 0 0	(N(N(H(H(N(H(A))))(H(N)(N(H(A)))))))	sp|P01876|IGHA1_HUMAN/sp|P0DOX2|IGA2_HUMAN/sp|P01877|IGHA2_HUMAN	144/246/131
ALPQPQJVTSLLGCTH	6 5 3 0 1	(N(N(H(H(N(F)(H(A))))(H(N(H(A)))(N(H(A)))))))	sp|P02790|HEMO_HUMAN	453
ELHHLQEQJVSNAFLDKGEFYIGSK	6 5 3 0 1	(N(F)(N(H(H(N(H(A))))(H(N(H(A)))(N(H(A)))))))	sp|P00450|CERU_HUMAN	762
GLKFJLTETSEAEIHQSFQHLLR	7 6 3 0 2	(N(N(H(H(N(H)(F))(N(H(A))))(H(N(H(A)))(N(F)(H(A)))))))	sp|P01011|AACT_HUMAN	106
JNSDISSTR	5 5 1 0 0	(N(N(H(N)(H(N(H)))(H(N(H(A)))))))	sp|P01871|IGHM_HUMAN	46
SVTLQIYJHSLTLSAR	6 5 1 0 1	(N(F)(N(H(H(N(H(A))))(H(N(H))(N(H))))))	sp|Q9Y6R7|FCGBP_HUMAN/sp|Q9Y6R7|FCGBP_HUMAN/sp|Q9Y6R7|FCGBP_HUMAN	2138/3339/4540
FSDGLESJSSTQFEVK	9 2 0 0 0	(N(N(H(H(H)(H(H)))(H(H)(H(H))))))	sp|P0C0L4|CO4A_HUMAN/sp|P0C0L5|CO4B_HUMAN	226/226
AGAFLGLTNVAVMJLSGNCLR	9 2 0 0 0	(N(N(H(H)(H(H)(H(H(H(H(H)))))))))	sp|P35858|ALS_HUMAN	368
LDAPTNLQFVJETDSTVLVR	5 4 1 0 1	(N(F)(N(H(H(N(H)))(H(N(H(A)))))))	sp|P02751|FINC_HUMAN	1007
SVQEIQATFFYFTPJKTEDTIFLR	8 7 3 0 2	(N(N(H(N)(H(N(H(A)))(N(F)(H(H))))(H(N(H(A)))(N(F)(H(A)))))))	sp|P02763|A1AG1_HUMAN/sp|P19652|A1AG2_HUMAN	72/72
YTGJASALFILPDQDK	7 6 4 0 0	(N(N(H(H(N(H(A)))(N(H(A))))(H(N(H(A)))(N(H(A)))))))	sp|P01011|AACT_HUMAN	271
ALPQPQJVTSLLGCTH	6 5 1 0 0	(N(N(H(H(N(H(A))))(H(N(H))(N(H))))))	sp|P02790|HEMO_HUMAN	453
IYSGILJLSDITK	5 4 2 0 0	(N(N(H(H(N(H(A))))(H(N(H(A)))))))	sp|P03952|KLKB1_HUMAN	453
QJQCFYJSSYLNVQR	7 6 2 0 1	(N(N(H(H(N(H))(N(H)(F)))(H(N(H(A)))(N(H(A)))))))	sp|P19652|A1AG2_HUMAN	88
AALAAFNAQNJGSNFQLEEISR	5 4 2 0 1	(N(F)(N(H(H(N(H(A))))(H(N(H(A)))))))	sp|P02765|FETUA_HUMAN	176
SLGNVJFTVSAEALESQELCGTEVPSVPEHGR	6 2 0 0 0	(N(N(H(H(H(H(H(H))))))))	sp|P01023|A2MG_HUMAN	869
LSLHRPALEDLLLGSEAJLTCTLTGLR	5 4 0 0 0	(N(N(H(H(N(H)))(H(N(H))))))	sp|P01876|IGHA1_HUMAN/sp|P0DOX2|IGA2_HUMAN/sp|P01877|IGHA2_HUMAN	144/246/131
CGLVPVLAENYJK	5 4 2 0 1	(N(N(H(H(N(H(A))))(H(N(F)(H(A)))))))	sp|P02787|TRFE_HUMAN	432
YKJNSDISSTR	4 4 1 0 1	(N(F)(N(H(H(N))(H(N(H(A)))))))	sp|P01871|IGHM_HUMAN	46
VNQNLVYESGSLJFSK	5 4 2 0 0	(N(N(H(H(N(H(A))))(H(N(H(A)))))))	sp|P04114|APOB_HUMAN	2982
SLTFJETYQDISELVYGAK	5 4 2 0 1	(N(N(H(H(N(H(A))))(H(N(F)(H(A)))))))	sp|P01008|ANT3_HUMAN	187
VSJQTLSLFFTVLQDVPVR	5 5 2 0 1	(N(F)(N(H(H(N(H(A))))(H(N)(N(H(A)))))))	sp|P01023|A2MG_HUMAN	1424
NVIFSPLSISTALAFLSLGAHJTTLTEILK	6 5 2 0 0	(N(N(H(H(N(H(A))))(H(N(H))(N(H(A)))))))	sp|P01011|AACT_HUMAN	93
LSLHRPALEDLLLGSEAJLTCTLTGLR	5 3 1 0 1	(N(N(H(H(H))(H(N(F)(H(A)))))))	sp|P01876|IGHA1_HUMAN/sp|P0DOX2|IGA2_HUMAN/sp|P01877|IGHA2_HUMAN	144/246/131
ADTHDEILEGLNFJLTEIPEAQIHEGFQELLR	5 4 1 0 0	(N(N(H(H(N(H)))(H(N(H(A)))))))	sp|P01009|A1AT_HUMAN	107
VGQLQLSHJLSLVILVPQNLK	6 5 2 0 1	(N(F)(N(H(H(N(H(A))))(H(N(H(N(H(A)))))))))	sp|P05155|IC1_HUMAN	352
TPLTAJITK	5 5 1 0 1	(N(F)(N(H(N)(H(N(H)))(H(N(H(A)))))))	sp|P0DOX2|IGA2_HUMAN/sp|P01877|IGHA2_HUMAN	320/205
ICDLLVANNHFAHFFAPQJLTNMNK	5 4 2 0 0	(N(N(H(H(N(H(A))))(H(N(H(A)))))))	sp|P19827|ITIH1_HUMAN	285
QQQHLFGSJVTDCSGJFCLFR	6 4 1 0 1	(N(N(H(H(N(H(H))))(H(N(F)(H(A)))))))	sp|P02787|TRFE_HUMAN	630
SVQEIQATFFYFTPJKTEDTIFLR	6 5 1 0 0	(N(N(H(H(N(H(A))))(H(N(H))(N(H))))))	sp|P02763|A1AG1_HUMAN/sp|P19652|A1AG2_HUMAN	72/72
KKEDALJETR	6 5 3 0 1	(N(N(H(H(N(F)(H(A))))(H(N(H(A)))(N(H(A)))))))	sp|P10909|CLUS_HUMAN	86
DLQSLEDILHQVEJK	5 4 1 0 0	(N(N(H(H(N(H)))(H(N(H(A)))))))	sp|P02679|FIBG_HUMAN	78
LPTQJITFQTESSVAEQEAEFQSPK	6 5 1 0 0	(N(N(H(H(N(H(A))))(H(N(H))(N(H))))))	sp|Q14624|ITIH4_HUMAN	517
NLFLJHSEJATAK	5 4 2 0 0	(N(N(H(H(N(H(A))))(H(N(H(A)))))))	sp|P00739|HPTR_HUMAN/sp|P00738|HPT_HUMAN	149/207
GVNFJVSK	5 4 2 0 0	(N(N(H(H(N(H(A))))(H(N(H(A)))))))	sp|P03952|KLKB1_HUMAN	127
GTAGNALMDGASQLMGEJR	5 4 1 0 1	(N(N(H(H(N(H)(F)))(H(N(H(A)))))))	sp|P02675|FIBB_HUMAN	394
ITYSIVQTJCSK	5 4 2 0 0	(N(N(H(H(N(H(A))))(H(N(H(A)))))))	sp|P01042|KNG1_HUMAN	205
GHVJITR	5 4 2 0 1	(N(N(H(H(N(H(A))))(H(N(F)(H(A)))))))	sp|P00734|THRB_HUMAN	121
KVCQDCPLLAPLJDTR	6 5 3 0 0	(N(N(H(H(N(H(A))))(H(N(H(A)))(N(H(A)))))))	sp|P02765|FETUA_HUMAN	156
FSDGLESJSSTQFEVK	9 2 0 0 0	(N(N(H(H(H))(H(H(H(H(H(H)))))))))	sp|P0C0L4|CO4A_HUMAN/sp|P0C0L5|CO4B_HUMAN	226/226
KLPPGLLAJFTLLR	5 4 2 0 0	(N(N(H(H(N(H(A))))(H(N(H(A)))))))	sp|P02750|A2GL_HUMAN	186
EJGTVSR	7 6 4 0 2	(N(N(H(H(N(H(A)))(N(F)(H(A))))(H(N(H(A)))(N(F)(H(A)))))))	sp|P19652|A1AG2_HUMAN	103
LDSJLTR	5 4 2 0 0	(N(N(H(H(N(H(A))))(H(N(H(A)))))))	sp|Q8N3K9|CMYA5_HUMAN	1364
TLLJASR	4 5 1 0 1	(N(F)(N(H(N)(H(N))(H(N(H(A)))))))	sp|P01880|IGHD_HUMAN/sp|P0DOX3|IGD_HUMAN	367/496
MDGASJVTCINSR	5 4 1 0 1	(N(F)(N(H(H(N(H)))(H(N(H(A)))))))	sp|P08603|CFAH_HUMAN	1029
IPCSQPPQIEHGTIJSSR	5 4 2 0 0	(N(N(H(H(N(H(A))))(H(N(H(A)))))))	sp|P08603|CFAH_HUMAN	882
AFKHSSTLTTHKRJHTGEK	5 4 1 0 0	(N(N(H(H(N(H)))(H(N(H(A)))))))	sp|Q68DY1|ZN626_HUMAN	250
GINYJSSVAK	5 4 2 0 0	(N(N(H(H(N(H(A))))(H(N(H(A)))))))	sp|P03951|FA11_HUMAN	126
EJGTVSR	6 5 3 0 1	(N(N(H(H(N(F)(H(A))))(H(N(H(A)))(N(H(A)))))))	sp|P19652|A1AG2_HUMAN	103
LSDLSIJSTECLHVHCR	5 4 2 0 1	(N(F)(N(H(H(N(H(A))))(H(N(H(A)))))))	sp|P05156|CFAI_HUMAN	177
PNLKVHIJTTSDSILLK	5 4 2 0 0	(N(N(H(H(N(H(A))))(H(N(H(A)))))))	sp|Q7Z7G0|TARSH_HUMAN	44
EJGTVSR	6 5 3 0 0	(N(N(H(H(N(H(A))))(H(N(H(A)))(N(H(A)))))))	sp|P19652|A1AG2_HUMAN	103
TVLTPATNHMGJVTFTIPANR	5 3 1 0 0	(N(N(H(H(H))(H(N(H(A)))))))	sp|P01024|CO3_HUMAN	85
SLGNVJFTVSAEALESQELCGTEVPSVPEHGR	6 3 0 0 0	(N(N(H(H(H)(H))(H(N(H))))))	sp|P01023|A2MG_HUMAN	869
LAJLTQGEDQYYLR	6 5 3 0 1	(N(N(H(H(N(F)(H(A))))(H(N(H(A)))(N(H(A)))))))	sp|P10909|CLUS_HUMAN	374
YLGJATAIFFLPDEGK	6 4 2 0 0	(N(N(H(H(N(H(A))))(H(N(H(H)(A)))))))	sp|P01009|A1AT_HUMAN	271
MLJTSSLLEQLNEQFNWVSR	5 4 2 0 0	(N(N(H(H(N(H(A))))(H(N(H(A)))))))	sp|P10909|CLUS_HUMAN	354
VSJQTLSLFFTVLQDVPVR	5 4 1 0 1	(N(F)(N(H(H(N(H)))(H(N(H(A)))))))	sp|P01023|A2MG_HUMAN	1424
NVIFSPLSISTALAFLSLGAHJTTLTEILK	5 4 2 0 0	(N(N(H(H(N(H(A))))(H(N(H(A)))))))	sp|P01011|AACT_HUMAN	93
HGIQYFNJNTQHSSLFMLNEVK	5 4 2 0 0	(N(N(H(H(N(H(A))))(H(N(H(A)))))))	sp|P01042|KNG1_HUMAN	169
QLEEFLJQSSPFYFWMNGDRIDSLLENDR	5 4 2 0 0	(N(N(H(H(N(H(A))))(H(N(H(A)))))))	sp|P10909|CLUS_HUMAN	145
GLTFQQJASSMCVPDQDTAIR	5 4 2 0 0	(N(N(H(H(N(H(A))))(H(N(H(A)))))))	sp|P0DOX6|IGM_HUMAN/sp|P01871|IGHM_HUMAN	332/209
MVSHHJLTTGATLINEQWLLTTAK	5 4 0 0 2	(N(N(H(H(N(H(F))))(H(N(H(F)))))))	sp|P00739|HPTR_HUMAN/sp|P00738|HPT_HUMAN	126/184
EJGTISR	6 5 3 0 1	(N(F)(N(H(H(N(H(A))))(H(N(H(A)))(N(H(A)))))))	sp|P02763|A1AG1_HUMAN	103
LAGKPTHVJVSVVMAEVDGTCY	6 5 2 0 1	(N(F)(N(H(H(N(H(A))))(H(N(H(N(H(A)))))))))	sp|P01876|IGHA1_HUMAN	340
EJGTISR	7 6 4 0 0	(N(N(H(H(N(H(A)))(N(H(A))))(H(N(H(A)))(N(H(A)))))))	sp|P02763|A1AG1_HUMAN	103
EJGTISR	6 5 2 0 0	(N(N(H(H(N(H(A))))(H(N(H))(N(H(A)))))))	sp|P02763|A1AG1_HUMAN	103
VVLHPJYSQVDIGLIK	6 5 4 0 0	(N(N(H(H(N(H(A))))(H(N(H(A)))(N(H(A)(A)))))))	sp|P00738|HPT_HUMAN	241
AJLSSQALQMSLDYGFVTPLTSMSIR	5 4 1 0 0	(N(N(H(H(N(H)))(H(N(H(A)))))))	sp|P19827|ITIH1_HUMAN	588
LGSYPVGGJVSFECEDGFILR	5 4 2 0 0	(N(N(H(H(N(H(A))))(H(N(H(A)))))))	sp|P06681|CO2_HUMAN	112
EHEGAIYPDJTTDFQR	6 5 3 0 0	(N(N(H(H(N(H(A))))(H(N(H(A)))(N(H(A)))))))	sp|P00450|CERU_HUMAN	138
AALAAFNAQNJGSNFQLEEISR	6 5 3 0 1	(N(F)(N(H(H(N(H(A))))(H(N(H(A)))(N(H(A)))))))	sp|P02765|FETUA_HUMAN	176
QLAHQSJSTNIFFSPVSIATAFAMLSLGTK	5 4 1 0 1	(N(F)(N(H(H(N(H)))(H(N(H(A)))))))	sp|P01009|A1AT_HUMAN	70
JNSDISSTR	4 3 1 0 1	(N(F)(N(H(H)(H(N(H(A)))))))	sp|P01871|IGHM_HUMAN	46
FSDGLESJSSTQFEVK	8 2 0 0 0	(N(N(H(H(H(H(H(H(H(H))))))))))	sp|P0C0L4|CO4A_HUMAN/sp|P0C0L5|CO4B_HUMAN	226/226
KTLFCJASK	5 4 1 0 0	(N(N(H(H(N(H)))(H(N(H(A)))))))	sp|P20851|C4BPB_HUMAN	64
EJGTVSR	7 6 4 0 0	(N(N(H(H(N(H(A)))(N(H(A))))(H(N(H(A)))(N(H(A)))))))	sp|P19652|A1AG2_HUMAN	103
JHSCEPCQTLAVR	5 4 2 0 0	(N(N(H(H(N(H(A))))(H(N(H(A)))))))	sp|P00748|FA12_HUMAN	433
EJGTISR	7 6 4 0 3	(N(N(H(H(N(H(A)))(N(F)(H(A))))(H(N(F)(H(A)))(N(F)(H(A)))))))	sp|P02763|A1AG1_HUMAN	103
EJGTISR	7 6 4 0 1	(N(F)(N(H(H(N(H(A(N(H(A)))))))(H(N(H(A(N(H(A))))))))))	sp|P02763|A1AG1_HUMAN	103
VIPDDJQTDSGMVLASEELK	5 4 1 0 0	(N(N(H(H(N(H)))(H(N(H(A)))))))	sp|P35968|VGFR2_HUMAN	1256
EJGTISR	6 5 3 0 1	(N(N(H(H(N(F)(H(A))))(H(N(H(A)))(N(H(A)))))))	sp|P02763|A1AG1_HUMAN	103
GLTFQQJASSMCVPDQDTAIR	5 5 1 0 1	(N(N(H(N)(H(N(H)(F)))(H(N(H(A)))))))	sp|P0DOX6|IGM_HUMAN/sp|P01871|IGHM_HUMAN	332/209
QQQHLFGSJVTDCSGJFCLFR	5 4 2 0 1	(N(F)(N(H(H)(H(N(H(A)))(N(H(A)))))))	sp|P02787|TRFE_HUMAN	630
TELFSSSCPGGIMLJETGQGYQR	5 4 1 0 2	(N(F)(N(H(H(N(H(A))))(H(N(H(F)))))))	sp|O95445|APOM_HUMAN	135
GLCVJASAVSR	5 4 2 0 1	(N(F)(N(H(H(N(H(A))))(H(N(H(A)))))))	sp|P17936|IBP3_HUMAN	116
YNSQJQSNNQFVLYR	5 4 2 0 0	(N(N(H(H(N(H(A))))(H(N(H(A)))))))	sp|P01042|KNG1_HUMAN	48
VTQJLTLIEESLTSEFIHDIDR	5 4 1 0 1	(N(F)(N(H(H(N(H)))(H(N(H(A)))))))	sp|P36955|PEDF_HUMAN	285
IPCSQPPQIEHGTIJSSR	5 4 1 0 0	(N(N(H(H(N(H)))(H(N(H(A)))))))	sp|P08603|CFAH_HUMAN	882
LSLHRPALEDLLLGSEAJLTCTLTGLR	6 3 1 0 0	(N(N(H(H)(H(H)(H(N(H(A))))))))	sp|P01876|IGHA1_HUMAN/sp|P0DOX2|IGA2_HUMAN/sp|P01877|IGHA2_HUMAN	144/246/131
SVQEIQATFFYFTPJKTEDTIFLR	7 4 3 0 2	(N(F)(N(H(H(H)(H))(H(N(H(A(A))))(N(F)(H(A)))))))	sp|P02763|A1AG1_HUMAN/sp|P19652|A1AG2_HUMAN	72/72
LNAENJATFYFK	6 5 3 0 0	(N(N(H(H(N(H(A))))(H(N(H(A)))(N(H(A)))))))	sp|P01042|KNG1_HUMAN	294
SVQEIQATFFYFTPJKTEDTIFLR	7 6 2 0 1	(N(N(H(H(N(H))(N(H)(F)))(H(N(H(A)))(N(H(A)))))))	sp|P02763|A1AG1_HUMAN/sp|P19652|A1AG2_HUMAN	72/72
GLTFQQJASSMCVPDQDTAIR	5 5 2 0 1	(N(F)(N(H(H(N(H(A))))(H(N)(N(H(A)))))))	sp|P0DOX6|IGM_HUMAN/sp|P01871|IGHM_HUMAN	332/209
VTACHSSQPJATLYK	5 4 2 0 0	(N(N(H(H(N(H(A))))(H(N(H(A)))))))	sp|P05543|THBG_HUMAN	36
VYLQGLIDCYLFGJSSTVLEDSK	5 4 2 0 0	(N(N(H(H(N(H(A))))(H(N(H(A)))))))	sp|P35542|SAA4_HUMAN	94
TFSSMTCASGAJVSEQLSLK	5 4 2 0 0	(N(N(H(H(N(H(A))))(H(N(H(A)))))))	sp|P20742|PZP_HUMAN	932
FITDKHFYFJK	5 4 2 0 0	(N(N(H(H(N(H(A))))(H(N(H(A)))))))	sp|Q9Y278|HS3S2_HUMAN	306
FVEGSHJSTVSLTTK	6 3 1 0 0	(N(N(H(H)(H(H)(H(N(H(A))))))))	sp|P04114|APOB_HUMAN	3411
CGLVPVLAENYJK	6 5 2 0 0	(N(N(H(H(N(H(A))))(H(N(H))(N(H(A)))))))	sp|P02787|TRFE_HUMAN	432
ADGTVNQIEGEATPVJLTEPAKLEVK	5 4 2 0 1	(N(F)(N(H(H(N(H(A))))(H(N(H(A)))))))	sp|P05090|APOD_HUMAN	98
ADGTVNQIEGEATPVJLTEPAKLEVK	4 3 1 0 1	(N(F)(N(H(H)(H(N(H(A)))))))	sp|P05090|APOD_HUMAN	98
FJLTETSEAEIHQSFQHLLR	6 5 2 0 0	(N(N(H(H(N(H(A))))(H(N(H))(N(H(A)))))))	sp|P01011|AACT_HUMAN	106
VLSJNSDANLELINTWVAK	6 5 3 0 1	(N(N(H(H(N(F)(H(A))))(H(N(H(A)))(N(H(A)))))))	sp|P05155|IC1_HUMAN	253
ELHHLQEQJVSNAFLDKGEFYIGSK	6 5 3 0 0	(N(N(H(H(N(H(A))))(H(N(H(A)))(N(H(A)))))))	sp|P00450|CERU_HUMAN	762
VSJQTLSLFFTVLQDVPVR	6 5 2 0 1	(N(N(H(H(N(H)(F)))(H(N(H(A)))(N(H(A)))))))	sp|P01023|A2MG_HUMAN	1424
MVSHHJLTTGATLINEQWLLTTAK	6 5 3 0 1	(N(F)(N(H(H(N(H(A))))(H(N(H(A)))(N(H(A)))))))	sp|P00739|HPTR_HUMAN/sp|P00738|HPT_HUMAN	126/184
GCVLLSYLJETVTVSASLESVR	5 5 1 0 1	(N(F)(N(H(H(N)(N(H)))(H(N(H(A)))))))	sp|P01023|A2MG_HUMAN	55
LSLHRPALEDLLLGSEAJLTCTLTGLR	5 4 1 0 0	(N(N(H(H(H))(H(N)(N(H(A)))))))	sp|P01876|IGHA1_HUMAN/sp|P0DOX2|IGA2_HUMAN/sp|P01877|IGHA2_HUMAN	144/246/131
AVJITSENLIDDVVSLIR	5 4 2 0 1	(N(N(H(H(N(H(A))))(H(N(F)(H(A)))))))	sp|P02748|CO9_HUMAN	415
QDQCIYJTTYLNVQR	6 5 3 0 1	(N(N(H(H(N(F)(H(A))))(H(N(H(A)))(N(H(A)))))))	sp|P02763|A1AG1_HUMAN	93
EDJISAK	7 6 4 0 1	(N(N(H(H(N(H(A)))(N(H(A))))(H(N(H(A)))(N(F)(H(A)))))))	sp|Q8TDR0|MIPT3_HUMAN	360
VIDFJCTTSSVSSALANTK	5 4 1 0 0	(N(N(H(H(N(H)))(H(N(H(A)))))))	sp|P04196|HRG_HUMAN	125
SVQEIQATFFYFTPJKTEDTIFLR	5 4 3 0 3	(N(F)(N(H(H(N(F)(H(A))))(H(N(F)(H(A(A))))))))	sp|P02763|A1AG1_HUMAN/sp|P19652|A1AG2_HUMAN	72/72
NJATVHEQVGGPSLTSDLQAQSK	6 5 3 0 1	(N(N(H(H(N(F)(H(A))))(H(N(H(A)))(N(H(A)))))))	sp|P04004|VTNC_HUMAN	86
MDGASJVTCINSR	5 4 1 0 0	(N(N(H(H(N(H)))(H(N(H(A)))))))	sp|P08603|CFAH_HUMAN	1029
YLGJATAIFFLPDEGK	6 3 1 0 0	(N(N(H(H)(H(H)(H(N(H(A))))))))	sp|P01009|A1AT_HUMAN	271
TPLTAJITK	4 5 0 0 1	(N(F)(N(H(N)(H(N(H))(N(H))))))	sp|P0DOX2|IGA2_HUMAN/sp|P01877|IGHA2_HUMAN	320/205
VYKPSAGJNSLYR	6 5 3 0 0	(N(N(H(H(N(H(A))))(H(N(H(A)))(N(H(A)))))))	sp|P02749|APOH_HUMAN	162
EJGTISR	7 6 4 0 1	(N(N(H(H(N(H(A)))(N(H(A))))(H(N(H(A)))(N(F)(H(A)))))))	sp|P02763|A1AG1_HUMAN	103
SIPACVPWSPYLFQPJDTCIVSGWGR	5 4 1 0 0	(N(N(H(H(N(H)))(H(N(H(A)))))))	sp|P05156|CFAI_HUMAN	464
QLAHQSJSTNIFFSPVSIATAFAMLSLGTK	5 4 1 0 3	(N(F)(N(H(H(N(H)(F)))(H(N(F)(H(A)))))))	sp|P01009|A1AT_HUMAN	70
QLEEFLJQSSPFYFWMNGDR	5 4 2 0 0	(N(N(H(H(N(H(A))))(H(N(H(A)))))))	sp|P10909|CLUS_HUMAN	145
LSLHRPALEDLLLGSEAJLTCTLTGLR	5 4 0 0 0	(N(N(H(H(N))(H(H)(H)(N)))))	sp|P01876|IGHA1_HUMAN/sp|P0DOX2|IGA2_HUMAN/sp|P01877|IGHA2_HUMAN	144/246/131
JISDGFDGIPDNVDAALALPAHSYSGR	8 7 1 0 0	(N(N(H(H(N(H(A))))(H(N(H(N(H(N(H(N(H))))))))))))	sp|P04004|VTNC_HUMAN	242
VVLHPJYSQVDIGLIK	7 6 2 0 1	(N(N(H(H(N(H))(N(H(A))))(H(N(H))(N(F)(H(A)))))))	sp|P00738|HPT_HUMAN	241
VGQLQLSHJLSLVILVPQNLK	5 4 2 0 1	(N(F)(N(H(H(N(H(A))))(H(N(H(A)))))))	sp|P05155|IC1_HUMAN	352
KKEDALJETR	6 5 3 0 0	(N(N(H(H(N(H(A))))(H(N(H(A)))(N(H(A)))))))	sp|P10909|CLUS_HUMAN	86
HJSTGCLR	5 4 1 0 0	(N(N(H(H(N(H)))(H(N(H(A)))))))	sp|P10909|CLUS_HUMAN	291
GLJLTEDTYKPR	6 5 3 0 0	(N(N(H(H(N(H(A))))(H(N(H(A)))(N(H(A)))))))	sp|Q08380|LG3BP_HUMAN	398
AQLLQGLGFJLTER	6 5 2 0 0	(N(N(H(H(N(H)))(H(N(H(A)))(N(H(A)))))))	sp|P08185|CBG_HUMAN	96
GTAGNALMDGASQLMGEJR	3 3 0 0 0	(N(N(H(H(N(H))))))	sp|P02675|FIBB_HUMAN	394
SLTFJETYQDISELVYGAK	5 4 2 0 0	(N(N(H(H)(H(N(H(A)))(N(H(A)))))))	sp|P01008|ANT3_HUMAN	187
AQLLQGLGFJLTER	6 5 3 0 1	(N(N(H(H(N(F)(H(A))))(H(N(H(A)))(N(H(A)))))))	sp|P08185|CBG_HUMAN	96
JLSMPLLPADFHK	6 5 3 0 0	(N(N(H(H(N(H(A))))(H(N(H(A)))(N(H(A)))))))	sp|P05546|HEP2_HUMAN	49
SLGNVJFTVSAEALESQELCGTEVPSVPEHGR	6 2 0 0 0	(N(N(H(H)(H(H)(H(H))))))	sp|P01023|A2MG_HUMAN	869
VSJQTLSLFFTVLQDVPVR	5 4 2 0 0	(N(N(H(H)(H(N(H(A)))(N(H(A)))))))	sp|P01023|A2MG_HUMAN	1424
EJSTVDFSKVDMNFMR	5 4 2 0 0	(N(N(H(H(N(H(A))))(H(N(H(A)))))))	sp|Q9Y6M7|S4A7_HUMAN	406
ADGTVNQIEGEATPVJLTEPAKLEVK	6 5 1 0 1	(N(F)(N(H(H(N(H(A))))(H(N(H))(N(H))))))	sp|P05090|APOD_HUMAN	98
PALEDLLLGSEAJLTCTLTGLR	5 5 0 0 0	(N(N(H(H(N(H)))(H(N)(N(H))))))	sp|P01876|IGHA1_HUMAN/sp|P0DOX2|IGA2_HUMAN/sp|P01877|IGHA2_HUMAN	144/246/131
EGDHEFLEVPEAQEDVEATFPVHQPGJYSCSYR	5 4 1 0 0	(N(N(H(H(N(H)))(H(N(H(A)))))))	sp|P04217|A1BG_HUMAN	179
MLJTSSLLEQLNEQFNWVSR	6 5 3 0 0	(N(N(H(H(N(H(A))))(H(N(H(A)))(N(H(A)))))))	sp|P10909|CLUS_HUMAN	354
IITILEEEMJVSVCGLYTYGK	5 4 2 0 0	(N(N(H(H(N(H(A))))(H(N(H(A)))))))	sp|P01023|A2MG_HUMAN	247
STGKPTLYJVSLVMSDTAGTCY	6 2 0 0 0	(N(N(H(H(H))(H(H(H))))))	sp|P0DOX6|IGM_HUMAN/sp|P01871|IGHM_HUMAN	563/440
YTGJASALFILPDQDK	6 5 3 0 1	(N(N(H(H(N(F)(H(A))))(H(N(H(A)))(N(H(A)))))))	sp|P01011|AACT_HUMAN	271
VDKDLQSLEDILHQVEJK	5 4 1 0 1	(N(F)(N(H(H(N(H)))(H(N(H(A)))))))	sp|P02679|FIBG_HUMAN	78
SLGNVJFTVSAEALESQELCGTEVPSVPEHGR	3 3 0 0 0	(N(N(H(H)(H(N)))))	sp|P01023|A2MG_HUMAN	869
LQNNENJISCVER	5 4 2 0 0	(N(N(H(H(N(H(A))))(H(N(H(A)))))))	sp|Q03591|FHR1_HUMAN/sp|P36980|FHR2_HUMAN	126/126
EJGTVSR	7 6 4 0 3	(N(N(H(H(N(H(A)))(N(F)(H(A))))(H(N(F)(H(A)))(N(F)(H(A)))))))	sp|P19652|A1AG2_HUMAN	103
EJGTISR	8 7 4 0 0	(N(N(H(H(N(H(A)))(N(H(A))))(H(N(H(A)))(N(H(N(H(A)))))))))	sp|P02763|A1AG1_HUMAN	103
KKEDALJETR	5 4 1 0 0	(N(N(H(H(N(H)))(H(N(H(A)))))))	sp|P10909|CLUS_HUMAN	86
MVSHHJLTTGATLINEQWLLTTAK	5 4 1 0 3	(N(N(H(H(N(F)(H(A))))(H(N(F)(H(F)))))))	sp|P00739|HPTR_HUMAN/sp|P00738|HPT_HUMAN	126/184
TPLTAJITK	5 5 1 0 1	(N(F)(N(H(H(N)(N(H)))(H(N(H(A)))))))	sp|P0DOX2|IGA2_HUMAN/sp|P01877|IGHA2_HUMAN	320/205
VCQDCPLLAPLJDTR	5 4 2 0 0	(N(N(H(H(N(H(A))))(H(N(H(A)))))))	sp|P02765|FETUA_HUMAN	156
GCVLLSYLJETVTVSASLESVR	5 4 1 0 1	(N(F)(N(H(H(N(H)))(H(N(H(A)))))))	sp|P01023|A2MG_HUMAN	55
VSJQTLSLFFTVLQDVPVR	6 5 2 0 0	(N(N(H(H(N(H(A))))(H(N(H))(N(H(A)))))))	sp|P01023|A2MG_HUMAN	1424
AALAAFNAQNJGSNFQLEEISR	5 4 2 0 1	(N(N(H(H(N(H(A))))(H(N(F)(H(A)))))))	sp|P02765|FETUA_HUMAN	176
PALEDLLLGSEAJLTCTLTGLR	5 5 1 0 0	(N(N(H(H(N)(N(H)))(H(N(H(A)))))))	sp|P01876|IGHA1_HUMAN/sp|P0DOX2|IGA2_HUMAN/sp|P01877|IGHA2_HUMAN	144/246/131
PALEDLLLGSEAJLTCTLTGLR	4 4 1 0 0	(N(N(H(H(N))(H(N(H(A)))))))	sp|P01876|IGHA1_HUMAN/sp|P0DOX2|IGA2_HUMAN/sp|P01877|IGHA2_HUMAN	144/246/131
QIGLYPVLVIDSSGYVNPJYTGR	5 4 2 0 0	(N(N(H(H(N(H(A))))(H(N(H(A)))))))	sp|P01833|PIGR_HUMAN	186
SVQEIQATFFYFTPJKTEDTIFLR	8 7 1 0 0	(N(N(H(H(N(H(A))))(H(N(H(N(H(N(H(N(H))))))))))))	sp|P02763|A1AG1_HUMAN/sp|P19652|A1AG2_HUMAN	72/72
IYSJHSALESLALIPLQAPLK	5 4 2 0 1	(N(F)(N(H(H(N(H(A))))(H(N(H(A)))))))	sp|P55058|PLTP_HUMAN	398
LAGKPTHVJVSVVMAEVDGTCY	5 5 2 0 0	(N(N(H(N)(H(N(H(A))))(H(N(H(A)))))))	sp|P01876|IGHA1_HUMAN	340
MVSHHJLTTGATLINEQWLLTTAK	5 4 1 0 0	(N(N(H(H(H))(H(N)(N(H(A)))))))	sp|P00739|HPTR_HUMAN/sp|P00738|HPT_HUMAN	126/184
GTAGNALMDGASQLMGEJR	5 4 1 0 1	(N(F)(N(H(H(N(H)))(H(N(H(A)))))))	sp|P02675|FIBB_HUMAN	394
TLYETEVFSTDFSJISAAK	6 5 3 0 0	(N(N(H(N(H(A)))(H(N(H(A))))(H(N(H(A)))))))	sp|P05543|THBG_HUMAN	165
VSJQTLSLFFTVLQDVPVR	6 5 1 0 1	(N(F)(N(H(H(N(H(A))))(H(N(H))(N(H))))))	sp|P01023|A2MG_HUMAN	1424
ELHHLQEQJVSNAFLDKGEFYIGSK	6 5 2 0 1	(N(N(H(H(N(H)(F)))(H(N(H(A)))(N(H(A)))))))	sp|P00450|CERU_HUMAN	762
STGKPTLYJVSLVMSDTAGTCY	7 2 0 0 0	(N(N(H(H(H))(H(H)(H(H))))))	sp|P0DOX6|IGM_HUMAN/sp|P01871|IGHM_HUMAN	563/440
AVLQLNEEGVDTAGSTGVTLJLTSKPIILR	6 5 3 0 0	(N(N(H(H(N(H(A))))(H(N(H(A)))(N(H(A)))))))	sp|P08185|CBG_HUMAN	369
ITYSIVQTJCSK	6 5 3 0 1	(N(N(H(H(N(F)(H(A))))(H(N(H(A)))(N(H(A)))))))	sp|P01042|KNG1_HUMAN	205
FJLTETSEAEIHQSFQHLLR	7 6 3 0 3	(N(N(H(H(N(H)(F))(N(F)(H(A))))(H(N(H(A)))(N(F)(H(A)))))))	sp|P01011|AACT_HUMAN	106
GLTFQQJASSMCVPDQDTAIR	5 5 1 0 1	(N(N(H(H(N(H(A))))(H(N(H))(N(F))))))	sp|P0DOX6|IGM_HUMAN/sp|P01871|IGHM_HUMAN	332/209
STGKPTLYJVSLVMSDTAGTCY	8 2 0 0 0	(N(N(H(H(H))(H(H(H))(H(H))))))	sp|P0DOX6|IGM_HUMAN/sp|P01871|IGHM_HUMAN	563/440
VVLHPJYSQVDIGLIK	4 4 1 0 3	(N(F)(N(H(H(N(F)))(H(N(F)(H(A)))))))	sp|P00738|HPT_HUMAN	241
AFGSNPJLTK	5 4 2 0 0	(N(N(H(H(N(H(A))))(H(N(H(A)))))))	sp|P22792|CPN2_HUMAN	74
ITYSIVQTJCSK	8 7 1 0 0	(N(N(H(H(N(H(A))))(H(N(H(N(H(N(H(N(H))))))))))))	sp|P01042|KNG1_HUMAN	205
GTAGNALMDGASQLMGEJR	5 4 0 0 0	(N(N(H(H(N(H)))(H(N(H))))))	sp|P02675|FIBB_HUMAN	394
EEQYJSTYR	4 5 1 0 1	(N(F)(N(H(N)(H(N(H))(N(H(A)))))))	sp|P0DOX5|IGG1_HUMAN/sp|P01857|IGHG1_HUMAN	299/180
HJFSHCCSK	5 4 1 0 0	(N(N(H(H(N(H)))(H(N(H(A)))))))	sp|P43652|AFAM_HUMAN	109
VDKDLQSLEDILHQVEJK	4 4 1 0 0	(N(N(H(H(N))(H(N(H(A)))))))	sp|P02679|FIBG_HUMAN	78
NPVGLIGAEJATGETDPSHSK	6 5 3 0 1	(N(N(H(H(N(H(A))))(H(N(H(A)))(N(F)(H(A)))))))	sp|P43251|BTD_HUMAN	349
EEQFJSTFR	3 3 0 0 1	(N(F)(N(H(H(N(H))))))	sp|P01859|IGHG2_HUMAN	176
VVLHPJYSQVDIGLIK	6 4 2 0 1	(N(N(H(H(H))(H(N(H(A)))(N(F)(H(A)))))))	sp|P00738|HPT_HUMAN	241
EEQFJSTFR	5 4 0 0 1	(N(F)(N(H(H(N(H)))(H(N(H))))))	sp|P01859|IGHG2_HUMAN	176
LAJLTQGEDQYYLR	6 5 3 0 0	(N(N(H(H(N(H(A))))(H(N(H(A)))(N(H(A)))))))	sp|P10909|CLUS_HUMAN	374
LAGKPTHVJVSVVMAEVDGTCY	5 4 1 0 1	(N(F)(N(H(H(N(H)))(H(N(H(A)))))))	sp|P01876|IGHA1_HUMAN	340
LPTQJITFQTESSVAEQEAEFQSPK	5 4 2 0 1	(N(N(H(H(N(H(A))))(H(N(F)(H(A)))))))	sp|Q14624|ITIH4_HUMAN	517
AALAAFNAQNJGSNFQLEEISR	8 7 1 0 0	(N(N(H(H(N(H(A))))(H(N(H(N(H(N(H(N(H))))))))))))	sp|P02765|FETUA_HUMAN	176
SLTFJETYQDISELVYGAK	5 4 1 0 0	(N(N(H(H(N(H)))(H(N(H(A)))))))	sp|P01008|ANT3_HUMAN	187
TPLTAJITK	3 5 0 0 1	(N(F)(N(H(N)(H(N))(H(N)))))	sp|P0DOX2|IGA2_HUMAN/sp|P01877|IGHA2_HUMAN	320/205
PALEDLLLGSEAJLTCTLTGLR	5 5 2 0 1	(N(F)(N(H(N)(H(N(H(A))))(H(N(H(A)))))))	sp|P01876|IGHA1_HUMAN/sp|P0DOX2|IGA2_HUMAN/sp|P01877|IGHA2_HUMAN	144/246/131
YLGJATAIFFLPDEGKLQHLENELTHDIITK	5 4 1 0 0	(N(N(H(H(N(H)))(H(N(H(A)))))))	sp|P01009|A1AT_HUMAN	271
JISDGFDGIPDNVDAALALPAHSYSGR	5 4 2 0 1	(N(F)(N(H(H(N(H(A))))(H(N(H(A)))))))	sp|P04004|VTNC_HUMAN	242
LDAPTNLQFVJETDSTVLVR	5 4 1 0 0	(N(N(H(H(N(H)))(H(N(H(A)))))))	sp|P02751|FINC_HUMAN	1007
YKJNSDISSTR	5 5 1 0 1	(N(F)(N(H(H(N)(N(H)))(H(N(H(A)))))))	sp|P01871|IGHM_HUMAN	46
MLJTSSLLEQLNEQFNWVSR	6 5 1 0 0	(N(N(H(H(N(H(A))))(H(N(H))(N(H))))))	sp|P10909|CLUS_HUMAN	354
QLDMLDLSJNSLASVPEGLWASLGQPNWDMR	5 4 2 0 0	(N(N(H(H(N(H(A))))(H(N(H(A)))))))	sp|P02750|A2GL_HUMAN	269
ELHHLQEQJVSNAFLDK	6 5 3 0 1	(N(F)(N(H(H(N(H(A))))(H(N(H(A)))(N(H(A)))))))	sp|P00450|CERU_HUMAN	762
FJLTETSEAEIHQSFQHLLR	6 5 3 0 1	(N(N(H(H(N(F)(H(A))))(H(N(H(A)))(N(H(A)))))))	sp|P01011|AACT_HUMAN	106
JGSLFAFR	5 4 2 0 0	(N(N(H(H(N(H(A))))(H(N(H(A)))))))	sp|P04004|VTNC_HUMAN	169
TLJQSSDELQLSMGNAMFVK	6 5 3 0 0	(N(N(H(N(H(A)))(H(N(H(A))))(H(N(H(A)))))))	sp|P01011|AACT_HUMAN	127
SLGNVJFTVSAEALESQELCGTEVPSVPEHGR	4 3 1 0 0	(N(N(H(H)(H(N(H(A)))))))	sp|P01023|A2MG_HUMAN	869
NEEYJK	6 4 2 0 0	(N(N(H(H(H))(H(N(H(A)))(N(H(A)))))))	sp|P02763|A1AG1_HUMAN/sp|P19652|A1AG2_HUMAN	56/56
JNSLPR	6 3 2 0 1	(N(N(H(H(H)(H))(H(N(F)(H(A(A))))))))	sp|Q68E01|INT3_HUMAN/sp|P32302|CXCR5_HUMAN	899/196
QLAHQSJSTNIFFSPVSIATAFAMLSLGTK	6 5 2 0 0	(N(N(H(H(N(H(A))))(H(N(H))(N(H(A)))))))	sp|P01009|A1AT_HUMAN	70
JISDGFDGIPDNVDAALALPAHSYSGR	5 4 1 0 0	(N(N(H(H(N(H)))(H(N(H(A)))))))	sp|P04004|VTNC_HUMAN	242
ELPGVCJETMMALWEECKPCLK	6 5 3 0 0	(N(N(H(H(N(H(A))))(H(N(H(A)))(N(H(A)))))))	sp|P10909|CLUS_HUMAN	103
JTTCQDLQIEVTVK	5 4 1 0 0	(N(N(H(H(N(H)))(H(N(H(A)))))))	sp|P0C0L4|CO4A_HUMAN/sp|P0C0L5|CO4B_HUMAN	1391/1391
LSLHRPALEDLLLGSEAJLTCTLTGLR	5 5 2 0 0	(N(N(H(N)(H(N(H(A))))(H(N(H(A)))))))	sp|P01876|IGHA1_HUMAN/sp|P0DOX2|IGA2_HUMAN/sp|P01877|IGHA2_HUMAN	144/246/131
VGQLQLSHJLSLVILVPQNLK	6 4 1 0 1	(N(N(H(H(N(H(H))))(H(N(F)(H(A)))))))	sp|P05155|IC1_HUMAN	352
VVLHPJYSQVDIGLIK	7 6 3 0 1	(N(N(H(H(N(H))(N(F)(H(A))))(H(N(H(A)))(N(H(A)))))))	sp|P00738|HPT_HUMAN	241
VVLHPJYSQVDIGLIK	7 6 2 0 3	(N(N(H(H(N(H)(F))(N(H(A))))(H(N(H)(F))(N(F)(H(A)))))))	sp|P00738|HPT_HUMAN	241
JGTLVAFR	5 3 1 0 0	(N(N(H(H(H))(H(N(H(A)))))))	sp|Q92954|PRG4_HUMAN	1159
FJDTEVLQR	5 4 2 0 0	(N(N(H(H(N(H(A))))(H(N(H(A)))))))	sp|P43251|BTD_HUMAN	150
YKJNSDISSTR	5 5 1 0 1	(N(F)(N(H(N)(H(N(H)))(H(N(H(A)))))))	sp|P01871|IGHM_HUMAN	46
QPIDJVSR	5 4 1 0 2	(N(N(H(H(N(H)(F)))(H(N(F)(H(A)))))))	sp|Q8N201|INT1_HUMAN	345
EEQYJSTYR	5 4 1 0 1	(N(F)(N(H(H(N(H)))(H(N(H(A)))))))	sp|P0DOX5|IGG1_HUMAN/sp|P01857|IGHG1_HUMAN	299/180
EEQFJSTYR	4 5 1 0 1	(N(F)(N(H(N)(H(N))(H(N(H(A)))))))	sp|P01861|IGHG4_HUMAN	177
EEQFJSTFR	5 4 0 0 1	(N(F)(N(H(H(N))(H(N(H(H)))))))	sp|P01859|IGHG2_HUMAN	176
QVLFLDTVYGJCSTHFTVK	5 2 0 0 0	(N(N(H(H(H))(H(H)))))	sp|P04114|APOB_HUMAN	185
NVIFSPLSISTALAFLSLGAHJTTLTEILK	5 4 2 0 0	(N(N(H(H)(H(N(H(A)))(N(H(A)))))))	sp|P01011|AACT_HUMAN	93
ALQAVYSMMSWPDDVPPEGWJR	5 4 2 0 0	(N(N(H(H(N(H(A))))(H(N(H(A)))))))	sp|P00751|CFAB_HUMAN	378
ESVTDHVNLITPLEKPLQJFTLCFR	5 4 1 0 0	(N(N(H(H(N(H)))(H(N(H(A)))))))	sp|P02743|SAMP_HUMAN	51
DFVJASSK	5 4 2 0 0	(N(N(H(H(N(H(A))))(H(N(H(A)))))))	sp|P05546|HEP2_HUMAN	188
GLTFQQJASSMCVPDQDTAIR	4 5 1 0 1	(N(N(H(N)(H(N(F)))(H(N(H(A)))))))	sp|P0DOX6|IGM_HUMAN/sp|P01871|IGHM_HUMAN	332/209
GLTFQQJASSMCVPDQDTAIR	4 5 1 0 1	(N(F)(N(H(N)(H(N))(H(N(H(A)))))))	sp|P0DOX6|IGM_HUMAN/sp|P01871|IGHM_HUMAN	332/209
QVLFLDTVYGJCSTHFTVK	8 2 0 0 0	(N(N(H(H)(H(H(H))(H(H(H)))))))	sp|P04114|APOB_HUMAN	185
AEMLJVSK	5 4 2 0 0	(N(N(H(H(N(H(A))))(H(N(H(A)))))))	sp|B5MCY1|TDR15_HUMAN	1535
ADTHDEILEGLNFJLTEIPEAQIHEGFQELLR	6 4 2 0 0	(N(N(H(H(H))(H(N(H(A)))(N(H(A)))))))	sp|P01009|A1AT_HUMAN	107
VVLHPJYSQVDIGLIK	5 4 3 0 3	(N(F)(N(H(H(N(F)(H(A))))(H(N(F)(H(A(A))))))))	sp|P00738|HPT_HUMAN	241
YLGJATAIFFLPDEGK	6 4 2 0 0	(N(N(H(H(H))(H(N(H(A)))(N(H(A)))))))	sp|P01009|A1AT_HUMAN	271
AGAFLGLTNVAVMJLSGNCLR	9 2 0 0 0	(N(N(H(H)(H(H(H(H)))(H(H(H)))))))	sp|P35858|ALS_HUMAN	368
EJGTISR	8 7 4 0 1	(N(N(H(H(N(H))(N(F)(H(A))))(H(N(H(A)))(N(H(N(H(A(A))))))))))	sp|P02763|A1AG1_HUMAN	103
LNAENJATFYFK	5 4 2 0 1	(N(F)(N(H(H(N(H(A))))(H(N(H(A)))))))	sp|P01042|KNG1_HUMAN	294
SLGNVJFTVSAEALESQELCGTEVPSVPEHGRK	4 4 1 0 0	(N(N(H(H(N))(H(N(H(A)))))))	sp|P01023|A2MG_HUMAN	869
QQQHLFGSJVTDCSGJFCLFR	7 5 2 0 1	(N(N(H(N)(H(H)(H))(H(N(H(A)))(N(F)(H(A)))))))	sp|P02787|TRFE_HUMAN	630
ADGTVNQIEGEATPVJLTEPAK	5 4 1 0 1	(N(F)(N(H(H(N(H)))(H(N(H(A)))))))	sp|P05090|APOD_HUMAN	98
MLJTSSLLEQLNEQFNWVSR	6 5 3 0 1	(N(F)(N(H(H(N(H(A))))(H(N(H(A)))(N(H(A)))))))	sp|P10909|CLUS_HUMAN	354
NVIFSPLSISTALAFLSLGAHJTTLTEILK	6 5 3 0 0	(N(N(H(N(H(A)))(H(N(H(A))))(H(N(H(A)))))))	sp|P01011|AACT_HUMAN	93
VSJQTLSLFFTVLQDVPVR	5 4 1 0 1	(N(N(H(H(N(H)(F)))(H(N(H(A)))))))	sp|P01023|A2MG_HUMAN	1424
LPTQJITFQTESSVAEQEAEFQSPK	6 5 3 0 1	(N(N(H(H(N(F)(H(A))))(H(N(H(A)))(N(H(A)))))))	sp|Q14624|ITIH4_HUMAN	517
GCVLLSYLJETVTVSASLESVR	5 5 1 0 2	(N(F)(N(H(H(N(H(A))))(H(N)(N(H)(F))))))	sp|P01023|A2MG_HUMAN	55
LNAENJATFYFK	6 5 3 0 1	(N(N(H(H(N(F)(H(A))))(H(N(H(A)))(N(H(A)))))))	sp|P01042|KNG1_HUMAN	294
PALEDLLLGSEAJLTCTLTGLR	3 5 0 0 0	(N(N(H(N)(H(N)(N(H))))))	sp|P01876|IGHA1_HUMAN/sp|P0DOX2|IGA2_HUMAN/sp|P01877|IGHA2_HUMAN	144/246/131
TPLTAJITK	3 3 0 0 1	(N(F)(N(H(H)(H(N)))))	sp|P0DOX2|IGA2_HUMAN/sp|P01877|IGHA2_HUMAN	320/205
EEQYJSTYR	4 4 0 0 1	(N(F)(N(H(H(N))(H(N(H))))))	sp|P0DOX5|IGG1_HUMAN/sp|P01857|IGHG1_HUMAN	299/180
DFHSEYIVSASJFTSQLSSQVEQFLHR	5 4 2 0 0	(N(N(H(H(N(H(A))))(H(N(H(A)))))))	sp|P04114|APOB_HUMAN	4431
YLGJATAIFFLPDEGK	6 4 1 0 0	(N(N(H(H(H))(H(N(H))(N(H(A)))))))	sp|P01009|A1AT_HUMAN	271
IPCSQPPQIEHGTIJSSR	5 4 2 0 1	(N(F)(N(H(H(N(H(A))))(H(N(H(A)))))))	sp|P08603|CFAH_HUMAN	882
VCQDCPLLAPLJDTR	5 4 2 0 1	(N(F)(N(H(H(N(H(A))))(H(N(H(A)))))))	sp|P02765|FETUA_HUMAN	156
LSLHRPALEDLLLGSEAJLTCTLTGLR	5 5 0 0 0	(N(N(H(H(N))(H(N(H))(N(H))))))	sp|P01876|IGHA1_HUMAN/sp|P0DOX2|IGA2_HUMAN/sp|P01877|IGHA2_HUMAN	144/246/131
NJATVHEQVGGPSLTSDLQAQSK	5 4 2 0 0	(N(N(H(H(N(H(A))))(H(N(H(A)))))))	sp|P04004|VTNC_HUMAN	86
YTGJASALFILPDQDKMEEVEAMLLPETLK	6 5 3 0 0	(N(N(H(H(N(H(A))))(H(N(H(A)))(N(H(A)))))))	sp|P01011|AACT_HUMAN	271
FEVDSPVYJATWSASLK	6 5 3 0 1	(N(N(H(H(N(F)(H(A))))(H(N(H(A)))(N(H(A)))))))	sp|P04114|APOB_HUMAN	3895
PALEDLLLGSEAJLTCTLTGLR	5 5 1 0 1	(N(N(H(N)(H(N(H)(F)))(H(N(H(A)))))))	sp|P01876|IGHA1_HUMAN/sp|P0DOX2|IGA2_HUMAN/sp|P01877|IGHA2_HUMAN	144/246/131
KVCQDCPLLAPLJDTR	5 4 1 0 0	(N(N(H(H(N(H)))(H(N(H(A)))))))	sp|P02765|FETUA_HUMAN	156
TPLTAJITK	4 5 1 0 1	(N(F)(N(H(N)(H(N(H))(N(H(A)))))))	sp|P0DOX2|IGA2_HUMAN/sp|P01877|IGHA2_HUMAN	320/205
LSLHRPALEDLLLGSEAJLTCTLTGLR	6 5 1 0 0	(N(N(H(H(N(H(A))))(H(N(H))(N(H))))))	sp|P01876|IGHA1_HUMAN/sp|P0DOX2|IGA2_HUMAN/sp|P01877|IGHA2_HUMAN	144/246/131
YTGJASALFILPDQDK	6 5 3 0 0	(N(N(H(H(N(H(A))))(H(N(H(A)))(N(H(A)))))))	sp|P01011|AACT_HUMAN	271
LGHCPDPVLVNGEFSSSGPVJVSDK	5 4 2 0 0	(N(N(H(H(N(H(A))))(H(N(H(A)))))))	sp|P20851|C4BPB_HUMAN	98
APDKNVIFSPLSISTALAFLSLGAHJTTLTEILK	6 5 3 0 0	(N(N(H(H(N(H(A))))(H(N(H(A)))(N(H(A)))))))	sp|P01011|AACT_HUMAN	93
QDQCIYJTTYLNVQR	8 7 4 0 0	(N(N(H(H(N(H(A)))(N(H(A))))(H(N(H(A)))(N(H(N(H(A)))))))))	sp|P02763|A1AG1_HUMAN	93
ADTHDEILEGLNFJLTEIPEAQIHEGFQELLR	6 5 3 0 2	(N(F)(N(H(H(N(F)(H(A))))(H(N(H(A)))(N(H(A)))))))	sp|P01009|A1AT_HUMAN	107
TIHDLHLFIENIDFJK	5 4 2 0 0	(N(N(H(H(N(H(A))))(H(N(H(A)))))))	sp|P04114|APOB_HUMAN	2239
EJLTAPGSDSAVFFEQGTTR	6 4 1 0 1	(N(N(H(H(N(H(H))))(H(N(F)(H(A)))))))	sp|P00450|CERU_HUMAN	397
QDQCIYJTTYLNVQR	7 6 2 0 1	(N(N(H(H(N(H))(N(H(A))))(H(N(H)(F))(N(H(A)))))))	sp|P02763|A1AG1_HUMAN	93
AVLQLNEEGVDTAGSTGVTLJLTSKPIILR	6 5 3 0 1	(N(N(H(H(N(F)(H(A))))(H(N(H(A)))(N(H(A)))))))	sp|P08185|CBG_HUMAN	369
ITYSIVQTJCSKENFLFLTPDCK	6 5 3 0 1	(N(N(H(H(N(F)(H(A))))(H(N(H(A)))(N(H(A)))))))	sp|P01042|KNG1_HUMAN	205
ADTHDEILEGLNFJLTEIPEAQIHEGFQELLR	5 4 2 0 1	(N(N(H(H(N(H(A))))(H(N(F)(H(A)))))))	sp|P01009|A1AT_HUMAN	107
PALEDLLLGSEAJLTCTLTGLR	5 4 1 0 1	(N(N(H(H(N(H)(F)))(H(N(H(A)))))))	sp|P01876|IGHA1_HUMAN/sp|P0DOX2|IGA2_HUMAN/sp|P01877|IGHA2_HUMAN	144/246/131
DKICDLLVANNHFAHFFAPQJLTNMNK	5 4 1 0 2	(N(N(H(H(N(H)(F)))(H(N(F)(H(A)))))))	sp|P19827|ITIH1_HUMAN	285
TMFPJLTDVR	5 4 2 0 0	(N(N(H(H(N(H(A))))(H(N(H(A)))))))	sp|P06681|CO2_HUMAN	651
QDQCIYJTTYLNVQR	9 8 1 0 2	(N(F)(N(H(N)(H(N(H)(F))(N(H(H))))(H(N(H))(N(H(N(H(A)))))))))	sp|P02763|A1AG1_HUMAN	93
ELHHLQEQJVSNAFLDK	6 5 3 0 2	(N(F)(N(H(H(N(F)(H(A))))(H(N(H(A)))(N(H(A)))))))	sp|P00450|CERU_HUMAN	762
NLFLJHSEJATAK	5 4 1 0 0	(N(N(H(H(N(H)))(H(N(H(A)))))))	sp|P00739|HPTR_HUMAN/sp|P00738|HPT_HUMAN	149/207
SWPAVGJCSSALR	6 5 2 0 1	(N(F)(N(H(H(N(H(A))))(H(N(H(N(H(A)))))))))	sp|P02790|HEMO_HUMAN	187
VTQJLTLIEESLTSEFIHDIDR	5 4 2 0 0	(N(N(H(H(N(H(A))))(H(N(H(A)))))))	sp|P36955|PEDF_HUMAN	285
JLTVSVHVSPVEGLCLAGGGGLAQQVLVPAGSAR	5 4 2 0 0	(N(N(H(H(N(H(A))))(H(N(H(A)))))))	sp|P0C0L4|CO4A_HUMAN/sp|P0C0L5|CO4B_HUMAN	862/862
STGKPTLYJVSLVMSDTAGTCY	9 2 0 0 0	(N(N(H(H(H)(H))(H(H)(H(H(H)))))))	sp|P0DOX6|IGM_HUMAN/sp|P01871|IGHM_HUMAN	563/440
AGLQAFFQVQECJK	6 5 3 0 1	(N(N(H(H(N(F)(H(A))))(H(N(H(A)))(N(H(A)))))))	sp|P00450|CERU_HUMAN	358
MLJTSSLLEQLNEQFNWVSR	5 4 1 0 2	(N(N(H(H(N(H)(F)))(H(N(F)(H(A)))))))	sp|P10909|CLUS_HUMAN	354
VTQJLTLIEESLTSEFIHDIDR	5 4 2 0 1	(N(F)(N(H(H(N(H(A))))(H(N(H(A)))))))	sp|P36955|PEDF_HUMAN	285
SYJETK	5 4 2 0 0	(N(N(H(H(N(H(A))))(H(N(H(A)))))))	sp|P04114|APOB_HUMAN	3224
HJGTVECK	5 4 1 0 2	(N(N(H(H(N(H)(F)))(H(N(F)(H(A)))))))	sp|P10721|KIT_HUMAN	486
GLJVTLSSTGR	5 4 2 0 0	(N(N(H(H(N(H(A))))(H(N(H(A)))))))	sp|P0C0L4|CO4A_HUMAN/sp|P0C0L5|CO4B_HUMAN	1328/1328
KKEDALJETR	6 5 3 0 0	(N(N(H(N(H(A)))(H(N(H(A))))(H(N(H(A)))))))	sp|P10909|CLUS_HUMAN	86
LQAPLJYTEFQKPICLPSK	6 5 3 0 0	(N(N(H(H(N(H(A))))(H(N(H(A)))(N(H(A)))))))	sp|P03952|KLKB1_HUMAN	494
EJGTVSR	7 6 4 0 1	(N(N(H(H(N(H(A)))(N(H(A))))(H(N(H(A)))(N(F)(H(A)))))))	sp|P19652|A1AG2_HUMAN	103
SLGNVJFTVSAEALESQELCGTEVPSVPEHGRK	4 4 1 0 0	(N(N(H(H)(N)(H(N(H(A)))))))	sp|P01023|A2MG_HUMAN	869
AALAAFNAQNJGSNFQLEEISR	5 4 1 0 1	(N(F)(N(H(H(N(H)))(H(N(H(A)))))))	sp|P02765|FETUA_HUMAN	176
TLFCJASK	5 4 2 0 0	(N(N(H(H(N(H(A))))(H(N(H(A)))))))	sp|P20851|C4BPB_HUMAN	64
YKJNSDISSTR	4 3 1 0 1	(N(F)(N(H(H)(H(N(H(A)))))))	sp|P01871|IGHM_HUMAN	46
SLGNVJFTVSAEALESQELCGTEVPSVPEHGR	4 4 0 0 0	(N(N(H(H(N))(H(N(H))))))	sp|P01023|A2MG_HUMAN	869
WSDIWJATK	5 4 2 0 0	(N(N(H(H(N(H(A))))(H(N(H(A)))))))	sp|P06276|CHLE_HUMAN	85
DTFVJASR	5 4 2 0 1	(N(F)(N(H(H(N(H(A))))(H(N(H(A)))))))	sp|P05155|IC1_HUMAN	238
GLJVTLSSTGR	5 4 2 0 1	(N(F)(N(H(H(N(H(A))))(H(N(H(A)))))))	sp|P0C0L4|CO4A_HUMAN/sp|P0C0L5|CO4B_HUMAN	1328/1328
AQLLQGLGFJLTER	6 5 2 0 0	(N(N(H(H(N(H(A))))(H(N(H))(N(H(A)))))))	sp|P08185|CBG_HUMAN	96
DTFVJASR	5 4 1 0 1	(N(F)(N(H(H(N(H)))(H(N(H(A)))))))	sp|P05155|IC1_HUMAN	238
VIDFJCTTSSVSSALANTK	5 4 1 0 0	(N(N(H(H(H))(H(N)(N(H(A)))))))	sp|P04196|HRG_HUMAN	125
FJLTETSEAEIHQSFQHLLR	7 6 2 0 2	(N(N(H(H(N(H))(N(F)(H(A))))(H(N(H)(F))(N(H(A)))))))	sp|P01011|AACT_HUMAN	106
PALEDLLLGSEAJLTCTLTGLR	3 4 0 0 0	(N(N(H(H(N))(H(N)))))	sp|P01876|IGHA1_HUMAN/sp|P0DOX2|IGA2_HUMAN/sp|P01877|IGHA2_HUMAN	144/246/131
HGVIISSTVDTYEJGSSVEYR	6 5 3 0 1	(N(N(H(H(N(F)(H(A))))(H(N(H(A)))(N(H(A)))))))	sp|P05160|F13B_HUMAN	545
JVSCPQLEVPVCPSGFQLSCK	5 4 2 0 1	(N(F)(N(H(H(N(H(A))))(H(N(H(A)))))))	sp|P04275|VWF_HUMAN	2546
CMWSSALNSLJLSFAGLEQVPK	9 2 0 0 0	(N(N(H(H(H(H))(H(H(H(H(H)))))))))	sp|P08571|CD14_HUMAN	282
SLGNVJFTVSAEALESQELCGTEVPSVPEHGR	6 2 0 0 0	(N(N(H(H)(H(H(H(H)))))))	sp|P01023|A2MG_HUMAN	869
AVJITSENLIDDVVSLIR	5 4 1 0 0	(N(N(H(H(N(H)))(H(N(H(A)))))))	sp|P02748|CO9_HUMAN	415
VJLSFDFPFYGHFLR	5 4 2 0 1	(N(F)(N(H(H(N(H(A))))(H(N(H(A)))))))	sp|Q6UX71|PXDC2_HUMAN	160
LSLHRPALEDLLLGSEAJLTCTLTGLR	5 3 1 0 0	(N(N(H(H(H))(H(N(H(A)))))))	sp|P01876|IGHA1_HUMAN/sp|P0DOX2|IGA2_HUMAN/sp|P01877|IGHA2_HUMAN	144/246/131
FSDGLESJSSTQFEVK	9 2 0 0 0	(N(N(H(H)(H(H)(H(H(H(H(H)))))))))	sp|P0C0L4|CO4A_HUMAN/sp|P0C0L5|CO4B_HUMAN	226/226
DTFVJASR	6 5 3 0 0	(N(N(H(H(N(H(A))))(H(N(H(A)))(N(H(A)))))))	sp|P05155|IC1_HUMAN	238
GFGVAIVGJYTAALPTEAALR	6 5 3 0 0	(N(N(H(H(N(H(A))))(H(N(H(A)))(N(H(A)))))))	sp|Q96PD5|PGRP2_HUMAN	485
IPCSQPPQIEHGTIJSSR	6 5 3 0 0	(N(N(H(H(N(H(A))))(H(N(H(A)))(N(H(A)))))))	sp|P08603|CFAH_HUMAN	882
YKJNSDISSTR	5 3 1 0 1	(N(F)(N(H(H(H))(H(N(H(A)))))))	sp|P01871|IGHM_HUMAN	46
VSJQTLSLFFTVLQDVPVR	6 4 1 0 0	(N(N(H(H(H))(H(N(H))(N(H(A)))))))	sp|P01023|A2MG_HUMAN	1424
QSVPAHFVALJGSK	5 2 0 0 0	(N(N(H(H(H))(H(H)))))	sp|P06681|CO2_HUMAN	621
VDKDLQSLEDILHQVEJK	3 3 0 0 0	(N(N(H(H)(H(N)))))	sp|P02679|FIBG_HUMAN	78
NAHGEEKEJLTAR	5 4 2 0 0	(N(N(H(H(N(H(A))))(H(N(H(A)))))))	sp|Q06033|ITIH3_HUMAN	580
LSLHRPALEDLLLGSEAJLTCTLTGLR	6 5 1 0 0	(N(N(H(H(N(H)))(H(N(H))(N(H(A)))))))	sp|P01876|IGHA1_HUMAN/sp|P0DOX2|IGA2_HUMAN/sp|P01877|IGHA2_HUMAN	144/246/131
TVLTPATNHMGJVTFTIPANR	6 2 0 0 0	(N(N(H(H)(H(H)(H(H))))))	sp|P01024|CO3_HUMAN	85
AALAAFNAQNJGSNFQLEEISR	6 5 2 0 1	(N(N(H(H(N(H)(F)))(H(N(H(A)))(N(H(A)))))))	sp|P02765|FETUA_HUMAN	176
VPVTLALJNTLFLIEER	5 4 2 0 0	(N(N(H(H(N(H(A))))(H(N(H(A)))))))	sp|P15144|AMPN_HUMAN	681
LAJLTQGEDQYYLR	6 5 4 0 0	(N(N(H(H(N(H(A))))(H(N(H(A)))(N(H(A)(A)))))))	sp|P10909|CLUS_HUMAN	374
MLJTSSLLEQLNEQFNWVSR	5 4 1 0 0	(N(N(H(H(N(H)))(H(N(H(A)))))))	sp|P10909|CLUS_HUMAN	354
SVQEIQATFFYFTPJKTEDTIFLR	6 5 2 0 1	(N(N(H(H(N(F)(H(A))))(H(N(H))(N(H(A)))))))	sp|P02763|A1AG1_HUMAN/sp|P19652|A1AG2_HUMAN	72/72
VDKDLQSLEDILHQVEJK	2 3 0 0 0	(N(N(H(H(N)))))	sp|P02679|FIBG_HUMAN	78
FEVDSPVYJATWSASLK	5 4 1 0 0	(N(N(H(H(N(H)))(H(N(H(A)))))))	sp|P04114|APOB_HUMAN	3895
VSJQTLSLFFTVLQDVPVR	5 5 0 0 1	(N(F)(N(H(H(N(H)))(H(N)(N(H))))))	sp|P01023|A2MG_HUMAN	1424
VVLHPJYSQVDIGLIK	6 5 2 0 2	(N(N(H(H(N(F)(H(A))))(H(N(H)(F))(N(H(A)))))))	sp|P00738|HPT_HUMAN	241
SWPAVGJCSSALR	5 4 2 0 1	(N(N(H(H(N(H(A))))(H(N(F)(H(A)))))))	sp|P02790|HEMO_HUMAN	187
AFITJFSMIIDGMTYPGIIK	5 4 2 0 1	(N(N(H(H(N(H(A))))(H(N(F)(H(A)))))))	sp|Q14624|ITIH4_HUMAN	81
GTAGNALMDGASQLMGEJR	4 3 1 0 0	(N(N(H(H)(H(N(H(A)))))))	sp|P02675|FIBB_HUMAN	394
FEVDSPVYJATWSASLK	6 5 2 0 1	(N(N(H(H(N(H)(F)))(H(N(H(A)))(N(H(A)))))))	sp|P04114|APOB_HUMAN	3895
TPLTAJITK	5 5 0 0 1	(N(F)(N(H(N)(H(N(H)))(H(N(H))))))	sp|P0DOX2|IGA2_HUMAN/sp|P01877|IGHA2_HUMAN	320/205
VVLHPJYSQVDIGLIK	6 5 3 0 2	(N(N(H(H(N(F)(H(A))))(H(N(H(A)))(N(F)(H(A)))))))	sp|P00738|HPT_HUMAN	241
AFNKFSJLTQHK	6 3 2 0 1	(N(N(H(H(H)(H))(H(N(F)(H(A(A))))))))	sp|Q5SXM1|ZN678_HUMAN	251
YAEDKFJETTEK	6 5 3 0 0	(N(N(H(H(N(H(A))))(H(N(H(A)))(N(H(A)))))))	sp|P43652|AFAM_HUMAN	402
EEQFJSTYR	4 5 1 0 1	(N(F)(N(H(N)(H(N(H))(N(H(A)))))))	sp|P01861|IGHG4_HUMAN	177
EEQFJSTYR	5 4 0 0 1	(N(F)(N(H(H(N(H)))(H(N(H))))))	sp|P01861|IGHG4_HUMAN	177
DTFVJASR	5 4 2 0 0	(N(N(H(H(N(H(A))))(H(N(H(A)))))))	sp|P05155|IC1_HUMAN	238
SWPAVGJCSSALR	6 5 3 0 0	(N(N(H(H(N(H(A))))(H(N(H(A)))(N(H(A)))))))	sp|P02790|HEMO_HUMAN	187
EFLVJSSR	5 4 2 0 0	(N(N(H(H(N(H(A))))(H(N(H(A)))))))	sp|O75031|HSF2B_HUMAN	205
JYTLTGR	5 4 2 0 1	(N(F)(N(H(H(N(H(A))))(H(N(H(A)))))))	sp|P10643|CO7_HUMAN	754
VYKPSAGJNSLYR	5 4 2 0 1	(N(F)(N(H(H(N(H(A))))(H(N(H(A)))))))	sp|P02749|APOH_HUMAN	162
FVEGSHJSTVSLTTK	5 4 1 0 0	(N(N(H(H(N(H)))(H(N(H(A)))))))	sp|P04114|APOB_HUMAN	3411
JGTAVCATNRR	5 4 1 0 0	(N(N(H(H(N(H)))(H(N(H(A)))))))	sp|P05156|CFAI_HUMAN	70
SWPAVGJCSSALR	6 5 2 0 0	(N(N(H(H(N(H(A))))(H(N(H))(N(H(A)))))))	sp|P02790|HEMO_HUMAN	187
EJGTISR	7 6 4 0 2	(N(F)(N(H(H(N(H(A)))(N(H(A))))(H(N(H(A)))(N(F)(H(A)))))))	sp|P02763|A1AG1_HUMAN	103
GGSSGWSGGLAQJR	5 4 1 0 0	(N(N(H(H(N(H)))(H(N(H(A)))))))	sp|P07357|CO8A_HUMAN	437
LPTQJITFQTESSVAEQEAEFQSPK	6 5 2 0 0	(N(N(H(H(N(H(A))))(H(N(H))(N(H(A)))))))	sp|Q14624|ITIH4_HUMAN	517
QJQCFYJSSYLNVQR	7 6 4 0 1	(N(F)(N(H(H(N(H(A(N(H(A)))))))(H(N(H(A(N(H(A))))))))))	sp|P19652|A1AG2_HUMAN	88
LSLHRPALEDLLLGSEAJLTCTLTGLR	4 5 1 0 0	(N(N(H(N)(H(N(H))(N(H(A)))))))	sp|P01876|IGHA1_HUMAN/sp|P0DOX2|IGA2_HUMAN/sp|P01877|IGHA2_HUMAN	144/246/131
FSDGLESJSSTQFEVK	9 2 0 0 0	(N(N(H(H(H)(H))(H(H(H))(H(H))))))	sp|P0C0L4|CO4A_HUMAN/sp|P0C0L5|CO4B_HUMAN	226/226
EEQFJSTFR	6 4 1 0 0	(N(N(H(H(H))(H(N(H))(N(H(A)))))))	sp|P01859|IGHG2_HUMAN	176
MLJTSSLLEQLNEQFNWVSR	6 5 2 0 0	(N(N(H(H(N(H(A))))(H(N(H))(N(H(A)))))))	sp|P10909|CLUS_HUMAN	354
YTGJASALFILPDQDKMEEVEAMLLPETLK	5 4 2 0 0	(N(N(H(H(N(H(A))))(H(N(H(A)))))))	sp|P01011|AACT_HUMAN	271
QJQCFYJSSYLNVQR	7 6 1 0 0	(N(N(H(H(N(H))(N(H)))(H(N(H))(N(H(A)))))))	sp|P19652|A1AG2_HUMAN	88
QQQHLFGSJVTDCSGJFCLFR	6 4 1 0 2	(N(N(H(H(H))(H(N(H)(F))(N(F)(H(A)))))))	sp|P02787|TRFE_HUMAN	630
MVSHHJLTTGATLINEQWLLTTAK	6 5 2 0 1	(N(F)(N(H(H(N(H(A))))(H(N(H(N(H(A)))))))))	sp|P00739|HPTR_HUMAN/sp|P00738|HPT_HUMAN	126/184
SLTFJETYQDISELVYGAK	5 4 1 0 1	(N(N(H(H(N(H)(F)))(H(N(H(A)))))))	sp|P01008|ANT3_HUMAN	187
YKJNSDISSTR	4 3 0 0 1	(N(F)(N(H(N)(H(H)(H)))))	sp|P01871|IGHM_HUMAN	46
IPCSQPPQIEHGTIJSSR	5 4 2 0 1	(N(N(H(H(N(H(A))))(H(N(F)(H(A)))))))	sp|P08603|CFAH_HUMAN	882
QSVPAHFVALJGSK	5 2 0 0 0	(N(N(H(H(H(H(H)))))))	sp|P06681|CO2_HUMAN	621
QVLFLDTVYGJCSTHFTVK	8 2 0 0 0	(N(N(H(H(H)(H))(H(H)(H(H))))))	sp|P04114|APOB_HUMAN	185
VDKDLQSLEDILHQVEJK	6 3 1 0 0	(N(N(H(H)(H(H)(H(N(H(A))))))))	sp|P02679|FIBG_HUMAN	78
QVLFLDTVYGJCSTHFTVK	5 2 0 0 0	(N(N(H(H(H(H(H)))))))	sp|P04114|APOB_HUMAN	185
EJISDPTSPLR	5 4 1 0 0	(N(N(H(H(N(H)))(H(N(H(A)))))))	sp|P01591|IGJ_HUMAN	71
GLTFQQJASSMCVPDQDTAIR	5 5 1 0 0	(N(N(H(H(N)(N(H)))(H(N(H(A)))))))	sp|P0DOX6|IGM_HUMAN/sp|P01871|IGHM_HUMAN	332/209
VVLHPJYSQVDIGLIK	7 6 2 0 1	(N(N(H(H(N(H))(N(H)(F)))(H(N(H(A)))(N(H(A)))))))	sp|P00738|HPT_HUMAN	241
LAJLTQGEDQYYLR	5 4 2 0 1	(N(N(H(H(N(H(A))))(H(N(F)(H(A)))))))	sp|P10909|CLUS_HUMAN	374
FVEGSHJSTVSLTTK	4 4 1 0 0	(N(N(H(H(N))(H(N(H(A)))))))	sp|P04114|APOB_HUMAN	3411
ALPQPQJVTSLLGCTH	6 4 1 0 1	(N(N(H(H(N(H(H))))(H(N(F)(H(A)))))))	sp|P02790|HEMO_HUMAN	453
SLGNVJFTVSAEALESQELCGTEVPSVPEHGR	4 2 0 0 0	(N(N(H(H)(H(H)))))	sp|P01023|A2MG_HUMAN	869
SVQEIQATFFYFTPJKTEDTIFLR	8 7 3 0 0	(N(N(H(H(N(H))(N(H(A))))(H(N(H(A)))(N(H(N(H(A)))))))))	sp|P02763|A1AG1_HUMAN/sp|P19652|A1AG2_HUMAN	72/72
QDQCIYJTTYLNVQR	5 4 3 0 3	(N(F)(N(H(H(N(F)(H(A))))(H(N(F)(H(A(A))))))))	sp|P02763|A1AG1_HUMAN	93
TPLTAJITK	3 3 0 0 1	(N(F)(N(H(H)(H)(N))))	sp|P0DOX2|IGA2_HUMAN/sp|P01877|IGHA2_HUMAN	320/205
QEPERJECFLQHK	5 4 2 0 0	(N(N(H(H(N(H(A))))(H(N(H(A)))))))	sp|P02768|ALBU_HUMAN	123
EEQYJSTYR	5 5 1 0 1	(N(F)(N(H(N)(H(N(H)))(H(N(H(A)))))))	sp|P0DOX5|IGG1_HUMAN/sp|P01857|IGHG1_HUMAN	299/180
QSVPAHFVALJGSK	6 3 1 0 0	(N(N(H(H)(H(H)(H(N(H(A))))))))	sp|P06681|CO2_HUMAN	621
CSDGWSFDATTLDDJGTMLFFK	5 4 1 0 0	(N(N(H(H(N(H)))(H(N(H(A)))))))	sp|P02790|HEMO_HUMAN	64
SVQEIQATFFYFTPJKTEDTIFLR	7 6 1 0 0	(N(N(H(H(N(H))(N(H)))(H(N(H))(N(H(A)))))))	sp|P02763|A1AG1_HUMAN/sp|P19652|A1AG2_HUMAN	72/72
EJLTAPGSDSAVFFEQGTTR	5 4 2 0 1	(N(F)(N(H(H(N(H(A))))(H(N(H(A)))))))	sp|P00450|CERU_HUMAN	397
STGKPTLYJVSLVMSDTAGTCY	7 2 0 0 0	(N(N(H(H(H)(H))(H(H)(H)))))	sp|P0DOX6|IGM_HUMAN/sp|P01871|IGHM_HUMAN	563/440
STGKPTLYJVSLVMSDTAGTCY	5 2 0 0 0	(N(N(H(H(H(H(H)))))))	sp|P0DOX6|IGM_HUMAN/sp|P01871|IGHM_HUMAN	563/440
GLTFQQJASSMCVPDQDTAIR	5 4 1 0 0	(N(N(H(H(N(H)))(H(N(H(A)))))))	sp|P0DOX6|IGM_HUMAN/sp|P01871|IGHM_HUMAN	332/209
PALEDLLLGSEAJLTCTLTGLR	5 5 2 0 0	(N(N(H(H(N(H(A))))(H(N)(N(H(A)))))))	sp|P01876|IGHA1_HUMAN/sp|P0DOX2|IGA2_HUMAN/sp|P01877|IGHA2_HUMAN	144/246/131
QDQCIYJTTYLNVQR	7 6 2 0 1	(N(N(H(H(N(H))(N(H)(F)))(H(N(H(A)))(N(H(A)))))))	sp|P02763|A1AG1_HUMAN	93
VVLHPJYSQVDIGLIK	6 4 2 0 0	(N(N(H(H(H))(H(N(H(A)))(N(H(A)))))))	sp|P00738|HPT_HUMAN	241
QDQCIYJTTYLNVQR	6 5 3 0 3	(N(N(H(H(N(F)(H(A))))(H(N(F)(H(A)))(N(F)(H(A)))))))	sp|P02763|A1AG1_HUMAN	93
TLJQSSDELQLSMGNAMFVK	6 5 1 0 0	(N(N(H(H(N(H(A))))(H(N(H))(N(H))))))	sp|P01011|AACT_HUMAN	127
PALEDLLLGSEAJLTCTLTGLR	6 2 0 0 0	(N(N(H(H(H))(H(H(H))))))	sp|P01876|IGHA1_HUMAN/sp|P0DOX2|IGA2_HUMAN/sp|P01877|IGHA2_HUMAN	144/246/131
TPLTAJITK	3 5 0 0 1	(N(F)(N(H(N)(H(N)(N(H))))))	sp|P0DOX2|IGA2_HUMAN/sp|P01877|IGHA2_HUMAN	320/205
GFLALYQTVAVJYSQPISEASR	5 4 2 0 1	(N(F)(N(H(H(N(H(A))))(H(N(H(A)))))))	sp|Q9NZP8|C1RL_HUMAN	166
LAGKPTHVJVSVVMAEVDGTCY	5 4 1 0 0	(N(N(H(H(N(H)))(H(N(H(A)))))))	sp|P01876|IGHA1_HUMAN	340
GPDVLTATVSGKLPTQJITFQTESSVAEQEAEFQSPK	5 4 2 0 0	(N(N(H(H(N(H(A))))(H(N(H(A)))))))	sp|Q14624|ITIH4_HUMAN	517
MVSHHJLTTGATLINEQWLLTTAK	6 5 1 0 0	(N(N(H(H(N(H(A))))(H(N(H))(N(H))))))	sp|P00739|HPTR_HUMAN/sp|P00738|HPT_HUMAN	126/184
JVTAEQAR	5 4 2 0 0	(N(N(H(H(N(H(A))))(H(N(H(A)))))))	sp|P00748|FA12_HUMAN	249
MVSHHJLTTGATLINEQWLLTTAK	5 4 2 0 1	(N(N(H(H(N(H(A))))(H(N(F)(H(A)))))))	sp|P00739|HPTR_HUMAN/sp|P00738|HPT_HUMAN	126/184
AJISHK	5 4 2 0 1	(N(F)(N(H(H(N(H(A))))(H(N(H(A)))))))	sp|Q14940|SL9A5_HUMAN/sp|P01031|CO5_HUMAN/sp|P19634|SL9A1_HUMAN	319/741/370
CJYSIR	5 4 1 0 0	(N(N(H(H(N(H)))(H(N(H(A)))))))	sp|P00736|C1R_HUMAN	221
LQAPLJYTEFQKPICLPSK	5 4 2 0 1	(N(F)(N(H(H(N(H(A))))(H(N(H(A)))))))	sp|P03952|KLKB1_HUMAN	494
EEQFJSTFR	4 5 0 0 1	(N(F)(N(H(N)(H(N))(H(N(H))))))	sp|P01859|IGHG2_HUMAN	176
SVQEIQATFFYFTPJKTEDTIFLR	6 5 3 0 2	(N(N(H(H(N(F)(H(A))))(H(N(H(A)))(N(F)(H(A)))))))	sp|P02763|A1AG1_HUMAN/sp|P19652|A1AG2_HUMAN	72/72
LPPGLLAJFTLLR	5 4 2 0 0	(N(N(H(H(N(H(A))))(H(N(H(A)))))))	sp|P02750|A2GL_HUMAN	186
KEDALJETR	6 5 3 0 0	(N(N(H(H(N(H(A))))(H(N(H(A)))(N(H(A)))))))	sp|P10909|CLUS_HUMAN	86
QVHFFVJASDVDNVK	6 5 3 0 0	(N(N(H(H(N(H(A))))(H(N(H(A)))(N(H(A)))))))	sp|Q96IY4|CBPB2_HUMAN	73
KEDALJETR	6 5 3 0 1	(N(N(H(H(N(F)(H(A))))(H(N(H(A)))(N(H(A)))))))	sp|P10909|CLUS_HUMAN	86
QVLFLDTVYGJCSTHFTVK	8 2 0 0 0	(N(N(H(H(H))(H(H)(H(H(H)))))))	sp|P04114|APOB_HUMAN	185
PALEDLLLGSEAJLTCTLTGLR	3 5 0 0 0	(N(N(H(N)(H(N))(H(N)))))	sp|P01876|IGHA1_HUMAN/sp|P0DOX2|IGA2_HUMAN/sp|P01877|IGHA2_HUMAN	144/246/131
LSLHRPALEDLLLGSEAJLTCTLTGLR	4 5 1 0 1	(N(N(H(H(N)(N(F)))(H(N(H(A)))))))	sp|P01876|IGHA1_HUMAN/sp|P0DOX2|IGA2_HUMAN/sp|P01877|IGHA2_HUMAN	144/246/131
EJGTISR	7 6 5 0 0	(N(N(H(H(N(H(A)))(N(H(A))))(H(N(H(A)))(N(H(A(A))))))))	sp|P02763|A1AG1_HUMAN	103
LPTQJITFQTESSVAEQEAEFQSPK	6 5 3 0 1	(N(F)(N(H(H(N(H(A))))(H(N(H(A)))(N(H(A)))))))	sp|Q14624|ITIH4_HUMAN	517
CSDGWSFDATTLDDJGTMLFFK	5 4 2 0 1	(N(F)(N(H(H(N(H(A))))(H(N(H(A)))))))	sp|P02790|HEMO_HUMAN	64
FSDGLESJSSTQFEVK	7 2 0 0 0	(N(N(H(H(H(H))(H(H(H)))))))	sp|P0C0L4|CO4A_HUMAN/sp|P0C0L5|CO4B_HUMAN	226/226
SLGNVJFTVSAEALESQELCGTEVPSVPEHGR	7 2 0 0 0	(N(N(H(H(H)(H(H(H(H))))))))	sp|P01023|A2MG_HUMAN	869
LSLHRPALEDLLLGSEAJLTCTLTGLR	5 5 1 0 1	(N(F)(N(H(H(N)(N(H)))(H(N(H(A)))))))	sp|P01876|IGHA1_HUMAN/sp|P0DOX2|IGA2_HUMAN/sp|P01877|IGHA2_HUMAN	144/246/131
SQILEGLGFJLTELSESDVHR	6 5 3 0 1	(N(N(H(H(N(F)(H(A))))(H(N(H(A)))(N(H(A)))))))	sp|P29622|KAIN_HUMAN	108
STGKPTLYJVSLVMSDTAGTCY	6 2 0 0 0	(N(N(H(H(H(H))(H(H))))))	sp|P0DOX6|IGM_HUMAN/sp|P01871|IGHM_HUMAN	563/440
JGSLFAFR	4 3 1 0 0	(N(N(H(H)(H(N(H(A)))))))	sp|P04004|VTNC_HUMAN	169
LAGKPTHVJVSVVMAEVDGTCY	5 4 2 0 0	(N(N(H(H(N(H(A))))(H(N(H(A)))))))	sp|P01876|IGHA1_HUMAN	340
SVQEIQATFFYFTPJKTEDTIFLR	6 5 2 0 3	(N(N(H(N)(H(N(F)(H(H))))(H(N(F)(H(F)(A(A))))))))	sp|P02763|A1AG1_HUMAN/sp|P19652|A1AG2_HUMAN	72/72
VDKDLQSLEDILHQVEJK	5 5 1 0 0	(N(N(H(H(N)(N(H)))(H(N(H(A)))))))	sp|P02679|FIBG_HUMAN	78
QDQCIYJTTYLNVQR	6 5 2 0 1	(N(N(H(H(N(F)(H(A))))(H(N(H))(N(H(A)))))))	sp|P02763|A1AG1_HUMAN	93
QLAHQSJSTNIFFSPVSIATAFAMLSLGTK	6 5 2 0 1	(N(F)(N(H(H(N(H(A))))(H(N(H(N(H(A)))))))))	sp|P01009|A1AT_HUMAN	70
AVJITSENLIDDVVSLIR	6 5 3 0 1	(N(N(H(H(N(F)(H(A))))(H(N(H(A)))(N(H(A)))))))	sp|P02748|CO9_HUMAN	415
STGKPTLYJVSLVMSDTAGTCY	7 2 0 0 0	(N(N(H(H(H(H)))(H(H(H))))))	sp|P0DOX6|IGM_HUMAN/sp|P01871|IGHM_HUMAN	563/440
TLJQSSDELQLSMGNAMFVK	7 6 1 0 0	(N(N(H(H(N(H))(N(H)))(H(N(H))(N(H(A)))))))	sp|P01011|AACT_HUMAN	127
STGKPTLYJVSLVMSDTAGTCY	6 2 0 0 0	(N(N(H(H)(H(H(H(H)))))))	sp|P0DOX6|IGM_HUMAN/sp|P01871|IGHM_HUMAN	563/440
AFITJFSMIIDGMTYPGIIK	6 5 3 0 0	(N(N(H(H(N(H(A))))(H(N(H(A)))(N(H(A)))))))	sp|Q14624|ITIH4_HUMAN	81
VYLQGLIDCYLFGJSSTVLEDSK	4 3 1 0 0	(N(N(H(H)(H(N(H(A)))))))	sp|P35542|SAA4_HUMAN	94
QSVPAHFVALJGSK	5 2 0 0 0	(N(N(H(H)(H(H(H))))))	sp|P06681|CO2_HUMAN	621
VVLHPJYSQVDIGLIK	7 6 3 0 2	(N(N(H(H(N(H)(F))(N(H(A))))(H(N(H(A)))(N(F)(H(A)))))))	sp|P00738|HPT_HUMAN	241
GCVLLSYLJETVTVSASLESVR	6 5 1 0 1	(N(F)(N(H(H(N(H(A))))(H(H(N))(H(N))))))	sp|P01023|A2MG_HUMAN	55
JNSDISSTR	5 5 1 0 1	(N(F)(N(H(N)(H(N(H)))(H(N(H(A)))))))	sp|P01871|IGHM_HUMAN	46
EJGTISR	6 5 3 0 2	(N(N(H(H(N(F)(H(A))))(H(N(H(A)))(N(F)(H(A)))))))	sp|P02763|A1AG1_HUMAN	103
EEQYJSTYR	5 5 0 0 1	(N(F)(N(H(N)(H(N(H)))(H(N(H))))))	sp|P0DOX5|IGG1_HUMAN/sp|P01857|IGHG1_HUMAN	299/180
QQQHLFGSJVTDCSGJFCLFR	5 4 1 0 3	(N(N(H(H(N(F)(H(A))))(H(N(F)(H(F)))))))	sp|P02787|TRFE_HUMAN	630
LAGKPTHVJVSVVMAEVDGTCY	4 5 1 0 1	(N(F)(N(H(N)(H(N))(H(N(H(A)))))))	sp|P01876|IGHA1_HUMAN	340
AFITJFSMIIDGMTYPGIIK	6 5 3 0 1	(N(N(H(H(N(F)(H(A))))(H(N(H(A)))(N(H(A)))))))	sp|Q14624|ITIH4_HUMAN	81
KAFITJFSMIIDGMTYPGIIK	6 5 3 0 0	(N(N(H(H(N(H(A))))(H(N(H(A)))(N(H(A)))))))	sp|Q14624|ITIH4_HUMAN	81
SVVAPATDGGLJLTSTFLR	5 4 1 0 1	(N(F)(N(H(H(N(H)))(H(N(H(A)))))))	sp|P41222|PTGDS_HUMAN	78
VTQVYAEJGTVLQGSTVASVYK	5 4 2 0 0	(N(N(H(H(N(H(A))))(H(N(H(A)))))))	sp|P27169|PON1_HUMAN	324
AQLLQGLGFJLTER	5 4 2 0 0	(N(N(H(H(N(H(A))))(H(N(H(A)))))))	sp|P08185|CBG_HUMAN	96
VVLHPJYSQVDIGLIK	8 6 2 0 3	(N(N(H(H(N(H))(N(F)(H(H))))(H(N(F)(H(A)))(N(F)(H(A)))))))	sp|P00738|HPT_HUMAN	241
VVLHPJYSQVDIGLIK	7 6 1 0 0	(N(N(H(H(N(H))(N(H)))(H(N(H))(N(H(A)))))))	sp|P00738|HPT_HUMAN	241
VLJFTTK	5 4 2 0 0	(N(N(H(H(N(H(A))))(H(N(H(A)))))))	sp|P13671|CO6_HUMAN	324
NJATVHEQVGGPSLTSDLQAQSK	5 4 2 0 1	(N(N(H(H(N(H(A))))(H(N(F)(H(A)))))))	sp|P04004|VTNC_HUMAN	86
IIEGEPNLKVPGJVTAVLGETLK	5 4 2 0 0	(N(N(H(H(N(H(A))))(H(N(H(A)))))))	sp|P01833|PIGR_HUMAN	469
VDKDLQSLEDILHQVEJK	5 4 1 0 1	(N(N(H(H(N(H)))(H(N(F)(H(A)))))))	sp|P02679|FIBG_HUMAN	78
KLPPGLLAJFTLLR	5 4 2 0 1	(N(F)(N(H(H(N(H(A))))(H(N(H(A)))))))	sp|P02750|A2GL_HUMAN	186
JNSDISSTR	5 4 1 0 1	(N(F)(N(H(H(N(H)))(H(N(H(A)))))))	sp|P01871|IGHM_HUMAN	46
HJSTGCLR	6 5 2 0 0	(N(N(H(H(N(H(A))))(H(N(H))(N(H(A)))))))	sp|P10909|CLUS_HUMAN	291
IPCSQPPQIEHGTIJSSR	5 4 1 0 1	(N(F)(N(H(H(N(H)))(H(N(H(A)))))))	sp|P08603|CFAH_HUMAN	882
JGSLFAFR	5 4 1 0 0	(N(N(H(H(N(H)))(H(N(H(A)))))))	sp|P04004|VTNC_HUMAN	169
EEQFJSTYR	5 4 1 0 1	(N(F)(N(H(H(N(H)))(H(N(H(A)))))))	sp|P01861|IGHG4_HUMAN	177
JISDGFDGIPDNVDAALALPAHSYSGR	6 5 3 0 1	(N(F)(N(H(H(N(H(A))))(H(N(H(A)))(N(H(A)))))))	sp|P04004|VTNC_HUMAN	242
TPLTAJITK	6 5 1 0 1	(N(N(H(H(N(H)(F)))(H(N(H(N(H(A)))))))))	sp|P0DOX2|IGA2_HUMAN/sp|P01877|IGHA2_HUMAN	320/205
STGKPTLYJVSLVMSDTAGTCY	7 2 0 0 0	(N(N(H(H(H(H))(H(H(H)))))))	sp|P0DOX6|IGM_HUMAN/sp|P01871|IGHM_HUMAN	563/440
AGLQAFFQVQECJK	6 5 3 0 0	(N(N(H(H(N(H(A))))(H(N(H(A)))(N(H(A)))))))	sp|P00450|CERU_HUMAN	358
AAIPSALDTJSSK	5 4 1 0 0	(N(N(H(H(N(H)))(H(N(H(A)))))))	sp|Q08380|LG3BP_HUMAN	551
GLTFQQJASSMCVPDQDTAIR	6 5 2 0 1	(N(F)(N(H(H(N(H(A))))(H(N(H(N(H(A)))))))))	sp|P0DOX6|IGM_HUMAN/sp|P01871|IGHM_HUMAN	332/209
LSLHRPALEDLLLGSEAJLTCTLTGLR	4 4 1 0 0	(N(N(H(H(N))(H(N(H(A)))))))	sp|P01876|IGHA1_HUMAN/sp|P0DOX2|IGA2_HUMAN/sp|P01877|IGHA2_HUMAN	144/246/131
YTGJASALFILPDQDKMEEVEAMLLPETLK	7 6 4 0 0	(N(N(H(H(N(H(A)))(N(H(A))))(H(N(H(A)))(N(H(A)))))))	sp|P01011|AACT_HUMAN	271
JNSDISSTR	4 3 1 0 0	(N(N(H(H)(H(N(H(A)))))))	sp|P01871|IGHM_HUMAN	46
NEEYJK	6 5 3 0 2	(N(F)(N(H(H(N(F)(H(A))))(H(N(H(A)))(N(H(A)))))))	sp|P02763|A1AG1_HUMAN/sp|P19652|A1AG2_HUMAN	56/56
JCCNTENPPGCYR	5 4 2 0 0	(N(N(H(H(N(H(A))))(H(N(H(A)))))))	sp|P43652|AFAM_HUMAN	383
TVLTPATNHMGJVTFTIPANR	7 2 0 0 0	(N(N(H(H)(H(H(H))(H(H))))))	sp|P01024|CO3_HUMAN	85
FJSSYLQGTNQITGR	5 2 0 0 0	(N(N(H(H(H)(H(H))))))	sp|P04114|APOB_HUMAN	1523
VPGJVTAVLGETLK	5 4 2 0 0	(N(N(H(H(N(H(A))))(H(N(H(A)))))))	sp|P01833|PIGR_HUMAN	469
QQQHLFGSJVTDCSGJFCLFR	6 5 2 0 2	(N(F)(N(H(H(N(H)(F)))(H(N(H(A)))(N(H(A)))))))	sp|P02787|TRFE_HUMAN	630
QDQCIYJTTYLNVQR	7 6 4 0 2	(N(N(H(H(N(H(A)))(N(F)(H(A))))(H(N(H(A)))(N(F)(H(A)))))))	sp|P02763|A1AG1_HUMAN	93
JISDGFDGIPDNVDAALALPAHSYSGR	6 5 3 0 2	(N(N(H(H(N(F)(H(A))))(H(N(H(A)))(N(F)(H(A)))))))	sp|P04004|VTNC_HUMAN	242
VSJQTLSLFFTVLQDVPVR	6 4 1 0 1	(N(N(H(H(N(H(H))))(H(N(F)(H(A)))))))	sp|P01023|A2MG_HUMAN	1424
STGKPTLYJVSLVMSDTAGTCY	7 2 0 0 0	(N(N(H(H)(H(H(H))(H(H))))))	sp|P0DOX6|IGM_HUMAN/sp|P01871|IGHM_HUMAN	563/440
PALEDLLLGSEAJLTCTLTGLR	4 5 1 0 0	(N(N(H(N)(H(N))(H(N(H(A)))))))	sp|P01876|IGHA1_HUMAN/sp|P0DOX2|IGA2_HUMAN/sp|P01877|IGHA2_HUMAN	144/246/131
SVQEIQATFFYFTPJK	7 6 2 0 0	(N(N(H(H(N(H))(N(H(A))))(H(N(H))(N(H(A)))))))	sp|P02763|A1AG1_HUMAN/sp|P19652|A1AG2_HUMAN	72/72
YLGJATAIFFLPDEGK	5 4 1 0 2	(N(N(H(H(N(H)(F)))(H(N(F)(H(A)))))))	sp|P01009|A1AT_HUMAN	271
QVLFLDTVYGJCSTHFTVK	4 2 0 0 0	(N(N(H(H(H)(H)))))	sp|P04114|APOB_HUMAN	185
AFEJVTDLQWLILDHNLLENSK	6 5 2 0 1	(N(F)(N(H(H(N(H(A))))(H(N(H(N(H(A)))))))))	sp|P51884|LUM_HUMAN	88
LAJLTQGEDQYYLR	6 5 4 0 0	(N(N(H(H(N(H(A))))(H(N(H(A)))(N(A)(H(A)))))))	sp|P10909|CLUS_HUMAN	374
LSLHRPALEDLLLGSEAJLTCTLTGLR	5 5 0 0 0	(N(N(H(N)(H(N(H)))(H(N(H))))))	sp|P01876|IGHA1_HUMAN/sp|P0DOX2|IGA2_HUMAN/sp|P01877|IGHA2_HUMAN	144/246/131
ADTHDEILEGLNFJLTEIPEAQIHEGFQELLR	6 4 2 0 0	(N(N(H(H(N(H(A))))(H(N(H(H)(A)))))))	sp|P01009|A1AT_HUMAN	107
SLGNVJFTVSAEALESQELCGTEVPSVPEHGR	5 4 0 0 0	(N(N(H(N)(H(H))(H(N(H))))))	sp|P01023|A2MG_HUMAN	869
FSDGLESJSSTQFEVK	10 2 0 0 0	(N(N(H(H)(H(H(H(H(H(H(H(H)))))))))))	sp|P0C0L4|CO4A_HUMAN/sp|P0C0L5|CO4B_HUMAN	226/226
QVLFLDTVYGJCSTHFTVK	4 2 0 0 0	(N(N(H(H)(H(H)))))	sp|P04114|APOB_HUMAN	185
PALEDLLLGSEAJLTCTLTGLR	3 3 0 0 0	(N(N(H(H)(H(N)))))	sp|P01876|IGHA1_HUMAN/sp|P0DOX2|IGA2_HUMAN/sp|P01877|IGHA2_HUMAN	144/246/131
SLTFJETYQDISELVYGAK	5 4 2 0 1	(N(F)(N(H(H(N(H(A))))(H(N(H(A)))))))	sp|P01008|ANT3_HUMAN	187
LSLHRPALEDLLLGSEAJLTCTLTGLR	5 5 1 0 1	(N(F)(N(H(N)(H(N(H)))(H(N(H(A)))))))	sp|P01876|IGHA1_HUMAN/sp|P0DOX2|IGA2_HUMAN/sp|P01877|IGHA2_HUMAN	144/246/131
PALEDLLLGSEAJLTCTLTGLR	5 2 0 0 0	(N(N(H(H(H)(H(H))))))	sp|P01876|IGHA1_HUMAN/sp|P0DOX2|IGA2_HUMAN/sp|P01877|IGHA2_HUMAN	144/246/131
SLGNVJFTVSAEALESQELCGTEVPSVPEHGR	5 3 0 0 0	(N(N(H(H(H))(H(N(H))))))	sp|P01023|A2MG_HUMAN	869
LSLHRPALEDLLLGSEAJLTCTLTGLR	5 4 2 0 1	(N(F)(N(H(H(N(H(A))))(H(N(H(A)))))))	sp|P01876|IGHA1_HUMAN/sp|P0DOX2|IGA2_HUMAN/sp|P01877|IGHA2_HUMAN	144/246/131
VSJQTLSLFFTVLQDVPVR	5 4 0 0 1	(N(F)(N(H(H(N(H)))(H(N(H))))))	sp|P01023|A2MG_HUMAN	1424
LSLHRPALEDLLLGSEAJLTCTLTGLR	4 5 0 0 0	(N(N(H(N)(H(N(H))(N(H))))))	sp|P01876|IGHA1_HUMAN/sp|P0DOX2|IGA2_HUMAN/sp|P01877|IGHA2_HUMAN	144/246/131
PALEDLLLGSEAJLTCTLTGLR	5 5 2 0 0	(N(N(H(N)(H(N(H(A))))(H(N(H(A)))))))	sp|P01876|IGHA1_HUMAN/sp|P0DOX2|IGA2_HUMAN/sp|P01877|IGHA2_HUMAN	144/246/131
QJQCFYJSSYLNVQR	7 6 2 0 1	(N(N(H(H(N(H))(N(H(A))))(H(N(H)(F))(N(H(A)))))))	sp|P19652|A1AG2_HUMAN	88
HGIQYFNJNTQHSSLFMLNEVKR	6 5 3 0 1	(N(N(H(H(N(F)(H(A))))(H(N(H(A)))(N(H(A)))))))	sp|P01042|KNG1_HUMAN	169
STGKPTLYJVSLVMSDTAGTCY	7 2 0 0 0	(N(N(H(H(H))(H(H)(H)(H)))))	sp|P0DOX6|IGM_HUMAN/sp|P01871|IGHM_HUMAN	563/440
LSDLSIJSTECLHVHCR	6 5 3 0 0	(N(N(H(H(N(H(A))))(H(N(H(A)))(N(H(A)))))))	sp|P05156|CFAI_HUMAN	177
VVLHPJYSQVDIGLIK	6 5 2 0 1	(N(N(H(H(N(F)(H(A))))(H(N(H))(N(H(A)))))))	sp|P00738|HPT_HUMAN	241
YLGJATAIFFLPDEGK	6 4 1 0 1	(N(N(H(H(N(H(H))))(H(N(F)(H(A)))))))	sp|P01009|A1AT_HUMAN	271
YLGJATAIFFLPDEGK	5 4 1 0 0	(N(N(H(H)(H(N(H))(N(H(A)))))))	sp|P01009|A1AT_HUMAN	271
HGIQYFNJNTQHSSLFMLNEVKR	6 5 3 0 0	(N(N(H(H(N(H(A))))(H(N(H(A)))(N(H(A)))))))	sp|P01042|KNG1_HUMAN	169
FSLLGHASISCTVEJETIGVWRPSPPTCEK	5 4 2 0 1	(N(F)(N(H(H(N(H(A))))(H(N(H(A)))))))	sp|P04003|C4BPA_HUMAN	221
FSDGLESJSSTQFEVK	9 2 0 0 0	(N(N(H(H)(H(H(H))(H(H(H(H))))))))	sp|P0C0L4|CO4A_HUMAN/sp|P0C0L5|CO4B_HUMAN	226/226
EEQFJSTFR	4 4 1 0 0	(N(N(H(H(N))(H(N(H(A)))))))	sp|P01859|IGHG2_HUMAN	176
VDKDLQSLEDILHQVEJK	6 5 1 0 0	(N(N(H(H(N(H(A))))(H(N(H))(N(H))))))	sp|P02679|FIBG_HUMAN	78
VSJQTLSLFFTVLQDVPVR	6 5 2 0 1	(N(F)(N(H(H(N(H(A))))(H(N(H(N(H(A)))))))))	sp|P01023|A2MG_HUMAN	1424
IDSTGJVTNELR	6 2 0 0 0	(N(N(H(H)(H(H)(H)(H)))))	sp|O75882|ATRN_HUMAN	416
LCDJLSTK	5 4 2 0 0	(N(N(H(H(N(H(A))))(H(N(H(A)))))))	sp|P02774|VTDB_HUMAN	288
YLGJATAIFFLPDEGK	5 4 1 0 1	(N(N(H(H(N(H)(F)))(H(N(H(A)))))))	sp|P01009|A1AT_HUMAN	271
ALPQPQJVTSLLGCTH	4 4 1 0 0	(N(N(H(H(N))(H(N(H(A)))))))	sp|P02790|HEMO_HUMAN	453
LSLLEEPGJGTFTVILNQLTSR	4 5 1 0 1	(N(F)(N(H(H(N)(N))(H(N(H(A)))))))	sp|P01833|PIGR_HUMAN	421
HGVIISSTVDTYEJGSSVEYR	5 4 2 0 0	(N(N(H(H(N(H(A))))(H(N(H(A)))))))	sp|P05160|F13B_HUMAN	545
CSDGWSFDATTLDDJGTMLFFK	6 5 3 0 1	(N(N(H(H(N(F)(H(A))))(H(N(H(A)))(N(H(A)))))))	sp|P02790|HEMO_HUMAN	64
LQAILGVPWKDKJCTSR	5 4 2 0 0	(N(N(H(H(N(H(A))))(H(N(H(A)))))))	sp|P01019|ANGT_HUMAN	170
QVETIRNLVDSYMSIIJK	3 3 0 0 0	(N(N(H(H)(H(N)))))	sp|Q9UQ16|DYN3_HUMAN	674
LSDLSIJSTECLHVHCR	5 4 2 0 1	(N(N(H(H(N(H(A))))(H(N(F)(H(A)))))))	sp|P05156|CFAI_HUMAN	177
RJHSCEPCQTLAVR	5 4 2 0 0	(N(N(H(H(N(H(A))))(H(N(H(A)))))))	sp|P00748|FA12_HUMAN	433
VGQLQLSHJLSLVILVPQNLK	6 5 3 0 0	(N(N(H(H(N(H(A))))(H(N(H(A)))(N(H(A)))))))	sp|P05155|IC1_HUMAN	352
FSDGLESJSSTQFEVK	9 2 0 0 0	(N(N(H(H(H(H)))(H(H)(H(H(H)))))))	sp|P0C0L4|CO4A_HUMAN/sp|P0C0L5|CO4B_HUMAN	226/226
VVLHPJYSQVDIGLIK	6 5 1 0 1	(N(N(H(H(N(H)(F)))(H(N(H(N(H(A)))))))))	sp|P00738|HPT_HUMAN	241
LNAENJATFYFK	6 5 3 0 1	(N(F)(N(H(H(N(H(A))))(H(N(H(A)))(N(H(A)))))))	sp|P01042|KNG1_HUMAN	294
DLQSLEDILHQVEJK	5 4 2 0 0	(N(N(H(H(N(H(A))))(H(N(H(A)))))))	sp|P02679|FIBG_HUMAN	78
QQQHLFGSJVTDCSGJFCLFR	6 5 3 0 0	(N(N(H(N(H(A)))(H(N(H(A))))(H(N(H(A)))))))	sp|P02787|TRFE_HUMAN	630
VDKDLQSLEDILHQVEJK	4 5 0 0 2	(N(N(H(H(N(F)))(H(N(H))(N(F))))))	sp|P02679|FIBG_HUMAN	78
FSDGLESJSSTQFEVK	9 2 0 0 0	(N(N(H(H(H))(H(H)(H(H(H(H))))))))	sp|P0C0L4|CO4A_HUMAN/sp|P0C0L5|CO4B_HUMAN	226/226
FSDGLESJSSTQFEVK	9 2 0 0 0	(N(N(H(H(H(H)))(H(H(H(H(H))))))))	sp|P0C0L4|CO4A_HUMAN/sp|P0C0L5|CO4B_HUMAN	226/226
LGACJDTLQQLMEVFKFDTISEK	5 4 2 0 0	(N(N(H(H(N(H(A))))(H(N(H(A)))))))	sp|P01008|ANT3_HUMAN	128
GGSSGWSGGLAQJR	5 4 2 0 0	(N(N(H(H(N(H(A))))(H(N(H(A)))))))	sp|P07357|CO8A_HUMAN	437
TQEAYEMAVRGLIRPMJK	4 3 0 0 0	(N(N(H(H(H))(H(N)))))	sp|O95900|TRUB2_HUMAN	202
VVLHPJYSQVDIGLIK	6 5 1 0 1	(N(N(H(H(N(H)(F)))(H(N(H))(N(H(A)))))))	sp|P00738|HPT_HUMAN	241
NAHGEEKEJLTAR	6 5 3 0 0	(N(N(H(H(N(H(A))))(H(N(H(A)))(N(H(A)))))))	sp|Q06033|ITIH3_HUMAN	580
YKJNSDISSTR	6 5 1 0 1	(N(F)(N(H(N)(H(N(H(H))))(H(N(H(A)))))))	sp|P01871|IGHM_HUMAN	46
FGCEIENJR	5 4 2 0 0	(N(N(H(H(N(H(A))))(H(N(H(A)))))))	sp|P25311|ZA2G_HUMAN	128
NEEYJK	6 5 3 0 2	(N(N(H(H(N(F)(H(A))))(H(N(H(A)))(N(F)(H(A)))))))	sp|P02763|A1AG1_HUMAN/sp|P19652|A1AG2_HUMAN	56/56
VDKDLQSLEDILHQVEJK	4 4 1 0 1	(N(F)(N(H(H(N))(H(N(H(A)))))))	sp|P02679|FIBG_HUMAN	78
EEQYJSTYR	4 4 1 0 1	(N(F)(N(H(H(N))(H(N(H(A)))))))	sp|P0DOX5|IGG1_HUMAN/sp|P01857|IGHG1_HUMAN	299/180
HJSTGCLR	6 5 1 0 1	(N(F)(N(H(H(N(H)))(H(N(H))(N(H(A)))))))	sp|P10909|CLUS_HUMAN	291
EJGTISR	6 5 3 0 1	(N(N(H(H(N(H(A))))(H(N(H(A)))(N(F)(H(A)))))))	sp|P02763|A1AG1_HUMAN	103
QVLFLDTVYGJCSTHFTVK	6 2 0 0 0	(N(N(H(H(H))(H(H(H))))))	sp|P04114|APOB_HUMAN	185
GCVLLSYLJETVTVSASLESVR	5 5 1 0 1	(N(N(H(H(N(H(A))))(H(N(H))(N(F))))))	sp|P01023|A2MG_HUMAN	55
PALEDLLLGSEAJLTCTLTGLR	5 2 0 0 0	(N(N(H(H)(H(H(H))))))	sp|P01876|IGHA1_HUMAN/sp|P0DOX2|IGA2_HUMAN/sp|P01877|IGHA2_HUMAN	144/246/131
DQCIVDDITYNVJDTFHK	5 4 1 0 0	(N(N(H(H(N(H)))(H(N(H(A)))))))	sp|P02751|FINC_HUMAN	528
LSLHRPALEDLLLGSEAJLTCTLTGLR	5 5 2 0 1	(N(F)(N(H(H(N(H(A))))(H(N)(N(H(A)))))))	sp|P01876|IGHA1_HUMAN/sp|P0DOX2|IGA2_HUMAN/sp|P01877|IGHA2_HUMAN	144/246/131
TLJQSSDELQLSMGNAMFVK	5 4 1 0 0	(N(N(H(H(N(H)))(H(N(H(A)))))))	sp|P01011|AACT_HUMAN	127
SLGNVJFTVSAEALESQELCGTEVPSVPEHGR	6 2 0 0 0	(N(N(H(H(H))(H(H(H))))))	sp|P01023|A2MG_HUMAN	869
SHEIWTHSCPQSPGJGTDASH	5 4 2 0 0	(N(N(H(H(N(H(A))))(H(N(H(A)))))))	sp|P04278|SHBG_HUMAN	396
YKJNSDISSTR	4 3 0 0 1	(N(F)(N(H(H)(H(N(H))))))	sp|P01871|IGHM_HUMAN	46
AVLQLNEEGVDTAGSTGVTLJLTSKPIILR	5 4 2 0 0	(N(N(H(H(N(H(A))))(H(N(H(A)))))))	sp|P08185|CBG_HUMAN	369
VTQJLTLIEESLTSEFIHDIDR	5 4 2 0 1	(N(N(H(H(N(H(A))))(H(N(F)(H(A)))))))	sp|P36955|PEDF_HUMAN	285
GLTFQQJASSMCVPDQDTAIR	4 5 1 0 1	(N(F)(N(H(N)(H(N(H))(N(H(A)))))))	sp|P0DOX6|IGM_HUMAN/sp|P01871|IGHM_HUMAN	332/209
PALEDLLLGSEAJLTCTLTGLR	6 4 1 0 0	(N(N(H(H(H))(H(N(H))(N(H(A)))))))	sp|P01876|IGHA1_HUMAN/sp|P0DOX2|IGA2_HUMAN/sp|P01877|IGHA2_HUMAN	144/246/131
FSDGLESJSSTQFEVK	10 2 0 0 0	(N(N(H(H(H)(H))(H(H(H(H(H(H)))))))))	sp|P0C0L4|CO4A_HUMAN/sp|P0C0L5|CO4B_HUMAN	226/226
SLGNVJFTVSAEALESQELCGTEVPSVPEHGR	6 3 0 0 0	(N(N(H(H(H(H)))(H(N(H))))))	sp|P01023|A2MG_HUMAN	869
STGKPTLYJVSLVMSDTAGTCY	7 2 0 0 0	(N(N(H(H(H)(H(H(H(H))))))))	sp|P0DOX6|IGM_HUMAN/sp|P01871|IGHM_HUMAN	563/440
FSDGLESJSSTQFEVK	8 2 0 0 0	(N(N(H(H)(H(H(H))(H(H(H)))))))	sp|P0C0L4|CO4A_HUMAN/sp|P0C0L5|CO4B_HUMAN	226/226
YLGJATAIFFLPDEGK	5 4 1 0 1	(N(N(H(H(N(H)))(H(N(F)(H(A)))))))	sp|P01009|A1AT_HUMAN	271
GLTFQQJASSMCVPDQDTAIR	5 5 1 0 1	(N(N(H(H(N(H(A))))(H(N)(N(H)(F))))))	sp|P0DOX6|IGM_HUMAN/sp|P01871|IGHM_HUMAN	332/209
LSLHRPALEDLLLGSEAJLTCTLTGLR	6 4 1 0 0	(N(N(H(H(N(H(H))))(H(N(H(A)))))))	sp|P01876|IGHA1_HUMAN/sp|P0DOX2|IGA2_HUMAN/sp|P01877|IGHA2_HUMAN	144/246/131
SVQEIQATFFYFTPJKTEDTIFLR	7 6 1 0 3	(N(N(H(H(N(H)(F))(N(H)(F)))(H(N(H)(F))(N(H(A)))))))	sp|P02763|A1AG1_HUMAN/sp|P19652|A1AG2_HUMAN	72/72
GLTFQQJASSMCVPDQDTAIR	6 5 1 0 1	(N(F)(N(H(H(N(H(A))))(H(N(H))(N(H))))))	sp|P0DOX6|IGM_HUMAN/sp|P01871|IGHM_HUMAN	332/209
LSLHRPALEDLLLGSEAJLTCTLTGLR	5 5 2 0 1	(N(N(H(H(N(F)))(H(N(H(A)))(N(H(A)))))))	sp|P01876|IGHA1_HUMAN/sp|P0DOX2|IGA2_HUMAN/sp|P01877|IGHA2_HUMAN	144/246/131
EHEGAIYPDJTTDFQR	5 4 2 0 1	(N(F)(N(H(H(N(H(A))))(H(N(H(A)))))))	sp|P00450|CERU_HUMAN	138
STGKPTLYJVSLVMSDTAGTCY	8 2 0 0 0	(N(N(H(H(H)(H))(H(H(H(H)))))))	sp|P0DOX6|IGM_HUMAN/sp|P01871|IGHM_HUMAN	563/440
TPLTAJITK	6 5 1 0 1	(N(F)(N(H(H(N(H(A))))(H(N(H))(N(H))))))	sp|P0DOX2|IGA2_HUMAN/sp|P01877|IGHA2_HUMAN	320/205
EHEGAIYPDJTTDFQR	6 5 3 0 2	(N(F)(N(H(H(N(F)(H(A))))(H(N(H(A)))(N(H(A)))))))	sp|P00450|CERU_HUMAN	138
ADGTVNQIEGEATPVJLTEPAK	6 5 2 0 1	(N(F)(N(H(H(N(H(A))))(H(N(H(N(H(A)))))))))	sp|P05090|APOD_HUMAN	98
TVLTPATNHMGJVTFTIPANR	6 2 0 0 0	(N(N(H(H)(H(H)(H)(H)))))	sp|P01024|CO3_HUMAN	85
PTHVJVSVVMAEVDGTCY	5 5 2 0 1	(N(F)(N(H(N)(H(N(H(A))))(H(N(H(A)))))))	sp|P01876|IGHA1_HUMAN	340
LSLLEEPGJGTFTVILNQLTSR	5 4 2 0 0	(N(N(H(H(N(H(A))))(H(N(H(A)))))))	sp|P01833|PIGR_HUMAN	421
VIDFJCTTSSVSSALANTK	6 3 1 0 0	(N(N(H(H)(H(H)(H(N(H(A))))))))	sp|P04196|HRG_HUMAN	125
PALEDLLLGSEAJLTCTLTGLR	5 5 0 0 0	(N(N(H(N)(H(N(H)))(H(N(H))))))	sp|P01876|IGHA1_HUMAN/sp|P0DOX2|IGA2_HUMAN/sp|P01877|IGHA2_HUMAN	144/246/131
TPLTAJITK	5 5 0 0 2	(N(F)(N(H(N)(H(N(H)))(H(N(H(F)))))))	sp|P0DOX2|IGA2_HUMAN/sp|P01877|IGHA2_HUMAN	320/205
LSLHRPALEDLLLGSEAJLTCTLTGLR	6 4 1 0 0	(N(N(H(H(H))(H(N(H))(N(H(A)))))))	sp|P01876|IGHA1_HUMAN/sp|P0DOX2|IGA2_HUMAN/sp|P01877|IGHA2_HUMAN	144/246/131
ALPQPQJVTSLLGCTH	5 4 1 0 1	(N(N(H(H(N(H)(F)))(H(N(H(A)))))))	sp|P02790|HEMO_HUMAN	453
SLGNVJFTVSAEALESQELCGTEVPSVPEHGR	6 3 0 0 0	(N(N(H(H(H)(H))(H(H(N))))))	sp|P01023|A2MG_HUMAN	869
JISDGFDGIPDNVDAALALPAHSYSGR	6 5 2 0 1	(N(F)(N(H(H(N(H(A))))(H(N(H(N(H(A)))))))))	sp|P04004|VTNC_HUMAN	242
JYTLTGR	5 5 1 0 1	(N(F)(N(H(N)(H(N(H)))(H(N(H(A)))))))	sp|P10643|CO7_HUMAN	754
DLQSLEDILHQVEJK	4 4 1 0 0	(N(N(H(H(N))(H(N(H(A)))))))	sp|P02679|FIBG_HUMAN	78
STGKPTLYJVSLVMSDTAGTCY	6 2 0 0 0	(N(N(H(H(H(H(H(H))))))))	sp|P0DOX6|IGM_HUMAN/sp|P01871|IGHM_HUMAN	563/440
SVQEIQATFFYFTPJKTEDTIFLR	6 5 2 0 3	(N(N(H(H(N(F)(H(A))))(H(N(H)(F))(N(F)(H(A)))))))	sp|P02763|A1AG1_HUMAN/sp|P19652|A1AG2_HUMAN	72/72
MLJTSSLLEQLNEQFNWVSR	5 4 1 0 1	(N(F)(N(H(H(N(H)))(H(N(H(A)))))))	sp|P10909|CLUS_HUMAN	354
LQAPLJYTEFQKPICLPSK	5 4 1 0 0	(N(N(H(H(N(H)))(H(N(H(A)))))))	sp|P03952|KLKB1_HUMAN	494
FJSSYLQGTNQITGR	6 3 1 0 0	(N(N(H(H)(H(H)(H(N(H(A))))))))	sp|P04114|APOB_HUMAN	1523
NJATVHEQVGGPSLTSDLQAQSK	5 4 2 0 1	(N(F)(N(H(H(N(H(A))))(H(N(H(A)))))))	sp|P04004|VTNC_HUMAN	86
IDSTGJVTNELR	5 2 0 0 0	(N(N(H(H)(H(H)(H)))))	sp|O75882|ATRN_HUMAN	416
FSDGLESJSSTQFEVK	10 2 0 0 0	(N(N(H(H(H))(H(H)(H(H(H(H(H)))))))))	sp|P0C0L4|CO4A_HUMAN/sp|P0C0L5|CO4B_HUMAN	226/226
VDKDLQSLEDILHQVEJK	4 4 1 0 0	(N(N(H(H(N(H))(N(H(A)))))))	sp|P02679|FIBG_HUMAN	78
AGLQAFFQVQECJK	5 4 2 0 1	(N(F)(N(H(H(N(H(A))))(H(N(H(A)))))))	sp|P00450|CERU_HUMAN	358
PALEDLLLGSEAJLTCTLTGLR	5 4 1 0 1	(N(F)(N(H(H(N(H)))(H(N(H(A)))))))	sp|P01876|IGHA1_HUMAN/sp|P0DOX2|IGA2_HUMAN/sp|P01877|IGHA2_HUMAN	144/246/131
GTAGNALMDGASQLMGEJR	5 4 2 0 1	(N(N(H(H(N(H(A))))(H(N(F)(H(A)))))))	sp|P02675|FIBB_HUMAN	394
VDKDLQSLEDILHQVEJK	5 4 0 0 2	(N(N(H(H(N(H(F))))(H(N(H(F)))))))	sp|P02679|FIBG_HUMAN	78
QLAHQSJSTNIFFSPVSIATAFAMLSLGTK	5 4 2 0 1	(N(N(H(H(N(H(A))))(H(N(F)(H(A)))))))	sp|P01009|A1AT_HUMAN	70
PALEDLLLGSEAJLTCTLTGLR	4 3 1 0 0	(N(N(H(H)(H(N(H(A)))))))	sp|P01876|IGHA1_HUMAN/sp|P0DOX2|IGA2_HUMAN/sp|P01877|IGHA2_HUMAN	144/246/131
GLJVTLSSTGR	4 3 0 0 0	(N(N(H(H(H))(H(N)))))	sp|P0C0L4|CO4A_HUMAN/sp|P0C0L5|CO4B_HUMAN	1328/1328
MLJTSSLLEQLNEQFNWVSR	6 5 3 0 1	(N(N(H(H(N(F)(H(A))))(H(N(H(A)))(N(H(A)))))))	sp|P10909|CLUS_HUMAN	354
AALAAFNAQNJGSNFQLEEISR	6 5 2 0 1	(N(F)(N(H(H(N(H(A))))(H(N(H(N(H(A)))))))))	sp|P02765|FETUA_HUMAN	176
FSDGLESJSSTQFEVK	10 2 0 0 0	(N(N(H(H(H)(H(H)))(H(H)(H(H(H)))))))	sp|P0C0L4|CO4A_HUMAN/sp|P0C0L5|CO4B_HUMAN	226/226
FJLTETSEAEIHQSFQHLLR	7 6 3 0 1	(N(N(H(H(N(H))(N(F)(H(A))))(H(N(H(A)))(N(H(A)))))))	sp|P01011|AACT_HUMAN	106
PALEDLLLGSEAJLTCTLTGLR	5 4 2 0 1	(N(F)(N(H(H(N(H(A))))(H(N(H(A)))))))	sp|P01876|IGHA1_HUMAN/sp|P0DOX2|IGA2_HUMAN/sp|P01877|IGHA2_HUMAN	144/246/131
QEPERJECFLQHKDDNPNLPR	5 4 2 0 0	(N(N(H(H(N(H(A))))(H(N(H(A)))))))	sp|P02768|ALBU_HUMAN	123
GLTFQQJASSMCVPDQDTAIR	5 4 2 0 1	(N(N(H(H(N(H(A))))(H(N(F)(H(A)))))))	sp|P0DOX6|IGM_HUMAN/sp|P01871|IGHM_HUMAN	332/209
VVLHPJYSQVDIGLIK	5 4 1 0 1	(N(N(H(H(N(H)(F)))(H(N(H(A)))))))	sp|P00738|HPT_HUMAN	241
DIVEYYJDSJGSHVLQGR	6 5 3 0 1	(N(F)(N(H(H(N(H(A))))(H(N(H(A)))(N(H(A)))))))	sp|P25311|ZA2G_HUMAN	109
QVLFLDTVYGJCSTHFTVK	7 2 0 0 0	(N(N(H(H(H)(H))(H(H)(H)))))	sp|P04114|APOB_HUMAN	185
VDKDLQSLEDILHQVEJK	4 3 0 0 0	(N(N(H(H(H))(H(N)))))	sp|P02679|FIBG_HUMAN	78
FSDGLESJSSTQFEVK	10 2 0 0 0	(N(N(H(H)(H(H(H(H)))(H(H(H(H))))))))	sp|P0C0L4|CO4A_HUMAN/sp|P0C0L5|CO4B_HUMAN	226/226
VSJQTLSLFFTVLQDVPVR	5 5 1 0 1	(N(F)(N(H(H(N)(N(H)))(H(N(H(A)))))))	sp|P01023|A2MG_HUMAN	1424
TPLTAJITK	5 4 1 0 0	(N(N(H(H(N(H)))(H(N(H(A)))))))	sp|P0DOX2|IGA2_HUMAN/sp|P01877|IGHA2_HUMAN	320/205
PALEDLLLGSEAJLTCTLTGLR	6 3 1 0 0	(N(N(H(H(H(H)))(H(N(H(A)))))))	sp|P01876|IGHA1_HUMAN/sp|P0DOX2|IGA2_HUMAN/sp|P01877|IGHA2_HUMAN	144/246/131
GLTFQQJASSMCVPDQDTAIR	5 5 1 0 0	(N(N(H(N)(H(N(H)))(H(N(H(A)))))))	sp|P0DOX6|IGM_HUMAN/sp|P01871|IGHM_HUMAN	332/209
QVLFLDTVYGJCSTHFTVK	7 2 0 0 0	(N(N(H(H(H)(H))(H(H(H))))))	sp|P04114|APOB_HUMAN	185
VDKDLQSLEDILHQVEJK	3 3 0 0 0	(N(N(H(N)(H(H)))))	sp|P02679|FIBG_HUMAN	78
JGSLFAFR	6 3 1 0 0	(N(N(H(H(H(H)))(H(N(H(A)))))))	sp|P04004|VTNC_HUMAN	169
VDKDLQSLEDILHQVEJK	5 4 0 0 0	(N(N(H(H(N))(H(N(H(H)))))))	sp|P02679|FIBG_HUMAN	78
DFYVDEJTTVR	5 4 2 0 0	(N(N(H(H(N(H(A))))(H(N(H(A)))))))	sp|P29622|KAIN_HUMAN	238
KYNSQJQSNNQFVLYR	5 4 2 0 0	(N(N(H(H(N(H(A))))(H(N(H(A)))))))	sp|P01042|KNG1_HUMAN	48
VDKDLQSLEDILHQVEJK	5 4 1 0 1	(N(N(H(H(N(H)(F)))(H(N(H(A)))))))	sp|P02679|FIBG_HUMAN	78
ADGTVNQIEGEATPVJLTEPAKLEVK	4 3 0 0 1	(N(F)(N(H(H)(H(N(H))))))	sp|P05090|APOD_HUMAN	98
FSDGLESJSSTQFEVK	8 2 0 0 0	(N(N(H(H(H))(H(H)(H)(H(H))))))	sp|P0C0L4|CO4A_HUMAN/sp|P0C0L5|CO4B_HUMAN	226/226
GTAGNALMDGASQLMGEJR	5 4 1 0 0	(N(N(H(N)(H(H))(H(N(H(A)))))))	sp|P02675|FIBB_HUMAN	394
SWPAVGJCSSALR	6 5 3 0 1	(N(F)(N(H(H(N(H(A))))(H(N(H(A)))(N(H(A)))))))	sp|P02790|HEMO_HUMAN	187
IYSJHSALESLALIPLQAPLK	5 4 1 0 1	(N(F)(N(H(H(N(H)))(H(N(H(A)))))))	sp|P55058|PLTP_HUMAN	398
CMWSSALNSLJLSFAGLEQVPK	9 2 0 0 0	(N(N(H(H)(H(H(H(H)))(H(H(H)))))))	sp|P08571|CD14_HUMAN	282
VDKDLQSLEDILHQVEJK	5 4 1 0 0	(N(N(H(H(H))(H(N)(N(H(A)))))))	sp|P02679|FIBG_HUMAN	78
LATALSLSNKFVEGSHJSTVSLTTK	5 3 1 0 0	(N(N(H(H(H))(H(N(H(A)))))))	sp|P04114|APOB_HUMAN	3411
GTAGNALMDGASQLMGEJR	3 3 0 0 0	(N(N(H(H)(H(N)))))	sp|P02675|FIBB_HUMAN	394
VDKDLQSLEDILHQVEJK	6 4 1 0 0	(N(N(H(H(N(H(H))))(H(N(H(A)))))))	sp|P02679|FIBG_HUMAN	78
TPLTAJITK	4 5 0 0 1	(N(F)(N(H(N)(H(N))(H(N(H))))))	sp|P0DOX2|IGA2_HUMAN/sp|P01877|IGHA2_HUMAN	320/205
YKJNSDISSTR	4 5 1 0 1	(N(F)(N(H(N)(H(N))(H(N(H(A)))))))	sp|P01871|IGHM_HUMAN	46
YKJNSDISSTR	4 3 0 0 1	(N(F)(N(H(H(H))(H(N)))))	sp|P01871|IGHM_HUMAN	46
FSDGLESJSSTQFEVK	8 2 0 0 0	(N(N(H(H(H))(H(H(H(H(H))))))))	sp|P0C0L4|CO4A_HUMAN/sp|P0C0L5|CO4B_HUMAN	226/226
EJETEIIK	5 4 2 0 0	(N(N(H(H(N(H(A))))(H(N(H(A)))))))	sp|P06276|CHLE_HUMAN	284
GLTFQQJASSMCVPDQDTAIR	4 5 1 0 1	(N(F)(N(H(H(N)(N))(H(N(H(A)))))))	sp|P0DOX6|IGM_HUMAN/sp|P01871|IGHM_HUMAN	332/209
HYTJSSQDVTVPCR	5 5 1 0 1	(N(N(H(N)(H(N(H)(F)))(H(N(H(A)))))))	sp|P0DOX2|IGA2_HUMAN/sp|P01877|IGHA2_HUMAN	207/92
EJGTVSR	5 4 2 0 0	(N(N(H(H(N(H(A))))(H(N(H(A)))))))	sp|P19652|A1AG2_HUMAN	103
TPLTAJITK	5 5 1 0 0	(N(N(H(N)(H(N(H)))(H(N(H(A)))))))	sp|P0DOX2|IGA2_HUMAN/sp|P01877|IGHA2_HUMAN	320/205
FSDGLESJSSTQFEVK	9 2 0 0 0	(N(N(H(H(H)(H(H(H(H(H(H))))))))))	sp|P0C0L4|CO4A_HUMAN/sp|P0C0L5|CO4B_HUMAN	226/226
VDKDLQSLEDILHQVEJK	5 4 0 0 0	(N(N(H(H(H))(H(N)(N(H))))))	sp|P02679|FIBG_HUMAN	78
ELHHLQEQJVSNAFLDK	6 5 3 0 1	(N(N(H(H(N(F)(H(A))))(H(N(H(A)))(N(H(A)))))))	sp|P00450|CERU_HUMAN	762
SWPAVGJCSSALR	6 5 3 0 1	(N(N(H(H(N(F)(H(A))))(H(N(H(A)))(N(H(A)))))))	sp|P02790|HEMO_HUMAN	187
LSLHRPALEDLLLGSEAJLTCTLTGLR	6 4 1 0 0	(N(N(H(H(H)(H))(H(N)(N(H(A)))))))	sp|P01876|IGHA1_HUMAN/sp|P0DOX2|IGA2_HUMAN/sp|P01877|IGHA2_HUMAN	144/246/131
GTAGNALMDGASQLMGEJR	5 4 1 0 0	(N(N(H(H(H))(H(N)(N(H(A)))))))	sp|P02675|FIBB_HUMAN	394
FJSSYLQGTNQITGR	4 4 1 0 0	(N(N(H(H(N))(H(N(H(A)))))))	sp|P04114|APOB_HUMAN	1523
VVLHPJYSQVDIGLIK	5 4 1 0 0	(N(N(H(H(H))(H(N)(N(H(A)))))))	sp|P00738|HPT_HUMAN	241
VVLHPJYSQVDIGLIK	5 4 1 0 0	(N(N(H(H)(H(N(H))(N(H(A)))))))	sp|P00738|HPT_HUMAN	241
QVLFLDTVYGJCSTHFTVK	7 2 0 0 0	(N(N(H(H(H(H)))(H(H(H))))))	sp|P04114|APOB_HUMAN	185
QQQHLFGSJVTDCSGJFCLFR	5 4 1 0 1	(N(N(H(H(N(H)(F)))(H(N(H(A)))))))	sp|P02787|TRFE_HUMAN	630
FLNJGTCTAEGK	5 4 2 0 0	(N(N(H(H(N(H(A))))(H(N(H(A)))))))	sp|P05156|CFAI_HUMAN	103
GTAGNALMDGASQLMGEJR	6 4 1 0 0	(N(N(H(H(N(H(H))))(H(N(H(A)))))))	sp|P02675|FIBB_HUMAN	394
JGTAVCATNR	5 4 2 0 0	(N(N(H(H(N(H(A))))(H(N(H(A)))))))	sp|P05156|CFAI_HUMAN	70
LAJLTQGEDQYYLR	6 5 3 0 1	(N(F)(N(H(H(N(H(A))))(H(N(H(A)))(N(H(A)))))))	sp|P10909|CLUS_HUMAN	374
LAGKPTHVJVSVVMAEVDGTCY	5 4 2 0 1	(N(N(H(H(N(H(A))))(H(N(F)(H(A)))))))	sp|P01876|IGHA1_HUMAN	340
YKJNSDISSTR	6 5 1 0 1	(N(F)(N(H(H(N(H)))(H(N(H))(N(H(A)))))))	sp|P01871|IGHM_HUMAN	46
IDSTGJVTNELR	5 2 0 0 0	(N(N(H(H(H(H(H)))))))	sp|O75882|ATRN_HUMAN	416
TPLTAJITK	4 5 1 0 1	(N(F)(N(H(N)(H(N))(H(N(H(A)))))))	sp|P0DOX2|IGA2_HUMAN/sp|P01877|IGHA2_HUMAN	320/205
VDKDLQSLEDILHQVEJK	4 4 1 0 1	(N(N(H(H(N(F)))(H(N(H(A)))))))	sp|P02679|FIBG_HUMAN	78
LSLHRPALEDLLLGSEAJLTCTLTGLR	4 5 1 0 0	(N(N(H(N)(H(N))(H(N(H(A)))))))	sp|P01876|IGHA1_HUMAN/sp|P0DOX2|IGA2_HUMAN/sp|P01877|IGHA2_HUMAN	144/246/131
TVLTPATNHMGJVTFTIPANR	6 2 0 0 0	(N(N(H(H(H))(H(H(H))))))	sp|P01024|CO3_HUMAN	85
PVTPIAQJQTTLGSSR	5 4 2 0 0	(N(N(H(H(N(H(A))))(H(N(H(A)))))))	sp|Q9NZP8|C1RL_HUMAN	242
FSDGLESJSSTQFEVK	7 2 0 0 0	(N(N(H(H(H)(H))(H(H)(H)))))	sp|P0C0L4|CO4A_HUMAN/sp|P0C0L5|CO4B_HUMAN	226/226
LSLHRPALEDLLLGSEAJLTCTLTGLR	5 4 1 0 1	(N(F)(N(H(H(N(H)))(H(N(H(A)))))))	sp|P01876|IGHA1_HUMAN/sp|P0DOX2|IGA2_HUMAN/sp|P01877|IGHA2_HUMAN	144/246/131
HJFSHCCSK	5 4 2 0 0	(N(N(H(H(N(H(A))))(H(N(H(A)))))))	sp|P43652|AFAM_HUMAN	109
TPLTAJITK	4 4 1 0 1	(N(F)(N(H(H(N))(H(N(H(A)))))))	sp|P0DOX2|IGA2_HUMAN/sp|P01877|IGHA2_HUMAN	320/205
ELHHLQEQJVSNAFLDK	5 4 2 0 1	(N(F)(N(H(H(N(H(A))))(H(N(H(A)))))))	sp|P00450|CERU_HUMAN	762
STGKPTLYJVSLVMSDTAGTCY	8 2 0 0 0	(N(N(H(H(H(H)))(H(H)(H(H))))))	sp|P0DOX6|IGM_HUMAN/sp|P01871|IGHM_HUMAN	563/440
VDKDLQSLEDILHQVEJK	4 4 1 0 0	(N(N(H(H)(H(N)(N(H(A)))))))	sp|P02679|FIBG_HUMAN	78
GHVJITR	4 3 0 0 0	(N(N(H(H(H))(H(N)))))	sp|P00734|THRB_HUMAN	121
YKJNSDISSTR	5 4 1 0 0	(N(N(H(H(N(H)))(H(N(H(A)))))))	sp|P01871|IGHM_HUMAN	46
YKJNSDISSTR	5 3 1 0 0	(N(N(H(H(H))(H(N(H(A)))))))	sp|P01871|IGHM_HUMAN	46
ADGTVNQIEGEATPVJLTEPAKLEVK	5 4 1 0 0	(N(N(H(H(N(H)))(H(N(H(A)))))))	sp|P05090|APOD_HUMAN	98
FSDGLESJSSTQFEVK	10 2 0 0 0	(N(N(H(H(H(H)))(H(H(H(H(H(H)))))))))	sp|P0C0L4|CO4A_HUMAN/sp|P0C0L5|CO4B_HUMAN	226/226
FSDGLESJSSTQFEVK	9 2 0 0 0	(N(N(H(H(H(H(H))))(H(H(H(H)))))))	sp|P0C0L4|CO4A_HUMAN/sp|P0C0L5|CO4B_HUMAN	226/226
QDQCIYJTTYLNVQR	6 5 3 0 1	(N(F)(N(H(H(N(H(A))))(H(N(H(A)))(N(H(A)))))))	sp|P02763|A1AG1_HUMAN	93
AJISHK	5 4 2 0 0	(N(N(H(H(N(H(A))))(H(N(H(A)))))))	sp|Q14940|SL9A5_HUMAN/sp|P01031|CO5_HUMAN/sp|P19634|SL9A1_HUMAN	319/741/370
FSDGLESJSSTQFEVK	9 2 0 0 0	(N(N(H(H(H)(H(H)))(H(H(H(H)))))))	sp|P0C0L4|CO4A_HUMAN/sp|P0C0L5|CO4B_HUMAN	226/226
LSLHRPALEDLLLGSEAJLTCTLTGLR	4 5 1 0 1	(N(F)(N(H(H(N)(N))(H(N(H(A)))))))	sp|P01876|IGHA1_HUMAN/sp|P0DOX2|IGA2_HUMAN/sp|P01877|IGHA2_HUMAN	144/246/131
JGTAVCATNR	5 4 1 0 0	(N(N(H(H(N(H)))(H(N(H(A)))))))	sp|P05156|CFAI_HUMAN	70
LISJCSK	5 4 1 0 0	(N(N(H(H(N(H)))(H(N(H(A)))))))	sp|P05156|CFAI_HUMAN	494
FSDGLESJSSTQFEVK	7 2 0 0 0	(N(N(H(H(H)(H(H(H(H))))))))	sp|P0C0L4|CO4A_HUMAN/sp|P0C0L5|CO4B_HUMAN	226/226
QVLFLDTVYGJCSTHFTVK	5 2 0 0 0	(N(N(H(H)(H(H(H))))))	sp|P04114|APOB_HUMAN	185
JVTAEQAR	5 4 1 0 0	(N(N(H(H(N(H)))(H(N(H(A)))))))	sp|P00748|FA12_HUMAN	249
YKJNSDISSTR	4 3 1 0 0	(N(N(H(H)(H(N(H(A)))))))	sp|P01871|IGHM_HUMAN	46
FSDGLESJSSTQFEVK	9 2 0 0 0	(N(N(H(H(H(H))(H(H(H(H(H)))))))))	sp|P0C0L4|CO4A_HUMAN/sp|P0C0L5|CO4B_HUMAN	226/226
EEQFJSTFR	4 5 1 0 1	(N(F)(N(H(N)(H(N))(H(N(H(A)))))))	sp|P01859|IGHG2_HUMAN	176
ADGTVNQIEGEATPVJLTEPAKLEVK	5 4 1 0 1	(N(F)(N(H(H(N(H)))(H(N(H(A)))))))	sp|P05090|APOD_HUMAN	98
VVLHPJYSQVDIGLIK	6 4 2 0 0	(N(N(H(H(N(H(A))))(H(N(H(H)(A)))))))	sp|P00738|HPT_HUMAN	241
EEQFJSTYR	4 4 1 0 1	(N(F)(N(H(H(N))(H(N(H(A)))))))	sp|P01861|IGHG4_HUMAN	177
FSDGLESJSSTQFEVK	9 2 0 0 0	(N(N(H(H(H)(H))(H(H(H(H(H))))))))	sp|P0C0L4|CO4A_HUMAN/sp|P0C0L5|CO4B_HUMAN	226/226
YKJNSDISSTR	6 3 1 0 0	(N(N(H(H)(H(H)(H(N(H(A))))))))	sp|P01871|IGHM_HUMAN	46
VSJQTLSLFFTVLQDVPVR	5 5 0 0 1	(N(F)(N(H(N)(H(N(H)))(H(N(H))))))	sp|P01023|A2MG_HUMAN	1424
EEQFJSTFR	5 4 0 0 1	(N(F)(N(H(H(H))(H(N)(N(H))))))	sp|P01859|IGHG2_HUMAN	176
EEQFJSTFR	5 5 0 0 1	(N(F)(N(H(N)(H(N(H)))(H(N(H))))))	sp|P01859|IGHG2_HUMAN	176
NEEYJK	6 5 3 0 1	(N(N(H(H(N(H(A))))(H(N(H(A)))(N(F)(H(A)))))))	sp|P02763|A1AG1_HUMAN/sp|P19652|A1AG2_HUMAN	56/56
VVLHPJYSQVDIGLIK	5 4 2 0 1	(N(F)(N(H(H(N(H(A))))(H(N(H(A)))))))	sp|P00738|HPT_HUMAN	241
SYJETK	5 4 2 0 1	(N(F)(N(H(H(N(H(A))))(H(N(H(A)))))))	sp|P04114|APOB_HUMAN	3224
DLQSLEDILHQVEJK	5 4 1 0 0	(N(N(H(H(H))(H(N)(N(H(A)))))))	sp|P02679|FIBG_HUMAN	78
TLLJASR	5 5 2 0 0	(N(N(H(N)(H(N(H(A))))(H(N(H(A)))))))	sp|P01880|IGHD_HUMAN/sp|P0DOX3|IGD_HUMAN	367/496
LSLHRPALEDLLLGSEAJLTCTLTGLR	4 5 0 0 0	(N(N(H(N)(H(N))(H(N(H))))))	sp|P01876|IGHA1_HUMAN/sp|P0DOX2|IGA2_HUMAN/sp|P01877|IGHA2_HUMAN	144/246/131
KLHINHNJLTESVGPLPK	5 4 2 0 1	(N(F)(N(H(H(N(H(A))))(H(N(H(A)))))))	sp|P51884|LUM_HUMAN	127
AAIPSALDTJSSK	5 4 2 0 0	(N(N(H(H(N(H(A))))(H(N(H(A)))))))	sp|Q08380|LG3BP_HUMAN	551
EJISDPTSPLR	5 3 1 0 1	(N(F)(N(H(H(H))(H(N(H(A)))))))	sp|P01591|IGJ_HUMAN	71
JNSDISSTR	5 3 1 0 1	(N(F)(N(H(H(H))(H(N(H(A)))))))	sp|P01871|IGHM_HUMAN	46
FSDGLESJSSTQFEVK	9 2 0 0 0	(N(N(H(H(H(H(H(H(H(H(H)))))))))))	sp|P0C0L4|CO4A_HUMAN/sp|P0C0L5|CO4B_HUMAN	226/226
HJSTGCLR	6 5 1 0 0	(N(N(H(H(N(H(A))))(H(N(H))(N(H))))))	sp|P10909|CLUS_HUMAN	291
EEQYJSTYR	5 4 1 0 0	(N(N(H(N)(H(H))(H(N(H(A)))))))	sp|P0DOX5|IGG1_HUMAN/sp|P01857|IGHG1_HUMAN	299/180
VVLHPJYSQVDIGLIK	5 4 1 0 1	(N(N(H(H(N(H)))(H(N(F)(H(A)))))))	sp|P00738|HPT_HUMAN	241
JNSDISSTR	6 3 1 0 0	(N(N(H(H(H(H)))(H(N(H(A)))))))	sp|P01871|IGHM_HUMAN	46
YKJNSDISSTR	5 4 0 0 1	(N(F)(N(H(H(N))(H(N(H(H)))))))	sp|P01871|IGHM_HUMAN	46

## Sheet: Supplementary Table 2
Supplementary Table 2: Size-exclusion chromtography based enrichement of glycopeptides was perfromed and data was searched with semi-tryptic cleavage specificity. Peptide sequence is provided in the column A, where J is the Aspragine on which the glycan was localized. Column B provides the composition of the glycan at the glycosylation site, where H, N, A, G, F are in sequence and H=Hexose, N=Hex…
Peptide sequence	Glycan composition (H,N,A,G,F)	Plausible Structure	Proteins (Uniprot accession and Id)	Glycosyaltion Site
MVSHHJLTTGATLINEQWLLTTAK	5 4 2 0 0	(N(N(H(H(N(H(A))))(H(N(H(A)))))))	sp|P00739|HPTR_HUMAN/sp|P00738|HPT_HUMAN	126/184
VVLHPJYSQVDIGLIK	5 4 1 0 0	(N(N(H(H(N(H)))(H(N(H(A)))))))	sp|P00738|HPT_HUMAN	241
LAGKPTHVJVSVVMAEVDGTC	5 5 2 0 1	(N(F)(N(H(N)(H(N(H(A))))(H(N(H(A)))))))	sp|P01876|IGHA1_HUMAN	340
GTAGNALMDGASQLMGEJR	5 4 1 0 0	(N(N(H(H(N(H)))(H(N(H(A)))))))	sp|P02675|FIBB_HUMAN	394
GTAGNALMDGASQLMGEJR	5 4 2 0 0	(N(N(H(H(N(H(A))))(H(N(H(A)))))))	sp|P02675|FIBB_HUMAN	394
LVPVPITJATLDR	6 5 2 0 0	(N(N(H(H(N(H(A))))(H(N(H))(N(H(A)))))))	sp|P19652|A1AG2_HUMAN	33
VCQDCPLLAPLJDTR	5 4 2 0 1	(N(F)(N(H(H(N(H(A))))(H(N(H(A)))))))	sp|P02765|FETUA_HUMAN	156
VDKDLQSLEDILHQVEJK	6 3 1 0 0	(N(N(H(H)(H(H)(H(N(H(A))))))))	sp|P02679|FIBG_HUMAN	78
LVPVPITJATLDQITGK	6 5 2 0 0	(N(N(H(H(N(H(A))))(H(N(H))(N(H(A)))))))	sp|P02763|A1AG1_HUMAN	33
SVQEIQATFFYFTPJKTEDTIFLR	7 6 4 0 0	(N(N(H(H(N(H(A)))(N(H(A))))(H(N(H(A)))(N(H(A)))))))	sp|P02763|A1AG1_HUMAN/sp|P19652|A1AG2_HUMAN	72/72
GCVLLSYLJETVTVSASLESVR	5 4 2 0 1	(N(F)(N(H(H(N(H(A))))(H(N(H(A)))))))	sp|P01023|A2MG_HUMAN	55
QLHVEHDGESCSJSSHQQILETGEGSPSLK	6 5 3 0 1	(N(N(H(H(N(F)(H(A))))(H(N(H(A)))(N(H(A)))))))	sp|P29622|KAIN_HUMAN	33
MVSHHJLTTGATLINEQWLLTTAK	5 4 1 0 2	(N(N(H(H(N(H)(F)))(H(N(F)(H(A)))))))	sp|P00739|HPTR_HUMAN/sp|P00738|HPT_HUMAN	126/184
CSDGWSFDATTLDDJGTMLFFK	5 4 2 0 1	(N(F)(N(H(H(N(H(A))))(H(N(H(A)))))))	sp|P02790|HEMO_HUMAN	64
ESVTDHVNLITPLEKPLQJFTLCFR	5 4 2 0 0	(N(N(H(H(N(H(A))))(H(N(H(A)))))))	sp|P02743|SAMP_HUMAN	51
TLJQSSDELQLSMGNAMFVK	6 5 3 0 1	(N(N(H(H(N(F)(H(A))))(H(N(H(A)))(N(H(A)))))))	sp|P01011|AACT_HUMAN	127
PALEDLLLGSEAJLTCTLTGLR	4 5 0 0 0	(N(N(H(N)(H(N(H))(N(H))))))	sp|P01876|IGHA1_HUMAN/sp|P0DOX2|IGA2_HUMAN/sp|P01877|IGHA2_HUMAN	144/246/131
MVSHHJLTTGATLINEQWLLTTAK	5 4 1 0 0	(N(N(H(H(N(H)))(H(N(H(A)))))))	sp|P00739|HPTR_HUMAN/sp|P00738|HPT_HUMAN	126/184
ADTHDEILEGLNFJLTEIPEAQIHEGFQELLR	5 4 1 0 0	(N(N(H(H(N(H)))(H(N(H(A)))))))	sp|P01009|A1AT_HUMAN	107
QVLFLDTVYGJCSTHFTVK	5 2 0 0 0	(N(N(H(H)(H(H(H))))))	sp|P04114|APOB_HUMAN	185
JISDGFDGIPDNVDAALALPAHSY	5 4 2 0 0	(N(N(H(H(N(H(A))))(H(N(H(A)))))))	sp|P04004|VTNC_HUMAN	242
YLGJATAIFFLPDEGK	5 4 2 0 0	(N(N(H(H(N(H(A))))(H(N(H(A)))))))	sp|P01009|A1AT_HUMAN	271
GCVLLSYLJETVTVSASLESVR	5 4 2 0 0	(N(N(H(H(N(H(A))))(H(N(H(A)))))))	sp|P01023|A2MG_HUMAN	55
NEEYJK	6 5 3 0 0	(N(N(H(H(N(H(A))))(H(N(H(A)))(N(H(A)))))))	sp|P02763|A1AG1_HUMAN/sp|P19652|A1AG2_HUMAN	56/56
VVLHPJYSQVDIGLIK	5 4 2 0 1	(N(N(H(H(N(H(A))))(H(N(F)(H(A)))))))	sp|P00738|HPT_HUMAN	241
VDKDLQSLEDILHQVEJK	3 3 0 0 0	(N(N(H(H)(H(N)))))	sp|P02679|FIBG_HUMAN	78
VVLHPJYSQVDIGLIK	6 5 2 0 0	(N(N(H(H(N(H(A))))(H(N(H))(N(H(A)))))))	sp|P00738|HPT_HUMAN	241
MDPNAAYVJMSNHHR	5 4 2 0 0	(N(N(H(H(N(H(A))))(H(N(H(A)))))))	sp|P08185|CBG_HUMAN	31
YKJNSDISSTR	5 3 1 0 1	(N(F)(N(H(H(H))(H(N(H(A)))))))	sp|P01871|IGHM_HUMAN	46
TLJQSSDELQLSMGNAMFVK	5 4 2 0 0	(N(N(H(H(N(H(A))))(H(N(H(A)))))))	sp|P01011|AACT_HUMAN	127
QLHVEHDGESCSJSSHQQILETGEGSPSLK	6 5 3 0 1	(N(F)(N(H(H(N(H(A))))(H(N(H(A)))(N(H(A)))))))	sp|P29622|KAIN_HUMAN	33
LAGKPTHVJVSVVMAEVDGTCY	5 5 2 0 1	(N(F)(N(H(H(N(H(A))))(H(N)(N(H(A)))))))	sp|P01876|IGHA1_HUMAN	340
LGACJDTLQQLMEVFK	5 4 2 0 1	(N(N(H(H(N(H(A))))(H(N(F)(H(A)))))))	sp|P01008|ANT3_HUMAN	128
GSFPWQAKMVSHHJLTTGATLINEQWLLTTAK	4 5 1 0 2	(N(N(H(H(N(H(A))))(H(N(F))(N(F))))))	sp|P00739|HPTR_HUMAN/sp|P00738|HPT_HUMAN	126/184
JLSMPLLPADFHK	5 4 2 0 0	(N(N(H(H(N(H(A))))(H(N(H(A)))))))	sp|P05546|HEP2_HUMAN	49
FJLTEIPEAQIHEGFQELLR	6 5 3 0 1	(N(N(H(H(N(F)(H(A))))(H(N(H(A)))(N(H(A)))))))	sp|P01009|A1AT_HUMAN	107
AALAAFNAQNJGSNFQLEEISR	5 4 2 0 0	(N(N(H(H(N(H(A))))(H(N(H(A)))))))	sp|P02765|FETUA_HUMAN	176
GCVLLSYLJETVTVSASLESVR	5 5 1 0 1	(N(F)(N(H(H(N)(N(H)))(H(N(H(A)))))))	sp|P01023|A2MG_HUMAN	55
CANLVPVPITJATLDQITGK	6 5 3 0 2	(N(F)(N(H(H(N(F)(H(A))))(H(N(H(A)))(N(H(A)))))))	sp|P02763|A1AG1_HUMAN	33
IQSPLFTLDANADIGJGTTSANEAGIAASITAK	5 4 2 0 0	(N(N(H(H(N(H(A))))(H(N(H(A)))))))	sp|P04114|APOB_HUMAN	2779
SVQEIQATFFYFTPJKTEDTIFLR	6 5 3 0 1	(N(N(H(H(N(F)(H(A))))(H(N(H(A)))(N(H(A)))))))	sp|P02763|A1AG1_HUMAN/sp|P19652|A1AG2_HUMAN	72/72
VEJTTVYYLVLDVQESDCSVLSR	5 4 2 0 0	(N(N(H(H(N(H(A))))(H(N(H(A)))))))	sp|P04196|HRG_HUMAN	63
IFEPQGISFLETESTFMTNQLVDALTTWQJK	5 4 2 0 0	(N(N(H(H(N(H(A))))(H(N(H(A)))))))	sp|Q14624|ITIH4_HUMAN	207
NVIFSPLSISTALAFLSLGAHJTTLTEILK	6 5 3 0 0	(N(N(H(H(N(H(A))))(H(N(H(A)))(N(H(A)))))))	sp|P01011|AACT_HUMAN	93
EJLTAPGSDSAVFFEQGTTR	6 5 3 0 0	(N(N(H(H(N(H(A))))(H(N(H(A)))(N(H(A)))))))	sp|P00450|CERU_HUMAN	397
SLGNVJFTVSAEALESQELCGTEVPSVPEHGR	5 2 0 0 0	(N(N(H(H)(H(H(H))))))	sp|P01023|A2MG_HUMAN	869
QLAHQSJSTNIFFSPVSIATAFAMLSLGTK	5 4 1 0 0	(N(N(H(H(N(H)))(H(N(H(A)))))))	sp|P01009|A1AT_HUMAN	70
VSJQTLSLFFTVLQDVPVR	6 4 1 0 0	(N(N(H(H(H))(H(N(H))(N(H(A)))))))	sp|P01023|A2MG_HUMAN	1424
LVPVPITJATLDQITGK	5 4 1 0 0	(N(N(H(H(N(H)))(H(N(H(A)))))))	sp|P02763|A1AG1_HUMAN	33
VVLHPJYSQVDIGLIK	6 5 3 0 2	(N(F)(N(H(H(N(F)(H(A))))(H(N(H(A)))(N(H(A)))))))	sp|P00738|HPT_HUMAN	241
GJGSLR	5 4 2 0 0	(N(N(H(H(N(H(A))))(H(N(H(A)))))))	sp|P43268|ETV4_HUMAN	25
ALPQPQJVTSLLGCTH	5 4 1 0 0	(N(N(H(H(N(H)))(H(N(H(A)))))))	sp|P02790|HEMO_HUMAN	453
SLTFJETYQDISELVYGAK	6 3 1 0 0	(N(N(H(H)(H(H)(H(N(H(A))))))))	sp|P01008|ANT3_HUMAN	187
LVPVPITJATLDR	6 5 3 0 0	(N(N(H(H(N(H(A))))(H(N(H(A)))(N(H(A)))))))	sp|P19652|A1AG2_HUMAN	33
FJLTETSEAEIHQSFQHLLR	7 6 4 0 1	(N(N(H(H(N(H(A)))(N(H(A))))(H(N(H(A)))(N(F)(H(A)))))))	sp|P01011|AACT_HUMAN	106
VDKDLQSLEDILHQVEJK	5 4 2 0 0	(N(N(H(H(N(H(A))))(H(N(H(A)))))))	sp|P02679|FIBG_HUMAN	78
AFNKFSJLTQHK	6 3 2 0 1	(N(N(H(H(H)(H))(H(N(F)(H(A(A))))))))	sp|Q5SXM1|ZN678_HUMAN	251
QQQHLFGSJVTDCSGJFCLFR	6 5 3 0 0	(N(N(H(H(N(H(A))))(H(N(H(A)))(N(H(A)))))))	sp|P02787|TRFE_HUMAN	630
STGKPTLYJVSLVMSDTAGTC	7 2 0 0 0	(N(N(H(H(H)(H))(H(H)(H)))))	sp|P0DOX6|IGM_HUMAN/sp|P01871|IGHM_HUMAN	563/440
IVLDPSGSMNIYLVLDGSDSIGASJFTGAK	5 4 2 0 0	(N(N(H(H(N(H(A))))(H(N(H(A)))))))	sp|P00751|CFAB_HUMAN	285
QDQCIYJTTYLNVQR	6 5 2 0 0	(N(N(H(H(N(H(A))))(H(N(H))(N(H(A)))))))	sp|P02763|A1AG1_HUMAN	93
SLGNVJFTVSAEALESQELCGTEVPSVPEHGRK	6 3 1 0 0	(N(N(H(H)(H(H)(H(N(H(A))))))))	sp|P01023|A2MG_HUMAN	869
SVQEIQATFFYFTPJKTEDTIFLR	6 5 1 0 4	(N(F)(N(H(H(N(F)(H(A))))(H(N(H)(F))(N(H)(F))))))	sp|P02763|A1AG1_HUMAN/sp|P19652|A1AG2_HUMAN	72/72
QJQCFYJSSYLNVQR	7 6 3 0 0	(N(N(H(H(N(H))(N(H(A))))(H(N(H(A)))(N(H(A)))))))	sp|P19652|A1AG2_HUMAN	88
GLKFJLTETSEAEIHQSFQHLLR	7 6 4 0 2	(N(N(H(H(N(H(A)))(N(F)(H(A))))(H(N(H(A)))(N(F)(H(A)))))))	sp|P01011|AACT_HUMAN	106
ADTHDEILEGLNFJLTEIPEAQIHEGFQEL	5 4 2 0 0	(N(N(H(H(N(H(A))))(H(N(H(A)))))))	sp|P01009|A1AT_HUMAN	107
QDQCIYJTTYLNVQR	7 6 3 0 1	(N(F)(N(H(H(N(H(A))))(H(N(H(A)))(N(H(N(H(A)))))))))	sp|P02763|A1AG1_HUMAN	93
QQQHLFGSJVTDCSGJFCLFR	5 4 2 0 0	(N(N(H(H(N(H(A))))(H(N(H(A)))))))	sp|P02787|TRFE_HUMAN	630
ADTHDEILEGLNFJLTEIPEAQIHEGFQELLR	6 5 3 0 2	(N(F)(N(H(H(N(F)(H(A))))(H(N(H(A)))(N(H(A)))))))	sp|P01009|A1AT_HUMAN	107
ADTHDEILEGLNFJLTEIPEAQIHEGFQELLR	6 5 3 0 1	(N(N(H(H(N(F)(H(A))))(H(N(H(A)))(N(H(A)))))))	sp|P01009|A1AT_HUMAN	107
LVPVPITJATLDQITGK	6 5 3 0 1	(N(N(H(H(N(F)(H(A))))(H(N(H(A)))(N(H(A)))))))	sp|P02763|A1AG1_HUMAN	33
ADTHDEILEGLNFJLTEIPEAQIHEGFQELLR	6 4 1 0 0	(N(N(H(H(H))(H(N(H))(N(H(A)))))))	sp|P01009|A1AT_HUMAN	107
QQQHLFGSJVTDCSGJFCLFR	5 4 2 0 1	(N(F)(N(H(H(N(H(A))))(H(N(H(A)))))))	sp|P02787|TRFE_HUMAN	630
LVPVPITJATLDQITGK	5 4 2 0 0	(N(N(H(H(N(H(A))))(H(N(H(A)))))))	sp|P02763|A1AG1_HUMAN	33
STGKPTLYJVSLVMSDTAGTC	6 2 0 0 0	(N(N(H(H)(H(H)(H)(H)))))	sp|P0DOX6|IGM_HUMAN/sp|P01871|IGHM_HUMAN	563/440
MJESLEPSSSSGSNGKGPAVGDAPAPQ	4 4 0 0 0	(N(N(H(H(N))(H(N(H))))))	sp|O95716|RAB3D_HUMAN	188
QLAHQSJSTNIFFSPVSIATAFAMLSLGTK	5 4 2 0 1	(N(F)(N(H(H(N(H(A))))(H(N(H(A)))))))	sp|P01009|A1AT_HUMAN	70
ALQAVYSMMSWPDDVPPEGWJR	5 4 2 0 0	(N(N(H(H(N(H(A))))(H(N(H(A)))))))	sp|P00751|CFAB_HUMAN	378
QAJGTWNIGDERPSCR	6 3 1 0 1	(N(N(H(H(H)(H))(H(N(F)(H(A)))))))	sp|Q96PZ7|CSMD1_HUMAN	2605
ALPQPQJVTSLLGCTH	6 5 2 0 0	(N(N(H(H(N(H(A))))(H(N(H))(N(H(A)))))))	sp|P02790|HEMO_HUMAN	453
GLKFJLTETSEAEIHQSFQHLLR	6 5 3 0 0	(N(N(H(H(N(H(A))))(H(N(H(A)))(N(H(A)))))))	sp|P01011|AACT_HUMAN	106
SWPAVGJCSSALR	5 4 1 0 0	(N(N(H(H(N(H)))(H(N(H(A)))))))	sp|P02790|HEMO_HUMAN	187
MVSHHJLTTGATLINEQWLLTTAK	7 6 3 0 0	(N(N(H(H(N(H))(N(H(A))))(H(N(H(A)))(N(H(A)))))))	sp|P00739|HPTR_HUMAN/sp|P00738|HPT_HUMAN	126/184
NEEYJK	5 4 2 0 0	(N(N(H(H(N(H(A))))(H(N(H(A)))))))	sp|P02763|A1AG1_HUMAN/sp|P19652|A1AG2_HUMAN	56/56
SLTFJETYQDISELVYGAK	5 4 2 0 0	(N(N(H(H(N(H(A))))(H(N(H(A)))))))	sp|P01008|ANT3_HUMAN	187
QDQCIYJTTYLNVQR	6 5 3 0 0	(N(N(H(H(N(H(A))))(H(N(H(A)))(N(H(A)))))))	sp|P02763|A1AG1_HUMAN	93
STGKPTLYJVSLVMSDTAGTC	9 2 0 0 0	(N(N(H(H)(H(H)(H(H(H(H(H)))))))))	sp|P0DOX6|IGM_HUMAN/sp|P01871|IGHM_HUMAN	563/440
QDQCIYJTTYLNVQR	7 6 4 0 0	(N(N(H(H(N(H(A)))(N(H(A))))(H(N(H(A)))(N(H(A)))))))	sp|P02763|A1AG1_HUMAN	93
VVLHPJYSQVDIGLIK	5 4 2 0 0	(N(N(H(H(N(H(A))))(H(N(H(A)))))))	sp|P00738|HPT_HUMAN	241
ADTHDEILEGLNFJLTEIPEAQIHEGFQELLR	6 5 2 0 0	(N(N(H(H(N(H(A))))(H(N(H))(N(H(A)))))))	sp|P01009|A1AT_HUMAN	107
SVQEIQATFFYFTPJKTEDTIFLR	7 6 2 0 0	(N(N(H(H(N(H))(N(H(A))))(H(N(H))(N(H(A)))))))	sp|P02763|A1AG1_HUMAN/sp|P19652|A1AG2_HUMAN	72/72
VSJQTLSLFFTVLQDVPVR	5 4 2 0 0	(N(N(H(H(N(H(A))))(H(N(H(A)))))))	sp|P01023|A2MG_HUMAN	1424
QLAHQSJSTNIFFSPVSIATAFAMLSLGTK	5 4 2 0 0	(N(N(H(H(N(H(A))))(H(N(H(A)))))))	sp|P01009|A1AT_HUMAN	70
GLTFQQJASSMCVPDQDTAIR	5 5 1 0 1	(N(F)(N(H(H(N)(N(H)))(H(N(H(A)))))))	sp|P0DOX6|IGM_HUMAN/sp|P01871|IGHM_HUMAN	332/209
QLAHQSJSTNIFFSPVSIATAFAMLSLGTK	6 4 1 0 2	(N(F)(N(H(H(H))(H(N(H)(F))(N(H(A)))))))	sp|P01009|A1AT_HUMAN	70
QVLFLDTVYGJCSTHFTVK	8 2 0 0 0	(N(N(H(H)(H(H)(H(H(H(H))))))))	sp|P04114|APOB_HUMAN	185
SLGNVJFTVSAEALESQELCGTEVPSVPEHGRK	5 3 1 0 0	(N(N(H(H(H))(H(N(H(A)))))))	sp|P01023|A2MG_HUMAN	869
QEIQATFFYFTPJKTEDTIFLR	6 6 1 0 4	(N(N(H(H(N(F))(N(H)(F)))(H(N(H)(F))(N(F)(H(A)))))))	sp|P02763|A1AG1_HUMAN/sp|P19652|A1AG2_HUMAN	72/72
LNAENJATFYFK	6 5 3 0 1	(N(N(H(H(N(F)(H(A))))(H(N(H(A)))(N(H(A)))))))	sp|P01042|KNG1_HUMAN	294
KIVLDPSGSMNIYLVLDGSDSIGASJFTGAK	5 4 2 0 0	(N(N(H(H(N(H(A))))(H(N(H(A)))))))	sp|P00751|CFAB_HUMAN	285
CANLVPVPITJATLDQITGK	6 5 2 0 0	(N(N(H(H(N(H(A))))(H(N(H))(N(H(A)))))))	sp|P02763|A1AG1_HUMAN	33
SVQEIQATFFYFTPJKTEDTIFLR	5 4 2 0 0	(N(N(H(H(N(H(A))))(H(N(H(A)))))))	sp|P02763|A1AG1_HUMAN/sp|P19652|A1AG2_HUMAN	72/72
SVQEIQATFFYFTPJKTEDTIFLR	7 6 3 0 2	(N(N(H(H(N(H)(F))(N(H(A))))(H(N(H(A)))(N(F)(H(A)))))))	sp|P02763|A1AG1_HUMAN/sp|P19652|A1AG2_HUMAN	72/72
MVSHHJLTTGATLINEQWLLTTAK	5 4 0 0 2	(N(N(H(H(N(H(F))))(H(N(H(F)))))))	sp|P00739|HPTR_HUMAN/sp|P00738|HPT_HUMAN	126/184
QDQCIYJTTYLNVQR	7 6 3 0 0	(N(N(H(H(N(H))(N(H(A))))(H(N(H(A)))(N(H(A)))))))	sp|P02763|A1AG1_HUMAN	93
FVEGSHJSTVSLTTK	5 4 1 0 0	(N(N(H(H(N(H)))(H(N(H(A)))))))	sp|P04114|APOB_HUMAN	3411
VVLHPJYSQVDIGLIK	6 4 2 0 0	(N(N(H(H(H))(H(N(H(A)))(N(H(A)))))))	sp|P00738|HPT_HUMAN	241
LVPVPITJATLDQITGK	6 5 3 0 0	(N(N(H(H(N(H(A))))(H(N(H(A)))(N(H(A)))))))	sp|P02763|A1AG1_HUMAN	33
MVSHHJLTTGATLINEQWLLTTAK	6 5 2 0 0	(N(N(H(H(N(H(A))))(H(N(H))(N(H(A)))))))	sp|P00739|HPTR_HUMAN/sp|P00738|HPT_HUMAN	126/184
LGJWSAMPSCK	5 4 2 0 0	(N(N(H(H(N(H(A))))(H(N(H(A)))))))	sp|P02749|APOH_HUMAN	253
SWPAVGJCSSALR	6 5 3 0 0	(N(N(H(H(N(H(A))))(H(N(H(A)))(N(H(A)))))))	sp|P02790|HEMO_HUMAN	187
LSLHRPALEDLLLGSEAJLTCTLTGLR	5 5 2 0 1	(N(N(H(N)(H(N(H(A))))(H(N(F)(H(A)))))))	sp|P01876|IGHA1_HUMAN/sp|P0DOX2|IGA2_HUMAN/sp|P01877|IGHA2_HUMAN	144/246/131
IDSTGJVTNELR	6 2 0 0 0	(N(N(H(H)(H(H)(H)(H)))))	sp|O75882|ATRN_HUMAN	416
GLTFQQJASSMCVPDQDTAIR	5 4 1 0 1	(N(F)(N(H(H(N(H)))(H(N(H(A)))))))	sp|P0DOX6|IGM_HUMAN/sp|P01871|IGHM_HUMAN	332/209
AVJITSENLIDDVVSLIR	5 4 2 0 0	(N(N(H(H(N(H(A))))(H(N(H(A)))))))	sp|P02748|CO9_HUMAN	415
PALEDLLLGSEAJLTCTLTGLR	4 5 0 0 1	(N(F)(N(H(N)(H(N))(H(N(H))))))	sp|P01876|IGHA1_HUMAN/sp|P0DOX2|IGA2_HUMAN/sp|P01877|IGHA2_HUMAN	144/246/131
CANLVPVPITJATLDR	6 5 2 0 0	(N(N(H(H(N(H(A))))(H(N(H))(N(H(A)))))))	sp|P19652|A1AG2_HUMAN	33
AFITJFSMIIDGMTYPGIIK	5 4 2 0 0	(N(N(H(H(N(H(A))))(H(N(H(A)))))))	sp|Q14624|ITIH4_HUMAN	81
VSJQTLSLFFTVLQDVPVR	6 5 1 0 0	(N(N(H(H(N(H(A))))(H(N(H))(N(H))))))	sp|P01023|A2MG_HUMAN	1424
LAGKPTHVJVSVVMAEVDGTC	5 5 2 0 1	(N(F)(N(H(H(N(H(A))))(H(N)(N(H(A)))))))	sp|P01876|IGHA1_HUMAN	340
JISDGFDGIPDNVDAALALPAHSYSGR	6 5 3 0 0	(N(N(H(H(N(H(A))))(H(N(H(A)))(N(H(A)))))))	sp|P04004|VTNC_HUMAN	242
CANLVPVPITJATLDR	6 5 2 0 1	(N(N(H(H(N(H)))(H(N(H(A)))(N(F)(H(A)))))))	sp|P19652|A1AG2_HUMAN	33
VTISGVYDLGDVLEEMGIADLFTNQAJFSR	5 4 2 0 0	(N(N(H(H(N(H(A))))(H(N(H(A)))))))	sp|P08185|CBG_HUMAN	330
SVQEIQATFFYFTPJKTEDTIFLR	6 5 3 0 2	(N(N(H(H(N(F)(H(A))))(H(N(H(A)))(N(F)(H(A)))))))	sp|P02763|A1AG1_HUMAN/sp|P19652|A1AG2_HUMAN	72/72
ADTHDEILEGLNFJLTEIPEAQIHEGFQELLR	7 6 4 0 1	(N(N(H(H(N(H(A)))(N(H(A))))(H(N(H(A)))(N(F)(H(A)))))))	sp|P01009|A1AT_HUMAN	107
APDKNVIFSPLSISTALAFLSLGAHJTTLTEILK	6 5 3 0 0	(N(N(H(H(N(H(A))))(H(N(H(A)))(N(H(A)))))))	sp|P01011|AACT_HUMAN	93
RGIJFSR	5 5 1 0 1	(N(F)(N(H(N)(H(N(H)))(H(N(H(A)))))))	sp|Q4V348|Z658B_HUMAN/sp|Q5TYW1|ZN658_HUMAN	61/305
LNAENJATFYFK	6 5 3 0 0	(N(N(H(H(N(H(A))))(H(N(H(A)))(N(H(A)))))))	sp|P01042|KNG1_HUMAN	294
EJGTVSR	6 5 3 0 0	(N(N(H(H(N(H(A))))(H(N(H(A)))(N(H(A)))))))	sp|P19652|A1AG2_HUMAN	103
ELHHLQEQJVSNAFLDKGEFYIGSK	6 5 3 0 2	(N(F)(N(H(H(N(F)(H(A))))(H(N(H(A)))(N(H(A)))))))	sp|P00450|CERU_HUMAN	762
YAEDKFJETTEK	6 5 3 0 0	(N(N(H(H(N(H(A))))(H(N(H(A)))(N(H(A)))))))	sp|P43652|AFAM_HUMAN	402
SVQEIQATFFYFTPJKTEDTIFLR	6 5 2 0 0	(N(N(H(H(N(H(A))))(H(N(H))(N(H(A)))))))	sp|P02763|A1AG1_HUMAN/sp|P19652|A1AG2_HUMAN	72/72
YLGJATAIFFLPDEGK	5 4 1 0 0	(N(N(H(H(N(H)))(H(N(H(A)))))))	sp|P01009|A1AT_HUMAN	271
ASJLSGAALR	5 4 2 0 0	(N(N(H(H(N(H(A))))(H(N(H(A)))))))	sp|Q4AC94|C2CD3_HUMAN	1546
LVPVPITJATLDR	5 4 1 0 0	(N(N(H(H(N(H)))(H(N(H(A)))))))	sp|P19652|A1AG2_HUMAN	33
LAGKPTHVJVSVVMAEVDGTC	5 5 1 0 1	(N(F)(N(H(N)(H(N(H)))(H(N(H(A)))))))	sp|P01876|IGHA1_HUMAN	340
QLAHQSJSTNIFFSPVSIATAFAMLSLGTK	6 5 2 0 0	(N(N(H(H(N(H(A))))(H(N(H))(N(H(A)))))))	sp|P01009|A1AT_HUMAN	70
SVQEIQATFFYFTPJKTEDTIFLR	7 6 3 0 1	(N(N(H(H(N(H)(F))(N(H(A))))(H(N(H(A)))(N(H(A)))))))	sp|P02763|A1AG1_HUMAN/sp|P19652|A1AG2_HUMAN	72/72
FSDGLESJSSTQFEVK	10 2 0 0 0	(N(N(H(H(H)(H))(H(H(H))(H(H(H)))))))	sp|P0C0L4|CO4A_HUMAN/sp|P0C0L5|CO4B_HUMAN	226/226
SVQEIQATFFYFTPJKTEDTIFLR	6 5 2 0 1	(N(N(H(H(N(H)(F)))(H(N(H(A)))(N(H(A)))))))	sp|P02763|A1AG1_HUMAN/sp|P19652|A1AG2_HUMAN	72/72
VSJQTLSLFFTVLQDVPVR	5 4 2 0 1	(N(N(H(H(N(H(A))))(H(N(F)(H(A)))))))	sp|P01023|A2MG_HUMAN	1424
PALEDLLLGSEAJLTCTLTGLR	5 5 0 0 0	(N(N(H(N)(H(N(H)))(H(N(H))))))	sp|P01876|IGHA1_HUMAN/sp|P0DOX2|IGA2_HUMAN/sp|P01877|IGHA2_HUMAN	144/246/131
ALPQPQJVTSLLGCTH	5 4 2 0 1	(N(F)(N(H(H(N(H(A))))(H(N(H(A)))))))	sp|P02790|HEMO_HUMAN	453
GCVLLSYLJETVTVSASLESVR	5 4 2 0 1	(N(N(H(H(N(H(A))))(H(N(F)(H(A)))))))	sp|P01023|A2MG_HUMAN	55
SIJTTNVMGTSLTVR	5 2 0 0 0	(N(N(H(H(H)(H(H))))))	sp|P01023|A2MG_HUMAN	410
QLDMLDLSJNSLASVPEGLWASLGQPNWDMR	6 5 3 0 0	(N(N(H(H(N(H(A))))(H(N(H(A)))(N(H(A)))))))	sp|P02750|A2GL_HUMAN	269
EGDHEFLEVPEAQEDVEATFPVHQPGJYSCSYR	6 5 3 0 0	(N(N(H(H(N(H(A))))(H(N(H(A)))(N(H(A)))))))	sp|P04217|A1BG_HUMAN	179
PALEDLLLGSEAJLTCTLTGLR	4 5 0 0 0	(N(N(H(H(N)(N))(H(N(H))))))	sp|P01876|IGHA1_HUMAN/sp|P0DOX2|IGA2_HUMAN/sp|P01877|IGHA2_HUMAN	144/246/131
PALEDLLLGSEAJLTCTLTGLR	5 5 1 0 0	(N(N(H(H(N)(N(H)))(H(N(H(A)))))))	sp|P01876|IGHA1_HUMAN/sp|P0DOX2|IGA2_HUMAN/sp|P01877|IGHA2_HUMAN	144/246/131
AALAAFNAQNJGSNFQLEEISR	6 5 3 0 0	(N(N(H(H(N(H(A))))(H(N(H(A)))(N(H(A)))))))	sp|P02765|FETUA_HUMAN	176
VSJQTLSLFFTVLQDVPVR	5 4 1 0 0	(N(N(H(H(N(H)))(H(N(H(A)))))))	sp|P01023|A2MG_HUMAN	1424
LSLHRPALEDLLLGSEAJLTCTLTGLR	6 5 1 0 0	(N(N(H(H(N(H(A))))(H(N(H))(N(H))))))	sp|P01876|IGHA1_HUMAN/sp|P0DOX2|IGA2_HUMAN/sp|P01877|IGHA2_HUMAN	144/246/131
ADTHDEILEGLNFJLTEIPEAQIHEGFQELLR	5 4 1 0 1	(N(F)(N(H(H(N(H)))(H(N(H(A)))))))	sp|P01009|A1AT_HUMAN	107
VSJQTLSLFFTVLQDVPVR	5 5 0 0 2	(N(F)(N(H(H(N(F)))(H(N(H))(N(H))))))	sp|P01023|A2MG_HUMAN	1424
SQILEGLGFJLTELSESDVHR	6 5 3 0 0	(N(N(H(H(N(H(A))))(H(N(H(A)))(N(H(A)))))))	sp|P29622|KAIN_HUMAN	108
JRTFAFR	3 2 0 0 0	(N(N(H(H)(H))))	sp|Q96P48|ARAP1_HUMAN	394
ALPQPQJVTSLLGCTH	5 4 2 0 0	(N(N(H(H(N(H(A))))(H(N(H(A)))))))	sp|P02790|HEMO_HUMAN	453
JTSKQMNLNPMDSPHSP	5 4 1 0 0	(N(N(H(H(N(H)))(H(N(H(A)))))))	sp|Q71F56|MD13L_HUMAN	535
QSHASDTSVVLSMDNJR	6 3 2 0 1	(N(N(H(H(H)(H))(H(N(F)(H(A(A))))))))	sp|Q01546|K22O_HUMAN	345
VVLHPJYSQVDIGLIK	4 3 1 0 0	(N(N(H(H)(H(N(H(A)))))))	sp|P00738|HPT_HUMAN	241
EEQFJSTYR	5 4 0 0 1	(N(F)(N(H(H(N(H)))(H(N(H))))))	sp|P01861|IGHG4_HUMAN	177
FJLTETSEAEIHQSFQHLLR	7 6 4 0 0	(N(N(H(H(N(H(A)))(N(H(A))))(H(N(H(A)))(N(H(A)))))))	sp|P01011|AACT_HUMAN	106
QDQCIYJTTYLNVQR	7 6 2 0 0	(N(N(H(H(N(H))(N(H(A))))(H(N(H))(N(H(A)))))))	sp|P02763|A1AG1_HUMAN	93
DIVEYYJDSJGSHVLQGR	6 5 3 0 1	(N(N(H(H(N(F)(H(A))))(H(N(H(A)))(N(H(A)))))))	sp|P25311|ZA2G_HUMAN	109
NEEYJK	5 4 2 0 1	(N(F)(N(H(H(N(H(A))))(H(N(H(A)))))))	sp|P02763|A1AG1_HUMAN/sp|P19652|A1AG2_HUMAN	56/56
IPCSQPPQIEHGTIJSSR	6 5 3 0 0	(N(N(H(H(N(H(A))))(H(N(H(A)))(N(H(A)))))))	sp|P08603|CFAH_HUMAN	882
PALEDLLLGSEAJLTCTLTGLR	5 5 0 0 0	(N(N(H(H(N))(H(N(H))(N(H))))))	sp|P01876|IGHA1_HUMAN/sp|P0DOX2|IGA2_HUMAN/sp|P01877|IGHA2_HUMAN	144/246/131
SVQEIQATFFYFTPJKTEDTIFLR	7 6 3 0 0	(N(N(H(H(N(H))(N(H(A))))(H(N(H(A)))(N(H(A)))))))	sp|P02763|A1AG1_HUMAN/sp|P19652|A1AG2_HUMAN	72/72
MVSHHJLTTGATLINEQWLLTTAK	6 4 2 0 0	(N(N(H(H(N(H(A))))(H(N(H(H)(A)))))))	sp|P00739|HPTR_HUMAN/sp|P00738|HPT_HUMAN	126/184
GCVLLSYLJETVTVSASLESVR	6 5 1 0 0	(N(N(H(H(N(H(A))))(H(N(H))(N(H))))))	sp|P01023|A2MG_HUMAN	55
FEVDSPVYJATWSASLK	5 4 2 0 0	(N(N(H(H(N(H(A))))(H(N(H(A)))))))	sp|P04114|APOB_HUMAN	3895
QLAHQSJSTNIFFSPVSIATAFAMLSLGTK	7 5 2 0 3	(N(F)(N(H(N)(H(H)(H))(H(N(F)(H(A)))(N(F)(H(A)))))))	sp|P01009|A1AT_HUMAN	70
SLGNVJFTVSAEALESQELCGTEVPSVPEHGR	6 2 0 0 0	(N(N(H(H(H))(H(H(H))))))	sp|P01023|A2MG_HUMAN	869
EJGTISR	7 6 4 0 2	(N(N(H(H(N(H(A)))(N(F)(H(A))))(H(N(H(A)))(N(F)(H(A)))))))	sp|P02763|A1AG1_HUMAN	103
MVSHHJLTTGATLINEQWLLTTAK	6 5 3 0 0	(N(N(H(H(N(H(A))))(H(N(H(A)))(N(H(A)))))))	sp|P00739|HPTR_HUMAN/sp|P00738|HPT_HUMAN	126/184
VYKPSAGJNSLYR	5 4 2 0 1	(N(F)(N(H(H(N(H(A))))(H(N(H(A)))))))	sp|P02749|APOH_HUMAN	162
ADTHDEILEGLNFJLTEIPEAQIHEGFQELLR	5 4 2 0 0	(N(N(H(H(N(H(A))))(H(N(H(A)))))))	sp|P01009|A1AT_HUMAN	107
QLAHQSJSTNIFFSPVSIATAFAMLSLGTK	5 4 1 0 2	(N(F)(N(H(H(N(H(A))))(H(N(H(F)))))))	sp|P01009|A1AT_HUMAN	70
JISDGFDGIPDNVDAALALPAHSYSGR	6 5 3 0 1	(N(N(H(H(N(F)(H(A))))(H(N(H(A)))(N(H(A)))))))	sp|P04004|VTNC_HUMAN	242
GCVLLSYLJETVTVSASLESVR	5 4 1 0 0	(N(N(H(H(N(H)))(H(N(H(A)))))))	sp|P01023|A2MG_HUMAN	55
QLAHQSJSTNIFFSPVSIATAFAMLSLGTK	6 5 2 0 2	(N(F)(N(H(H(N(H(A))))(H(N(H)(F))(N(H(A)))))))	sp|P01009|A1AT_HUMAN	70
QJQCFYJSSYLNVQR	7 6 4 0 1	(N(N(H(H(N(H(A)))(N(H(A))))(H(N(H(A)))(N(F)(H(A)))))))	sp|P19652|A1AG2_HUMAN	88
CSDGWSFDATTLDDJGTMLFFK	5 4 2 0 0	(N(N(H(H(N(H(A))))(H(N(H(A)))))))	sp|P02790|HEMO_HUMAN	64
QDQCIYJTTYLNVQR	7 6 3 0 1	(N(N(H(H(N(H))(N(F)(H(A))))(H(N(H(A)))(N(H(A)))))))	sp|P02763|A1AG1_HUMAN	93
LYHFLLGAWSLJATELDPCPLSPELLGLTK	6 5 3 0 1	(N(N(H(H(N(F)(H(A))))(H(N(H(A)))(N(H(A)))))))	sp|Q96PD5|PGRP2_HUMAN	77
LSLHRPALEDLLLGSEAJLTCTLTGLR	5 5 1 0 0	(N(N(H(N)(H(N(H)))(H(N(H(A)))))))	sp|P01876|IGHA1_HUMAN/sp|P0DOX2|IGA2_HUMAN/sp|P01877|IGHA2_HUMAN	144/246/131
ADTHDEILEGLNFJLTEIPEAQIHEGFQELLR	6 5 3 0 0	(N(N(H(H(N(H(A))))(H(N(H(A)))(N(H(A)))))))	sp|P01009|A1AT_HUMAN	107
ADTHDEILEGLNFJLTEIPEAQIHEGFQELLR	6 5 3 0 2	(N(N(H(H(N(F)(H(A))))(H(N(H(A)))(N(F)(H(A)))))))	sp|P01009|A1AT_HUMAN	107
VTQVYAEJGTVLQGSTVASVYK	5 4 2 0 0	(N(N(H(H(N(H(A))))(H(N(H(A)))))))	sp|P27169|PON1_HUMAN	324
AJLSSQALQMSLDYGFVTPLTSMSIR	5 4 2 0 1	(N(F)(N(H(H(N(H(A))))(H(N(H(A)))))))	sp|P19827|ITIH1_HUMAN	588
AALAAFNAQNJGSNFQLEEISR	7 5 2 0 1	(N(N(H(N)(H(H)(H))(H(N(H(A)))(N(F)(H(A)))))))	sp|P02765|FETUA_HUMAN	176
GLTFQQJASSMCVPDQDTAIR	5 5 1 0 1	(N(F)(N(H(N)(H(N(H)))(H(N(H(A)))))))	sp|P0DOX6|IGM_HUMAN/sp|P01871|IGHM_HUMAN	332/209
PALEDLLLGSEAJLTCTLTGLR	5 5 1 0 1	(N(N(H(H(N(F)))(H(N(H))(N(H(A)))))))	sp|P01876|IGHA1_HUMAN/sp|P0DOX2|IGA2_HUMAN/sp|P01877|IGHA2_HUMAN	144/246/131
JVSVEALASALQLLAR	5 4 2 0 0	(N(N(H(H(N(H(A))))(H(N(H(A)))))))	sp|Q13790|APOF_HUMAN	139
SVQEIQATFFYFTPJKTEDTIFLR	7 6 2 0 1	(N(N(H(H(N(H))(N(H)(F)))(H(N(H(A)))(N(H(A)))))))	sp|P02763|A1AG1_HUMAN/sp|P19652|A1AG2_HUMAN	72/72
LAGKPTHVJVSVVMAEVDGTC	6 5 3 0 1	(N(F)(N(H(H(N(H(A))))(H(N(H(A)))(N(H(A)))))))	sp|P01876|IGHA1_HUMAN	340
FJLTETSEAEIHQSFQHLLR	7 6 3 0 0	(N(N(H(H(N(H))(N(H(A))))(H(N(H(A)))(N(H(A)))))))	sp|P01011|AACT_HUMAN	106
AJLSSQALQMSLDYGFVTPLTSMSIR	5 4 2 0 0	(N(N(H(H(N(H(A))))(H(N(H(A)))))))	sp|P19827|ITIH1_HUMAN	588
ADTHDEILEGLNFJLTEIPEAQIHEGFQELLR	6 5 2 0 1	(N(N(H(H(N(H)(F)))(H(N(H(A)))(N(H(A)))))))	sp|P01009|A1AT_HUMAN	107
LSLHRPALEDLLLGSEAJLTCTLTGLR	5 4 2 0 1	(N(N(H(H(N(H(A))))(H(N(F)(H(A)))))))	sp|P01876|IGHA1_HUMAN/sp|P0DOX2|IGA2_HUMAN/sp|P01877|IGHA2_HUMAN	144/246/131
LSLHRPALEDLLLGSEAJLTCTLTGLR	5 4 1 0 1	(N(N(H(H(N(H)(F)))(H(N(H(A)))))))	sp|P01876|IGHA1_HUMAN/sp|P0DOX2|IGA2_HUMAN/sp|P01877|IGHA2_HUMAN	144/246/131
TLJQSSDELQLSMGNAMFVK	6 5 3 0 0	(N(N(H(H(N(H(A))))(H(N(H(A)))(N(H(A)))))))	sp|P01011|AACT_HUMAN	127
STGKPTLYJVSLVMSDTAGTCY	6 2 0 0 0	(N(N(H(H(H))(H(H)(H)))))	sp|P0DOX6|IGM_HUMAN/sp|P01871|IGHM_HUMAN	563/440
ADTHDEILEGLNFJLTEIPEAQIHEGFQELLR	6 5 3 0 1	(N(F)(N(H(H(N(H(A))))(H(N(H(A)))(N(H(A)))))))	sp|P01009|A1AT_HUMAN	107
ADTHDEILEGLNFJLTEIPEAQIHEGFQELLR	7 6 4 0 0	(N(N(H(H(N(H(A)))(N(H(A))))(H(N(H(A)))(N(H(A)))))))	sp|P01009|A1AT_HUMAN	107
VSJQTLSLFFTVLQDVPVR	5 4 1 0 1	(N(F)(N(H(H(N(H)))(H(N(H(A)))))))	sp|P01023|A2MG_HUMAN	1424
ELHHLQEQJVSNAFLDKGEFYIGSK	5 4 2 0 0	(N(N(H(H(N(H(A))))(H(N(H(A)))))))	sp|P00450|CERU_HUMAN	762
SLGNVJFTVSAEALESQELCGTEVPSVPEHGR	5 2 0 0 0	(N(N(H(H(H(H(H)))))))	sp|P01023|A2MG_HUMAN	869
CANLVPVPITJATLDQITGK	6 5 3 0 0	(N(N(H(H(N(H(A))))(H(N(H(A)))(N(H(A)))))))	sp|P02763|A1AG1_HUMAN	33
FJLTETSEAEIHQSFQHLLR	7 6 4 0 2	(N(N(H(H(N(H(A)))(N(F)(H(A))))(H(N(H(A)))(N(F)(H(A)))))))	sp|P01011|AACT_HUMAN	106
VVGVPYQGJATALFILPSEGK	5 4 2 0 0	(N(N(H(H(N(H(A))))(H(N(H(A)))))))	sp|P05154|IPSP_HUMAN	262
LVPVPITJATLDR	7 6 2 0 0	(N(N(H(H(N(H))(N(H(A))))(H(N(H))(N(H(A)))))))	sp|P19652|A1AG2_HUMAN	33
LSLHRPALEDLLLGSEAJLTCTLTGLR	6 3 1 0 0	(N(N(H(H)(H(H)(H(N(H(A))))))))	sp|P01876|IGHA1_HUMAN/sp|P0DOX2|IGA2_HUMAN/sp|P01877|IGHA2_HUMAN	144/246/131
QMAVPSRJTSKQM	5 4 2 0 0	(N(N(H(H(N(H(A))))(H(N(H(A)))))))	sp|Q71F56|MD13L_HUMAN	535
EEQYJSTYR	5 4 1 0 1	(N(F)(N(H(H(N(H)))(H(N(H(A)))))))	sp|P0DOX5|IGG1_HUMAN/sp|P01857|IGHG1_HUMAN	299/180
ALVSGJNTVPFAVSLVDSTSEK	5 4 2 0 0	(N(N(H(H(N(H(A))))(H(N(H(A)))))))	sp|P07225|PROS_HUMAN	530
STGKPTLYJVSLVMSDTAGTCY	6 2 0 0 0	(N(N(H(H(H(H))(H(H))))))	sp|P0DOX6|IGM_HUMAN/sp|P01871|IGHM_HUMAN	563/440
QDQCIYJTTYLNVQR	7 5 2 0 1	(N(N(H(N)(H(H)(H))(H(N(H(A)))(N(F)(H(A)))))))	sp|P02763|A1AG1_HUMAN	93
QDQCIYJTTYLNVQR	7 6 4 0 2	(N(F)(N(H(H(N(H(A)))(N(H(A))))(H(N(H(A)))(N(F)(H(A)))))))	sp|P02763|A1AG1_HUMAN	93
YLGJATAIFF	5 4 2 0 0	(N(N(H(H(N(H(A))))(H(N(H(A)))))))	sp|P01009|A1AT_HUMAN	271
FSDGLESJSSTQFEVK	8 2 0 0 0	(N(N(H(H)(H(H)(H(H(H(H))))))))	sp|P0C0L4|CO4A_HUMAN/sp|P0C0L5|CO4B_HUMAN	226/226
QLAHQSJSTNIFFSPVSIATAFAMLSLGTK	6 5 2 0 1	(N(N(H(H(N(H)(F)))(H(N(H(A)))(N(H(A)))))))	sp|P01009|A1AT_HUMAN	70
QJQCFYJSSYLNVQR	7 6 2 0 0	(N(N(H(H(N(H))(N(H(A))))(H(N(H))(N(H(A)))))))	sp|P19652|A1AG2_HUMAN	93
PALEDLLLGSEAJLTCTLTGLR	6 5 1 0 0	(N(N(H(H(N(H(A))))(H(N(H))(N(H))))))	sp|P01876|IGHA1_HUMAN/sp|P0DOX2|IGA2_HUMAN/sp|P01877|IGHA2_HUMAN	144/246/131
QVLFLDTVYGJCSTHF	5 2 0 0 0	(N(N(H(H(H(H(H)))))))	sp|P04114|APOB_HUMAN	185
LQNNENJISCVER	5 4 2 0 0	(N(N(H(H(N(H(A))))(H(N(H(A)))))))	sp|Q03591|FHR1_HUMAN/sp|P36980|FHR2_HUMAN	126/126
CANLVPVPITJATLDQITGK	6 5 1 0 4	(N(F)(N(H(H(N(F)(H(A))))(H(N(H)(F))(N(H)(F))))))	sp|P02763|A1AG1_HUMAN	33
STGKPTLYJVSLVMSDTAGTCY	8 2 0 0 0	(N(N(H(H(H(H)))(H(H)(H)(H)))))	sp|P0DOX6|IGM_HUMAN/sp|P01871|IGHM_HUMAN	563/440
LGACJDTLQQLMEVFK	5 4 2 0 0	(N(N(H(H(N(H(A))))(H(N(H(A)))))))	sp|P01008|ANT3_HUMAN	128
EJLTAPGSDSAVFFEQGTTR	5 4 1 0 0	(N(N(H(H(N(H)))(H(N(H(A)))))))	sp|P00450|CERU_HUMAN	397
SLGNVJFTVSAEALESQELCGTEVPSVPEHGR	5 3 1 0 0	(N(N(H(H(H))(H(N(H(A)))))))	sp|P01023|A2MG_HUMAN	869
QLDJKSVIDEIIEHLDKL	4 3 0 0 0	(N(N(H(H)(H(N(H))))))	sp|Q6EBC2|IL31_HUMAN	100
VSJQTLSLFFTVLQDVPVR	6 5 2 0 1	(N(N(H(H(N(H)(F)))(H(N(H(A)))(N(H(A)))))))	sp|P01023|A2MG_HUMAN	1424
VTELQLTSSELDFQPQQELMLQITJASLGLR	5 4 1 0 1	(N(F)(N(H(H(N(H)))(H(N(H(A)))))))	sp|P55058|PLTP_HUMAN	94
GCVLLSYLJETVTVSASLESVR	6 5 1 0 2	(N(F)(N(H(H(N(H)(F)))(H(N(H(N(H(A)))))))))	sp|P01023|A2MG_HUMAN	55
GTAGNALMDGASQLMGEJR	4 3 0 0 0	(N(N(H(H)(H(N(H))))))	sp|P02675|FIBB_HUMAN	394
TNAELFJQSDIVAHLLSSSSSVIDALQYK	9 2 0 0 0	(N(N(H(H)(H(H)(H(H(H(H(H)))))))))	sp|P04114|APOB_HUMAN	3358
VLSJNSDANLELINTWVAK	5 4 2 0 1	(N(N(H(H(N(H(A))))(H(N(F)(H(A)))))))	sp|P05155|IC1_HUMAN	253
LSLHRPALEDLLLGSEAJLTCTLTGLR	5 4 1 0 0	(N(N(H(H(N(H)))(H(N(H(A)))))))	sp|P01876|IGHA1_HUMAN/sp|P0DOX2|IGA2_HUMAN/sp|P01877|IGHA2_HUMAN	144/246/131
QDQCIYJTTYLNVQR	5 4 2 0 0	(N(N(H(H(N(H(A))))(H(N(H(A)))))))	sp|P02763|A1AG1_HUMAN	93
AALAAFNAQNJGSNFQLEEISR	6 5 3 0 1	(N(N(H(H(N(F)(H(A))))(H(N(H(A)))(N(H(A)))))))	sp|P02765|FETUA_HUMAN	176
PALEDLLLGSEAJLTCTLTGLR	5 4 1 0 0	(N(N(H(H(N(H)))(H(N(H(A)))))))	sp|P01876|IGHA1_HUMAN/sp|P0DOX2|IGA2_HUMAN/sp|P01877|IGHA2_HUMAN	144/246/131
LPTQJITFQTESSVAEQEAEFQSPK	6 5 3 0 0	(N(N(H(H(N(H(A))))(H(N(H(A)))(N(H(A)))))))	sp|Q14624|ITIH4_HUMAN	517
JYTLTGR	5 4 1 0 1	(N(F)(N(H(H(N(H)))(H(N(H(A)))))))	sp|P10643|CO7_HUMAN	754
STGKPTLYJVSLVMSDTAGTCY	6 2 0 0 0	(N(N(H(H)(H(H)(H(H))))))	sp|P0DOX6|IGM_HUMAN/sp|P01871|IGHM_HUMAN	563/440
JISDGFDGIPDNVDAALALPAHSYSGR	5 4 1 0 0	(N(N(H(H(N(H)))(H(N(H(A)))))))	sp|P04004|VTNC_HUMAN	242
YLGJATAIFFLPDEGKLQHLENELTHDIITK	5 4 2 0 0	(N(N(H(H(N(H(A))))(H(N(H(A)))))))	sp|P01009|A1AT_HUMAN	271
LAGKPTHVJVSVVMAEVDGTCY	5 5 1 0 1	(N(F)(N(H(H(N)(N(H)))(H(N(H(A)))))))	sp|P01876|IGHA1_HUMAN	340
TLYETEVFSTDFSJISAAK	5 4 2 0 0	(N(N(H(H(N(H(A))))(H(N(H(A)))))))	sp|P05543|THBG_HUMAN	165
QVLFLDTVYGJCSTHFTVK	5 2 0 0 0	(N(N(H(H(H(H(H)))))))	sp|P04114|APOB_HUMAN	185
LSLHRPALEDLLLGSEAJLTCTLTGLR	4 5 1 0 1	(N(F)(N(H(N)(H(N(H))(N(H(A)))))))	sp|P01876|IGHA1_HUMAN/sp|P0DOX2|IGA2_HUMAN/sp|P01877|IGHA2_HUMAN	144/246/131
LPTQJITFQTESSVAEQEAEFQSPK	5 4 2 0 1	(N(F)(N(H(H(N(H(A))))(H(N(H(A)))))))	sp|Q14624|ITIH4_HUMAN	517
FJSSYLQGTNQITGR	5 4 2 0 0	(N(N(H(H(N(H(A))))(H(N(H(A)))))))	sp|P04114|APOB_HUMAN	1523
YLGJATAIFFLPDEGK	6 4 2 0 0	(N(N(H(H(N(H(A))))(H(N(H(H)(A)))))))	sp|P01009|A1AT_HUMAN	271
ADTHDEILEGLNFJLTEIPEAQIHEGFQELLR	5 4 2 0 1	(N(F)(N(H(H(N(H(A))))(H(N(H(A)))))))	sp|P01009|A1AT_HUMAN	107
AFEJVTDLQWLILDHNLLENSK	6 5 2 0 1	(N(F)(N(H(H(N(H(A))))(H(N(H(N(H(A)))))))))	sp|P51884|LUM_HUMAN	88
GFGVAIVGJYTAALPTEAALR	5 4 2 0 0	(N(N(H(H(N(H(A))))(H(N(H(A)))))))	sp|Q96PD5|PGRP2_HUMAN	485
DFVJASSKYEITTIHNLFR	5 4 2 0 0	(N(N(H(H(N(H(A))))(H(N(H(A)))))))	sp|P05546|HEP2_HUMAN	188
TPLTAJITK	3 5 0 0 1	(N(F)(N(H(N)(H(N))(H(N)))))	sp|P0DOX2|IGA2_HUMAN/sp|P01877|IGHA2_HUMAN	320/205
GQAQJY	3 4 0 0 1	(N(N(H(H(N))(H(N(F))))))	sp|Q9NTN9|SEM4G_HUMAN	55
LSLHRPALEDLLLGSEAJLTCTLTGLR	4 5 1 0 0	(N(N(H(H(N)(N))(H(N(H(A)))))))	sp|P01876|IGHA1_HUMAN/sp|P0DOX2|IGA2_HUMAN/sp|P01877|IGHA2_HUMAN	144/246/131
JTTCQDLQIEVTVK	5 4 2 0 0	(N(N(H(H(N(H(A))))(H(N(H(A)))))))	sp|P0C0L4|CO4A_HUMAN/sp|P0C0L5|CO4B_HUMAN	1391/1391
VDKDLQSLEDILHQVEJK	5 4 1 0 0	(N(N(H(H(N(H)))(H(N(H(A)))))))	sp|P02679|FIBG_HUMAN	78
EEQFJSTFR	5 4 1 0 1	(N(F)(N(H(H(N(H)))(H(N(H(A)))))))	sp|P01859|IGHG2_HUMAN	176
VVLHPJYSQVDIGLIK	6 5 2 0 2	(N(N(H(H(N(F)(H(A))))(H(N(H)(F))(N(H(A)))))))	sp|P00738|HPT_HUMAN	241
TPLTAJITK	6 5 1 0 1	(N(N(H(H(N(H)(F)))(H(N(H(N(H(A)))))))))	sp|P0DOX2|IGA2_HUMAN/sp|P01877|IGHA2_HUMAN	320/205
YFTPJKTEDTIFLR	7 6 4 0 1	(N(N(H(H(N(H(A)))(N(H(A))))(H(N(H(A)))(N(F)(H(A)))))))	sp|P02763|A1AG1_HUMAN/sp|P19652|A1AG2_HUMAN	72/72
QJQCFYJSSYLNVQR	6 5 3 0 1	(N(N(H(H(N(F)(H(A))))(H(N(H(A)))(N(H(A)))))))	sp|P19652|A1AG2_HUMAN	88
EHEGAIYPDJTTDFQR	5 4 2 0 0	(N(N(H(H(N(H(A))))(H(N(H(A)))))))	sp|P00450|CERU_HUMAN	138
JNSDISSTR	4 3 1 0 0	(N(N(H(H)(H(N(H(A)))))))	sp|P01871|IGHM_HUMAN	46
LSLHRPALEDLLLGSEAJLTCTLTGLR	5 4 2 0 0	(N(N(H(H(N(H(A))))(H(N(H(A)))))))	sp|P01876|IGHA1_HUMAN/sp|P0DOX2|IGA2_HUMAN/sp|P01877|IGHA2_HUMAN	144/246/131
GLKFJLTETSEAEIHQSFQHLLR	7 6 4 0 0	(N(N(H(H(N(H(A)))(N(H(A))))(H(N(H(A)))(N(H(A)))))))	sp|P01011|AACT_HUMAN	106
DKICDLLVANNHFAHFFAPQJLTNMNK	5 4 2 0 0	(N(N(H(H(N(H(A))))(H(N(H(A)))))))	sp|P19827|ITIH1_HUMAN	285
KGCVLLSHLJETVTVSASLESGR	5 4 1 0 0	(N(N(H(H(N(H)))(H(N(H(A)))))))	sp|P20742|PZP_HUMAN	54
TLJQSSDELQLSMGNAMFVK	5 4 2 0 1	(N(N(H(H(N(H(A))))(H(N(F)(H(A)))))))	sp|P01011|AACT_HUMAN	127
AALAAFNAQNJGSNFQLEEISR	5 4 1 0 0	(N(N(H(H(N(H)))(H(N(H(A)))))))	sp|P02765|FETUA_HUMAN	176
VLJFTTK	5 4 2 0 0	(N(N(H(H(N(H(A))))(H(N(H(A)))))))	sp|P13671|CO6_HUMAN	324
REGDHEFLEVPEAQEDVEATFPVHQPGJYSCSYR	5 4 2 0 0	(N(N(H(H(N(H(A))))(H(N(H(A)))))))	sp|P04217|A1BG_HUMAN	179
QLAHQSJSTNIFFSPVSIATAFAMLSLGTK	6 5 3 0 1	(N(F)(N(H(H(N(H(A))))(H(N(H(A)))(N(H(A)))))))	sp|P01009|A1AT_HUMAN	70
SSVITLNTNAELFJQSDIVAH	9 2 0 0 0	(N(N(H(H(H)(H(H)))(H(H)(H(H))))))	sp|P04114|APOB_HUMAN	3358
SVQEIQATFFYFTPJKTEDTIFLR	6 5 3 0 1	(N(F)(N(H(H(N(H(A))))(H(N(H(A)))(N(H(A)))))))	sp|P02763|A1AG1_HUMAN/sp|P19652|A1AG2_HUMAN	72/72
QQQHLFGSJVTDCSGJFCLFR	6 4 2 0 0	(N(N(H(H(N(H(A))))(H(N(H(H)(A)))))))	sp|P02787|TRFE_HUMAN	630
ADTHDEILEGLNFJLTEIPEAQIHEGFQELLR	7 6 5 0 0	(N(N(H(H(N(H(A)))(N(H(A))))(H(N(H(A)))(N(H(A(A))))))))	sp|P01009|A1AT_HUMAN	107
PALEDLLLGSEAJLTCTLTGLR	6 3 1 0 0	(N(N(H(H)(H(H)(H(N(H(A))))))))	sp|P01876|IGHA1_HUMAN/sp|P0DOX2|IGA2_HUMAN/sp|P01877|IGHA2_HUMAN	144/246/131
HLVIHJESTCEQLAK	5 4 2 0 0	(N(N(H(H(N(H(A))))(H(N(H(A)))))))	sp|P01019|ANGT_HUMAN	47
LPTQJITFQTESSVAEQEAEFQSPK	6 5 3 0 2	(N(F)(N(H(H(N(F)(H(A))))(H(N(H(A)))(N(H(A)))))))	sp|Q14624|ITIH4_HUMAN	517
SSVITLNTNAELFJQSDIVAHLLSSSSSVIDALQYK	9 2 0 0 0	(N(N(H(H(H(H(H))))(H(H(H(H)))))))	sp|P04114|APOB_HUMAN	3358
GPVPTPPDNIQVQENFJISR	6 5 3 0 1	(N(N(H(H(N(F)(H(A))))(H(N(H(A)))(N(H(A)))))))	sp|P02760|AMBP_HUMAN	36
LAGKPTHVJVSVVMAEVDGTC	6 6 2 0 1	(N(F)(N(H(H(N)(N(H(A))))(H(N(H))(N(H(A)))))))	sp|P01876|IGHA1_HUMAN	340
EJGTISR	5 4 2 0 0	(N(N(H(H(N(H(A))))(H(N(H(A)))))))	sp|P02763|A1AG1_HUMAN	103
SLGNVJFTVSAEALESQELCGTEVPSVPEHGRK	5 4 1 0 0	(N(N(H(H(N(H)))(H(N(H(A)))))))	sp|P01023|A2MG_HUMAN	869
JHSCEPCQTLAVR	5 4 2 0 0	(N(N(H(H(N(H(A))))(H(N(H(A)))))))	sp|P00748|FA12_HUMAN	433
SLGNVJFTVSAEALESQELCGTEVPSVPEHGR	3 3 0 0 0	(N(N(H(H)(H(N)))))	sp|P01023|A2MG_HUMAN	869
LAGKPTHVJVSVVMAEVDGTC	5 4 2 0 1	(N(F)(N(H(H(N(H(A))))(H(N(H(A)))))))	sp|P01876|IGHA1_HUMAN	340
YLGJATAIFFLPDEGK	6 5 3 0 0	(N(N(H(H(N(H(A))))(H(N(H(A)))(N(H(A)))))))	sp|P01009|A1AT_HUMAN	271
TELFSSSCPGGIMLJETGQGYQR	5 3 1 0 0	(N(N(H(H(H))(H(N(H(A)))))))	sp|O95445|APOM_HUMAN	135
ADGTVNQIEGEATPVJLTEPAK	5 4 1 0 1	(N(F)(N(H(H(N(H)))(H(N(H(A)))))))	sp|P05090|APOD_HUMAN	98
TPLTAJITK	5 4 1 0 1	(N(F)(N(H(H(N(H)))(H(N(H(A)))))))	sp|P0DOX2|IGA2_HUMAN/sp|P01877|IGHA2_HUMAN	320/205
VVLHPJYSQVDIGLIK	6 5 3 0 0	(N(N(H(H(N(H(A))))(H(N(H(A)))(N(H(A)))))))	sp|P00738|HPT_HUMAN	241
EGDHEFLEVPEAQEDVEATFPVHQPGJYSCSYR	5 4 2 0 0	(N(N(H(H(N(H(A))))(H(N(H(A)))))))	sp|P04217|A1BG_HUMAN	179
MVSHHJLTTGATLINEQWLLTTAK	6 5 3 0 1	(N(N(H(H(N(F)(H(A))))(H(N(H(A)))(N(H(A)))))))	sp|P00739|HPTR_HUMAN/sp|P00738|HPT_HUMAN	126/184
LVPVPITJATLDQITGK	6 5 2 0 1	(N(N(H(H(N(H)(F)))(H(N(H(A)))(N(H(A)))))))	sp|P02763|A1AG1_HUMAN	33
GLTFQQJASSMCVPDQDTAIR	6 5 1 0 1	(N(N(H(H(N(H)(F)))(H(N(H(N(H(A)))))))))	sp|P0DOX6|IGM_HUMAN/sp|P01871|IGHM_HUMAN	332/209
FJSSYLQGTNQITGR	5 4 1 0 0	(N(N(H(H(N(H)))(H(N(H(A)))))))	sp|P04114|APOB_HUMAN	1523
VCQDCPLLAPLJDTR	5 4 2 0 0	(N(N(H(H(N(H(A))))(H(N(H(A)))))))	sp|P02765|FETUA_HUMAN	156
EEQFJSTFR	5 4 0 0 1	(N(F)(N(H(H(N(H)))(H(N(H))))))	sp|P01859|IGHG2_HUMAN	176
JVSCPQLEVPVCPSGFQLSCK	5 4 2 0 1	(N(F)(N(H(H(N(H(A))))(H(N(H(A)))))))	sp|P04275|VWF_HUMAN	2546
SVQEIQATFFYFTPJK	6 5 3 0 0	(N(N(H(H(N(H(A))))(H(N(H(A)))(N(H(A)))))))	sp|P02763|A1AG1_HUMAN/sp|P19652|A1AG2_HUMAN	72/72
YLGJATAIFFLPDEGKLQHLENELTHDIITK	5 4 2 0 1	(N(N(H(H(N(H(A))))(H(N(F)(H(A)))))))	sp|P01009|A1AT_HUMAN	271
VVLHPJYSQVDIGLIK	6 5 1 0 0	(N(N(H(H(N(H(A))))(H(N(H))(N(H))))))	sp|P00738|HPT_HUMAN	241
STGKPTLYJVSLVMSDTAGTCY	9 2 0 0 0	(N(N(H(H(H))(H(H(H(H(H(H)))))))))	sp|P0DOX6|IGM_HUMAN/sp|P01871|IGHM_HUMAN	563/440
JLSMPLLPADFHK	6 5 3 0 1	(N(N(H(H(N(F)(H(A))))(H(N(H(A)))(N(H(A)))))))	sp|P05546|HEP2_HUMAN	49
LAGKPTHVJVSVVMAEVDGTCY	5 5 1 0 0	(N(N(H(N)(H(N(H)))(H(N(H(A)))))))	sp|P01876|IGHA1_HUMAN	340
QLAHQSJSTNIFFSPVSIATAFAMLSLGTK	6 4 1 0 1	(N(N(H(H(H))(H(N(H)(F))(N(H(A)))))))	sp|P01009|A1AT_HUMAN	70
QLAHQSJSTNIFFSPVSIATAFAM	6 5 3 0 1	(N(N(H(H(N(F)(H(A))))(H(N(H(A)))(N(H(A)))))))	sp|P01009|A1AT_HUMAN	70
VSJQTLSLFFTVLQDVPVR	6 5 3 0 0	(N(N(H(H(N(H(A))))(H(N(H(A)))(N(H(A)))))))	sp|P01023|A2MG_HUMAN	1424
VLSJNSDANLELINTWVAK	6 5 3 0 0	(N(N(H(H(N(H(A))))(H(N(H(A)))(N(H(A)))))))	sp|P05155|IC1_HUMAN	253
QVLFLDTVYGJCSTHFTVK	8 2 0 0 0	(N(N(H(H)(H(H(H))(H(H(H)))))))	sp|P04114|APOB_HUMAN	185
FJLTETSEAEIHQSFQHLLR	6 5 3 0 0	(N(N(H(H(N(H(A))))(H(N(H(A)))(N(H(A)))))))	sp|P01011|AACT_HUMAN	106
VTACHSSQPJATLYK	5 4 2 0 0	(N(N(H(H(N(H(A))))(H(N(H(A)))))))	sp|P05543|THBG_HUMAN	36
IPCSQPPQIEHGTIJSSR	5 4 2 0 1	(N(F)(N(H(H(N(H(A))))(H(N(H(A)))))))	sp|P08603|CFAH_HUMAN	882
YTGJASALFILPDQDKMEEVEAMLLPETLK	7 6 4 0 0	(N(N(H(H(N(H(A)))(N(H(A))))(H(N(H(A)))(N(H(A)))))))	sp|P01011|AACT_HUMAN	271
JISDGFDGIPDNVDAALALPAHSYSGR	5 4 2 0 0	(N(N(H(H(N(H(A))))(H(N(H(A)))))))	sp|P04004|VTNC_HUMAN	242
GLKFJLTETSEAEIHQSFQHLLR	7 6 4 0 1	(N(N(H(H(N(H(A)))(N(H(A))))(H(N(H(A)))(N(F)(H(A)))))))	sp|P01011|AACT_HUMAN	106
JISDGFDGIPDNVDAALALPAHSYSGR	6 5 3 0 2	(N(F)(N(H(H(N(F)(H(A))))(H(N(H(A)))(N(H(A)))))))	sp|P04004|VTNC_HUMAN	242
ADTHDEILEGLNFJLTEIPEAQIHEGFQELLR	7 6 4 0 3	(N(F)(N(H(H(N(H(A)))(N(F)(H(A))))(H(N(H(A)))(N(F)(H(A)))))))	sp|P01009|A1AT_HUMAN	107
LYHFLLGAWSLJATELDPCPLSPELLGLTK	5 4 2 0 0	(N(N(H(H(N(H(A))))(H(N(H(A)))))))	sp|Q96PD5|PGRP2_HUMAN	77
LSLHRPALEDLLLGSEAJLTCTLTGLR	5 5 1 0 1	(N(N(H(N)(H(N(H)(F)))(H(N(H(A)))))))	sp|P01876|IGHA1_HUMAN/sp|P0DOX2|IGA2_HUMAN/sp|P01877|IGHA2_HUMAN	144/246/131
MVSHHJLTTGATLINEQWLLTTAK	6 5 3 0 1	(N(F)(N(H(H(N(H(A))))(H(N(H(A)))(N(H(A)))))))	sp|P00739|HPTR_HUMAN/sp|P00738|HPT_HUMAN	126/184
SPYYJVSDEISFHCYDGYTLR	5 4 2 0 0	(N(N(H(H(N(H(A))))(H(N(H(A)))))))	sp|P00751|CFAB_HUMAN	122
LAGKPTHVJVSVVMAEVDGTCY	5 5 2 0 1	(N(F)(N(H(N)(H(N(H(A))))(H(N(H(A)))))))	sp|P01876|IGHA1_HUMAN	340
IADAHLDRVEJTTVYYLVLDVQESDCSVLSR	5 4 2 0 0	(N(N(H(H(N(H(A))))(H(N(H(A)))))))	sp|P04196|HRG_HUMAN	63
EJLTAPGSDSAVFFEQGTTR	5 4 2 0 0	(N(N(H(H(N(H(A))))(H(N(H(A)))))))	sp|P00450|CERU_HUMAN	397
VLSJNSDANLELINTWVAK	5 4 2 0 0	(N(N(H(H(N(H(A))))(H(N(H(A)))))))	sp|P05155|IC1_HUMAN	253
QDQCIYJTTYLNVQR	7 6 3 0 1	(N(N(H(H(N(H)(F))(N(H(A))))(H(N(H(A)))(N(H(A)))))))	sp|P02763|A1AG1_HUMAN	93
ADGTVNQIEGEATPVJLTEPAK	5 4 2 0 0	(N(N(H(H(N(H(A))))(H(N(H(A)))))))	sp|P05090|APOD_HUMAN	98
LVPVPITJATLDQITGK	7 6 3 0 1	(N(N(H(H(N(H)(F))(N(H(A))))(H(N(H(A)))(N(H(A)))))))	sp|P02763|A1AG1_HUMAN	33
SLGNVJFTVSAEALESQELCGTEVPSVPEHGR	5 2 0 0 0	(N(N(H(H(H)(H(H))))))	sp|P01023|A2MG_HUMAN	869
YYLIQGLVJMCQSALQDKKDSYQ	4 3 1 0 0	(N(N(H(H)(H(N(H(A)))))))	sp|Q13829|BACD2_HUMAN	118
QJQCFYJSSYLNVQR	7 6 3 0 1	(N(N(H(H(N(H))(N(F)(H(A))))(H(N(H(A)))(N(H(A)))))))	sp|P19652|A1AG2_HUMAN	88
NQALJLSLAY	5 4 2 0 0	(N(N(H(H(N(H(A))))(H(N(H(A)))))))	sp|Q14624|ITIH4_HUMAN	577
LAGKPTHVJVSVVMAEVDGTC	4 5 1 0 1	(N(F)(N(H(H(N)(N))(H(N(H(A)))))))	sp|P01876|IGHA1_HUMAN	340
QVQVLQJLTTTYEIVLWQPVTADLIVK	5 4 2 0 0	(N(N(H(H(N(H(A))))(H(N(H(A)))))))	sp|Q96IY4|CBPB2_HUMAN	44
PALEDLLLGSEAJLTCTLTGLR	4 4 0 0 0	(N(N(H(H(N))(H(N(H))))))	sp|P01876|IGHA1_HUMAN/sp|P0DOX2|IGA2_HUMAN/sp|P01877|IGHA2_HUMAN	144/246/131
NPJATSSSSQDPESLQDR	7 6 4 0 1	(N(N(H(H(N(H(A)))(N(H(A))))(H(N(H(A)))(N(F)(H(A)))))))	sp|P05155|IC1_HUMAN	25
ESVTDHVNLITPLEKPLQJFTLC	5 4 2 0 0	(N(N(H(H(N(H(A))))(H(N(H(A)))))))	sp|P02743|SAMP_HUMAN	51
HJSTGCLR	5 4 2 0 0	(N(N(H(H(N(H(A))))(H(N(H(A)))))))	sp|P10909|CLUS_HUMAN	291
VYKPSAGJNSLYR	6 5 3 0 0	(N(N(H(H(N(H(A))))(H(N(H(A)))(N(H(A)))))))	sp|P02749|APOH_HUMAN	162
LDAPTNLQFVJETDSTVLVR	5 4 2 0 0	(N(N(H(H(N(H(A))))(H(N(H(A)))))))	sp|P02751|FINC_HUMAN	1007
GLTFQQJASSMCVPDQDTAIR	5 5 2 0 1	(N(F)(N(H(N)(H(N(H(A))))(H(N(H(A)))))))	sp|P0DOX6|IGM_HUMAN/sp|P01871|IGHM_HUMAN	332/209
EEQFJSTFR	6 3 1 0 1	(N(F)(N(H(H(H)(H))(H(N(H(A)))))))	sp|P01859|IGHG2_HUMAN	176
QLEEFLJQSSPFYFWMNGDRIDSLLENDR	5 4 2 0 0	(N(N(H(H(N(H(A))))(H(N(H(A)))))))	sp|P10909|CLUS_HUMAN	145
EJGTISR	7 6 4 0 0	(N(N(H(H(N(H(A)))(N(H(A))))(H(N(H(A)))(N(H(A)))))))	sp|P02763|A1AG1_HUMAN	103
VDKDLQSLEDILHQVEJK	6 4 1 0 0	(N(N(H(H(H))(H(N(H))(N(H(A)))))))	sp|P02679|FIBG_HUMAN	78
FJLTETSEAEIHQSFQHLLR	6 5 2 0 0	(N(N(H(H(N(H(A))))(H(N(H))(N(H(A)))))))	sp|P01011|AACT_HUMAN	106
VPVTLALJNTLFLIEER	5 4 2 0 0	(N(N(H(H(N(H(A))))(H(N(H(A)))))))	sp|P15144|AMPN_HUMAN	681
DIVEYYJDSJGSHVLQGR	5 4 2 0 0	(N(N(H(H(N(H(A))))(H(N(H(A)))))))	sp|P25311|ZA2G_HUMAN	109
EJGTISR	7 6 4 0 2	(N(F)(N(H(H(N(H(A)))(N(H(A))))(H(N(H(A)))(N(F)(H(A)))))))	sp|P02763|A1AG1_HUMAN	103
QSJSTNIFFSPVSIATAFAMLSLGTK	5 4 2 0 0	(N(N(H(H(N(H(A))))(H(N(H(A)))))))	sp|P01009|A1AT_HUMAN	70
TLJQSSDELQLSMGNAMFVK	7 6 2 0 0	(N(N(H(H(N(H))(N(H(A))))(H(N(H))(N(H(A)))))))	sp|P01011|AACT_HUMAN	127
SVQEIQATFFYFTPJKTEDTIFLR	6 5 3 0 0	(N(N(H(H(N(H(A))))(H(N(H(A)))(N(H(A)))))))	sp|P02763|A1AG1_HUMAN/sp|P19652|A1AG2_HUMAN	72/72
EHEGAIYPDJTTDFQR	6 5 3 0 1	(N(F)(N(H(H(N(H(A))))(H(N(H(A)))(N(H(A)))))))	sp|P00450|CERU_HUMAN	138
QDQCIYJTTYLNVQR	7 6 4 0 1	(N(N(H(H(N(H(A)))(N(H(A))))(H(N(H(A)))(N(F)(H(A)))))))	sp|P02763|A1AG1_HUMAN	93
PALEDLLLGSEAJLTCTLTGLR	5 5 1 0 0	(N(N(H(N)(H(N(H)))(H(N(H(A)))))))	sp|P01876|IGHA1_HUMAN/sp|P0DOX2|IGA2_HUMAN/sp|P01877|IGHA2_HUMAN	144/246/131
QLAHQSJSTNIFFSPVSIATAFAMLSLGTK	6 5 3 0 0	(N(N(H(H(N(H(A))))(H(N(H(A)))(N(H(A)))))))	sp|P01009|A1AT_HUMAN	70
YLGJATAIFFLPDEGKLQHLENELTHDIITK	5 4 1 0 0	(N(N(H(H(N(H)))(H(N(H(A)))))))	sp|P01009|A1AT_HUMAN	271
TLJQSSDELQLSMGNAMFVK	6 5 2 0 1	(N(N(H(H(N(H)(F)))(H(N(H(A)))(N(H(A)))))))	sp|P01011|AACT_HUMAN	127
QLAHQSJSTNIFFSPVSIATAFAMLSLGTK	5 4 2 0 2	(N(F)(N(H(H(N(H(A))))(H(N(F)(H(A)))))))	sp|P01009|A1AT_HUMAN	70
VNQNLVYESGSLJFSKLEIQSQVDSQHVGHSVLTAK	5 4 2 0 0	(N(N(H(H(N(H(A))))(H(N(H(A)))))))	sp|P04114|APOB_HUMAN	2982
SLGNVJFTVSAEALESQELCGTEVPSVPEHGR	5 2 0 0 0	(N(N(H(H(H))(H(H)))))	sp|P01023|A2MG_HUMAN	869
MVSHHJLTTGATLINEQWLLTTAK	6 4 2 0 0	(N(N(H(H(H))(H(N(H(A)))(N(H(A)))))))	sp|P00739|HPTR_HUMAN/sp|P00738|HPT_HUMAN	126/184
VSJQTLSLFFTVLQDVPVR	6 5 3 0 1	(N(N(H(H(N(F)(H(A))))(H(N(H(A)))(N(H(A)))))))	sp|P01023|A2MG_HUMAN	1424
NTGNQDSKQGEQETKJR	5 4 1 0 0	(N(N(H(H(N(H)))(H(N(H(A)))))))	sp|Q5SQI0|ATAT_HUMAN	363
EJGTISR	7 6 3 0 0	(N(N(H(H(N(H))(N(H(A))))(H(N(H(A)))(N(H(A)))))))	sp|P02763|A1AG1_HUMAN	103
FVEGSHJSTVSLTTK	5 3 1 0 0	(N(N(H(H(H))(H(N(H(A)))))))	sp|P04114|APOB_HUMAN	3411
IVGGTJSSWGEWPWQVSLQVK	5 4 2 0 0	(N(N(H(H(N(H(A))))(H(N(H(A)))))))	sp|P03952|KLKB1_HUMAN	396
HJLTTGATLINEQWLLTTAK	5 4 1 0 0	(N(N(H(H(N(H)))(H(N(H(A)))))))	sp|P00739|HPTR_HUMAN/sp|P00738|HPT_HUMAN	126/184
AALAAFNAQNJGSNFQLEEISR	5 4 2 0 1	(N(N(H(H(N(H(A))))(H(N(F)(H(A)))))))	sp|P02765|FETUA_HUMAN	176
LVPVPITJATLDR	5 4 2 0 0	(N(N(H(H(N(H(A))))(H(N(H(A)))))))	sp|P19652|A1AG2_HUMAN	33
AGLQAFFQVQECJK	5 4 2 0 0	(N(N(H(H(N(H(A))))(H(N(H(A)))))))	sp|P00450|CERU_HUMAN	358
EGDHEFLEVPEAQEDVEATFPVHQPGJYSCSYR	5 4 1 0 0	(N(N(H(H(N(H)))(H(N(H(A)))))))	sp|P04217|A1BG_HUMAN	179
SISTALAFLSLGAHJTTLTEILK	6 5 3 0 0	(N(N(H(H(N(H(A))))(H(N(H(A)))(N(H(A)))))))	sp|P01011|AACT_HUMAN	93
YTGJASALFILPDQDK	6 5 3 0 1	(N(N(H(H(N(F)(H(A))))(H(N(H(A)))(N(H(A)))))))	sp|P01011|AACT_HUMAN	271
QDQCIYJTTYLNVQR	3 3 1 0 0	(N(N(H(H(N(H(A)))))))	sp|P02763|A1AG1_HUMAN	93
NQALJLSLAY	6 5 3 0 0	(N(N(H(H(N(H(A))))(H(N(H(A)))(N(H(A)))))))	sp|Q14624|ITIH4_HUMAN	577
ADTHDEILEGLNFJLTEIPEAQIHEGFQELLR	7 6 3 0 0	(N(N(H(H(N(H))(N(H(A))))(H(N(H(A)))(N(H(A)))))))	sp|P01009|A1AT_HUMAN	107
CANLVPVPITJATLDR	6 5 3 0 1	(N(N(H(H(N(F)(H(A))))(H(N(H(A)))(N(H(A)))))))	sp|P19652|A1AG2_HUMAN	33
NCGVJCSGDVFTALIGEIASPNYPKPYPENSR	5 4 2 0 0	(N(N(H(H(N(H(A))))(H(N(H(A)))))))	sp|P09871|C1S_HUMAN	174
TLJQSSDELQLSMGNAMFVK	6 5 2 0 0	(N(N(H(H(N(H(A))))(H(N(H))(N(H(A)))))))	sp|P01011|AACT_HUMAN	127
VIDFJCTTSSVSSALANTK	5 4 2 0 0	(N(N(H(H(N(H(A))))(H(N(H(A)))))))	sp|P04196|HRG_HUMAN	125
LGJATAIFFLPDEGK	5 4 2 0 0	(N(N(H(H(N(H(A))))(H(N(H(A)))))))	sp|P01009|A1AT_HUMAN	271
QJYTRPEGGQSR	6 3 2 0 1	(N(N(H(H(H)(H))(H(N(F)(H(A(A))))))))	sp|P10071|GLI3_HUMAN	1048
KVCQDCPLLAPLJDTR	5 4 2 0 0	(N(N(H(H(N(H(A))))(H(N(H(A)))))))	sp|P02765|FETUA_HUMAN	156
QJQCFYJSSYLNVQR	7 6 4 0 0	(N(N(H(H(N(H(A)))(N(H(A))))(H(N(H(A)))(N(H(A)))))))	sp|P19652|A1AG2_HUMAN	88
EJLTAPGSDSAVFFEQGTTR	6 5 3 0 1	(N(N(H(H(N(F)(H(A))))(H(N(H(A)))(N(H(A)))))))	sp|P00450|CERU_HUMAN	397
QQQHLFGSJVTDCSGJFCLFR	5 4 1 0 0	(N(N(H(H(N(H)))(H(N(H(A)))))))	sp|P02787|TRFE_HUMAN	630
EJGTISR	6 5 3 0 2	(N(N(H(H(N(F)(H(A))))(H(N(H(A)))(N(F)(H(A)))))))	sp|P02763|A1AG1_HUMAN	103
AVJITSENLIDDVVSLIR	6 5 3 0 0	(N(N(H(H(N(H(A))))(H(N(H(A)))(N(H(A)))))))	sp|P02748|CO9_HUMAN	415
NSVLJSSTAEHSSPYSEDPIEDPLQPDVTGIR	5 4 2 0 0	(N(N(H(H(N(H(A))))(H(N(H(A)))))))	sp|P12259|FA5_HUMAN	821
QDQCIYJTTYLNVQR	7 6 2 0 1	(N(N(H(H(N(H))(N(H(A))))(H(N(H)(F))(N(H(A)))))))	sp|P02763|A1AG1_HUMAN	93
LAGKPTHVJVSVVMAEVDGTCY	5 4 1 0 0	(N(N(H(H(N(H)))(H(N(H(A)))))))	sp|P01876|IGHA1_HUMAN	340
SLGNVJFTVSAEALESQELCGTEVPSVPEHGR	5 4 1 0 0	(N(N(H(H(N(H)))(H(N(H(A)))))))	sp|P01023|A2MG_HUMAN	869
GHVJITR	5 4 2 0 0	(N(N(H(H(N(H(A))))(H(N(H(A)))))))	sp|P00734|THRB_HUMAN	121
NLFLJHSEJATAK	5 4 2 0 0	(N(N(H(H(N(H(A))))(H(N(H(A)))))))	sp|P00739|HPTR_HUMAN/sp|P00738|HPT_HUMAN	149/207
QDQCIYJTTYLNVQR	7 6 4 0 1	(N(F)(N(H(H(N(H(A(N(H(A)))))))(H(N(H(A(N(H(A))))))))))	sp|P02763|A1AG1_HUMAN	93
SVQEIQATFFYFTPJKTEDTIFLR	8 7 3 0 0	(N(N(H(H(N(H))(N(H(A))))(H(N(H(A)))(N(H(N(H(A)))))))))	sp|P02763|A1AG1_HUMAN/sp|P19652|A1AG2_HUMAN	72/72
VIDFJCTTSSVSSALANTK	5 4 1 0 0	(N(N(H(H(N(H)))(H(N(H(A)))))))	sp|P04196|HRG_HUMAN	125
MLJTSSLLEQLNEQFNWVSR	6 5 2 0 0	(N(N(H(H(N(H(A))))(H(N(H))(N(H(A)))))))	sp|P10909|CLUS_HUMAN	354
LVPVPITJATLDQITGK	4 3 1 0 0	(N(N(H(H)(H(N(H(A)))))))	sp|P02763|A1AG1_HUMAN	33
QJQCFYJSSYLNVQR	7 6 4 0 1	(N(N(H(H(N(H(A)))(N(H(A))))(H(N(H(A)))(N(F)(H(A)))))))	sp|P19652|A1AG2_HUMAN	93
EJLTAPGSDSAVFFEQGTTR	5 4 2 0 1	(N(N(H(H(N(H(A))))(H(N(F)(H(A)))))))	sp|P00450|CERU_HUMAN	397
DVQIIVFPEDGIHGFJFTR	5 4 2 0 0	(N(N(H(H(N(H(A))))(H(N(H(A)))))))	sp|P43251|BTD_HUMAN	119
SVQEIQATFFYFTPJKTEDTIFLR	5 4 3 0 3	(N(F)(N(H(H(N(F)(H(A))))(H(N(F)(H(A(A))))))))	sp|P02763|A1AG1_HUMAN/sp|P19652|A1AG2_HUMAN	72/72
QSVPAHFVALJGSK	6 2 0 0 0	(N(N(H(H)(H(H)(H(H))))))	sp|P06681|CO2_HUMAN	621
ELHHLQEQJVSNAFLDK	5 4 2 0 0	(N(N(H(H(N(H(A))))(H(N(H(A)))))))	sp|P00450|CERU_HUMAN	762
PALEDLLLGSEAJLTCTLTGLR	3 5 0 0 0	(N(N(H(H(N))(H(N)(N)))))	sp|P01876|IGHA1_HUMAN/sp|P0DOX2|IGA2_HUMAN/sp|P01877|IGHA2_HUMAN	144/246/131
VLSJNSDANLELINTWVAK	6 5 3 0 2	(N(F)(N(H(H(N(F)(H(A))))(H(N(H(A)))(N(H(A)))))))	sp|P05155|IC1_HUMAN	253
YFTPJKTEDTIFLR	7 6 4 0 0	(N(N(H(H(N(H(A)))(N(H(A))))(H(N(H(A)))(N(H(A)))))))	sp|P02763|A1AG1_HUMAN/sp|P19652|A1AG2_HUMAN	72/72
SIVQTJCSKENFLFLTPDCK	6 5 3 0 0	(N(N(H(H(N(H(A))))(H(N(H(A)))(N(H(A)))))))	sp|P01042|KNG1_HUMAN	205
EJGTISR	6 5 3 0 0	(N(N(H(H(N(H(A))))(H(N(H(A)))(N(H(A)))))))	sp|P02763|A1AG1_HUMAN	103
EEQYJSTYR	5 5 0 0 1	(N(F)(N(H(N)(H(N(H)))(H(N(H))))))	sp|P0DOX5|IGG1_HUMAN/sp|P01857|IGHG1_HUMAN	299/180
TPLTAJITK	4 5 0 0 1	(N(F)(N(H(N)(H(N(H))(N(H))))))	sp|P0DOX2|IGA2_HUMAN/sp|P01877|IGHA2_HUMAN	320/205
VTQVYAEJGTVLQGSTVASVYK	6 5 3 0 0	(N(N(H(H(N(H(A))))(H(N(H(A)))(N(H(A)))))))	sp|P27169|PON1_HUMAN	324
ISEEJETTCYMGK	5 4 2 0 0	(N(N(H(H(N(H(A))))(H(N(H(A)))))))	sp|P08603|CFAH_HUMAN	911
LPTQJITFQTESSVAEQEAEFQSPK	5 4 1 0 0	(N(N(H(H(N(H)))(H(N(H(A)))))))	sp|Q14624|ITIH4_HUMAN	517
ALPQPQJVTSLLGCTH	5 4 2 0 1	(N(N(H(H(N(H(A))))(H(N(F)(H(A)))))))	sp|P02790|HEMO_HUMAN	453
QVFPGLJYCTSGAYSJASSTDSASYYPLTGDTR	5 4 1 0 0	(N(N(H(H)(H(N(H))(N(H(A)))))))	sp|P04114|APOB_HUMAN	974
SLGNVJFTVSAEALESQELCGTEVPSVPEHGR	5 4 1 0 0	(N(N(H(H(H))(H(N)(N(H(A)))))))	sp|P01023|A2MG_HUMAN	869
GTGJDTVLNVALLNVISNQECNIK	5 4 2 0 1	(N(F)(N(H(H(N(H(A))))(H(N(H(A)))))))	sp|Q2TV78|MST1L_HUMAN/sp|P26927|HGFL_HUMAN	619/615
RNPPMGGNVVIFDTVITNQEEPYQJHSGR	5 4 1 0 1	(N(F)(N(H(H(N(H)))(H(N(H(A)))))))	sp|P02745|C1QA_HUMAN	146
ADTHDEILEGLNFJLTEIPEAQIHEGFQELLR	5 4 1 0 2	(N(N(H(H(N(H)(F)))(H(N(F)(H(A)))))))	sp|P01009|A1AT_HUMAN	107
SVQEIQATFFYFTPJKTEDTIFLR	7 6 3 0 1	(N(N(H(H(N(H))(N(F)(H(A))))(H(N(H(A)))(N(H(A)))))))	sp|P02763|A1AG1_HUMAN/sp|P19652|A1AG2_HUMAN	72/72
EEQFJSTFR	4 4 0 0 1	(N(F)(N(H(H(N))(H(N(H))))))	sp|P01859|IGHG2_HUMAN	176
EEQYJSTYR	5 4 1 0 0	(N(N(H(H(N(H)))(H(N(H(A)))))))	sp|P0DOX5|IGG1_HUMAN/sp|P01857|IGHG1_HUMAN	299/180
VVLHPJYSQVDIGLIK	7 6 3 0 2	(N(N(H(H(N(H)(F))(N(H(A))))(H(N(H(A)))(N(F)(H(A)))))))	sp|P00738|HPT_HUMAN	241
ICDLLVANNHFAHFFAPQJLTNMNK	5 4 2 0 0	(N(N(H(H(N(H(A))))(H(N(H(A)))))))	sp|P19827|ITIH1_HUMAN	285
VSJQTLSLFFTVLQDVPVR	6 5 3 0 1	(N(F)(N(H(H(N(H(A))))(H(N(H(A)))(N(H(A)))))))	sp|P01023|A2MG_HUMAN	1424
JISDGFDGIPDNVDAALALPAHSYSGR	5 4 2 0 1	(N(N(H(H(N(H(A))))(H(N(F)(H(A)))))))	sp|P04004|VTNC_HUMAN	242
TPLTAJITK	5 5 0 0 1	(N(F)(N(H(N)(H(N(H)))(H(N(H))))))	sp|P0DOX2|IGA2_HUMAN/sp|P01877|IGHA2_HUMAN	320/205
GLTFQQJASSMCVPDQDTAIR	5 4 1 0 1	(N(N(H(H(N(H)(F)))(H(N(H(A)))))))	sp|P0DOX6|IGM_HUMAN/sp|P01871|IGHM_HUMAN	332/209
CANLVPVPITJATLDR	6 5 3 0 0	(N(N(H(H(N(H(A))))(H(N(H(A)))(N(H(A)))))))	sp|P19652|A1AG2_HUMAN	33
KAFITJFSMIIDGMTYPGIIK	5 4 2 0 0	(N(N(H(H(N(H(A))))(H(N(H(A)))))))	sp|Q14624|ITIH4_HUMAN	81
QLVDALTTWQJK	5 4 2 0 0	(N(N(H(H(N(H(A))))(H(N(H(A)))))))	sp|Q14624|ITIH4_HUMAN	207
MVSHHJLTTGATLINEQWLLTTAK	5 4 2 0 0	(N(N(H(H)(H(N(H(A)))(N(H(A)))))))	sp|P00739|HPTR_HUMAN/sp|P00738|HPT_HUMAN	126/184
QQQHLFGSJVTDCSGJFCLFR	5 4 2 0 1	(N(N(H(H(N(H(A))))(H(N(F)(H(A)))))))	sp|P02787|TRFE_HUMAN	630
MGSJLSPQLCLM	5 4 1 0 2	(N(N(H(H(N(H)(F)))(H(N(F)(H(A)))))))	sp|P00751|CFAB_HUMAN	4
ALMDGASQLMGEJR	5 4 2 0 0	(N(N(H(H(N(H(A))))(H(N(H(A)))))))	sp|P02675|FIBB_HUMAN	394
QDQCIYJTTYLNVQR	6 5 2 0 1	(N(N(H(H(N(H)(F)))(H(N(H(A)))(N(H(A)))))))	sp|P02763|A1AG1_HUMAN	93
SVLLADVEDLIQQQISJDTVSPR	5 4 2 0 0	(N(N(H(H(N(H(A))))(H(N(H(A)))))))	sp|Q96IY4|CBPB2_HUMAN	108
YNSQJQSNNQFVLYR	5 4 2 0 0	(N(N(H(H(N(H(A))))(H(N(H(A)))))))	sp|P01042|KNG1_HUMAN	48
GLTFQQJASSMCVPDQDTAIR	5 5 1 0 1	(N(N(H(H(N(H(A))))(H(N(H))(N(F))))))	sp|P0DOX6|IGM_HUMAN/sp|P01871|IGHM_HUMAN	332/209
FEVDSPVYJATWSASLK	5 4 1 0 0	(N(N(H(H(N(H)))(H(N(H(A)))))))	sp|P04114|APOB_HUMAN	3895
VIDFJCTTSSVSSALANTK	5 2 0 0 0	(N(N(H(H)(H(H(H))))))	sp|P04196|HRG_HUMAN	125
SVQEIQATFFYFTPJK	7 6 3 0 0	(N(N(H(H(N(H))(N(H(A))))(H(N(H(A)))(N(H(A)))))))	sp|P02763|A1AG1_HUMAN/sp|P19652|A1AG2_HUMAN	72/72
QLAHQSJSTNIFFSPVSIATAFAMLSLGTK	6 5 3 0 1	(N(N(H(H(N(F)(H(A))))(H(N(H(A)))(N(H(A)))))))	sp|P01009|A1AT_HUMAN	70
QSVPAHFVALJGSK	5 2 0 0 0	(N(N(H(H)(H(H(H))))))	sp|P06681|CO2_HUMAN	621
AQLLQGLGFJLTER	6 5 3 0 1	(N(N(H(H(N(F)(H(A))))(H(N(H(A)))(N(H(A)))))))	sp|P08185|CBG_HUMAN	96
SWPAVGJCSSALR	5 4 2 0 0	(N(N(H(H(N(H(A))))(H(N(H(A)))))))	sp|P02790|HEMO_HUMAN	187
AFTQSSJLTVHQKIHS	5 4 2 0 0	(N(N(H(H(N(H(A))))(H(N(H(A)))))))	sp|P13682|ZNF35_HUMAN	292
JNSDISSTR	5 5 1 0 1	(N(F)(N(H(N)(H(N(H)))(H(N(H(A)))))))	sp|P01871|IGHM_HUMAN	46
GHVJITR	5 4 1 0 0	(N(N(H(H(N(H)))(H(N(H(A)))))))	sp|P00734|THRB_HUMAN	121
LVPVPITJATLDQITGK	5 4 2 0 1	(N(N(H(H(N(H(A))))(H(N(F)(H(A)))))))	sp|P02763|A1AG1_HUMAN	33
STGKPTLYJVSLVMSDTAGTC	7 2 0 0 0	(N(N(H(H)(H(H(H))(H(H))))))	sp|P0DOX6|IGM_HUMAN/sp|P01871|IGHM_HUMAN	563/440
VVLHPJYSQVDIGLIK	7 6 3 0 0	(N(N(H(H(N(H))(N(H(A))))(H(N(H(A)))(N(H(A)))))))	sp|P00738|HPT_HUMAN	241
SWPAVGJCSSALR	5 4 2 0 1	(N(F)(N(H(H(N(H(A))))(H(N(H(A)))))))	sp|P02790|HEMO_HUMAN	187
LVPVPITJATLDR	7 6 2 0 1	(N(N(H(H(N(H))(N(H(A))))(H(N(H)(F))(N(H(A)))))))	sp|P19652|A1AG2_HUMAN	33
ELHHLQEQJVSNAFLDKGEFYIGSK	6 5 3 0 0	(N(N(H(H(N(H(A))))(H(N(H(A)))(N(H(A)))))))	sp|P00450|CERU_HUMAN	762
QVFPGLJYCTSGAYSJASSTDSASYYPLTGDTR	5 4 1 0 0	(N(N(H(H(N(H)))(H(N(H(A)))))))	sp|P04114|APOB_HUMAN	974
LAGKPTHVJVSVVMAEVDGTC	4 5 0 0 1	(N(F)(N(H(N)(H(N(H))(N(H))))))	sp|P01876|IGHA1_HUMAN	340
VSJQTLSLFFTVLQDVPVR	5 4 2 0 1	(N(F)(N(H(H(N(H(A))))(H(N(H(A)))))))	sp|P01023|A2MG_HUMAN	1424
LAGKPTHVJVSVVMAEVDGTC	6 5 1 0 1	(N(F)(N(H(H(N(H(A))))(H(N(H))(N(H))))))	sp|P01876|IGHA1_HUMAN	340
PALEDLLLGSEAJLTCTLTGLR	4 5 1 0 0	(N(N(H(N)(H(N(H))(N(H(A)))))))	sp|P01876|IGHA1_HUMAN/sp|P0DOX2|IGA2_HUMAN/sp|P01877|IGHA2_HUMAN	144/246/131
YKJNSDISSTR	4 3 1 0 1	(N(F)(N(H(H)(H(N(H(A)))))))	sp|P01871|IGHM_HUMAN	46
QDQCIYJTTYLNVQR	6 5 2 0 1	(N(N(H(H(N(F)(H(A))))(H(N(H))(N(H(A)))))))	sp|P02763|A1AG1_HUMAN	93
KDINLDSIIVDHQJDSFR	5 4 1 0 0	(N(N(H(H(N(H)))(H(N(H(A)))))))	sp|Q7L1T6|NB5R4_HUMAN	201
NVIFSPLSISTALAFLSLGAHJTTLTEILK	5 4 2 0 1	(N(F)(N(H(H(N(H(A))))(H(N(H(A)))))))	sp|P01011|AACT_HUMAN	93
VVLHPJYSQVDIGLIK	7 6 2 0 1	(N(N(H(H(N(H))(N(H)(F)))(H(N(H(A)))(N(H(A)))))))	sp|P00738|HPT_HUMAN	241
LPQPQJVTSLLGCTH	5 6 1 0 0	(N(N(H(H(N)(N))(H(N(H))(N(H(A)))))))	sp|P02790|HEMO_HUMAN	453
EJLTAPGSDSAVFFEQGTTR	6 5 2 0 1	(N(N(H(H(N(H)(F)))(H(N(H(A)))(N(H(A)))))))	sp|P00450|CERU_HUMAN	397
EJGTISR	7 6 4 0 1	(N(F)(N(H(H(N(H(A(N(H(A)))))))(H(N(H(A(N(H(A))))))))))	sp|P02763|A1AG1_HUMAN	103
AEMLJVSK	5 4 2 0 0	(N(N(H(H(N(H(A))))(H(N(H(A)))))))	sp|B5MCY1|TDR15_HUMAN	1535
GLKFJLTETSEAEIHQSFQHLLR	7 6 3 0 1	(N(N(H(H(N(H)(F))(N(H(A))))(H(N(H(A)))(N(H(A)))))))	sp|P01011|AACT_HUMAN	106
EMGPHVPJVTSLCLQY	6 3 2 0 1	(N(N(H(H(H)(H))(H(N(F)(H(A(A))))))))	sp|O75155|CAND2_HUMAN	299
NEEYJK	6 5 2 0 0	(N(N(H(H(N(H(A))))(H(N(H))(N(H(A)))))))	sp|P02763|A1AG1_HUMAN/sp|P19652|A1AG2_HUMAN	56/56
NLFLJHSEJATAK	5 4 1 0 0	(N(N(H(H(N(H)))(H(N(H(A)))))))	sp|P00739|HPTR_HUMAN/sp|P00738|HPT_HUMAN	149/207
EDALJETR	6 5 3 0 0	(N(N(H(H(N(H(A))))(H(N(H(A)))(N(H(A)))))))	sp|P10909|CLUS_HUMAN	86
LSLHRPALEDLLLGSEAJLTCTLTGLR	4 5 1 0 0	(N(N(H(N)(H(N(H))(N(H(A)))))))	sp|P01876|IGHA1_HUMAN/sp|P0DOX2|IGA2_HUMAN/sp|P01877|IGHA2_HUMAN	144/246/131
SVQEIQATFFYFTPJKTEDTIFLR	6 5 2 0 3	(N(N(H(N)(H(N(F)(H(H))))(H(N(F)(H(F)(A(A))))))))	sp|P02763|A1AG1_HUMAN/sp|P19652|A1AG2_HUMAN	72/72
SLGNVJFTVSAEALESQELCGTEVPSVPEHGR	3 6 0 0 0	(N(N(H(H(N)(N))(H(N)(N)))))	sp|P01023|A2MG_HUMAN	869
YLETLKTLKDVLJDSENK	4 3 0 0 0	(N(N(H(H(H))(H(N)))))	sp|P46939|UTRO_HUMAN	924
ELPGVCJETMMALWEECKPCLK	6 5 3 0 0	(N(N(H(H(N(H(A))))(H(N(H(A)))(N(H(A)))))))	sp|P10909|CLUS_HUMAN	103
GHVJITR	5 4 2 0 1	(N(N(H(H(N(H(A))))(H(N(F)(H(A)))))))	sp|P00734|THRB_HUMAN	121
PWQAKMVSHHJLTTGATLINEQWLLTTAK	6 5 2 0 0	(N(N(H(N)(H(H))(H(N(H(A)))(N(H(A)))))))	sp|P00739|HPTR_HUMAN/sp|P00738|HPT_HUMAN	126/184
FTPJKTEDTIFLR	6 5 3 0 1	(N(N(H(H(N(F)(H(A))))(H(N(H(A)))(N(H(A)))))))	sp|P02763|A1AG1_HUMAN/sp|P19652|A1AG2_HUMAN	72/72
GLKFJLTETSEAEIHQSFQHLLR	7 6 3 0 2	(N(N(H(H(N(H)(F))(N(H(A))))(H(N(H(A)))(N(F)(H(A)))))))	sp|P01011|AACT_HUMAN	106
QDQCIYJTTYLNVQR	7 4 3 0 2	(N(F)(N(H(H(H)(H))(H(N(H(A(A))))(N(F)(H(A)))))))	sp|P02763|A1AG1_HUMAN	93
VPGJVTAVLGETLK	5 4 2 0 0	(N(N(H(H(N(H(A))))(H(N(H(A)))))))	sp|P01833|PIGR_HUMAN	469
QLAHQSJSTNIFFSPVSIATAF	5 4 2 0 0	(N(N(H(H(N(H(A))))(H(N(H(A)))))))	sp|P01009|A1AT_HUMAN	70
GCVLLSYLJETVTVSASLESVR	6 5 2 0 0	(N(N(H(H(N(H(A))))(H(N(H))(N(H(A)))))))	sp|P01023|A2MG_HUMAN	55
VVLHPJYSQVDIGLIK	6 5 2 0 1	(N(N(H(H(N(F)(H(A))))(H(N(H))(N(H(A)))))))	sp|P00738|HPT_HUMAN	241
RNPPMGGNVVIFDTVITNQEEPYQJHSGR	5 4 1 0 0	(N(N(H(H(N(H)))(H(N(H(A)))))))	sp|P02745|C1QA_HUMAN	146
VGQLQLSHJLSLVILVPQ	5 4 2 0 0	(N(N(H(H(N(H(A))))(H(N(H(A)))))))	sp|P05155|IC1_HUMAN	352
QJQCFYJSSYLNVQR	7 6 3 0 1	(N(N(H(H(N(H)(F))(N(H(A))))(H(N(H(A)))(N(H(A)))))))	sp|P19652|A1AG2_HUMAN	88
PALEDLLLGSEAJLTCTLTGLR	4 5 1 0 0	(N(N(H(H(N)(N))(H(N(H(A)))))))	sp|P01876|IGHA1_HUMAN/sp|P0DOX2|IGA2_HUMAN/sp|P01877|IGHA2_HUMAN	144/246/131
QLAHQSJSTNIFFSPVSIATAFAMLSLGTK	6 5 1 0 0	(N(N(H(H(N(H(A))))(H(N(H))(N(H))))))	sp|P01009|A1AT_HUMAN	70
SPYEMFGDEEVMCLNGJWTEPPQCK	5 4 2 0 0	(N(N(H(H(N(H(A))))(H(N(H(A)))))))	sp|Q03591|FHR1_HUMAN/sp|P08603|CFAH_HUMAN	194/1095
YTGJASALFILPDQDKMEEVEAMLLPETLKR	6 5 3 0 1	(N(N(H(H(N(F)(H(A))))(H(N(H(A)))(N(H(A)))))))	sp|P01011|AACT_HUMAN	271
GCVLLSYLJETVTVSASLESVR	5 4 2 0 1	(N(F)(N(H(H)(H(N(H(A)))(N(H(A)))))))	sp|P01023|A2MG_HUMAN	55
CGLVPVLAENYJK	5 4 2 0 0	(N(N(H(H(N(H(A))))(H(N(H(A)))))))	sp|P02787|TRFE_HUMAN	432
QDQCIYJTTYLNVQR	7 6 3 0 2	(N(N(H(H(N(H)(F))(N(H(A))))(H(N(H(A)))(N(F)(H(A)))))))	sp|P02763|A1AG1_HUMAN	93
ADTHDEILEGLNFJLTEIPEAQIHEGFQELLR	6 5 4 0 0	(N(N(H(H(N(H(A))))(H(N(H(A)))(N(H(A)(A)))))))	sp|P01009|A1AT_HUMAN	107
ADTHDEILEGLNFJLTEIPEAQIHEGFQELLR	6 5 2 0 2	(N(N(H(H(N(F)(H(A))))(H(N(H)(F))(N(H(A)))))))	sp|P01009|A1AT_HUMAN	107
VVLHPJYSQVDIGLIK	6 5 3 0 1	(N(N(H(H(N(F)(H(A))))(H(N(H(A)))(N(H(A)))))))	sp|P00738|HPT_HUMAN	241
ELHHLQEQJVSNAFLDKGEFYIGSK	6 5 3 0 1	(N(F)(N(H(H(N(H(A))))(H(N(H(A)))(N(H(A)))))))	sp|P00450|CERU_HUMAN	762
LSDLSIJSTECLHVHCR	5 4 2 0 0	(N(N(H(H(N(H(A))))(H(N(H(A)))))))	sp|P05156|CFAI_HUMAN	177
DIVEYYJDSJGSHVLQGR	6 5 3 0 0	(N(N(H(H(N(H(A))))(H(N(H(A)))(N(H(A)))))))	sp|P25311|ZA2G_HUMAN	109
NEEYJK	6 5 3 0 1	(N(N(H(H(N(F)(H(A))))(H(N(H(A)))(N(H(A)))))))	sp|P02763|A1AG1_HUMAN/sp|P19652|A1AG2_HUMAN	56/56
EHEGAIYPDJTTDFQR	6 5 3 0 0	(N(N(H(H(N(H(A))))(H(N(H(A)))(N(H(A)))))))	sp|P00450|CERU_HUMAN	138
SVQEIQATFFYFTPJKTEDTIFLR	4 3 1 0 0	(N(N(H(H)(H(N(H(A)))))))	sp|P02763|A1AG1_HUMAN/sp|P19652|A1AG2_HUMAN	72/72
QLAHQSJSTNIFFSPVSIATAF	6 5 3 0 0	(N(N(H(H(N(H(A))))(H(N(H(A)))(N(H(A)))))))	sp|P01009|A1AT_HUMAN	70
TPLTAJITK	4 5 1 0 1	(N(F)(N(H(N)(H(N(H))(N(H(A)))))))	sp|P0DOX2|IGA2_HUMAN/sp|P01877|IGHA2_HUMAN	320/205
ELNLILKJSSFQSMKENK	4 3 0 0 0	(N(N(H(H)(H(N(H))))))	sp|Q06520|ST2A1_HUMAN	217
EJGTVSR	7 6 4 0 1	(N(N(H(H(N(H(A)))(N(H(A))))(H(N(H(A)))(N(F)(H(A)))))))	sp|P19652|A1AG2_HUMAN	103
QLHVEHDGESCSJSSHQQILETGEGSPSLK	6 5 3 0 0	(N(N(H(H(N(H(A))))(H(N(H(A)))(N(H(A)))))))	sp|P29622|KAIN_HUMAN	33
QIPLCANLVPVPITJATLDR	5 4 2 0 0	(N(N(H(H(N(H(A))))(H(N(H(A)))))))	sp|P19652|A1AG2_HUMAN	33
QQQHLFGSJVTDCSGJFCLFR	6 5 3 0 1	(N(N(H(H(N(F)(H(A))))(H(N(H(A)))(N(H(A)))))))	sp|P02787|TRFE_HUMAN	630
SISTALAFLSLGAHJTTLTEILK	5 4 2 0 0	(N(N(H(H(N(H(A))))(H(N(H(A)))))))	sp|P01011|AACT_HUMAN	93
VDKDLQSLEDILHQVEJK	5 4 0 0 0	(N(N(H(H(N(H)))(H(N(H))))))	sp|P02679|FIBG_HUMAN	78
EJGTISR	7 6 4 0 1	(N(N(H(H(N(H(A)))(N(H(A))))(H(N(H(A)))(N(F)(H(A)))))))	sp|P02763|A1AG1_HUMAN	103
IYPGVDFGGEELJVTFVK	5 4 2 0 0	(N(N(H(H(N(H(A))))(H(N(H(A)))))))	sp|P03952|KLKB1_HUMAN	308
ITJFSMIIDGMTYPGIIK	5 4 2 0 0	(N(N(H(H(N(H(A))))(H(N(H(A)))))))	sp|Q14624|ITIH4_HUMAN	81
VSJQTLSLFFTVLQDVPVR	5 4 2 0 0	(N(N(H(H)(H(N(H(A)))(N(H(A)))))))	sp|P01023|A2MG_HUMAN	1424
AALAAFNAQNJGSNFQLEEISR	6 5 3 0 2	(N(N(H(H(N(F)(H(A))))(H(N(H(A)))(N(F)(H(A)))))))	sp|P02765|FETUA_HUMAN	176
VVLHPJYSQVDIGLIK	7 6 2 0 0	(N(N(H(H(N(H))(N(H(A))))(H(N(H))(N(H(A)))))))	sp|P00738|HPT_HUMAN	241
HGIQYFNJNTQHSSLFMLNEVK	5 4 2 0 0	(N(N(H(H(N(H(A))))(H(N(H(A)))))))	sp|P01042|KNG1_HUMAN	169
ANLVPVPITJATLDQITGK	6 5 3 0 1	(N(N(H(H(N(F)(H(A))))(H(N(H(A)))(N(H(A)))))))	sp|P02763|A1AG1_HUMAN	33
VYKPSAGJNSLYR	6 5 3 0 1	(N(F)(N(H(H(N(H(A))))(H(N(H(A)))(N(H(A)))))))	sp|P02749|APOH_HUMAN	162
DTFVJASR	5 4 1 0 1	(N(F)(N(H(H(N(H)))(H(N(H(A)))))))	sp|P05155|IC1_HUMAN	238
GLJVTLSSTGR	5 4 2 0 0	(N(N(H(H(N(H(A))))(H(N(H(A)))))))	sp|P0C0L4|CO4A_HUMAN/sp|P0C0L5|CO4B_HUMAN	1328/1328
LVPVPITJATLDR	6 5 3 0 1	(N(F)(N(H(H(N(H(A))))(H(N(H(A)))(N(H(A)))))))	sp|P19652|A1AG2_HUMAN	33
LGACJDTLQQLMEVFKFDTISEK	5 4 2 0 0	(N(N(H(H(N(H(A))))(H(N(H(A)))))))	sp|P01008|ANT3_HUMAN	128
SISTALAFLSLGAHJTTLTEILK	5 4 2 0 1	(N(F)(N(H(H(N(H(A))))(H(N(H(A)))))))	sp|P01011|AACT_HUMAN	93
YLGJATAIFFLPDEGK	6 5 3 0 1	(N(N(H(H(N(F)(H(A))))(H(N(H(A)))(N(H(A)))))))	sp|P01009|A1AT_HUMAN	271
LSLHRPALEDLLLGSEAJLTCTLTGLR	5 5 0 0 0	(N(N(H(H(N(H)))(H(N)(N(H))))))	sp|P01876|IGHA1_HUMAN/sp|P0DOX2|IGA2_HUMAN/sp|P01877|IGHA2_HUMAN	144/246/131
QJMCQIGSSNR	4 4 2 0 3	(N(F)(N(H(H(N(F)(H(A)))(N(F)(H(A)))))))	sp|P35555|FBN1_HUMAN	2346
KVCQDCPLLAPLJDTR	5 4 1 0 0	(N(N(H(H(N(H)))(H(N(H(A)))))))	sp|P02765|FETUA_HUMAN	156
LAGKPTHVJVSVVMAEVDGTC	5 4 1 0 1	(N(F)(N(H(H(N(H)))(H(N(H(A)))))))	sp|P01876|IGHA1_HUMAN	340
LEPVHLQLQCMSQEQLAQVAAJATK	5 4 2 0 0	(N(N(H(H(N(H(A))))(H(N(H(A)))))))	sp|Q96PD5|PGRP2_HUMAN	367
QLAHQSJSTNIFFSPVSIATAFAML	5 4 2 0 1	(N(F)(N(H(H(N(H(A))))(H(N(H(A)))))))	sp|P01009|A1AT_HUMAN	70
FSLLGHASISCTVEJETIGVWRPSPPTCEK	5 4 2 0 0	(N(N(H(H(N(H(A))))(H(N(H(A)))))))	sp|P04003|C4BPA_HUMAN	221
LQAPLJYTEFQKPICLPSK	6 5 3 0 0	(N(N(H(H(N(H(A))))(H(N(H(A)))(N(H(A)))))))	sp|P03952|KLKB1_HUMAN	494
VDKDLQSLEDILHQVEJK	5 4 1 0 1	(N(F)(N(H(H(N(H)))(H(N(H(A)))))))	sp|P02679|FIBG_HUMAN	78
LAGKPTHVJVSVVMAEVDGTCY	5 4 2 0 1	(N(F)(N(H(H(N(H(A))))(H(N(H(A)))))))	sp|P01876|IGHA1_HUMAN	340
GPDVLTATVSGKLPTQJITFQTESSVAEQEAEFQSPK	5 4 2 0 0	(N(N(H(H(N(H(A))))(H(N(H(A)))))))	sp|Q14624|ITIH4_HUMAN	517
KYLGJATAIFFLPDEGK	5 4 2 0 0	(N(N(H(H(N(H(A))))(H(N(H(A)))))))	sp|P01009|A1AT_HUMAN	271
EJGTISR	6 5 3 0 1	(N(N(H(H(N(F)(H(A))))(H(N(H(A)))(N(H(A)))))))	sp|P02763|A1AG1_HUMAN	103
TLYETEVFSTDFSJISAAK	6 5 3 0 0	(N(N(H(H(N(H(A))))(H(N(H(A)))(N(H(A)))))))	sp|P05543|THBG_HUMAN	165
VSJQTLSLFFTVLQDVPVR	6 5 1 0 1	(N(F)(N(H(H(N(H(A))))(H(N(H))(N(H))))))	sp|P01023|A2MG_HUMAN	1424
SLGNVJFTVSAEALESQELCGTEVPSVPEHGR	6 3 1 0 0	(N(N(H(H)(H(H)(H(N(H(A))))))))	sp|P01023|A2MG_HUMAN	869
LVPVPITJATLDR	7 6 3 0 1	(N(N(H(H(N(H)(F))(N(H(A))))(H(N(H(A)))(N(H(A)))))))	sp|P19652|A1AG2_HUMAN	33
CLLYPPWDKJFTENDLLVR	5 4 2 0 0	(N(N(H(H(N(H(A))))(H(N(H(A)))))))	sp|P00734|THRB_HUMAN	416
ADTHDEILEGLNFJLTEIPEAQIHEGFQELLR	5 4 2 0 1	(N(N(H(H(N(H(A))))(H(N(F)(H(A)))))))	sp|P01009|A1AT_HUMAN	107
YKJNSDISSTR	5 4 1 0 1	(N(F)(N(H(H(N(H)))(H(N(H(A)))))))	sp|P01871|IGHM_HUMAN	46
GLJVTLSSTGR	5 4 1 0 0	(N(N(H(H(N(H)))(H(N(H(A)))))))	sp|P0C0L4|CO4A_HUMAN/sp|P0C0L5|CO4B_HUMAN	1328/1328
ADTHDEILEGLNFJLTEIPEAQIHEGFQELLR	7 6 4 0 2	(N(N(H(H(N(H(A)))(N(F)(H(A))))(H(N(H(A)))(N(F)(H(A)))))))	sp|P01009|A1AT_HUMAN	107
EJGTVSR	7 6 4 0 2	(N(N(H(H(N(H(A)))(N(F)(H(A))))(H(N(H(A)))(N(F)(H(A)))))))	sp|P19652|A1AG2_HUMAN	103
QLAHQSJSTNIFFSPVSIATAFAM	5 4 2 0 0	(N(N(H(H(N(H(A))))(H(N(H(A)))))))	sp|P01009|A1AT_HUMAN	70
AFITJFSMIIDGMTYPGIIK	5 4 1 0 0	(N(N(H(H(N(H)))(H(N(H(A)))))))	sp|Q14624|ITIH4_HUMAN	81
LFQPJDTCIVSGWGR	5 4 2 0 0	(N(N(H(H(N(H(A))))(H(N(H(A)))))))	sp|P05156|CFAI_HUMAN	464
SLGNVJFTVSAEALESQELCGTEVPSVPEHGRK	4 3 1 0 0	(N(N(H(H)(H(N(H(A)))))))	sp|P01023|A2MG_HUMAN	869
LSLHRPALEDLLLGSEAJLTCTLTGLR	5 5 0 0 0	(N(N(H(N)(H(N(H)))(H(N(H))))))	sp|P01876|IGHA1_HUMAN/sp|P0DOX2|IGA2_HUMAN/sp|P01877|IGHA2_HUMAN	144/246/131
LPTQJITFQTESSVAEQEAEFQSPK	5 4 2 0 0	(N(N(H(H(N(H(A))))(H(N(H(A)))))))	sp|Q14624|ITIH4_HUMAN	517
PTHVJVSVVMAEVDGTC	5 5 2 0 1	(N(F)(N(H(N)(H(N(H(A))))(H(N(H(A)))))))	sp|P01876|IGHA1_HUMAN	340
ELHHLQEQJVSNAFLDKGEFYIGSK	6 5 3 0 1	(N(N(H(H(N(F)(H(A))))(H(N(H(A)))(N(H(A)))))))	sp|P00450|CERU_HUMAN	762
ADGTVNQIEGEATPVJLTEPAKLEVK	5 4 2 0 0	(N(N(H(H(N(H(A))))(H(N(H(A)))))))	sp|P05090|APOD_HUMAN	98
PSTGTGVMLALVSGJNTVPFAVSLVDSTSEK	5 4 2 0 0	(N(N(H(H(N(H(A))))(H(N(H(A)))))))	sp|P07225|PROS_HUMAN	530
VSHHJLTTGATLINEQWLLTTAK	5 4 2 0 0	(N(N(H(H(N(H(A))))(H(N(H(A)))))))	sp|P00739|HPTR_HUMAN/sp|P00738|HPT_HUMAN	126/184
SJASSTDSASYYPLTGDTR	5 4 2 0 0	(N(N(H(H(N(H(A))))(H(N(H(A)))))))	sp|P04114|APOB_HUMAN	983
VDKDLQSLEDILHQVEJK	2 3 0 0 0	(N(N(H(H(N)))))	sp|P02679|FIBG_HUMAN	78
JISDGFDGIPDNVDAALALPAHSYSGR	6 5 2 0 1	(N(N(H(H(N(H)(F)))(H(N(H(A)))(N(H(A)))))))	sp|P04004|VTNC_HUMAN	242
MVSHHJLTTGATLINEQWLLTTAK	5 4 1 0 3	(N(N(H(H(N(F)(H(A))))(H(N(F)(H(F)))))))	sp|P00739|HPTR_HUMAN/sp|P00738|HPT_HUMAN	126/184
GQAQJY	4 4 0 0 1	(N(F)(N(H(H(N))(H(N(H))))))	sp|Q9NTN9|SEM4G_HUMAN	55
NEEYJK	5 4 1 0 0	(N(N(H(H(N(H)))(H(N(H(A)))))))	sp|P02763|A1AG1_HUMAN/sp|P19652|A1AG2_HUMAN	56/56
LVPVPITJATLDR	6 5 2 0 1	(N(N(H(H(N(F)(H(A))))(H(N(H))(N(H(A)))))))	sp|P19652|A1AG2_HUMAN	33
LAJLTQGEDQYYLR	6 5 3 0 0	(N(N(H(H(N(H(A))))(H(N(H(A)))(N(H(A)))))))	sp|P10909|CLUS_HUMAN	374
QLAHQSJSTNIFFSPVSIATAF	5 4 2 0 1	(N(F)(N(H(H(N(H(A))))(H(N(H(A)))))))	sp|P01009|A1AT_HUMAN	70
QDQCIYJTTYLNVQR	8 7 3 0 1	(N(N(H(H(N(H))(N(F)(H(A))))(H(N(H(A)))(N(H(N(H(A)))))))))	sp|P02763|A1AG1_HUMAN	93
AVJITSENLIDDVVSLIR	5 4 2 0 1	(N(F)(N(H(H(N(H(A))))(H(N(H(A)))))))	sp|P02748|CO9_HUMAN	415
VDKDLQSLEDILHQVEJK	4 4 1 0 0	(N(N(H(H(N))(H(N(H(A)))))))	sp|P02679|FIBG_HUMAN	78
VSJQTLSLFFTVLQDVPVR	5 4 1 0 1	(N(N(H(H(N(H)(F)))(H(N(H(A)))))))	sp|P01023|A2MG_HUMAN	1424
QLVEIEKVVLHPJYSQVDIGLIK	5 6 2 0 2	(N(N(H(H(N)(N(F)(H(A))))(H(N)(N(F)(H(A)))))))	sp|P00738|HPT_HUMAN	241
AALAAFNAQNJGSNFQLEEISR	6 5 3 0 1	(N(F)(N(H(H(N(H(A))))(H(N(H(A)))(N(H(A)))))))	sp|P02765|FETUA_HUMAN	176
QIJDSFRLGTQEYLQQLESHMK	4 3 1 0 0	(N(N(H(H)(H(N(H(A)))))))	sp|Q6P2E9|EDC4_HUMAN	1138
YLGJATAIFFLPDEGK	5 4 2 0 1	(N(N(H(H(N(H(A))))(H(N(F)(H(A)))))))	sp|P01009|A1AT_HUMAN	271
PALEDLLLGSEAJLTCTLTGLR	5 2 0 0 0	(N(N(H(H(H(H(H)))))))	sp|P01876|IGHA1_HUMAN/sp|P0DOX2|IGA2_HUMAN/sp|P01877|IGHA2_HUMAN	144/246/131
AALAAFNAQNJGSNFQLEEISR	8 7 1 0 0	(N(N(H(H(N(H(A))))(H(N(H(N(H(N(H(N(H))))))))))))	sp|P02765|FETUA_HUMAN	176
GLTFQQJASSMCVPDQDTAIR	5 5 1 0 1	(N(N(H(H(N(F)))(H(N(H))(N(H(A)))))))	sp|P0DOX6|IGM_HUMAN/sp|P01871|IGHM_HUMAN	332/209
SIPACVPWSPYLFQPJDTCIVSGWGR	5 4 2 0 0	(N(N(H(H(N(H(A))))(H(N(H(A)))))))	sp|P05156|CFAI_HUMAN	464
GLTFQQJASSMCVPDQDTAIR	5 4 2 0 1	(N(F)(N(H(H(N(H(A))))(H(N(H(A)))))))	sp|P0DOX6|IGM_HUMAN/sp|P01871|IGHM_HUMAN	332/209
VPVPITJATLDQITGK	4 7 1 0 0	(N(N(H(N)(H(N)(N))(H(N)(N(H(A)))))))	sp|P02763|A1AG1_HUMAN	33
AJLSSQALQMSLDYGFVTPLTSMSIR	5 4 1 0 2	(N(N(H(H(N(H)(F)))(H(N(F)(H(A)))))))	sp|P19827|ITIH1_HUMAN	588
JLSMPLLPADFHK	6 5 3 0 0	(N(N(H(H(N(H(A))))(H(N(H(A)))(N(H(A)))))))	sp|P05546|HEP2_HUMAN	49
FGCEIENJR	5 4 2 0 0	(N(N(H(H(N(H(A))))(H(N(H(A)))))))	sp|P25311|ZA2G_HUMAN	128
QJQCFYJSSYLNVQR	6 5 3 0 0	(N(N(H(H(N(H(A))))(H(N(H(A)))(N(H(A)))))))	sp|P19652|A1AG2_HUMAN	88
EEQFJSTFR	4 5 0 0 1	(N(F)(N(H(N)(H(N))(H(N(H))))))	sp|P01859|IGHG2_HUMAN	176
YFTPJKTEDTIFLR	6 5 3 0 0	(N(N(H(H(N(H(A))))(H(N(H(A)))(N(H(A)))))))	sp|P02763|A1AG1_HUMAN/sp|P19652|A1AG2_HUMAN	72/72
LVPVPITJATLDR	6 5 3 0 1	(N(N(H(H(N(F)(H(A))))(H(N(H(A)))(N(H(A)))))))	sp|P19652|A1AG2_HUMAN	33
TQEAYEMAVRGLIRPMJK	4 3 0 0 0	(N(N(H(H(H))(H(N)))))	sp|O95900|TRUB2_HUMAN	202
QKWFPAAINLVYTFAWJK	5 4 1 0 0	(N(N(H(H(N(H)))(H(N(H(A)))))))	sp|Q9UKZ4|TEN1_HUMAN	1084
EEQYJSTYR	5 4 0 0 1	(N(F)(N(H(H(N(H)))(H(N(H))))))	sp|P0DOX5|IGG1_HUMAN/sp|P01857|IGHG1_HUMAN	299/180
EEQYJSTYR	4 4 1 0 1	(N(F)(N(H(H(N))(H(N(H(A)))))))	sp|P0DOX5|IGG1_HUMAN/sp|P01857|IGHG1_HUMAN	299/180
VDKDLQSLEDILHQVEJK	4 5 0 0 2	(N(N(H(H(N(F)))(H(N(H))(N(F))))))	sp|P02679|FIBG_HUMAN	78
TLFCJASK	5 4 2 0 0	(N(N(H(H(N(H(A))))(H(N(H(A)))))))	sp|P20851|C4BPB_HUMAN	64
LVPVPITJATLDR	6 5 2 0 1	(N(N(H(H(N(H)(F)))(H(N(H(A)))(N(H(A)))))))	sp|P19652|A1AG2_HUMAN	33
AJLSSQALQMSLDYGFVTPLTSMSIR	5 4 1 0 0	(N(N(H(H(N(H)))(H(N(H(A)))))))	sp|P19827|ITIH1_HUMAN	588
YLGJATAIFFLPDEGK	6 3 1 0 0	(N(N(H(H)(H(H)(H(N(H(A))))))))	sp|P01009|A1AT_HUMAN	271
QLAHQSJSTNIFFSPVSIATAFAMLSLGTK	5 4 1 0 4	(N(F)(N(H(H(N(F)(H(A))))(H(N(F)(H(F)))))))	sp|P01009|A1AT_HUMAN	70
LKELPGVCJETMMALWEECKPCLK	6 5 3 0 0	(N(N(H(H(N(H(A))))(H(N(H(A)))(N(H(A)))))))	sp|P10909|CLUS_HUMAN	103
STGKPTLYJVSLVMSDTAGTCY	8 2 0 0 0	(N(N(H(H)(H(H)(H(H(H(H))))))))	sp|P0DOX6|IGM_HUMAN/sp|P01871|IGHM_HUMAN	563/440
LAGKPTHVJVSVVMAEVDGTCY	5 5 2 0 0	(N(N(H(N)(H(N(H(A))))(H(N(H(A)))))))	sp|P01876|IGHA1_HUMAN	340
LVPVPITJATLDR	5 4 2 0 1	(N(N(H(H(N(H(A))))(H(N(F)(H(A)))))))	sp|P19652|A1AG2_HUMAN	33
IPCSQPPQIEHGTIJSSR	5 4 2 0 1	(N(N(H(H(N(H(A))))(H(N(F)(H(A)))))))	sp|P08603|CFAH_HUMAN	882
ADGTVNQIEGEATPVJLTEPAKLEVK	6 5 2 0 1	(N(F)(N(H(H(N(H(A))))(H(N(H(N(H(A)))))))))	sp|P05090|APOD_HUMAN	98
VYLQGLIDCYLFGJSSTVLEDSK	5 3 1 0 0	(N(N(H(H(H))(H(N(H(A)))))))	sp|P35542|SAA4_HUMAN	94
LAGKPTHVJVSVVMAEVDGTC	6 5 2 0 1	(N(F)(N(H(H(N(H(A))))(H(N(H(N(H(A)))))))))	sp|P01876|IGHA1_HUMAN	340
JISDGFDGIPDNVDAALALPAHSY	6 5 3 0 0	(N(N(H(H(N(H(A))))(H(N(H(A)))(N(H(A)))))))	sp|P04004|VTNC_HUMAN	242
ADGTVNQIEGEATPVJLTEPAK	5 4 1 0 0	(N(N(H(H(N(H)))(H(N(H(A)))))))	sp|P05090|APOD_HUMAN	98
SVQEIQATFFYFTPJKTEDTIFLR	7 6 2 0 1	(N(N(H(H(N(H))(N(H(A))))(H(N(H)(F))(N(H(A)))))))	sp|P02763|A1AG1_HUMAN/sp|P19652|A1AG2_HUMAN	72/72
FJSSYLQGTNQITGR	5 2 0 0 0	(N(N(H(H(H)(H(H))))))	sp|P04114|APOB_HUMAN	1523
HGVIISSTVDTYEJGSSVEYR	6 5 3 0 0	(N(N(H(H(N(H(A))))(H(N(H(A)))(N(H(A)))))))	sp|P05160|F13B_HUMAN	545
QISQKAFLFJSSEQVA	5 4 2 0 0	(N(N(H(H(N(H(A))))(H(N(H(A)))))))	sp|Q8N807|PDILT_HUMAN	160
SQILEGLGFJLTELSESDVHR	6 5 3 0 1	(N(N(H(H(N(F)(H(A))))(H(N(H(A)))(N(H(A)))))))	sp|P29622|KAIN_HUMAN	108
VGQLQLSHJLSLVILVPQNLK	5 4 2 0 0	(N(N(H(H(N(H(A))))(H(N(H(A)))))))	sp|P05155|IC1_HUMAN	352
GLJVTLSSTGR	4 3 0 0 0	(N(N(H(H(H))(H(N)))))	sp|P0C0L4|CO4A_HUMAN/sp|P0C0L5|CO4B_HUMAN	1328/1328
MVSHHJLTTGATLINEQWLLTTAK	5 4 2 0 1	(N(F)(N(H(H(N(H(A))))(H(N(H(A)))))))	sp|P00739|HPTR_HUMAN/sp|P00738|HPT_HUMAN	126/184
GFLALYQTVAVJYSQPISEASR	5 4 2 0 0	(N(N(H(H(N(H(A))))(H(N(H(A)))))))	sp|Q9NZP8|C1RL_HUMAN	166
QDQCIYJTTYLNVQR	6 5 3 0 2	(N(N(H(H(N(F)(H(A))))(H(N(H(A)))(N(F)(H(A)))))))	sp|P02763|A1AG1_HUMAN	93
KQLVEIEKVVLHPJYSQVDIGLIK	5 6 2 0 2	(N(N(H(H(N(F))(N(F)))(H(N(H(A)))(N(H(A)))))))	sp|P00738|HPT_HUMAN	241
SVVAPATDGGLJLTSTFLR	5 4 1 0 1	(N(F)(N(H(H(N(H)))(H(N(H(A)))))))	sp|P41222|PTGDS_HUMAN	78
GTGJDTVLNVALLNVISNQECNIK	5 4 2 0 0	(N(N(H(H(N(H(A))))(H(N(H(A)))))))	sp|Q2TV78|MST1L_HUMAN/sp|P26927|HGFL_HUMAN	619/615
YTGJASALFILPDQDK	5 4 2 0 0	(N(N(H(H(N(H(A))))(H(N(H(A)))))))	sp|P01011|AACT_HUMAN	271
ADTHDEILEGLNFJLTEIPEAQIHEGFQELLR	7 6 3 0 1	(N(N(H(H(N(H)(F))(N(H(A))))(H(N(H(A)))(N(H(A)))))))	sp|P01009|A1AT_HUMAN	107
SHJMTTTLNYR	5 4 2 0 0	(N(N(H(H(N(H(A))))(H(N(H(A)))))))	sp|P08603|CFAH_HUMAN	822
ALPQPQJVTSLLGCTH	6 5 3 0 0	(N(N(H(H(N(H(A))))(H(N(H(A)))(N(H(A)))))))	sp|P02790|HEMO_HUMAN	453
MLJTSSLLEQLNEQFNWVSR	6 5 3 0 1	(N(F)(N(H(H(N(H(A))))(H(N(H(A)))(N(H(A)))))))	sp|P10909|CLUS_HUMAN	354
LNAENJATFYFK	5 4 2 0 1	(N(F)(N(H(H(N(H(A))))(H(N(H(A)))))))	sp|P01042|KNG1_HUMAN	294
JGSLFAFR	4 3 1 0 0	(N(N(H(H)(H(N(H(A)))))))	sp|P04004|VTNC_HUMAN	169
PALEDLLLGSEAJLTCTLTGLR	5 3 1 0 0	(N(N(H(H(H))(H(N(H(A)))))))	sp|P01876|IGHA1_HUMAN/sp|P0DOX2|IGA2_HUMAN/sp|P01877|IGHA2_HUMAN	144/246/131
VVLHPJYSQVDIGLIK	7 6 4 0 1	(N(N(H(H(N(H(A)))(N(H(A))))(H(N(H(A)))(N(F)(H(A)))))))	sp|P00738|HPT_HUMAN	241
QDQCIYJTTYLNVQR	8 7 3 0 0	(N(N(H(H(N(H))(N(H(A))))(H(N(H(A)))(N(H(N(H(A)))))))))	sp|P02763|A1AG1_HUMAN	93
EJLTAPGSDSAVFFEQGTTR	6 5 3 0 1	(N(F)(N(H(H(N(H(A))))(H(N(H(A)))(N(H(A)))))))	sp|P00450|CERU_HUMAN	397
ALPQPQJVTSLLGCTH	4 4 1 0 0	(N(N(H(H(N))(H(N(H(A)))))))	sp|P02790|HEMO_HUMAN	453
YLGJATAIFFLPDEGK	5 4 2 0 1	(N(F)(N(H(H(N(H(A))))(H(N(H(A)))))))	sp|P01009|A1AT_HUMAN	271
NVIFSPLSISTALAFLSLGAHJTTLTEILK	6 5 3 0 0	(N(N(H(N(H(A)))(H(N(H(A))))(H(N(H(A)))))))	sp|P01011|AACT_HUMAN	93
SLGNVJFTVSAEALESQELCGTEVPSVPEHGR	4 4 1 0 0	(N(N(H(H(N))(H(N(H(A)))))))	sp|P01023|A2MG_HUMAN	869
GLJVTLSSTG	5 4 2 0 0	(N(N(H(H(N(H(A))))(H(N(H(A)))))))	sp|P0C0L4|CO4A_HUMAN/sp|P0C0L5|CO4B_HUMAN	1328/1328
JVTAEQAR	5 4 2 0 0	(N(N(H(H(N(H(A))))(H(N(H(A)))))))	sp|P00748|FA12_HUMAN	249
LAJLTQGEDQYYLR	6 5 4 0 0	(N(N(H(H(N(H(A))))(H(N(H(A)))(N(H(A)(A)))))))	sp|P10909|CLUS_HUMAN	374
YSJETK	5 4 2 0 0	(N(N(H(H(N(H(A))))(H(N(H(A)))))))	sp|A6NMZ7|CO6A6_HUMAN	275
STGKPTLYJVSLVMSDTAGTCY	7 2 0 0 0	(N(N(H(H)(H(H(H(H(H))))))))	sp|P0DOX6|IGM_HUMAN/sp|P01871|IGHM_HUMAN	563/440
ELHHLQEQJVSNAFLDKGEFYIGSK	5 4 2 0 1	(N(F)(N(H(H(N(H(A))))(H(N(H(A)))))))	sp|P00450|CERU_HUMAN	762
DTFVJASR	5 4 2 0 0	(N(N(H(H(N(H(A))))(H(N(H(A)))))))	sp|P05155|IC1_HUMAN	238
LSLHRPALEDLLLGSEAJLTCTLTGLR	4 4 1 0 0	(N(N(H(H(N))(H(N(H(A)))))))	sp|P01876|IGHA1_HUMAN/sp|P0DOX2|IGA2_HUMAN/sp|P01877|IGHA2_HUMAN	144/246/131
NAHGEEKEJLTAR	6 5 3 0 0	(N(N(H(H(N(H(A))))(H(N(H(A)))(N(H(A)))))))	sp|Q06033|ITIH3_HUMAN	580
VTQJLTLIEESLTSEFIHDIDR	5 4 2 0 0	(N(N(H(H(N(H(A))))(H(N(H(A)))))))	sp|P36955|PEDF_HUMAN	285
AGLQAFFQVQECJK	6 5 3 0 0	(N(N(H(H(N(H(A))))(H(N(H(A)))(N(H(A)))))))	sp|P00450|CERU_HUMAN	358
NJATVHEQVGGPSLTSDLQAQSK	6 5 3 0 1	(N(N(H(H(N(F)(H(A))))(H(N(H(A)))(N(H(A)))))))	sp|P04004|VTNC_HUMAN	86
MVSHHJLTTGATLINEQWLLTTAK	6 5 2 0 1	(N(F)(N(H(H(N(H(A))))(H(N(H(N(H(A)))))))))	sp|P00739|HPTR_HUMAN/sp|P00738|HPT_HUMAN	126/184
KVCQDCPLLAPLJDTR	6 5 3 0 1	(N(N(H(H(N(F)(H(A))))(H(N(H(A)))(N(H(A)))))))	sp|P02765|FETUA_HUMAN	156
VVLHPJYSQVDIGLIK	7 6 3 0 1	(N(N(H(H(N(H)(F))(N(H(A))))(H(N(H(A)))(N(H(A)))))))	sp|P00738|HPT_HUMAN	241
EJGTVSR	5 4 2 0 0	(N(N(H(H(N(H(A))))(H(N(H(A)))))))	sp|P19652|A1AG2_HUMAN	103
EJGTVSR	7 6 4 0 0	(N(N(H(H(N(H(A)))(N(H(A))))(H(N(H(A)))(N(H(A)))))))	sp|P19652|A1AG2_HUMAN	103
DFYVDEJTTVR	5 4 2 0 0	(N(N(H(H(N(H(A))))(H(N(H(A)))))))	sp|P29622|KAIN_HUMAN	238
ADGTVNQIEGEATPVJLTEPAKLEVK	6 5 1 0 1	(N(F)(N(H(H(N(H(A))))(H(N(H))(N(H))))))	sp|P05090|APOD_HUMAN	98
ELHHLQEQJVSNAFLDK	6 5 3 0 2	(N(F)(N(H(H(N(F)(H(A))))(H(N(H(A)))(N(H(A)))))))	sp|P00450|CERU_HUMAN	762
SVQEIQATFFYFTPJKTEDTIFLR	7 4 3 0 2	(N(F)(N(H(H(H)(H))(H(N(H(A(A))))(N(F)(H(A)))))))	sp|P02763|A1AG1_HUMAN/sp|P19652|A1AG2_HUMAN	72/72
DJFCNK	5 4 2 0 0	(N(N(H(H(N(H(A))))(H(N(H(A)))))))	sp|Q9Y5K1|SPO11_HUMAN	236
DFVJASSK	5 4 2 0 0	(N(N(H(H(N(H(A))))(H(N(H(A)))))))	sp|P05546|HEP2_HUMAN	188
VTQVYAEJGTVLQGSTVASVYK	6 5 3 0 1	(N(N(H(H(N(F)(H(A))))(H(N(H(A)))(N(H(A)))))))	sp|P27169|PON1_HUMAN	324
TVLTPATNHMGJVTFTIPANR	6 3 1 0 0	(N(N(H(H)(H(H)(H(N(H(A))))))))	sp|P01024|CO3_HUMAN	85
STGKPTLYJVSLVMSDTAGTCY	8 2 0 0 0	(N(N(H(H(H(H(H(H(H(H))))))))))	sp|P0DOX6|IGM_HUMAN/sp|P01871|IGHM_HUMAN	563/440
ADTHDEILEGLNFJLTEIPEAQIHEGFQELLR	5 4 1 0 1	(N(N(H(H(N(H)(F)))(H(N(H(A)))))))	sp|P01009|A1AT_HUMAN	107
GTAGNALMDGASQLMGEJR	4 4 1 0 0	(N(N(H(H(N))(H(N(H(A)))))))	sp|P02675|FIBB_HUMAN	394
YTGJASALFILPDQDK	7 6 4 0 0	(N(N(H(H(N(H(A)))(N(H(A))))(H(N(H(A)))(N(H(A)))))))	sp|P01011|AACT_HUMAN	271
STGKPTLYJVSLVMSDTAGTCY	6 2 0 0 0	(N(N(H(H(H))(H(H(H))))))	sp|P0DOX6|IGM_HUMAN/sp|P01871|IGHM_HUMAN	563/440
VVLHPJYSQVDIGLIK	6 5 1 0 1	(N(N(H(H(N(H)(F)))(H(N(H(N(H(A)))))))))	sp|P00738|HPT_HUMAN	241
VVLHPJYSQVDIGLIK	3 3 1 0 0	(N(N(H(H(N(H(A)))))))	sp|P00738|HPT_HUMAN	241
QVETIRNLVDSYMSIIJK	4 3 0 0 0	(N(N(H(H)(H(N(H))))))	sp|Q9UQ16|DYN3_HUMAN	674
JGSLFAFR	5 4 2 0 0	(N(N(H(H(N(H(A))))(H(N(H(A)))))))	sp|P04004|VTNC_HUMAN	169
QLAHQSJSTNIFFSPVSIATAFAMLSLGTK	5 4 3 0 0	(N(N(H(H(N(H(A))))(H(N(H(A(A))))))))	sp|P01009|A1AT_HUMAN	70
LAJLTQGEDQYYLR	6 5 3 0 1	(N(N(H(H(N(F)(H(A))))(H(N(H(A)))(N(H(A)))))))	sp|P10909|CLUS_HUMAN	374
PALEDLLLGSEAJLTCTLTGLR	3 4 0 0 0	(N(N(H(H(N))(H(N)))))	sp|P01876|IGHA1_HUMAN/sp|P0DOX2|IGA2_HUMAN/sp|P01877|IGHA2_HUMAN	144/246/131
YLGJATAIFFLPDEGK	6 5 2 0 0	(N(N(H(H(N(H(A))))(H(N(H))(N(H(A)))))))	sp|P01009|A1AT_HUMAN	271
GCVLLSYLJETVTVSASLESVR	5 4 1 0 2	(N(F)(N(H(H(N(H(A))))(H(N(H(F)))))))	sp|P01023|A2MG_HUMAN	55
PALEDLLLGSEAJLTCTLTGLR	5 4 2 0 0	(N(N(H(H(N(H(A))))(H(N(H(A)))))))	sp|P01876|IGHA1_HUMAN/sp|P0DOX2|IGA2_HUMAN/sp|P01877|IGHA2_HUMAN	144/246/131
NQALJLSLAYSFVTPL	5 4 2 0 0	(N(N(H(H(N(H(A))))(H(N(H(A)))))))	sp|Q14624|ITIH4_HUMAN	577
GLTFQQJASSMCVPDQDTAIR	5 5 1 0 1	(N(N(H(N)(H(N(H)(F)))(H(N(H(A)))))))	sp|P0DOX6|IGM_HUMAN/sp|P01871|IGHM_HUMAN	332/209
MVSHHJLTTGATLINEQWLLTTAK	6 5 2 0 3	(N(N(H(H(N(F)(H(A))))(H(N(H)(F))(N(F)(H(A)))))))	sp|P00739|HPTR_HUMAN/sp|P00738|HPT_HUMAN	126/184
KKEDALJETR	6 5 3 0 0	(N(N(H(H(N(H(A))))(H(N(H(A)))(N(H(A)))))))	sp|P10909|CLUS_HUMAN	86
VDKDLQSLEDILHQVEJK	4 4 1 0 1	(N(F)(N(H(H(N))(H(N(H(A)))))))	sp|P02679|FIBG_HUMAN	78
TAFITJFTLTIDGVTYPGNVK	5 4 2 0 0	(N(N(H(H(N(H(A))))(H(N(H(A)))))))	sp|Q06033|ITIH3_HUMAN	91
MLJTSSLLEQLNEQFNWVSR	5 4 2 0 0	(N(N(H(H(N(H(A))))(H(N(H(A)))))))	sp|P10909|CLUS_HUMAN	354
VSJQTLSLFFTVLQDVPVR	5 5 2 0 1	(N(F)(N(H(H(N(H(A))))(H(N)(N(H(A)))))))	sp|P01023|A2MG_HUMAN	1424
MVSHHJLTTGATLINEQWLLTTAK	5 4 2 0 1	(N(N(H(H(N(H(A))))(H(N(F)(H(A)))))))	sp|P00739|HPTR_HUMAN/sp|P00738|HPT_HUMAN	126/184
QSVPAHFVALJGSK	6 3 1 0 0	(N(N(H(H)(H(H)(H(N(H(A))))))))	sp|P06681|CO2_HUMAN	621
YKEHEGAIYPDJTTDFQR	5 4 2 0 0	(N(N(H(H(N(H(A))))(H(N(H(A)))))))	sp|P00450|CERU_HUMAN	138
EJISDPTSPLR	5 4 1 0 0	(N(N(H(H(N(H)))(H(N(H(A)))))))	sp|P01591|IGJ_HUMAN	71
JLTVSVHVSPVEGLCLAGGGGLAQQVLVPAGSAR	5 4 2 0 0	(N(N(H(H(N(H(A))))(H(N(H(A)))))))	sp|P0C0L4|CO4A_HUMAN/sp|P0C0L5|CO4B_HUMAN	862/862
TELFSSSCPGGIMLJETGQGYQR	5 4 2 0 0	(N(N(H(H(N(H(A))))(H(N(H(A)))))))	sp|O95445|APOM_HUMAN	135
TVLTPATNHMGJVTFTIPANR	7 2 0 0 0	(N(N(H(H)(H(H(H))(H(H))))))	sp|P01024|CO3_HUMAN	85
FJLTETSEAEIHQSFQHLLR	5 4 2 0 0	(N(N(H(H(N(H(A))))(H(N(H(A)))))))	sp|P01011|AACT_HUMAN	106
PALEDLLLGSEAJLTCTLTGLR	4 5 0 0 0	(N(N(H(N)(H(N))(H(N(H))))))	sp|P01876|IGHA1_HUMAN/sp|P0DOX2|IGA2_HUMAN/sp|P01877|IGHA2_HUMAN	144/246/131
VIDFJCTTSSVSSALANTK	5 3 1 0 0	(N(N(H(H(H))(H(N(H(A)))))))	sp|P04196|HRG_HUMAN	125
LAGKPTHVJVSVVMAEVDGTCY	6 5 2 0 1	(N(F)(N(H(H(N(H(A))))(H(N(H(N(H(A)))))))))	sp|P01876|IGHA1_HUMAN	340
SSVITLNTNAELFJQSDIVAHLLSSSSSVIDALQYK	8 2 0 0 0	(N(N(H(H(H(H)))(H(H)(H(H))))))	sp|P04114|APOB_HUMAN	3358
ANLVPVPITJATLDQITGK	6 5 3 0 0	(N(N(H(H(N(H(A))))(H(N(H(A)))(N(H(A)))))))	sp|P02763|A1AG1_HUMAN	33
ADTHDEILEGLNFJLTEIPEAQIHEGFQELLR	6 5 2 0 1	(N(N(H(H(N(F)(H(A))))(H(N(H))(N(H(A)))))))	sp|P01009|A1AT_HUMAN	107
EHEGAIYPDJTTDFQR	6 5 3 0 1	(N(N(H(H(N(F)(H(A))))(H(N(H(A)))(N(H(A)))))))	sp|P00450|CERU_HUMAN	138
QVLFLDTVYGJCSTHFTVK	5 2 0 0 0	(N(N(H(H(H)(H(H))))))	sp|P04114|APOB_HUMAN	185
YKJNSDISSTR	4 3 0 0 1	(N(F)(N(H(H)(H(N(H))))))	sp|P01871|IGHM_HUMAN	46
FSDGLESJSSTQFEVK	9 2 0 0 0	(N(N(H(H(H)(H))(H(H(H))(H(H))))))	sp|P0C0L4|CO4A_HUMAN/sp|P0C0L5|CO4B_HUMAN	226/226
AVJITSENLIDDVVSLIR	5 4 2 0 1	(N(N(H(H(N(H(A))))(H(N(F)(H(A)))))))	sp|P02748|CO9_HUMAN	415
LVPVPITJATLDQITGK	6 4 1 0 0	(N(N(H(H(H))(H(N(H))(N(H(A)))))))	sp|P02763|A1AG1_HUMAN	33
QIGLYPVLVIDSSGYVNPJYTGR	5 4 2 0 0	(N(N(H(H(N(H(A))))(H(N(H(A)))))))	sp|P01833|PIGR_HUMAN	186
ALPQPQJVTSLLGCTH	6 5 3 0 1	(N(N(H(H(N(F)(H(A))))(H(N(H(A)))(N(H(A)))))))	sp|P02790|HEMO_HUMAN	453
LDAPTNLQFVJETDSTVLVR	5 4 1 0 1	(N(F)(N(H(H(N(H)))(H(N(H(A)))))))	sp|P02751|FINC_HUMAN	1007
YSJETK	5 4 1 0 0	(N(N(H(H(N(H)))(H(N(H(A)))))))	sp|A6NMZ7|CO6A6_HUMAN	275
VVLHPJYSQVDIGLIK	7 6 4 0 0	(N(N(H(H(N(H(A)))(N(H(A))))(H(N(H(A)))(N(H(A)))))))	sp|P00738|HPT_HUMAN	241
PALEDLLLGSEAJLTCTLTGLR	4 4 1 0 0	(N(N(H(H(N))(H(N(H(A)))))))	sp|P01876|IGHA1_HUMAN/sp|P0DOX2|IGA2_HUMAN/sp|P01877|IGHA2_HUMAN	144/246/131
EGDHEFLEVPEAQEDVEATFPVHQPGJYSC	5 4 2 0 0	(N(N(H(H(N(H(A))))(H(N(H(A)))))))	sp|P04217|A1BG_HUMAN	179
SWPAVGJCSSALR	5 4 2 0 1	(N(N(H(H(N(H(A))))(H(N(F)(H(A)))))))	sp|P02790|HEMO_HUMAN	187
STGKPTLYJVSLVMSDTAGTCY	8 2 0 0 0	(N(N(H(H(H))(H(H)(H(H(H)))))))	sp|P0DOX6|IGM_HUMAN/sp|P01871|IGHM_HUMAN	563/440
QJQCFYJSSYLNVQR	7 6 2 0 1	(N(N(H(H(N(H))(N(H)(F)))(H(N(H(A)))(N(H(A)))))))	sp|P19652|A1AG2_HUMAN	88
SIPACVPWSPYLFQPJDTCIVSGWGR	5 4 1 0 0	(N(N(H(H(N(H)))(H(N(H(A)))))))	sp|P05156|CFAI_HUMAN	464
VLSJNSDANLELINTWVAK	5 4 2 0 1	(N(F)(N(H(H(N(H(A))))(H(N(H(A)))))))	sp|P05155|IC1_HUMAN	253
IPCSQPPQIEHGTIJSSR	5 4 1 0 1	(N(F)(N(H(H(N(H)))(H(N(H(A)))))))	sp|P08603|CFAH_HUMAN	882
IIVPLNNREJISDPTSPLR	5 3 1 0 1	(N(F)(N(H(H(H))(H(N(H(A)))))))	sp|P01591|IGJ_HUMAN	71
GVNFJVSK	5 4 2 0 0	(N(N(H(H(N(H(A))))(H(N(H(A)))))))	sp|P03952|KLKB1_HUMAN	127
QKWFPAAINLVYTFAWJK	4 4 1 0 0	(N(N(H(H(N))(H(N(H(A)))))))	sp|Q9UKZ4|TEN1_HUMAN	1084
HAJWTLTPLK	5 4 2 0 0	(N(N(H(H(N(H(A))))(H(N(H(A)))))))	sp|P27169|PON1_HUMAN	253
FSDGLESJSSTQFEVK	9 2 0 0 0	(N(N(H(H(H))(H(H)(H(H(H(H))))))))	sp|P0C0L4|CO4A_HUMAN/sp|P0C0L5|CO4B_HUMAN	226/226
LVPVPITJATLDR	7 6 2 0 1	(N(N(H(H(N(H))(N(H)(F)))(H(N(H(A)))(N(H(A)))))))	sp|P19652|A1AG2_HUMAN	33
NEEYJK	6 5 2 0 1	(N(N(H(H(N(H)(F)))(H(N(H(A)))(N(H(A)))))))	sp|P02763|A1AG1_HUMAN/sp|P19652|A1AG2_HUMAN	56/56
NPPMGGNVVIFDTVITNQEEPYQJHSGR	5 4 2 0 1	(N(F)(N(H(H(N(H(A))))(H(N(H(A)))))))	sp|P02745|C1QA_HUMAN	146
GCVLLSYLJETVTVSASLESVR	5 4 1 0 1	(N(F)(N(H(H(N(H)))(H(N(H(A)))))))	sp|P01023|A2MG_HUMAN	55
QLAHQSJSTNIFFSPVSIATAFAMLSLGTK	5 4 1 0 2	(N(N(H(H(N(H)(F)))(H(N(F)(H(A)))))))	sp|P01009|A1AT_HUMAN	70
SLTFJETYQDISELVYGAK	5 4 2 0 1	(N(N(H(H(N(H(A))))(H(N(F)(H(A)))))))	sp|P01008|ANT3_HUMAN	187
QDQCIYJTTYLNVQR	7 6 2 0 1	(N(N(H(H(N(H))(N(H)(F)))(H(N(H(A)))(N(H(A)))))))	sp|P02763|A1AG1_HUMAN	93
PTQJITFQTESSVAEQEAEFQSPK	4 7 1 0 0	(N(N(H(N)(H(N)(N))(H(N)(N(H(A)))))))	sp|Q14624|ITIH4_HUMAN	517
QDQCIYJTTYLNVQR	6 5 3 0 1	(N(N(H(H(N(F)(H(A))))(H(N(H(A)))(N(H(A)))))))	sp|P02763|A1AG1_HUMAN	93
SJSTNIFFSPVSIATAFAMLSLGTK	5 4 2 0 0	(N(N(H(H(N(H(A))))(H(N(H(A)))))))	sp|P01009|A1AT_HUMAN	70
NEEYJK	6 5 3 0 2	(N(F)(N(H(H(N(F)(H(A))))(H(N(H(A)))(N(H(A)))))))	sp|P02763|A1AG1_HUMAN/sp|P19652|A1AG2_HUMAN	56/56
STGKPTLYJVSLVMSDTAGTC	8 2 0 0 0	(N(N(H(H)(H(H)(H(H(H(H))))))))	sp|P0DOX6|IGM_HUMAN/sp|P01871|IGHM_HUMAN	563/440
LVPVPITJATLDQITGK	6 5 2 0 1	(N(N(H(H(N(H(A))))(H(N(H)(F))(N(H(A)))))))	sp|P02763|A1AG1_HUMAN	33
ESVTDHVNLITPLEKPLQJFTLCFR	5 4 1 0 0	(N(N(H(H(N(H)))(H(N(H(A)))))))	sp|P02743|SAMP_HUMAN	51
PGGQJDSQQGQLEENNNR	5 4 1 0 2	(N(N(H(H(N(H)(F)))(H(N(F)(H(A)))))))	sp|Q969H0|FBXW7_HUMAN	70
QQGTIVGMRLASCJK	5 4 2 0 0	(N(N(H(H(N(H(A))))(H(N(H(A)))))))	sp|Q6P4Q7|CNNM4_HUMAN	55
YTGJASALFILPDQDKMEEVEAMLLPETLK	5 4 2 0 0	(N(N(H(H(N(H(A))))(H(N(H(A)))))))	sp|P01011|AACT_HUMAN	271
DIVEYYJDSJGSHVLQGR	5 4 2 0 1	(N(F)(N(H(H(N(H(A))))(H(N(H(A)))))))	sp|P25311|ZA2G_HUMAN	109
LQAPLJYTEFQKPICLPSK	5 4 2 0 0	(N(N(H(H(N(H(A))))(H(N(H(A)))))))	sp|P03952|KLKB1_HUMAN	494
GCVLLSYLJETVTVSASLESVR	6 5 2 0 1	(N(F)(N(H(H(N(H(A))))(H(N(H(N(H(A)))))))))	sp|P01023|A2MG_HUMAN	55
GGSSGWSGGLAQJR	5 4 2 0 0	(N(N(H(H(N(H(A))))(H(N(H(A)))))))	sp|P07357|CO8A_HUMAN	437
SPYYJVSDEISFHCYDGYTLR	5 4 1 0 2	(N(N(H(H(N(H)(F)))(H(N(F)(H(A)))))))	sp|P00751|CFAB_HUMAN	122
STGKPTLYJVSLVMSDTAGTC	5 2 0 0 0	(N(N(H(H(H(H(H)))))))	sp|P0DOX6|IGM_HUMAN/sp|P01871|IGHM_HUMAN	563/440
JISDGFDGIPDNVDAALALPAHSY	5 4 2 0 1	(N(F)(N(H(H(N(H(A))))(H(N(H(A)))))))	sp|P04004|VTNC_HUMAN	242
QQQHLFGSJVTDCSGJFCLFR	6 4 1 0 1	(N(N(H(H(N(H(H))))(H(N(F)(H(A)))))))	sp|P02787|TRFE_HUMAN	637
LCDJLSTK	5 4 2 0 0	(N(N(H(H(N(H(A))))(H(N(H(A)))))))	sp|P02774|VTDB_HUMAN	288
KALQAVYSMMSWPDDVPPEGWJR	5 4 2 0 0	(N(N(H(H(N(H(A))))(H(N(H(A)))))))	sp|P00751|CFAB_HUMAN	378
STGKPTLYJVSLVMSDTAGTC	6 2 0 0 0	(N(N(H(H(H(H))(H(H))))))	sp|P0DOX6|IGM_HUMAN/sp|P01871|IGHM_HUMAN	563/440
CANLVPVPITJATLDQITGK	6 5 3 0 1	(N(N(H(H(N(F)(H(A))))(H(N(H(A)))(N(H(A)))))))	sp|P02763|A1AG1_HUMAN	33
VYLQGLIDCYLFGJSSTVLEDSK	4 3 1 0 0	(N(N(H(H)(H(N(H(A)))))))	sp|P35542|SAA4_HUMAN	94
YLGJATAIF	5 4 2 0 0	(N(N(H(H(N(H(A))))(H(N(H(A)))))))	sp|P01009|A1AT_HUMAN	271
MDGASJVTCINSR	5 4 2 0 0	(N(N(H(H(N(H(A))))(H(N(H(A)))))))	sp|P08603|CFAH_HUMAN	1029
QVLFLDTVYGJCSTHFTVK	6 2 0 0 0	(N(N(H(H(H))(H(H)(H)))))	sp|P04114|APOB_HUMAN	185
TVLTPATNHMGJVTF	5 2 0 0 0	(N(N(H(H(H(H(H)))))))	sp|P01024|CO3_HUMAN	85
QQQHLFGSJVTDCSGJFCLFR	6 5 2 0 0	(N(N(H(H(N(H(A))))(H(N(H))(N(H(A)))))))	sp|P02787|TRFE_HUMAN	630
SVQEIQATFFYFTPJKTEDTIFLR	6 5 3 0 3	(N(N(H(H(N(F)(H(A))))(H(N(F)(H(A)))(N(F)(H(A)))))))	sp|P02763|A1AG1_HUMAN/sp|P19652|A1AG2_HUMAN	72/72
YLGJATAIFFLPDEGK	6 4 1 0 0	(N(N(H(H(H))(H(N(H))(N(H(A)))))))	sp|P01009|A1AT_HUMAN	271
CGLVPVLAENYJK	5 4 2 0 1	(N(N(H(H(N(H(A))))(H(N(F)(H(A)))))))	sp|P02787|TRFE_HUMAN	432
KEDALJETR	6 5 3 0 1	(N(N(H(H(N(F)(H(A))))(H(N(H(A)))(N(H(A)))))))	sp|P10909|CLUS_HUMAN	86
QLAHQSJSTNIFFSPVSIATAFAMLSLGTK	6 5 3 0 2	(N(F)(N(H(H(N(F)(H(A))))(H(N(H(A)))(N(H(A)))))))	sp|P01009|A1AT_HUMAN	70
DIVEYYJDSJGSHVLQGR	5 4 2 0 0	(N(N(H(H(N(H(A))))(H(N(H(A)))))))	sp|P25311|ZA2G_HUMAN	112
VLJFTTK	5 4 1 0 0	(N(N(H(H(N(H)))(H(N(H(A)))))))	sp|P13671|CO6_HUMAN	324
ELNLILKJSSFQSMKENK	3 3 0 0 0	(N(N(H(H)(H(N)))))	sp|Q06520|ST2A1_HUMAN	217
FJLTETSEAEIHQSFQHLLR	7 6 3 0 1	(N(N(H(H(N(H)(F))(N(H(A))))(H(N(H(A)))(N(H(A)))))))	sp|P01011|AACT_HUMAN	106
SLGNVJFTVSAEALESQELCGTEVPSVPEHGR	4 3 1 0 0	(N(N(H(H)(H(N(H(A)))))))	sp|P01023|A2MG_HUMAN	869
QEPERJECFLQHKDDNPNLPR	5 4 2 0 0	(N(N(H(H(N(H(A))))(H(N(H(A)))))))	sp|P02768|ALBU_HUMAN	123
LDAPTNLQFVJETDSTVLVR	5 4 1 0 0	(N(N(H(H(N(H)))(H(N(H(A)))))))	sp|P02751|FINC_HUMAN	1007
HYTJSSQDVTVPCR	5 4 1 0 1	(N(F)(N(H(H(N(H)))(H(N(H(A)))))))	sp|P0DOX2|IGA2_HUMAN/sp|P01877|IGHA2_HUMAN	207/92
KQLVEIEKVVLHPJYSQVDIGLIK	4 5 1 0 2	(N(N(H(H(N(H(A))))(H(N(F))(N(F))))))	sp|P00738|HPT_HUMAN	241
QLDMLDLSJNSLASVPEGLWASLGQPNWDMR	5 4 2 0 0	(N(N(H(H(N(H(A))))(H(N(H(A)))))))	sp|P02750|A2GL_HUMAN	269
NEEYJK	6 5 2 0 1	(N(N(H(H(N(F)(H(A))))(H(N(H))(N(H(A)))))))	sp|P02763|A1AG1_HUMAN/sp|P19652|A1AG2_HUMAN	56/56
JISDGFDGIPDNVDAALALPAHSYSGR	6 5 3 0 1	(N(F)(N(H(H(N(H(A))))(H(N(H(A)))(N(H(A)))))))	sp|P04004|VTNC_HUMAN	242
LSLHRPALEDLLLGSEAJLTCTLTGLR	5 5 1 0 0	(N(N(H(H(N)(N(H)))(H(N(H(A)))))))	sp|P01876|IGHA1_HUMAN/sp|P0DOX2|IGA2_HUMAN/sp|P01877|IGHA2_HUMAN	144/246/131
SLGNVJFTVSAEALESQELCGTEVPSVPEHGRK	4 4 1 0 0	(N(N(H(H(N))(H(N(H(A)))))))	sp|P01023|A2MG_HUMAN	869
QLAHQSJSTNIFFSPVSIATAFAMLSLGTK	5 4 1 0 1	(N(F)(N(H(H(N(H)))(H(N(H(A)))))))	sp|P01009|A1AT_HUMAN	70
QLAHQSJSTNIFFSPVSIATAFA	5 4 2 0 0	(N(N(H(H(N(H(A))))(H(N(H(A)))))))	sp|P01009|A1AT_HUMAN	70
LAJLTQGEDQYYLR	6 5 4 0 0	(N(N(H(H(N(H(A))))(H(N(H(A)))(N(A)(H(A)))))))	sp|P10909|CLUS_HUMAN	374
SVQEIQATFFYFTPJKTEDTIFLR	7 6 1 0 3	(N(N(H(H(N(H)(F))(N(H)(F)))(H(N(H)(F))(N(H(A)))))))	sp|P02763|A1AG1_HUMAN/sp|P19652|A1AG2_HUMAN	72/72
HGIQYFNJNTQHSSLFMLNEVKR	6 5 3 0 1	(N(N(H(H(N(F)(H(A))))(H(N(H(A)))(N(H(A)))))))	sp|P01042|KNG1_HUMAN	169
YDFJSSMLYSTAK	5 4 1 0 0	(N(N(H(H(N(H)))(H(N(H(A)))))))	sp|P04114|APOB_HUMAN	3465
GLKFJLTETSEAEIHQSFQHLLR	7 6 3 0 0	(N(N(H(H(N(H))(N(H(A))))(H(N(H(A)))(N(H(A)))))))	sp|P01011|AACT_HUMAN	106
CANLVPVPITJATLDQITGK	5 4 2 0 0	(N(N(H(H(N(H(A))))(H(N(H(A)))))))	sp|P02763|A1AG1_HUMAN	33
AQLLQGLGFJLTER	6 5 3 0 0	(N(N(H(H(N(H(A))))(H(N(H(A)))(N(H(A)))))))	sp|P08185|CBG_HUMAN	96
ITYSIVQTJCSKENFLFLTPDCK	6 5 3 0 1	(N(N(H(H(N(F)(H(A))))(H(N(H(A)))(N(H(A)))))))	sp|P01042|KNG1_HUMAN	205
VTQJLTLIEESLTSEFIHDIDR	5 4 1 0 1	(N(F)(N(H(H(N(H)))(H(N(H(A)))))))	sp|P36955|PEDF_HUMAN	285
NEEYJK	7 5 2 0 1	(N(N(H(N)(H(H)(H))(H(N(H(A)))(N(F)(H(A)))))))	sp|P02763|A1AG1_HUMAN/sp|P19652|A1AG2_HUMAN	56/56
FSDGLESJSSTQFEVK	7 2 0 0 0	(N(N(H(H(H(H))(H(H(H)))))))	sp|P0C0L4|CO4A_HUMAN/sp|P0C0L5|CO4B_HUMAN	226/226
LAJLTQGEDQYYLR	5 4 2 0 0	(N(N(H(H(N(H(A))))(H(N(H(A)))))))	sp|P10909|CLUS_HUMAN	374
REGDHEFLEVPEAQEDVEATFPVHQPGJYSC	5 4 2 0 0	(N(N(H(H(N(H(A))))(H(N(H(A)))))))	sp|P04217|A1BG_HUMAN	179
VCQDCPLLAPLJDTR	6 5 3 0 1	(N(N(H(H(N(F)(H(A))))(H(N(H(A)))(N(H(A)))))))	sp|P02765|FETUA_HUMAN	156
SSVITLNTNAELFJQSDIVAHLLSSSSSVIDALQYK	9 2 0 0 0	(N(N(H(H(H))(H(H)(H(H(H(H))))))))	sp|P04114|APOB_HUMAN	3358
QLAHQSJSTNIFFSPVSIATAFAMLSLGTK	6 5 2 0 1	(N(F)(N(H(H(N(H(A))))(H(N(H(N(H(A)))))))))	sp|P01009|A1AT_HUMAN	70
LVLDGSDSIGASJFTGAK	5 4 2 0 0	(N(N(H(H(N(H(A))))(H(N(H(A)))))))	sp|P00751|CFAB_HUMAN	285
QJQCFYJSSYLNVQR	7 6 1 0 0	(N(N(H(H(N(H))(N(H)))(H(N(H))(N(H(A)))))))	sp|P19652|A1AG2_HUMAN	88
ADGTVNQIEGEATPVJLTEPAKLEVK	5 4 2 0 1	(N(F)(N(H(H(N(H(A))))(H(N(H(A)))))))	sp|P05090|APOD_HUMAN	98
QQQHLFGSJVTDCSGJFCLFR	6 5 3 0 0	(N(N(H(N(H(A)))(H(N(H(A))))(H(N(H(A)))))))	sp|P02787|TRFE_HUMAN	630
HJSTGCLR	6 5 1 0 1	(N(F)(N(H(H(N(H)))(H(N(H))(N(H(A)))))))	sp|P10909|CLUS_HUMAN	291
SIJTTNVMGTSLTVR	5 4 1 0 0	(N(N(H(H(N(H)))(H(N(H(A)))))))	sp|P01023|A2MG_HUMAN	410
NAHGEEKEJLTAR	5 4 2 0 0	(N(N(H(H(N(H(A))))(H(N(H(A)))))))	sp|Q06033|ITIH3_HUMAN	580
JNSPLR	6 3 2 0 1	(N(N(H(H(H)(H))(H(N(F)(H(A(A))))))))	sp|Q5VT25|MRCKA_HUMAN	43
AQLLQGLGFJLTER	6 5 2 0 0	(N(N(H(H(N(H(A))))(H(N(H))(N(H(A)))))))	sp|P08185|CBG_HUMAN	96
VDKDLQSLEDILHQVEJK	4 4 0 0 0	(N(N(H(H(N))(H(N(H))))))	sp|P02679|FIBG_HUMAN	78
LPPGLLAJFTLLR	5 4 2 0 0	(N(N(H(H(N(H(A))))(H(N(H(A)))))))	sp|P02750|A2GL_HUMAN	186
YFTPJKTEDTIFLR	6 5 3 0 1	(N(N(H(H(N(F)(H(A))))(H(N(H(A)))(N(H(A)))))))	sp|P02763|A1AG1_HUMAN/sp|P19652|A1AG2_HUMAN	72/72
QVHFFVJASDVDNVK	6 5 3 0 0	(N(N(H(H(N(H(A))))(H(N(H(A)))(N(H(A)))))))	sp|Q96IY4|CBPB2_HUMAN	73
SIVQTJCSK	6 5 3 0 1	(N(N(H(H(N(F)(H(A))))(H(N(H(A)))(N(H(A)))))))	sp|P01042|KNG1_HUMAN	205
IYSJHSALESLALIPLQAPLK	5 4 2 0 1	(N(F)(N(H(H(N(H(A))))(H(N(H(A)))))))	sp|P55058|PLTP_HUMAN	398
DTFVJASR	5 4 1 0 0	(N(N(H(H(N(H)))(H(N(H(A)))))))	sp|P05155|IC1_HUMAN	238
VLSJNSDANLELINTWVAK	6 5 3 0 1	(N(N(H(H(N(F)(H(A))))(H(N(H(A)))(N(H(A)))))))	sp|P05155|IC1_HUMAN	253
EEQFJSTFR	4 5 1 0 1	(N(F)(N(H(N)(H(N))(H(N(H(A)))))))	sp|P01859|IGHG2_HUMAN	176
LLSJCSK	5 4 2 0 0	(N(N(H(H(N(H(A))))(H(N(H(A)))))))	sp|Q9Y2L5|TPPC8_HUMAN	1340
SLGNVJFTVSAEALESQELCGTEVPSVPEHGR	6 3 0 0 0	(N(N(H(H(H)(H))(H(N(H))))))	sp|P01023|A2MG_HUMAN	869
VSJQTLSLFFTVLQDVPVR	6 5 2 0 0	(N(N(H(H(N(H(A))))(H(N(H))(N(H(A)))))))	sp|P01023|A2MG_HUMAN	1424
NVIFSPLSISTALAFLSLGAHJTTLTEILK	5 4 2 0 0	(N(N(H(H(N(H(A))))(H(N(H(A)))))))	sp|P01011|AACT_HUMAN	93
SLGNVJFTVSAEALESQELCGTEVPSVPEHGRK	4 4 1 0 0	(N(N(H(H)(N)(H(N(H(A)))))))	sp|P01023|A2MG_HUMAN	869
SVLLADVEDLIQQQISJDTVSPR	5 4 1 0 2	(N(N(H(H(N(H)(F)))(H(N(F)(H(A)))))))	sp|Q96IY4|CBPB2_HUMAN	108
LSLHRPALEDLLLGSEAJLTCTLTGLR	5 5 2 0 0	(N(N(H(N)(H(N(H(A))))(H(N(H(A)))))))	sp|P01876|IGHA1_HUMAN/sp|P0DOX2|IGA2_HUMAN/sp|P01877|IGHA2_HUMAN	144/246/131
GFGVAIVGJYTAALPTEAALR	6 5 3 0 0	(N(N(H(H(N(H(A))))(H(N(H(A)))(N(H(A)))))))	sp|Q96PD5|PGRP2_HUMAN	485
ADGTVNQIEGEATPVJLTEPAKLEVK	4 3 1 0 1	(N(F)(N(H(H)(H(N(H(A)))))))	sp|P05090|APOD_HUMAN	98
TELFSSSCPGGIMLJETGQGYQR	5 4 1 0 0	(N(N(H(H(N(H)))(H(N(H(A)))))))	sp|O95445|APOM_HUMAN	135
SVQEIQATFFYFTPJKTEDTIFLR	6 5 2 0 1	(N(N(H(H(N(F)(H(A))))(H(N(H))(N(H(A)))))))	sp|P02763|A1AG1_HUMAN/sp|P19652|A1AG2_HUMAN	72/72
GLTFQQJASSMCVPDQDTAIR	5 5 2 0 1	(N(F)(N(H(H(N(H(A))))(H(N)(N(H(A)))))))	sp|P0DOX6|IGM_HUMAN/sp|P01871|IGHM_HUMAN	332/209
VGQLQLSHJLSLVILVPQNLK	6 5 3 0 0	(N(N(H(H(N(H(A))))(H(N(H(A)))(N(H(A)))))))	sp|P05155|IC1_HUMAN	352
VPVPITJATLDR	4 7 1 0 0	(N(N(H(N)(H(N)(N))(H(N)(N(H(A)))))))	sp|P19652|A1AG2_HUMAN	33
DLQSLEDILHQVEJK	5 4 2 0 0	(N(N(H(H(N(H(A))))(H(N(H(A)))))))	sp|P02679|FIBG_HUMAN	78
VVLHPJYSQVDIGLIK	6 5 3 0 2	(N(N(H(H(N(F)(H(A))))(H(N(H(A)))(N(F)(H(A)))))))	sp|P00738|HPT_HUMAN	241
YFTPJKTEDTIFLR	7 6 3 0 0	(N(N(H(H(N(H))(N(H(A))))(H(N(H(A)))(N(H(A)))))))	sp|P02763|A1AG1_HUMAN/sp|P19652|A1AG2_HUMAN	72/72
EJGTISR	6 5 3 0 1	(N(N(H(H(N(H(A))))(H(N(H(A)))(N(F)(H(A)))))))	sp|P02763|A1AG1_HUMAN	103
VVLHPJYSQVDIGLIK	6 5 1 0 1	(N(N(H(H(N(H)(F)))(H(N(H))(N(H(A)))))))	sp|P00738|HPT_HUMAN	241
THDEILEGLNFJLTEIPEAQIHEGFQELLR	6 5 3 0 0	(N(N(H(H(N(H(A))))(H(N(H(A)))(N(H(A)))))))	sp|P01009|A1AT_HUMAN	107
JISDGFDGIPDNVDAALALPAHSYSGR	6 5 3 0 2	(N(N(H(H(N(F)(H(A))))(H(N(H(A)))(N(F)(H(A)))))))	sp|P04004|VTNC_HUMAN	242
LSLHRPALEDLLLGSEAJLTCTLTGLR	5 4 1 0 0	(N(N(H(H(H))(H(N)(N(H(A)))))))	sp|P01876|IGHA1_HUMAN/sp|P0DOX2|IGA2_HUMAN/sp|P01877|IGHA2_HUMAN	144/246/131
STGKPTLYJVSLVMSDTAGTCY	7 2 0 0 0	(N(N(H(H(H))(H(H)(H(H))))))	sp|P0DOX6|IGM_HUMAN/sp|P01871|IGHM_HUMAN	563/440
GPVPTPPDNIQVQENFJISR	6 5 3 0 0	(N(N(H(H(N(H(A))))(H(N(H(A)))(N(H(A)))))))	sp|P02760|AMBP_HUMAN	36
LVPVPITJATLDQITGK	3 3 1 0 0	(N(N(H(H(N(H(A)))))))	sp|P02763|A1AG1_HUMAN	33
TPLTAJITK	5 5 1 0 1	(N(F)(N(H(H(N)(N(H)))(H(N(H(A)))))))	sp|P0DOX2|IGA2_HUMAN/sp|P01877|IGHA2_HUMAN	320/205
TPLTAJITK	5 4 2 0 1	(N(F)(N(H(H(N(H(A))))(H(N(H(A)))))))	sp|P0DOX2|IGA2_HUMAN/sp|P01877|IGHA2_HUMAN	320/205
EHEAQSJASLDVFLGHTNVEELMK	5 4 2 0 0	(N(N(H(H(N(H(A))))(H(N(H(A)))))))	sp|P00736|C1R_HUMAN	514
FJLTETSEAEIHQSFQHLLR	6 5 3 0 1	(N(N(H(H(N(F)(H(A))))(H(N(H(A)))(N(H(A)))))))	sp|P01011|AACT_HUMAN	106
TLJQSSDELQLSMGNAMFVK	6 5 3 0 0	(N(N(H(N(H(A)))(H(N(H(A))))(H(N(H(A)))))))	sp|P01011|AACT_HUMAN	127
GCJDSDVLAVAGFALR	5 4 2 0 0	(N(N(H(H(N(H(A))))(H(N(H(A)))))))	sp|Q9UGM5|FETUB_HUMAN	37
ELHHLQEQJVSNAFLDK	6 5 3 0 1	(N(N(H(H(N(F)(H(A))))(H(N(H(A)))(N(H(A)))))))	sp|P00450|CERU_HUMAN	762
QVETIRNLVDSYMSIIJK	3 3 0 0 0	(N(N(H(H)(H(N)))))	sp|Q9UQ16|DYN3_HUMAN	674
CANLVPVPITJATLDQITGK	6 5 2 0 1	(N(N(H(H(N(H)(F)))(H(N(H(A)))(N(H(A)))))))	sp|P02763|A1AG1_HUMAN	33
LVPVPITJATLDR	7 6 3 0 1	(N(N(H(H(N(H))(N(F)(H(A))))(H(N(H(A)))(N(H(A)))))))	sp|P19652|A1AG2_HUMAN	33
MVSHHJL	5 4 1 0 0	(N(N(H(H(N(H)))(H(N(H(A)))))))	sp|P00739|HPTR_HUMAN/sp|P00738|HPT_HUMAN	126/184
NPJATSSSSQDPESLQDRGEGK	5 4 2 0 1	(N(F)(N(H(H(N(H(A))))(H(N(H(A)))))))	sp|P05155|IC1_HUMAN	25
DIENFJSTQK	5 4 2 0 0	(N(N(H(H(N(H(A))))(H(N(H(A)))))))	sp|P43652|AFAM_HUMAN	33
RNPPMGGNVVIFDTVITNQEEPYQJHSGR	5 4 2 0 1	(N(F)(N(H(H(N(H(A))))(H(N(H(A)))))))	sp|P02745|C1QA_HUMAN	146
WVSJKTEGR	5 4 2 0 0	(N(N(H(H(N(H(A))))(H(N(H(A)))))))	sp|P01008|ANT3_HUMAN	224
QLAHQSJSTNIFFSPVSIATAFAMLSLGTK	5 4 1 0 3	(N(F)(N(H(H(N(H)(F)))(H(N(F)(H(A)))))))	sp|P01009|A1AT_HUMAN	70
FSDGLESJSSTQFEVK	9 2 0 0 0	(N(N(H(H)(H(H(H(H)))(H(H(H)))))))	sp|P0C0L4|CO4A_HUMAN/sp|P0C0L5|CO4B_HUMAN	226/226
QVLFLDTVYGJCSTHFTVK	6 2 0 0 0	(N(N(H(H(H))(H(H(H))))))	sp|P04114|APOB_HUMAN	185
JISDGFDGIPDNVDAALALPAHSYSGR	8 7 1 0 0	(N(N(H(H(N(H(A))))(H(N(H(N(H(N(H(N(H))))))))))))	sp|P04004|VTNC_HUMAN	242
VCQDCPLLAPLJDTR	6 5 3 0 0	(N(N(H(H(N(H(A))))(H(N(H(A)))(N(H(A)))))))	sp|P02765|FETUA_HUMAN	156
SLTFJETYQDISELVYGAK	5 4 2 0 0	(N(N(H(H)(H(N(H(A)))(N(H(A)))))))	sp|P01008|ANT3_HUMAN	187
LAGKPTHVJVSVVMAEVDGTC	3 5 0 0 1	(N(F)(N(H(N)(H(N)(N(H))))))	sp|P01876|IGHA1_HUMAN	340
SLGNVJFTVSAEALESQELCGTEVPSVPEHGR	4 4 0 0 0	(N(N(H(H(N))(H(N(H))))))	sp|P01023|A2MG_HUMAN	869
TVLTPATNHMGJVTFTIPANR	6 2 0 0 0	(N(N(H(H)(H(H)(H)(H)))))	sp|P01024|CO3_HUMAN	85
SLGNVJFTVSAEALESQELCGTEVPSVPEHGR	6 2 0 0 0	(N(N(H(H)(H(H)(H(H))))))	sp|P01023|A2MG_HUMAN	869
TPLTAJITK	5 5 0 0 2	(N(F)(N(H(N)(H(N(H)))(H(N(H(F)))))))	sp|P0DOX2|IGA2_HUMAN/sp|P01877|IGHA2_HUMAN	320/205
LNAENJATFYFK	6 5 3 0 1	(N(F)(N(H(H(N(H(A))))(H(N(H(A)))(N(H(A)))))))	sp|P01042|KNG1_HUMAN	294
GTAGNALMDGASQLMGEJR	5 4 0 0 0	(N(N(H(H(N(H)))(H(N(H))))))	sp|P02675|FIBB_HUMAN	394
ITYSIVQTJCSK	6 5 3 0 0	(N(N(H(H(N(H(A))))(H(N(H(A)))(N(H(A)))))))	sp|P01042|KNG1_HUMAN	205
FSDGLESJSSTQFEVK	9 2 0 0 0	(N(N(H(H(H(H)))(H(H(H(H(H))))))))	sp|P0C0L4|CO4A_HUMAN/sp|P0C0L5|CO4B_HUMAN	226/226
NEEYJK	6 5 3 0 2	(N(N(H(H(N(F)(H(A))))(H(N(H(A)))(N(F)(H(A)))))))	sp|P02763|A1AG1_HUMAN/sp|P19652|A1AG2_HUMAN	56/56
EEQYJSTYR	4 5 1 0 1	(N(F)(N(H(N)(H(N))(H(N(H(A)))))))	sp|P0DOX5|IGG1_HUMAN/sp|P01857|IGHG1_HUMAN	299/180
YKJNSDISSTR	6 5 1 0 1	(N(F)(N(H(N)(H(N(H(H))))(H(N(H(A)))))))	sp|P01871|IGHM_HUMAN	46
QLAHQSJSTNIFFSPVSIATAF	6 5 3 0 1	(N(N(H(H(N(F)(H(A))))(H(N(H(A)))(N(H(A)))))))	sp|P01009|A1AT_HUMAN	70
MLJTSSLLEQLNEQFNWVSR	6 5 3 0 0	(N(N(H(H(N(H(A))))(H(N(H(A)))(N(H(A)))))))	sp|P10909|CLUS_HUMAN	354
LPTQJITFQTESSVAEQEAEFQSPK	6 5 3 0 1	(N(F)(N(H(H(N(H(A))))(H(N(H(A)))(N(H(A)))))))	sp|Q14624|ITIH4_HUMAN	517
ELHHLQEQJVSNAFLDKGEFYIGSK	4 5 1 0 2	(N(N(H(H(N(H(A))))(H(N(F))(N(F))))))	sp|P00450|CERU_HUMAN	762
QJQCFYJSSYLNVQR	7 6 2 0 1	(N(N(H(H(N(H))(N(H(A))))(H(N(H)(F))(N(H(A)))))))	sp|P19652|A1AG2_HUMAN	93
LSLHRPALEDLLLGSEAJLTCTLTGLR	6 5 1 0 0	(N(N(H(H(N(H)))(H(N(H))(N(H(A)))))))	sp|P01876|IGHA1_HUMAN/sp|P0DOX2|IGA2_HUMAN/sp|P01877|IGHA2_HUMAN	144/246/131
JISDGFDGIPDNVDAALALPAHSYSGR	5 4 2 0 1	(N(F)(N(H(H(N(H(A))))(H(N(H(A)))))))	sp|P04004|VTNC_HUMAN	242
JTSSALYR	5 4 1 0 2	(N(N(H(H(N(H)(F)))(H(N(F)(H(A)))))))	sp|Q8IZF2|AGRF5_HUMAN	188
FJLTETSEAEIHQSFQHLLR	7 6 3 0 1	(N(N(H(H(N(H))(N(F)(H(A))))(H(N(H(A)))(N(H(A)))))))	sp|P01011|AACT_HUMAN	106
VYKPSAGJNSLYR	5 4 2 0 0	(N(N(H(H(N(H(A))))(H(N(H(A)))))))	sp|P02749|APOH_HUMAN	162
VDKDLQSLEDILHQVEJK	5 4 2 0 1	(N(F)(N(H(H(N(H(A))))(H(N(H(A)))))))	sp|P02679|FIBG_HUMAN	78
DLQSLEDILHQVEJK	4 4 1 0 0	(N(N(H(H(N))(H(N(H(A)))))))	sp|P02679|FIBG_HUMAN	78
GLVPVLAENYJK	7 6 2 0 3	(N(N(H(H(N(H)(F))(N(H(A))))(H(N(H)(F))(N(F)(H(A)))))))	sp|P02787|TRFE_HUMAN	432
FEVDSPVYJATWSASLK	6 5 3 0 1	(N(N(H(H(N(F)(H(A))))(H(N(H(A)))(N(H(A)))))))	sp|P04114|APOB_HUMAN	3895
VSJQTLSLFF	5 4 2 0 0	(N(N(H(H(N(H(A))))(H(N(H(A)))))))	sp|P01023|A2MG_HUMAN	1424
PALEDLLLGSEAJLTCTLTGLR	5 5 1 0 1	(N(N(H(N)(H(N(H)(F)))(H(N(H(A)))))))	sp|P01876|IGHA1_HUMAN/sp|P0DOX2|IGA2_HUMAN/sp|P01877|IGHA2_HUMAN	144/246/131
LPTQJITFQTESSVAEQEAEFQSPK	5 4 2 0 1	(N(N(H(H(N(H(A))))(H(N(F)(H(A)))))))	sp|Q14624|ITIH4_HUMAN	517
AGAFLGLTNVAVMJLSGNCLR	9 2 0 0 0	(N(N(H(H)(H(H(H(H)))(H(H(H)))))))	sp|P35858|ALS_HUMAN	368
ADTHDEILEGLNFJLTEIPEAQIHEGFQELLR	5 4 2 0 2	(N(N(H(H(N(F)(H(A))))(H(N(F)(H(A)))))))	sp|P01009|A1AT_HUMAN	107
MVSHHJLTTGATLINEQWLLTTAK	6 5 2 0 2	(N(N(H(H(N(F)(H(A))))(H(N(H)(F))(N(H(A)))))))	sp|P00739|HPTR_HUMAN/sp|P00738|HPT_HUMAN	126/184
IYLVLDGSDSIGASJFTGAK	5 4 2 0 0	(N(N(H(H(N(H(A))))(H(N(H(A)))))))	sp|P00751|CFAB_HUMAN	285
VLSJNSDANLELINTWVAK	6 5 3 0 1	(N(F)(N(H(H(N(H(A))))(H(N(H(A)))(N(H(A)))))))	sp|P05155|IC1_HUMAN	253
MLFVEPILEVSSLPTTJSTTNSATK	6 5 3 0 0	(N(N(H(H(N(H(A))))(H(N(H(A)))(N(H(A)))))))	sp|P05155|IC1_HUMAN	69
ITYSIVQTJCSK	6 5 3 0 1	(N(N(H(H(N(F)(H(A))))(H(N(H(A)))(N(H(A)))))))	sp|P01042|KNG1_HUMAN	205
LSLHRPALEDLLLGSEAJLTCTLTGLR	5 4 0 0 0	(N(N(H(H(N))(H(H)(H)(N)))))	sp|P01876|IGHA1_HUMAN/sp|P0DOX2|IGA2_HUMAN/sp|P01877|IGHA2_HUMAN	144/246/131
NJATVHEQVGGPSLTSDLQAQSK	5 4 2 0 0	(N(N(H(H(N(H(A))))(H(N(H(A)))))))	sp|P04004|VTNC_HUMAN	86
NPJATSSSSQDPESLQDR	6 5 3 0 0	(N(N(H(H(N(H(A))))(H(N(H(A)))(N(H(A)))))))	sp|P05155|IC1_HUMAN	25
FSDGLESJSSTQFEVK	9 2 0 0 0	(N(N(H(H)(H(H)(H(H(H(H(H)))))))))	sp|P0C0L4|CO4A_HUMAN/sp|P0C0L5|CO4B_HUMAN	226/226
PALEDLLLGSEAJLTCTLTGLR	5 4 1 0 1	(N(N(H(H(N(H)(F)))(H(N(H(A)))))))	sp|P01876|IGHA1_HUMAN/sp|P0DOX2|IGA2_HUMAN/sp|P01877|IGHA2_HUMAN	144/246/131
LATALSLSNKFVEGSHJSTVSLTTK	5 3 1 0 0	(N(N(H(H(H))(H(N(H(A)))))))	sp|P04114|APOB_HUMAN	3411
LAGKPTHVJVSVVMAEVDGTCY	5 4 1 0 1	(N(F)(N(H(H(N(H)))(H(N(H(A)))))))	sp|P01876|IGHA1_HUMAN	340
FSLLGHASISCTVEJETIGVWRPSPPTCEK	6 5 3 0 0	(N(N(H(H(N(H(A))))(H(N(H(A)))(N(H(A)))))))	sp|P04003|C4BPA_HUMAN	221
LSDLSIJSTECLHVHCR	5 4 2 0 1	(N(F)(N(H(H(N(H(A))))(H(N(H(A)))))))	sp|P05156|CFAI_HUMAN	177
TLYETEVFSTDFSJISAAK	6 5 3 0 0	(N(N(H(N(H(A)))(H(N(H(A))))(H(N(H(A)))))))	sp|P05543|THBG_HUMAN	165
SLJATELDPCPLSPELLGLTK	5 4 2 0 0	(N(N(H(H(N(H(A))))(H(N(H(A)))))))	sp|Q96PD5|PGRP2_HUMAN	77
ADTHDEILEGLNFJLTEIPEAQIHEGFQELL	5 4 2 0 0	(N(N(H(H(N(H(A))))(H(N(H(A)))))))	sp|P01009|A1AT_HUMAN	107
AVLQLNEEGVDTAGSTGVTLJLTSKPIILR	6 5 3 0 0	(N(N(H(H(N(H(A))))(H(N(H(A)))(N(H(A)))))))	sp|P08185|CBG_HUMAN	369
LSLHRPALEDLLLGSEAJLTCTLTGLR	5 5 0 0 0	(N(N(H(H(N))(H(N(H))(N(H))))))	sp|P01876|IGHA1_HUMAN/sp|P0DOX2|IGA2_HUMAN/sp|P01877|IGHA2_HUMAN	144/246/131
ADTHDEILEGLNFJLTEIPEAQIHEGFQELLR	4 3 1 0 0	(N(N(H(H)(H(N(H(A)))))))	sp|P01009|A1AT_HUMAN	107
TFSSMTCASGAJVSEQLSLK	5 4 2 0 0	(N(N(H(H(N(H(A))))(H(N(H(A)))))))	sp|P20742|PZP_HUMAN	932
NJATVHEQVGGPSLTSDLQAQSK	6 5 3 0 0	(N(N(H(H(N(H(A))))(H(N(H(A)))(N(H(A)))))))	sp|P04004|VTNC_HUMAN	86
LVPVPITJATLDR	7 6 3 0 0	(N(N(H(H(N(H))(N(H(A))))(H(N(H(A)))(N(H(A)))))))	sp|P19652|A1AG2_HUMAN	33
EEQFJSTFR	4 4 1 0 1	(N(F)(N(H(H(N))(H(N(H(A)))))))	sp|P01859|IGHG2_HUMAN	176
YKJNSDISSTR	5 4 2 0 1	(N(F)(N(H(H(N(H(A))))(H(N(H(A)))))))	sp|P01871|IGHM_HUMAN	46
CJYSIR	5 4 1 0 0	(N(N(H(H(N(H)))(H(N(H(A)))))))	sp|P00736|C1R_HUMAN	221
MDGASJVTCINSR	5 4 1 0 0	(N(N(H(H(N(H)))(H(N(H(A)))))))	sp|P08603|CFAH_HUMAN	1029
AQNJGSNFQLEEISR	5 4 2 0 0	(N(N(H(H(N(H(A))))(H(N(H(A)))))))	sp|P02765|FETUA_HUMAN	176
QLAHQSJSTNIFFSPVSIATAFAMLSLGTK	6 4 1 0 1	(N(N(H(H(N(H(H))))(H(N(F)(H(A)))))))	sp|P01009|A1AT_HUMAN	70
MLJTSSLLEQLNEQFNWVSR	6 5 1 0 0	(N(N(H(H(N(H(A))))(H(N(H))(N(H))))))	sp|P10909|CLUS_HUMAN	354
LAJLTQGEDQYYLR	5 4 2 0 1	(N(N(H(H(N(H(A))))(H(N(F)(H(A)))))))	sp|P10909|CLUS_HUMAN	374
LPTQJITFQTESSVAEQEAEFQSPK	6 5 3 0 1	(N(N(H(H(N(F)(H(A))))(H(N(H(A)))(N(H(A)))))))	sp|Q14624|ITIH4_HUMAN	517
STGKPTLYJVSLVMSDTAGTCY	7 2 0 0 0	(N(N(H(H(H)(H))(H(H)(H)))))	sp|P0DOX6|IGM_HUMAN/sp|P01871|IGHM_HUMAN	563/440
VVLHPJYSQVDIGLIK	6 5 2 0 1	(N(N(H(H(N(H)(F)))(H(N(H(A)))(N(H(A)))))))	sp|P00738|HPT_HUMAN	241
EEQFJSTFR	5 5 0 0 1	(N(F)(N(H(N)(H(N(H)))(H(N(H))))))	sp|P01859|IGHG2_HUMAN	176
EEQFJSTYR	4 4 1 0 1	(N(F)(N(H(H(N))(H(N(H(A)))))))	sp|P01861|IGHG4_HUMAN	177
ADTHDEILEGLNFJLTEIPEAQIHEGFQELLR	6 4 2 0 0	(N(N(H(H(H))(H(N(H(A)))(N(H(A)))))))	sp|P01009|A1AT_HUMAN	107
STGKPTLYJVSLVMSDTAGTC	6 2 0 0 0	(N(N(H(H(H(H(H(H))))))))	sp|P0DOX6|IGM_HUMAN/sp|P01871|IGHM_HUMAN	563/440
KYNSQJQSNNQFVLYR	5 4 2 0 0	(N(N(H(H(N(H(A))))(H(N(H(A)))))))	sp|P01042|KNG1_HUMAN	48
LVPVPITJATLDQITGK	6 5 2 0 1	(N(N(H(H(N(F)(H(A))))(H(N(H))(N(H(A)))))))	sp|P02763|A1AG1_HUMAN	33
GCVLLSYLJETVTVSASLESVR	5 5 1 0 2	(N(F)(N(H(H(N(H(A))))(H(N)(N(H)(F))))))	sp|P01023|A2MG_HUMAN	55
PALEDLLLGSEAJLTCTLTGLR	5 5 2 0 1	(N(F)(N(H(N)(H(N(H(A))))(H(N(H(A)))))))	sp|P01876|IGHA1_HUMAN/sp|P0DOX2|IGA2_HUMAN/sp|P01877|IGHA2_HUMAN	144/246/131
QDQCIYJTTYLNVQR	9 8 1 0 2	(N(F)(N(H(N)(H(N(H)(F))(N(H(H))))(H(N(H))(N(H(N(H(A)))))))))	sp|P02763|A1AG1_HUMAN	93
PALEDLLLGSEAJLTCTLTGLR	3 5 0 0 0	(N(N(H(N)(H(N)(N(H))))))	sp|P01876|IGHA1_HUMAN/sp|P0DOX2|IGA2_HUMAN/sp|P01877|IGHA2_HUMAN	144/246/131
STGKPTLYJVSLVMSDTAGTCY	9 2 0 0 0	(N(N(H(H(H)(H))(H(H)(H(H(H)))))))	sp|P0DOX6|IGM_HUMAN/sp|P01871|IGHM_HUMAN	563/440
ELHHLQEQJVSNAFLDKGEFYIGSK	6 5 3 0 2	(N(N(H(H(N(F)(H(A))))(H(N(H(A)))(N(F)(H(A)))))))	sp|P00450|CERU_HUMAN	762
YFTPJKTEDTIFLR	7 6 3 0 1	(N(N(H(H(N(H)(F))(N(H(A))))(H(N(H(A)))(N(H(A)))))))	sp|P02763|A1AG1_HUMAN/sp|P19652|A1AG2_HUMAN	72/72
JISDGFDGIPDNVDAALALPAHSY	6 5 3 0 1	(N(N(H(H(N(F)(H(A))))(H(N(H(A)))(N(H(A)))))))	sp|P04004|VTNC_HUMAN	242
QDQCIYJTTYLNVQR	5 4 3 0 3	(N(F)(N(H(H(N(F)(H(A))))(H(N(F)(H(A(A))))))))	sp|P02763|A1AG1_HUMAN	93
YLGJATAIFFLPDEGK	5 4 1 0 1	(N(N(H(H(N(H)))(H(N(F)(H(A)))))))	sp|P01009|A1AT_HUMAN	271
DKICDLLVANNHFAHFFAPQJLTNMNK	5 4 1 0 2	(N(N(H(H(N(H)(F)))(H(N(F)(H(A)))))))	sp|P19827|ITIH1_HUMAN	285
LPTQJITFQTESSVAEQEAEFQSPK	6 5 2 0 0	(N(N(H(H(N(H(A))))(H(N(H))(N(H(A)))))))	sp|Q14624|ITIH4_HUMAN	517
QDQCIYJTTYLNVQR	8 7 4 0 0	(N(N(H(H(N(H(A)))(N(H(A))))(H(N(H(A)))(N(H(N(H(A)))))))))	sp|P02763|A1AG1_HUMAN	93
EJLTAPGSDSAVFFEQGTTR	6 4 1 0 1	(N(N(H(H(N(H(H))))(H(N(F)(H(A)))))))	sp|P00450|CERU_HUMAN	397
ADTHDEILEGLNFJLTEIPEAQIH	5 4 2 0 0	(N(N(H(H(N(H(A))))(H(N(H(A)))))))	sp|P01009|A1AT_HUMAN	107
GLTFQQJASSMCVPDQDTAIR	4 5 1 0 1	(N(N(H(N)(H(N(F)))(H(N(H(A)))))))	sp|P0DOX6|IGM_HUMAN/sp|P01871|IGHM_HUMAN	332/209
SWPAVGJ	5 4 2 0 0	(N(N(H(H(N(H(A))))(H(N(H(A)))))))	sp|P02790|HEMO_HUMAN	187
TLJQSSDELQLSMGNAMFVK	6 5 1 0 0	(N(N(H(H(N(H(A))))(H(N(H))(N(H))))))	sp|P01011|AACT_HUMAN	127
SLGNVJFTVSAEALESQELCGTEVPSVPEHGR	6 2 0 0 0	(N(N(H(H)(H(H(H(H)))))))	sp|P01023|A2MG_HUMAN	869
ADTHDEILEGLNFJLTEIPEAQ	5 4 2 0 0	(N(N(H(H(N(H(A))))(H(N(H(A)))))))	sp|P01009|A1AT_HUMAN	107
DIVEYYJDSJGSHVLQGR	6 5 3 0 0	(N(N(H(H(N(H(A))))(H(N(H(A)))(N(H(A)))))))	sp|P25311|ZA2G_HUMAN	112
SLTFJETYQDISELVYGAK	5 4 1 0 1	(N(N(H(H(N(H)(F)))(H(N(H(A)))))))	sp|P01008|ANT3_HUMAN	187
JGSLFAFR	5 4 1 0 0	(N(N(H(H(N(H)))(H(N(H(A)))))))	sp|P04004|VTNC_HUMAN	169
AVLQLNEEGVDTAGSTGVTLJLTSKPIILR	5 4 2 0 0	(N(N(H(H(N(H(A))))(H(N(H(A)))))))	sp|P08185|CBG_HUMAN	369
VVLHPJYSQVDIGLIK	5 4 1 0 0	(N(N(H(H)(H(N(H))(N(H(A)))))))	sp|P00738|HPT_HUMAN	241
GHVJITR	4 3 0 0 0	(N(N(H(H(H))(H(N)))))	sp|P00734|THRB_HUMAN	121
QQQHLFGSJVTDCSGJFCLFR	7 5 2 0 1	(N(N(H(N)(H(H)(H))(H(N(H(A)))(N(F)(H(A)))))))	sp|P02787|TRFE_HUMAN	630
ALPQPQJVTSLLGCTH	6 4 1 0 1	(N(N(H(H(N(H(H))))(H(N(F)(H(A)))))))	sp|P02790|HEMO_HUMAN	453
AALAAFNAQNJGSNFQLEEISR	5 4 1 0 1	(N(F)(N(H(H(N(H)))(H(N(H(A)))))))	sp|P02765|FETUA_HUMAN	176
CMWSSALNSLJLSFAGLEQVPK	9 2 0 0 0	(N(N(H(H(H(H))(H(H(H(H(H)))))))))	sp|P08571|CD14_HUMAN	282
STGKPTLYJVSLVMSDTAGTC	6 2 0 0 0	(N(N(H(H(H))(H(H)(H)))))	sp|P0DOX6|IGM_HUMAN/sp|P01871|IGHM_HUMAN	563/440
MVSHHJLTTGATLINEQWLLTTAK	6 5 2 0 1	(N(N(H(H(N(H)(F)))(H(N(H(A)))(N(H(A)))))))	sp|P00739|HPTR_HUMAN/sp|P00738|HPT_HUMAN	126/184
MLJTSSLLEQLNEQFNWVSR	5 4 1 0 0	(N(N(H(H(N(H)))(H(N(H(A)))))))	sp|P10909|CLUS_HUMAN	354
TLJQSSDELQLSMGNAMFVK	7 6 1 0 0	(N(N(H(H(N(H))(N(H)))(H(N(H))(N(H(A)))))))	sp|P01011|AACT_HUMAN	127
VIDFJCTTSSVSSALANTK	5 4 1 0 0	(N(N(H(H(H))(H(N)(N(H(A)))))))	sp|P04196|HRG_HUMAN	125
FYFTPJKTEDTIFLR	6 5 3 0 1	(N(N(H(H(N(F)(H(A))))(H(N(H(A)))(N(H(A)))))))	sp|P02763|A1AG1_HUMAN/sp|P19652|A1AG2_HUMAN	72/72
AGLQAFFQVQECJK	5 4 2 0 1	(N(F)(N(H(H(N(H(A))))(H(N(H(A)))))))	sp|P00450|CERU_HUMAN	358
QJQCFYJSSYLNVQR	7 6 4 0 1	(N(F)(N(H(H(N(H(A(N(H(A)))))))(H(N(H(A(N(H(A))))))))))	sp|P19652|A1AG2_HUMAN	88
EQFCPPPPQIPNAQJMTTTVNYQDGEK	5 4 2 0 0	(N(N(H(H(N(H(A))))(H(N(H(A)))))))	sp|Q9BXR6|FHR5_HUMAN	400
KKEDALJETR	5 4 2 0 0	(N(N(H(H(N(H(A))))(H(N(H(A)))))))	sp|P10909|CLUS_HUMAN	86
SLGNVJFTVSAEALESQELCGTEVPSVPEHGR	6 2 0 0 0	(N(N(H(H(H(H(H(H))))))))	sp|P01023|A2MG_HUMAN	869
LSLHRPALEDLLLGSEAJLTCTLTGLR	5 3 1 0 0	(N(N(H(H(H))(H(N(H(A)))))))	sp|P01876|IGHA1_HUMAN/sp|P0DOX2|IGA2_HUMAN/sp|P01877|IGHA2_HUMAN	144/246/131
STGKPTLYJVSLVMSDTAGTC	6 2 0 0 0	(N(N(H(H(H))(H(H(H))))))	sp|P0DOX6|IGM_HUMAN/sp|P01871|IGHM_HUMAN	563/440
AALAAFNAQNJGSNFQLEEISR	6 5 2 0 1	(N(N(H(H(N(H)(F)))(H(N(H(A)))(N(H(A)))))))	sp|P02765|FETUA_HUMAN	176
TVLTPATNHMGJVTF	6 2 0 0 0	(N(N(H(H)(H(H)(H(H))))))	sp|P01024|CO3_HUMAN	85
AJISHK	5 4 2 0 1	(N(F)(N(H(H(N(H(A))))(H(N(H(A)))))))	sp|Q14940|SL9A5_HUMAN/sp|P01031|CO5_HUMAN/sp|P19634|SL9A1_HUMAN	319/741/370
HJLTTGATLINEQWLLTTAK	5 4 2 0 0	(N(N(H(H(N(H(A))))(H(N(H(A)))))))	sp|P00739|HPTR_HUMAN/sp|P00738|HPT_HUMAN	126/184
ALPQPQJVTSLLGCTH	4 3 1 0 0	(N(N(H(H)(H(N(H(A)))))))	sp|P02790|HEMO_HUMAN	453
IIEGEPNLKVPGJVTAVLGETLK	5 4 2 0 0	(N(N(H(H(N(H(A))))(H(N(H(A)))))))	sp|P01833|PIGR_HUMAN	469
VDKDLQSLEDILHQVEJK	5 4 1 0 1	(N(N(H(H(N(H)))(H(N(F)(H(A)))))))	sp|P02679|FIBG_HUMAN	78
LQAPLJYTEFQKPICLPSK	5 4 2 0 1	(N(F)(N(H(H(N(H(A))))(H(N(H(A)))))))	sp|P03952|KLKB1_HUMAN	494
FJLTEIPEAQIHEGFQELLR	6 5 3 0 0	(N(N(H(H(N(H(A))))(H(N(H(A)))(N(H(A)))))))	sp|P01009|A1AT_HUMAN	107
KEDALJETR	6 5 3 0 0	(N(N(H(H(N(H(A))))(H(N(H(A)))(N(H(A)))))))	sp|P10909|CLUS_HUMAN	86
VVLHPJYSQVDIGLIK	8 6 2 0 3	(N(N(H(H(N(H))(N(F)(H(H))))(H(N(F)(H(A)))(N(F)(H(A)))))))	sp|P00738|HPT_HUMAN	241
AALAAFNAQNJGSNFQLEEISR	5 4 2 0 1	(N(F)(N(H(H(N(H(A))))(H(N(H(A)))))))	sp|P02765|FETUA_HUMAN	176
STGKPTLYJVSLVMSDTAGTC	8 2 0 0 0	(N(N(H(H(H))(H(H)(H(H(H)))))))	sp|P0DOX6|IGM_HUMAN/sp|P01871|IGHM_HUMAN	563/440
QLAHQSJ	5 4 2 0 0	(N(N(H(H(N(H(A))))(H(N(H(A)))))))	sp|P01009|A1AT_HUMAN	70
QJQCFYJSSYLNVQR	7 6 2 0 0	(N(N(H(H(N(H))(N(H(A))))(H(N(H))(N(H(A)))))))	sp|P19652|A1AG2_HUMAN	88
QQQHLFGSJVTDCSGJFCLFR	6 4 1 0 2	(N(N(H(H(H))(H(N(H)(F))(N(F)(H(A)))))))	sp|P02787|TRFE_HUMAN	630
VSJQTLSLFFTVLQDVPVR	5 5 0 0 1	(N(F)(N(H(H(N(H)))(H(N)(N(H))))))	sp|P01023|A2MG_HUMAN	1424
IDSTGJVTNELR	5 2 0 0 0	(N(N(H(H)(H(H)(H)))))	sp|O75882|ATRN_HUMAN	416
AFITJFSMIIDGMTYPGIIK	5 4 2 0 1	(N(N(H(H(N(H(A))))(H(N(F)(H(A)))))))	sp|Q14624|ITIH4_HUMAN	81
YLGJATAIFFLPDEGK	6 4 2 0 0	(N(N(H(H(H))(H(N(H(A)))(N(H(A)))))))	sp|P01009|A1AT_HUMAN	271
HJFSHCCSK	5 4 2 0 0	(N(N(H(H(N(H(A))))(H(N(H(A)))))))	sp|P43652|AFAM_HUMAN	109
SYJQTK	5 4 2 0 0	(N(N(H(H(N(H(A))))(H(N(H(A)))))))	sp|Q8IYA6|CKP2L_HUMAN	215
NEEYJK	5 4 2 0 1	(N(N(H(H(N(H(A))))(H(N(F)(H(A)))))))	sp|P02763|A1AG1_HUMAN/sp|P19652|A1AG2_HUMAN	56/56
TVLTPATNHMGJVTFTIPANR	6 2 0 0 0	(N(N(H(H)(H(H)(H(H))))))	sp|P01024|CO3_HUMAN	85
PALEDLLLGSEAJLTCTLTGLR	3 5 0 0 0	(N(N(H(N)(H(N))(H(N)))))	sp|P01876|IGHA1_HUMAN/sp|P0DOX2|IGA2_HUMAN/sp|P01877|IGHA2_HUMAN	144/246/131
JLTTGATLINEQWLLTTAK	5 4 2 0 0	(N(N(H(H(N(H(A))))(H(N(H(A)))))))	sp|P00739|HPTR_HUMAN/sp|P00738|HPT_HUMAN	126/184
AVLQLNEEGVDTAGSTGVTLJLTSKPIILR	6 5 3 0 1	(N(N(H(H(N(F)(H(A))))(H(N(H(A)))(N(H(A)))))))	sp|P08185|CBG_HUMAN	369
QLAHQSJSTNIFFSPVSIATAFAMLSLGTK	5 4 1 0 2	(N(F)(N(H(H(N(H)))(H(N(F)(H(A)))))))	sp|P01009|A1AT_HUMAN	70
VDKDLQSLEDILHQVEJK	5 5 1 0 0	(N(N(H(H(N)(N(H)))(H(N(H(A)))))))	sp|P02679|FIBG_HUMAN	78
STGKPTLYJVSLVMSDTAGTCY	7 2 0 0 0	(N(N(H(H(H(H)))(H(H(H))))))	sp|P0DOX6|IGM_HUMAN/sp|P01871|IGHM_HUMAN	563/440
AFITJFSMIIDGMTYPGIIK	6 5 3 0 0	(N(N(H(H(N(H(A))))(H(N(H(A)))(N(H(A)))))))	sp|Q14624|ITIH4_HUMAN	81
GCVLLSYLJETVTVSASLESVR	6 5 1 0 1	(N(F)(N(H(H(N(H(A))))(H(H(N))(H(N))))))	sp|P01023|A2MG_HUMAN	55
QQQHLFGSJVTDCSGJFCLFR	5 4 1 0 3	(N(N(H(H(N(F)(H(A))))(H(N(F)(H(F)))))))	sp|P02787|TRFE_HUMAN	630
QDQCIYJTTYLNVQR	7 6 4 0 2	(N(N(H(H(N(H(A)))(N(F)(H(A))))(H(N(H(A)))(N(F)(H(A)))))))	sp|P02763|A1AG1_HUMAN	93
LAGKPTHVJVSVVMAEVDGTCY	4 5 1 0 1	(N(F)(N(H(N)(H(N))(H(N(H(A)))))))	sp|P01876|IGHA1_HUMAN	340
VDKDLQSLEDILHQVEJK	4 3 0 0 0	(N(N(H(H)(H(N(H))))))	sp|P02679|FIBG_HUMAN	78
HGVIISSTVDTYEJGSSVEYR	5 4 2 0 0	(N(N(H(H(N(H(A))))(H(N(H(A)))))))	sp|P05160|F13B_HUMAN	545
STGKPTLYJVSLVMSDTAGTCY	7 2 0 0 0	(N(N(H(H(H(H))(H(H(H)))))))	sp|P0DOX6|IGM_HUMAN/sp|P01871|IGHM_HUMAN	563/440
YLETLKTLKDVLJDSENK	4 3 0 0 0	(N(N(H(H)(H(N(H))))))	sp|P46939|UTRO_HUMAN	924
KLPPGLLAJFTLLR	5 4 2 0 0	(N(N(H(H(N(H(A))))(H(N(H(A)))))))	sp|P02750|A2GL_HUMAN	186
HJSTGCLR	6 5 2 0 0	(N(N(H(H(N(H(A))))(H(N(H))(N(H(A)))))))	sp|P10909|CLUS_HUMAN	291
LVPVPITJATLDR	6 5 3 0 2	(N(N(H(H(N(F)(H(A))))(H(N(H(A)))(N(F)(H(A)))))))	sp|P19652|A1AG2_HUMAN	33
EJISDPTSPLR	5 5 1 0 0	(N(N(H(N)(H(N(H)))(H(N(H(A)))))))	sp|P01591|IGJ_HUMAN	71
EJISDPTSPLR	5 4 2 0 0	(N(N(H(H(N(H(A))))(H(N(H(A)))))))	sp|P01591|IGJ_HUMAN	71
GLVPVLAENYJK	5 4 2 0 0	(N(N(H(H(N(H(A))))(H(N(H(A)))))))	sp|P02787|TRFE_HUMAN	432
EJETELIK	5 4 2 0 0	(N(N(H(H(N(H(A))))(H(N(H(A)))))))	sp|Q9Y2G3|AT11B_HUMAN	477
QJQCFYJSSYLNVQR	7 6 4 0 0	(N(N(H(H(N(H(A)))(N(H(A))))(H(N(H(A)))(N(H(A)))))))	sp|P19652|A1AG2_HUMAN	93
AVJITSENLIDDVVSLIR	5 4 1 0 0	(N(N(H(H(N(H)))(H(N(H(A)))))))	sp|P02748|CO9_HUMAN	415
VDKDLQSLEDILHQVEJK	4 3 0 0 0	(N(N(H(H(H))(H(N)))))	sp|P02679|FIBG_HUMAN	78
SLGNVJFTVSAEALESQELCGTEVPSVPEHGR	8 2 0 0 0	(N(N(H(H(H))(H(H)(H(H(H)))))))	sp|P01023|A2MG_HUMAN	869
QSVPAHFVALJGSK	6 2 0 0 0	(N(N(H(H(H))(H(H(H))))))	sp|P06681|CO2_HUMAN	621
YLGJATAIFFLPDEGK	5 4 1 0 1	(N(N(H(H(N(H)(F)))(H(N(H(A)))))))	sp|P01009|A1AT_HUMAN	271
LVPVPITJATLDQITGK	7 6 3 0 0	(N(N(H(H(N(H))(N(H(A))))(H(N(H(A)))(N(H(A)))))))	sp|P02763|A1AG1_HUMAN	33
LAJLTQGEDQYYLR	5 4 2 0 1	(N(F)(N(H(H(N(H(A))))(H(N(H(A)))))))	sp|P10909|CLUS_HUMAN	374
LAGKPTHVJVSVVMAEVDGTC	6 6 2 0 1	(N(F)(N(H(N)(H(N(H(A))))(H(N(H))(N(H(A)))))))	sp|P01876|IGHA1_HUMAN	340
STGKPTLYJVSLVMSDTAGTCY	7 2 0 0 0	(N(N(H(H)(H(H(H))(H(H))))))	sp|P0DOX6|IGM_HUMAN/sp|P01871|IGHM_HUMAN	563/440
PALEDLLLGSEAJLTCTLTGLR	4 5 1 0 0	(N(N(H(N)(H(N))(H(N(H(A)))))))	sp|P01876|IGHA1_HUMAN/sp|P0DOX2|IGA2_HUMAN/sp|P01877|IGHA2_HUMAN	144/246/131
EJLTAPGSDSAVFFEQGTTR	5 4 2 0 1	(N(F)(N(H(H(N(H(A))))(H(N(H(A)))))))	sp|P00450|CERU_HUMAN	397
LVPVPITJATLDQITGK	6 5 1 0 0	(N(N(H(H(N(H(A))))(H(N(H))(N(H))))))	sp|P02763|A1AG1_HUMAN	33
VTQJLTLIEESLTSEFIHDIDR	5 4 2 0 1	(N(F)(N(H(H(N(H(A))))(H(N(H(A)))))))	sp|P36955|PEDF_HUMAN	285
SVQEIQATFFYFTPJKTEDTIFLR	7 6 1 0 0	(N(N(H(H(N(H))(N(H)))(H(N(H))(N(H(A)))))))	sp|P02763|A1AG1_HUMAN/sp|P19652|A1AG2_HUMAN	72/72
GFLALYQTVAVJYSQPISEASR	5 4 2 0 1	(N(F)(N(H(H(N(H(A))))(H(N(H(A)))))))	sp|Q9NZP8|C1RL_HUMAN	166
GLTFQQJASSMCVPDQDTAIR	5 4 1 0 0	(N(N(H(H(N(H)))(H(N(H(A)))))))	sp|P0DOX6|IGM_HUMAN/sp|P01871|IGHM_HUMAN	332/209
STGKPTLYJVSLVMSDTAGTC	7 2 0 0 0	(N(N(H(H)(H(H(H(H(H))))))))	sp|P0DOX6|IGM_HUMAN/sp|P01871|IGHM_HUMAN	563/440
ITYSIVQTJCSK	5 4 2 0 0	(N(N(H(H(N(H(A))))(H(N(H(A)))))))	sp|P01042|KNG1_HUMAN	205
STGKPTLYJVSLVMSDTAGTCY	5 2 0 0 0	(N(N(H(H(H(H(H)))))))	sp|P0DOX6|IGM_HUMAN/sp|P01871|IGHM_HUMAN	563/440
STGKPTLYJVSLVMSDTAGTCY	7 2 0 0 0	(N(N(H(H(H))(H(H)(H)(H)))))	sp|P0DOX6|IGM_HUMAN/sp|P01871|IGHM_HUMAN	563/440
JGTAVCATNR	5 4 2 0 0	(N(N(H(H(N(H(A))))(H(N(H(A)))))))	sp|P05156|CFAI_HUMAN	70
FSDGLESJSSTQFEVK	8 2 0 0 0	(N(N(H(H(H))(H(H)(H(H(H)))))))	sp|P0C0L4|CO4A_HUMAN/sp|P0C0L5|CO4B_HUMAN	226/226
ALPQPQJVTSLLGCTH	5 4 1 0 1	(N(N(H(H(N(H)(F)))(H(N(H(A)))))))	sp|P02790|HEMO_HUMAN	453
YKJNSDISSTR	4 3 0 0 1	(N(F)(N(H(N)(H(H)(H)))))	sp|P01871|IGHM_HUMAN	46
LSLHRPALEDLLLGSEAJLTCTLTGLR	5 5 1 0 1	(N(F)(N(H(H(N)(N(H)))(H(N(H(A)))))))	sp|P01876|IGHA1_HUMAN/sp|P0DOX2|IGA2_HUMAN/sp|P01877|IGHA2_HUMAN	144/246/131
VNQNLVYESGSLJFSK	5 4 2 0 0	(N(N(H(H(N(H(A))))(H(N(H(A)))))))	sp|P04114|APOB_HUMAN	2982
SIVQTJCSK	5 4 2 0 0	(N(N(H(H)(H(N(H(A)))(N(H(A)))))))	sp|P01042|KNG1_HUMAN	205
LAGKPTHVJVSVVMAEVDGTCY	5 4 2 0 0	(N(N(H(H(N(H(A))))(H(N(H(A)))))))	sp|P01876|IGHA1_HUMAN	340
GLTFQQJASSMCVPDQDTAIR	5 5 1 0 0	(N(N(H(H(N)(N(H)))(H(N(H(A)))))))	sp|P0DOX6|IGM_HUMAN/sp|P01871|IGHM_HUMAN	332/209
ALPQPQJVTSLLGCTH	5 4 1 0 2	(N(N(H(H(N(H)(F)))(H(N(F)(H(A)))))))	sp|P02790|HEMO_HUMAN	453
LVPVPITJATLDQITGK	6 5 2 0 1	(N(F)(N(H(H(N(H(A))))(H(N(H(N(H(A)))))))))	sp|P02763|A1AG1_HUMAN	33
CSDGWSFDATTLDDJGTMLFFK	5 4 1 0 0	(N(N(H(H(N(H)))(H(N(H(A)))))))	sp|P02790|HEMO_HUMAN	64
STGKPTLYJVSLVMSDTAGTCY	6 2 0 0 0	(N(N(H(H)(H(H)(H)(H)))))	sp|P0DOX6|IGM_HUMAN/sp|P01871|IGHM_HUMAN	563/440
STGKPTLYJVSLVMSDTAGTCY	8 2 0 0 0	(N(N(H(H(H))(H(H(H))(H(H))))))	sp|P0DOX6|IGM_HUMAN/sp|P01871|IGHM_HUMAN	563/440
LVPVPITJATLDQITGK	7 5 2 0 0	(N(N(H(N)(H(H)(H))(H(N(H(A)))(N(H(A)))))))	sp|P02763|A1AG1_HUMAN	33
YKJNSDISSTR	5 5 1 0 1	(N(F)(N(H(N)(H(N(H)))(H(N(H(A)))))))	sp|P01871|IGHM_HUMAN	46
LSLLEEPGJGTFTVILNQLTSR	4 5 1 0 1	(N(F)(N(H(H(N)(N))(H(N(H(A)))))))	sp|P01833|PIGR_HUMAN	421
SWPAVGJCSSALR	6 5 2 0 0	(N(N(H(H(N(H(A))))(H(N(H))(N(H(A)))))))	sp|P02790|HEMO_HUMAN	187
FEVDSPVYJATWSASLK	6 5 3 0 0	(N(N(H(H(N(H(A))))(H(N(H(A)))(N(H(A)))))))	sp|P04114|APOB_HUMAN	3895
TVLTPATNHMGJVTF	6 2 0 0 0	(N(N(H(H)(H(H)(H)(H)))))	sp|P01024|CO3_HUMAN	85
JNSDISSTR	5 4 1 0 1	(N(F)(N(H(H(N(H)))(H(N(H(A)))))))	sp|P01871|IGHM_HUMAN	46
LPYQGJATMLVVLMEK	5 4 2 0 0	(N(N(H(H(N(H(A))))(H(N(H(A)))))))	sp|Q9UK55|ZPI_HUMAN	295
LAGKPTHVJVSVVMAEVDGTC	5 4 2 0 1	(N(N(H(H(N(H(A))))(H(N(F)(H(A)))))))	sp|P01876|IGHA1_HUMAN	340
KKEDALJETR	6 5 3 0 1	(N(N(H(H(N(F)(H(A))))(H(N(H(A)))(N(H(A)))))))	sp|P10909|CLUS_HUMAN	86
FSDGLESJSSTQFEVK	9 2 0 0 0	(N(N(H(H(H)(H(H)))(H(H)(H(H))))))	sp|P0C0L4|CO4A_HUMAN/sp|P0C0L5|CO4B_HUMAN	226/226
PALEDLLLGSEAJLTCTLTGLR	5 5 2 0 0	(N(N(H(H(N(H(A))))(H(N)(N(H(A)))))))	sp|P01876|IGHA1_HUMAN/sp|P0DOX2|IGA2_HUMAN/sp|P01877|IGHA2_HUMAN	144/246/131
SLGNVJFTVSAEALESQELCGTEVPSVPEHGR	4 2 0 0 0	(N(N(H(H(H)(H)))))	sp|P01023|A2MG_HUMAN	869
JGSLFAFR	5 3 1 0 0	(N(N(H(H(H))(H(N(H(A)))))))	sp|P04004|VTNC_HUMAN	169
LSLHRPALEDLLLGSEAJLTCTLTGLR	5 4 0 0 0	(N(N(H(H(N(H)))(H(N(H))))))	sp|P01876|IGHA1_HUMAN/sp|P0DOX2|IGA2_HUMAN/sp|P01877|IGHA2_HUMAN	144/246/131
QDQCIYJTTYLNVQR	6 5 3 0 3	(N(N(H(H(N(F)(H(A))))(H(N(F)(H(A)))(N(F)(H(A)))))))	sp|P02763|A1AG1_HUMAN	93
JISDGFDGIPDNVDAALALPAH	5 4 2 0 0	(N(N(H(H(N(H(A))))(H(N(H(A)))))))	sp|P04004|VTNC_HUMAN	242
PALEDLLLGSEAJLTCTLTGLR	6 2 0 0 0	(N(N(H(H(H(H(H(H))))))))	sp|P01876|IGHA1_HUMAN/sp|P0DOX2|IGA2_HUMAN/sp|P01877|IGHA2_HUMAN	144/246/131
IYSGILJLSDITK	5 4 2 0 0	(N(N(H(H(N(H(A))))(H(N(H(A)))))))	sp|P03952|KLKB1_HUMAN	453
LVPVPITJATLDQITGK	7 6 2 0 1	(N(N(H(H(N(H))(N(H)(F)))(H(N(H(A)))(N(H(A)))))))	sp|P02763|A1AG1_HUMAN	33
ADGTVNQIEGEATPVJLTEPAK	6 5 2 0 1	(N(F)(N(H(H(N(H(A))))(H(N(H(N(H(A)))))))))	sp|P05090|APOD_HUMAN	98
GLTFQQJASSMCVPDQDTAIR	6 5 2 0 1	(N(F)(N(H(H(N(H(A))))(H(N(H(N(H(A)))))))))	sp|P0DOX6|IGM_HUMAN/sp|P01871|IGHM_HUMAN	332/209
GAFISJFSMTVDGK	5 4 2 0 0	(N(N(H(H(N(H(A))))(H(N(H(A)))))))	sp|P19823|ITIH2_HUMAN	118
NTGNQDSKQGEQETKJR	5 4 2 0 0	(N(N(H(H(N(H(A))))(H(N(H(A)))))))	sp|Q5SQI0|ATAT_HUMAN	363
NPJATSSSSQDPESLQDR	6 5 3 0 0	(N(N(H(N(H(A)))(H(N(H(A))))(H(N(H(A)))))))	sp|P05155|IC1_HUMAN	25
MVSHHJLTTGATLINEQWLLTTAK	6 5 1 0 0	(N(N(H(H(N(H(A))))(H(N(H))(N(H))))))	sp|P00739|HPTR_HUMAN/sp|P00738|HPT_HUMAN	126/184
FSDGLESJSSTQFEVK	9 2 0 0 0	(N(N(H(H(H(H)))(H(H)(H(H(H)))))))	sp|P0C0L4|CO4A_HUMAN/sp|P0C0L5|CO4B_HUMAN	226/226
FSDGLESJSSTQFEVK	9 2 0 0 0	(N(N(H(H(H))(H(H(H(H(H(H)))))))))	sp|P0C0L4|CO4A_HUMAN/sp|P0C0L5|CO4B_HUMAN	226/226
LVPVPITJATLDQITGK	7 6 2 0 1	(N(N(H(H(N(H))(N(H(A))))(H(N(H)(F))(N(H(A)))))))	sp|P02763|A1AG1_HUMAN	33
LSLHRPALEDLLLGSEAJLTCTLTGLR	4 5 1 0 1	(N(N(H(H(N)(N(F)))(H(N(H(A)))))))	sp|P01876|IGHA1_HUMAN/sp|P0DOX2|IGA2_HUMAN/sp|P01877|IGHA2_HUMAN	144/246/131
LSVDKDQYVEPEJVTIQCDSGYGVVGPQSITCSGJR	5 4 1 0 0	(N(N(H(H(N(H)))(H(N(H(A)))))))	sp|P04003|C4BPA_HUMAN	506
GLKFJLTETSEAEIHQSFQHLLR	6 5 3 0 1	(N(N(H(H(N(F)(H(A))))(H(N(H(A)))(N(H(A)))))))	sp|P01011|AACT_HUMAN	106
STGKPTLYJVSLVMSDTAGTCY	7 2 0 0 0	(N(N(H(H(H)(H(H(H(H))))))))	sp|P0DOX6|IGM_HUMAN/sp|P01871|IGHM_HUMAN	563/440
HYTJSSQDVTVPCR	5 5 1 0 1	(N(F)(N(H(N)(H(N(H)))(H(N(H(A)))))))	sp|P0DOX2|IGA2_HUMAN/sp|P01877|IGHA2_HUMAN	207/92
TPLTAJITK	3 5 0 0 1	(N(F)(N(H(N)(H(N)(N(H))))))	sp|P0DOX2|IGA2_HUMAN/sp|P01877|IGHA2_HUMAN	320/205
GLCVJASAVSR	5 4 2 0 1	(N(F)(N(H(H(N(H(A))))(H(N(H(A)))))))	sp|P17936|IBP3_HUMAN	116
FLNJGTCTAEGK	5 4 2 0 0	(N(N(H(H(N(H(A))))(H(N(H(A)))))))	sp|P05156|CFAI_HUMAN	103
TYNVLDMKJTTCQDLQIEVTVK	5 4 2 0 0	(N(N(H(H(N(H(A))))(H(N(H(A)))))))	sp|P0C0L4|CO4A_HUMAN/sp|P0C0L5|CO4B_HUMAN	1391/1391
LVPVPITJATLDR	6 5 2 0 0	(N(N(H(H(N(H)))(H(N(H(A)))(N(H(A)))))))	sp|P19652|A1AG2_HUMAN	33
LQAILGVPWKDKJCTSR	5 4 2 0 0	(N(N(H(H(N(H(A))))(H(N(H(A)))))))	sp|P01019|ANGT_HUMAN	170
IPCSQPPQIEHGTIJSSR	5 4 1 0 0	(N(N(H(H(N(H)))(H(N(H(A)))))))	sp|P08603|CFAH_HUMAN	882
FSDGLESJSSTQFEVK	10 2 0 0 0	(N(N(H(H)(H(H(H(H(H(H(H(H)))))))))))	sp|P0C0L4|CO4A_HUMAN/sp|P0C0L5|CO4B_HUMAN	226/226
VSJQTLSLFFTVLQDVPVR	6 5 2 0 1	(N(F)(N(H(H(N(H(A))))(H(N(H(N(H(A)))))))))	sp|P01023|A2MG_HUMAN	1424
AVJITSENLIDDVVSLIR	6 5 3 0 1	(N(N(H(H(N(F)(H(A))))(H(N(H(A)))(N(H(A)))))))	sp|P02748|CO9_HUMAN	415
LAGKPTHVJVSVVMAEVDGTC	5 5 2 0 0	(N(N(H(N)(H(N(H(A))))(H(N(H(A)))))))	sp|P01876|IGHA1_HUMAN	340
STGKPTLYJVSLVMSDTAGTC	8 2 0 0 0	(N(N(H(H(H))(H(H(H))(H(H))))))	sp|P0DOX6|IGM_HUMAN/sp|P01871|IGHM_HUMAN	563/440
CSDGWSFDATTLDDJGTMLFFK	6 5 3 0 1	(N(N(H(H(N(F)(H(A))))(H(N(H(A)))(N(H(A)))))))	sp|P02790|HEMO_HUMAN	64
SLGNVJFTVSAEALESQELCGTEVPSVPEHGR	7 2 0 0 0	(N(N(H(H(H(H)))(H(H(H))))))	sp|P01023|A2MG_HUMAN	869
LSLHRPALEDLLLGSEAJLTCTLTGLR	5 4 2 0 1	(N(F)(N(H(H(N(H(A))))(H(N(H(A)))))))	sp|P01876|IGHA1_HUMAN/sp|P0DOX2|IGA2_HUMAN/sp|P01877|IGHA2_HUMAN	144/246/131
GGETAQSADPQWEQLNNKJLSMPLLPADFHK	5 4 2 0 0	(N(N(H(H(N(H(A))))(H(N(H(A)))))))	sp|P05546|HEP2_HUMAN	49
LAGKPTHVJVSVVMAEVDGTCY	4 3 1 0 1	(N(F)(N(H(H)(H(N(H(A)))))))	sp|P01876|IGHA1_HUMAN	340
DQCIVDDITYNVJDTFHK	5 4 1 0 0	(N(N(H(H(N(H)))(H(N(H(A)))))))	sp|P02751|FINC_HUMAN	528
SLGNVJFTVSAEALESQELCGTEVPSVPEHGR	5 2 0 0 0	(N(N(H(H)(H(H)(H)))))	sp|P01023|A2MG_HUMAN	869
GPVPTPPDNIQVQENFJISR	6 5 3 0 0	(N(N(H(N(H(A)))(H(N(H(A))))(H(N(H(A)))))))	sp|P02760|AMBP_HUMAN	36
SVQEIQATFFYFTPJK	7 6 2 0 0	(N(N(H(H(N(H))(N(H(A))))(H(N(H))(N(H(A)))))))	sp|P02763|A1AG1_HUMAN/sp|P19652|A1AG2_HUMAN	72/72
NPJATSSSSQDPESLQDR	5 4 2 0 0	(N(N(H(H(N(H(A))))(H(N(H(A)))))))	sp|P05155|IC1_HUMAN	25
TIHDLHLFIENIDFJK	5 4 2 0 0	(N(N(H(H(N(H(A))))(H(N(H(A)))))))	sp|P04114|APOB_HUMAN	2239
TLJQSSDELQLSMGNAMFVK	5 4 1 0 0	(N(N(H(H(N(H)))(H(N(H(A)))))))	sp|P01011|AACT_HUMAN	127
SVLLADVEDLIQQQISJDTVSPR	6 5 3 0 0	(N(N(H(H(N(H(A))))(H(N(H(A)))(N(H(A)))))))	sp|Q96IY4|CBPB2_HUMAN	108
VTQJLTLIEESLTSEFIHDIDR	5 4 2 0 1	(N(N(H(H(N(H(A))))(H(N(F)(H(A)))))))	sp|P36955|PEDF_HUMAN	285
QLAHQSJSTNIFFSPVSIATAFAMLSLGTK	6 5 2 0 1	(N(N(H(H(N(F)(H(A))))(H(N(H))(N(H(A)))))))	sp|P01009|A1AT_HUMAN	70
VVLHPJYSQVDIGLIK	6 3 1 0 0	(N(N(H(H)(H(H)(H(N(H(A))))))))	sp|P00738|HPT_HUMAN	241
KLPPGLLAJFTLLR	5 4 2 0 1	(N(F)(N(H(H(N(H(A))))(H(N(H(A)))))))	sp|P02750|A2GL_HUMAN	186
EEQYJSTYR	4 4 0 0 1	(N(F)(N(H(H(N))(H(N(H))))))	sp|P0DOX5|IGG1_HUMAN/sp|P01857|IGHG1_HUMAN	299/180
KAFITJFSMIIDGMTYPGIIK	6 5 3 0 0	(N(N(H(H(N(H(A))))(H(N(H(A)))(N(H(A)))))))	sp|Q14624|ITIH4_HUMAN	81
NPJATSSSSQDPESLQDR	5 4 2 0 1	(N(F)(N(H(H(N(H(A))))(H(N(H(A)))))))	sp|P05155|IC1_HUMAN	25
AQLLQGLGFJLTER	5 4 2 0 0	(N(N(H(H(N(H(A))))(H(N(H(A)))))))	sp|P08185|CBG_HUMAN	96
NJATVHEQVGGPSLTSDLQAQSK	5 4 2 0 1	(N(N(H(H(N(H(A))))(H(N(F)(H(A)))))))	sp|P04004|VTNC_HUMAN	86
NPJATSSSSQDPESLQDRGEGK	5 4 2 0 0	(N(N(H(H(N(H(A))))(H(N(H(A)))))))	sp|P05155|IC1_HUMAN	25
YFTPJKTEDTIFLR	7 6 2 0 0	(N(N(H(H(N(H))(N(H(A))))(H(N(H))(N(H(A)))))))	sp|P02763|A1AG1_HUMAN/sp|P19652|A1AG2_HUMAN	72/72
SISTALAFLSLGAHJTTLTEILK	8 7 5 0 0	(N(N(H(H(N(H(A)))(N(H(A))))(H(N(H(A)))(N(H(N(H(A(A))))))))))	sp|P01011|AACT_HUMAN	93
VVLHPJYSQVDIGLIK	7 6 1 0 0	(N(N(H(H(N(H))(N(H)))(H(N(H))(N(H(A)))))))	sp|P00738|HPT_HUMAN	241
EEQFJSTYR	5 4 1 0 1	(N(F)(N(H(H(N(H)))(H(N(H(A)))))))	sp|P01861|IGHG4_HUMAN	177
AFITJFSMIIDGMTYPGIIK	6 5 3 0 1	(N(N(H(H(N(F)(H(A))))(H(N(H(A)))(N(H(A)))))))	sp|Q14624|ITIH4_HUMAN	81
PALEDLLLGSEAJLTCTLTGLR	6 4 1 0 0	(N(N(H(H(H))(H(N(H))(N(H(A)))))))	sp|P01876|IGHA1_HUMAN/sp|P0DOX2|IGA2_HUMAN/sp|P01877|IGHA2_HUMAN	144/246/131
LVPVPITJATLDQITGK	6 5 3 0 2	(N(N(H(H(N(F)(H(A))))(H(N(H(A)))(N(F)(H(A)))))))	sp|P02763|A1AG1_HUMAN	33
FYFTPJKTEDTIFLR	6 5 3 0 0	(N(N(H(H(N(H(A))))(H(N(H(A)))(N(H(A)))))))	sp|P02763|A1AG1_HUMAN/sp|P19652|A1AG2_HUMAN	72/72
SLTFJETYQDISELVYGAK	5 4 1 0 0	(N(N(H(H(N(H)))(H(N(H(A)))))))	sp|P01008|ANT3_HUMAN	187
TPLTAJITK	6 5 1 0 1	(N(F)(N(H(H(N(H(A))))(H(N(H))(N(H))))))	sp|P0DOX2|IGA2_HUMAN/sp|P01877|IGHA2_HUMAN	320/205
SLGNVJFTVSAEALESQELCGTEVPSVPEHGR	6 3 0 0 0	(N(N(H(H(H(H)))(H(N(H))))))	sp|P01023|A2MG_HUMAN	869
FSDGLESJSSTQFEVK	8 2 0 0 0	(N(N(H(H)(H(H(H))(H(H(H)))))))	sp|P0C0L4|CO4A_HUMAN/sp|P0C0L5|CO4B_HUMAN	226/226
LSLHRPALEDLLLGSEAJLTCTLTGLR	6 4 1 0 0	(N(N(H(H(H))(H(N(H))(N(H(A)))))))	sp|P01876|IGHA1_HUMAN/sp|P0DOX2|IGA2_HUMAN/sp|P01877|IGHA2_HUMAN	144/246/131
YTGJASALFILPDQDK	6 5 3 0 0	(N(N(H(H(N(H(A))))(H(N(H(A)))(N(H(A)))))))	sp|P01011|AACT_HUMAN	271
LAHQSJSTNIFFSPVSIATAFAMLSLGTK	5 4 2 0 0	(N(N(H(H(N(H(A))))(H(N(H(A)))))))	sp|P01009|A1AT_HUMAN	70
JISDGFDGIPDNVDAALALPAHSYSGR	6 5 2 0 1	(N(F)(N(H(H(N(H(A))))(H(N(H(N(H(A)))))))))	sp|P04004|VTNC_HUMAN	242
ADTHDEILEGLNFJLTEIPEAQIHEGFQELLR	6 4 2 0 0	(N(N(H(H(N(H(A))))(H(N(H(H)(A)))))))	sp|P01009|A1AT_HUMAN	107
QQQHLFGSJVTDCSGJFCLFR	6 5 2 0 2	(N(F)(N(H(H(N(H)(F)))(H(N(H(A)))(N(H(A)))))))	sp|P02787|TRFE_HUMAN	630
VSJQTLSLFFTVLQDVPVR	6 4 1 0 1	(N(N(H(H(N(H(H))))(H(N(F)(H(A)))))))	sp|P01023|A2MG_HUMAN	1424
VYLQGLIDCYLFGJSSTVLEDSK	5 4 1 0 0	(N(N(H(H(N(H)))(H(N(H(A)))))))	sp|P35542|SAA4_HUMAN	94
YLGJATAIFFLPDEGK	5 4 1 0 2	(N(N(H(H(N(H)(F)))(H(N(F)(H(A)))))))	sp|P01009|A1AT_HUMAN	271
IITILEEEMJVSVCGLYTYGKPVPGHVTVSICR	5 4 2 0 0	(N(N(H(H(N(H(A))))(H(N(H(A)))))))	sp|P01023|A2MG_HUMAN	247
QVLFLDTVYGJCSTHFTVK	4 2 0 0 0	(N(N(H(H(H(H))))))	sp|P04114|APOB_HUMAN	185
FYFTPJKTEDTIFLR	7 6 2 0 0	(N(N(H(H(N(H))(N(H(A))))(H(N(H))(N(H(A)))))))	sp|P02763|A1AG1_HUMAN/sp|P19652|A1AG2_HUMAN	72/72
LSLHRPALEDLLLGSEAJLTCTLTGLR	4 5 0 0 0	(N(N(H(N)(H(N(H))(N(H))))))	sp|P01876|IGHA1_HUMAN/sp|P0DOX2|IGA2_HUMAN/sp|P01877|IGHA2_HUMAN	144/246/131
YAEDKFJETTEK	5 4 2 0 0	(N(N(H(H(N(H(A))))(H(N(H(A)))))))	sp|P43652|AFAM_HUMAN	402
IPCSQPPQIEHGTIJSSR	5 4 2 0 0	(N(N(H(H(N(H(A))))(H(N(H(A)))))))	sp|P08603|CFAH_HUMAN	882
DTFVJASR	5 4 2 0 1	(N(F)(N(H(H(N(H(A))))(H(N(H(A)))))))	sp|P05155|IC1_HUMAN	238
JGSLFAFR	6 3 1 0 0	(N(N(H(H(H(H)))(H(N(H(A)))))))	sp|P04004|VTNC_HUMAN	169
LAGKPTHVJVSVVMAEVDGTC	6 5 1 0 1	(N(F)(N(H(N)(H(N(H(H))))(H(N(H(A)))))))	sp|P01876|IGHA1_HUMAN	340
VDKDLQSLEDILHQVEJK	5 4 1 0 1	(N(N(H(H(N(H)(F)))(H(N(H(A)))))))	sp|P02679|FIBG_HUMAN	78
YKJNSDISSTR	4 5 1 0 1	(N(F)(N(H(N)(H(N))(H(N(H(A)))))))	sp|P01871|IGHM_HUMAN	46
EDALJETR	5 4 2 0 0	(N(N(H(H(N(H(A))))(H(N(H(A)))))))	sp|P10909|CLUS_HUMAN	86
JYTLTGR	5 4 2 0 1	(N(F)(N(H(H(N(H(A))))(H(N(H(A)))))))	sp|P10643|CO7_HUMAN	754
QLAHQSJSTNIFFSPVSIATAFAML	5 4 2 0 0	(N(N(H(H(N(H(A))))(H(N(H(A)))))))	sp|P01009|A1AT_HUMAN	70
SLGNVJFTVSAEALESQELCGTEVPSVPEHGR	5 4 0 0 0	(N(N(H(N)(H(H))(H(N(H))))))	sp|P01023|A2MG_HUMAN	869
SVQEIQATFFYFTPJKTEDTIFLR	6 5 2 0 3	(N(N(H(H(N(F)(H(A))))(H(N(H)(F))(N(F)(H(A)))))))	sp|P02763|A1AG1_HUMAN/sp|P19652|A1AG2_HUMAN	72/72
MLJTSSLLEQLNEQFNWVSR	5 4 1 0 1	(N(F)(N(H(H(N(H)))(H(N(H(A)))))))	sp|P10909|CLUS_HUMAN	354
QJQCFYJSSYLNVQR	6 5 3 0 0	(N(N(H(H(N(H(A))))(H(N(H(A)))(N(H(A)))))))	sp|P19652|A1AG2_HUMAN	93
JNSDISSTR	4 3 1 0 1	(N(F)(N(H(H)(H(N(H(A)))))))	sp|P01871|IGHM_HUMAN	46
ADTHDEILEGLNFJLTEIPEAQIHEGFQELLR	6 5 2 0 1	(N(F)(N(H(H(N(H(A))))(H(N(H(N(H(A)))))))))	sp|P01009|A1AT_HUMAN	107
HGIQYFNJNTQHSSLFMLNEVKR	6 5 3 0 0	(N(N(H(H(N(H(A))))(H(N(H(A)))(N(H(A)))))))	sp|P01042|KNG1_HUMAN	169
FJSSYLQGTNQITGR	4 3 1 0 0	(N(N(H(H)(H(N(H(A)))))))	sp|P04114|APOB_HUMAN	1523
QEPERJECFLQHK	5 4 2 0 0	(N(N(H(H(N(H(A))))(H(N(H(A)))))))	sp|P02768|ALBU_HUMAN	123
YLGJATAIFFLPDEGK	6 4 1 0 1	(N(N(H(H(N(H(H))))(H(N(F)(H(A)))))))	sp|P01009|A1AT_HUMAN	271
TPLTAJITK	5 5 1 0 1	(N(F)(N(H(N)(H(N(H)))(H(N(H(A)))))))	sp|P0DOX2|IGA2_HUMAN/sp|P01877|IGHA2_HUMAN	320/205
FSDGLESJSSTQFEVK	9 2 0 0 0	(N(N(H(H)(H(H(H))(H(H(H(H))))))))	sp|P0C0L4|CO4A_HUMAN/sp|P0C0L5|CO4B_HUMAN	226/226
EEQYJSTYR	5 4 1 0 0	(N(N(H(N)(H(H))(H(N(H(A)))))))	sp|P0DOX5|IGG1_HUMAN/sp|P01857|IGHG1_HUMAN	299/180
JCCNTENPPGCYR	5 4 2 0 0	(N(N(H(H(N(H(A))))(H(N(H(A)))))))	sp|P43652|AFAM_HUMAN	383
EEQFJSTFR	4 4 1 0 0	(N(N(H(H(N))(H(N(H(A)))))))	sp|P01859|IGHG2_HUMAN	176
SLGNVJF	5 2 0 0 0	(N(N(H(H)(H(H)(H)))))	sp|P01023|A2MG_HUMAN	869
YLGJATAIFFLPDEGK	5 4 1 0 0	(N(N(H(H)(H(N(H))(N(H(A)))))))	sp|P01009|A1AT_HUMAN	271
JTTCQDLQIEVTVK	5 4 1 0 0	(N(N(H(H(N(H)))(H(N(H(A)))))))	sp|P0C0L4|CO4A_HUMAN/sp|P0C0L5|CO4B_HUMAN	1391/1391
VSJQTLSLFFTVLQDVPVR	5 4 0 0 1	(N(F)(N(H(H(N(H)))(H(N(H))))))	sp|P01023|A2MG_HUMAN	1424
VDKDLQSLEDILHQVEJK	6 5 1 0 0	(N(N(H(H(N(H(A))))(H(N(H))(N(H))))))	sp|P02679|FIBG_HUMAN	78
LSDLSIJSTECLHVHCR	6 5 3 0 0	(N(N(H(H(N(H(A))))(H(N(H(A)))(N(H(A)))))))	sp|P05156|CFAI_HUMAN	177
NEEYJK	6 5 3 0 1	(N(F)(N(H(H(N(H(A))))(H(N(H(A)))(N(H(A)))))))	sp|P02763|A1AG1_HUMAN/sp|P19652|A1AG2_HUMAN	56/56
FSLLGHASISCTVEJETIGVWRPSPPTCEK	5 4 2 0 1	(N(F)(N(H(H(N(H(A))))(H(N(H(A)))))))	sp|P04003|C4BPA_HUMAN	221
YKJNSDISSTR	5 5 2 0 1	(N(F)(N(H(N)(H(N(H(A))))(H(N(H(A)))))))	sp|P01871|IGHM_HUMAN	46
ADTHDEILEGLNFJLTEIPEAQIHEGFQELLR	5 4 1 0 0	(N(N(H(H)(H(N(H))(N(H(A)))))))	sp|P01009|A1AT_HUMAN	107
QJQCFYJSSYLNVQR	7 6 3 0 0	(N(N(H(H(N(H))(N(H(A))))(H(N(H(A)))(N(H(A)))))))	sp|P19652|A1AG2_HUMAN	93
GCVLLSYLJETVTVSASLESVR	5 5 1 0 1	(N(N(H(H(N(H(A))))(H(N(H))(N(F))))))	sp|P01023|A2MG_HUMAN	55
CANLVPVPITJATLDR	5 4 2 0 0	(N(N(H(H(N(H(A))))(H(N(H(A)))))))	sp|P19652|A1AG2_HUMAN	33
SLTFJETYQDISELVYGAK	5 4 2 0 1	(N(F)(N(H(H(N(H(A))))(H(N(H(A)))))))	sp|P01008|ANT3_HUMAN	187
PALEDLLLGSEAJLTCTLTGLR	5 2 0 0 0	(N(N(H(H)(H(H(H))))))	sp|P01876|IGHA1_HUMAN/sp|P0DOX2|IGA2_HUMAN/sp|P01877|IGHA2_HUMAN	144/246/131
QVLFLDTVYGJCSTHFTVK	7 2 0 0 0	(N(N(H(H(H)(H))(H(H)(H)))))	sp|P04114|APOB_HUMAN	185
SIVQTJCSK	6 5 3 0 0	(N(N(H(H(N(H(A))))(H(N(H(A)))(N(H(A)))))))	sp|P01042|KNG1_HUMAN	205
VSJQTLSLFFTVLQDVPVR	5 5 1 0 1	(N(F)(N(H(H(N)(N(H)))(H(N(H(A)))))))	sp|P01023|A2MG_HUMAN	1424
JHSCSEGQISIFR	5 4 2 0 0	(N(N(H(H(N(H(A))))(H(N(H(A)))))))	sp|O75882|ATRN_HUMAN	731
FSDGLESJSSTQFEVK	8 2 0 0 0	(N(N(H(H(H))(H(H(H(H(H))))))))	sp|P0C0L4|CO4A_HUMAN/sp|P0C0L5|CO4B_HUMAN	226/226
SWPAVGJCSSALR	6 5 3 0 1	(N(N(H(H(N(F)(H(A))))(H(N(H(A)))(N(H(A)))))))	sp|P02790|HEMO_HUMAN	187
YKJNSDISSTR	6 5 1 0 1	(N(F)(N(H(H(N(H)))(H(N(H))(N(H(A)))))))	sp|P01871|IGHM_HUMAN	46
KVCQDCPLLAPLJDTR	6 5 3 0 0	(N(N(H(H(N(H(A))))(H(N(H(A)))(N(H(A)))))))	sp|P02765|FETUA_HUMAN	156
HJSTGCLR	5 4 1 0 0	(N(N(H(H(N(H)))(H(N(H(A)))))))	sp|P10909|CLUS_HUMAN	291
EEQFJSTFR	5 4 0 0 1	(N(F)(N(H(H(H))(H(N)(N(H))))))	sp|P01859|IGHG2_HUMAN	176
HAJWTLTPLK	5 4 1 0 0	(N(N(H(H(N(H)))(H(N(H(A)))))))	sp|P27169|PON1_HUMAN	253
EEQFJSTFR	5 4 0 0 1	(N(F)(N(H(H(N))(H(N(H(H)))))))	sp|P01859|IGHG2_HUMAN	176
LNAENJATFYFK	5 4 2 0 0	(N(N(H(H(N(H(A))))(H(N(H(A)))))))	sp|P01042|KNG1_HUMAN	294
VVLHPJYSQVDIGLIK	5 4 2 0 1	(N(F)(N(H(H(N(H(A))))(H(N(H(A)))))))	sp|P00738|HPT_HUMAN	241
TLLJASR	5 5 2 0 0	(N(N(H(N)(H(N(H(A))))(H(N(H(A)))))))	sp|P01880|IGHD_HUMAN/sp|P0DOX3|IGD_HUMAN	367/496
VVLHPJYSQVDIGLIK	6 4 2 0 0	(N(N(H(H(N(H(A))))(H(N(H(H)(A)))))))	sp|P00738|HPT_HUMAN	241
LSLHRPALEDLLLGSEAJLTCTLTGLR	5 5 2 0 1	(N(F)(N(H(H(N(H(A))))(H(N)(N(H(A)))))))	sp|P01876|IGHA1_HUMAN/sp|P0DOX2|IGA2_HUMAN/sp|P01877|IGHA2_HUMAN	144/246/131
SHEIWTHSCPQSPGJGTDASH	5 4 2 0 0	(N(N(H(H(N(H(A))))(H(N(H(A)))))))	sp|P04278|SHBG_HUMAN	396
GLTFQQJASSMCVPDQDTAIR	4 5 1 0 1	(N(F)(N(H(N)(H(N(H))(N(H(A)))))))	sp|P0DOX6|IGM_HUMAN/sp|P01871|IGHM_HUMAN	332/209
LSLHRPALEDLLLGSEAJLTCTLTGLR	5 5 1 0 1	(N(F)(N(H(N)(H(N(H)))(H(N(H(A)))))))	sp|P01876|IGHA1_HUMAN/sp|P0DOX2|IGA2_HUMAN/sp|P01877|IGHA2_HUMAN	144/246/131
GLTFQQJASSMCVPDQDTAIR	5 5 1 0 1	(N(N(H(H(N(H(A))))(H(N)(N(H)(F))))))	sp|P0DOX6|IGM_HUMAN/sp|P01871|IGHM_HUMAN	332/209
LSLHRPALEDLLLGSEAJLTCTLTGLR	6 4 1 0 0	(N(N(H(H(N(H(H))))(H(N(H(A)))))))	sp|P01876|IGHA1_HUMAN/sp|P0DOX2|IGA2_HUMAN/sp|P01877|IGHA2_HUMAN	144/246/131
GLTFQQJASSMCVPDQDTAIR	6 5 1 0 1	(N(F)(N(H(H(N(H(A))))(H(N(H))(N(H))))))	sp|P0DOX6|IGM_HUMAN/sp|P01871|IGHM_HUMAN	332/209
ALPQPQJVTSLLGC	5 4 2 0 0	(N(N(H(H(N(H(A))))(H(N(H(A)))))))	sp|P02790|HEMO_HUMAN	453
LSLHRPALEDLLLGSEAJLTCTLTGLR	5 5 2 0 1	(N(N(H(H(N(F)))(H(N(H(A)))(N(H(A)))))))	sp|P01876|IGHA1_HUMAN/sp|P0DOX2|IGA2_HUMAN/sp|P01877|IGHA2_HUMAN	144/246/131
EHEGAIYPDJTTDFQR	5 4 2 0 1	(N(F)(N(H(H(N(H(A))))(H(N(H(A)))))))	sp|P00450|CERU_HUMAN	138
QVLFLDTVYGJCSTHFTVK	4 2 0 0 0	(N(N(H(H(H)(H)))))	sp|P04114|APOB_HUMAN	185
STGKPTLYJVSLVMSDTAGTCY	8 2 0 0 0	(N(N(H(H(H(H)))(H(H)(H(H))))))	sp|P0DOX6|IGM_HUMAN/sp|P01871|IGHM_HUMAN	563/440
EHEGAIYPDJTTDFQR	6 5 3 0 2	(N(F)(N(H(H(N(F)(H(A))))(H(N(H(A)))(N(H(A)))))))	sp|P00450|CERU_HUMAN	138
LSLLEEPGJGTFTVILNQLTSR	5 4 2 0 0	(N(N(H(H(N(H(A))))(H(N(H(A)))))))	sp|P01833|PIGR_HUMAN	421
VIDFJCTTSSVSSALANTK	6 3 1 0 0	(N(N(H(H)(H(H)(H(N(H(A))))))))	sp|P04196|HRG_HUMAN	125
DLQSLEDILHQVEJK	5 4 1 0 0	(N(N(H(H(N(H)))(H(N(H(A)))))))	sp|P02679|FIBG_HUMAN	78
JYTLTGR	5 5 1 0 1	(N(F)(N(H(N)(H(N(H)))(H(N(H(A)))))))	sp|P10643|CO7_HUMAN	754
QJQCFYJSSYLNVQR	7 6 3 0 1	(N(N(H(H(N(H)(F))(N(H(A))))(H(N(H(A)))(N(H(A)))))))	sp|P19652|A1AG2_HUMAN	93
PALEDLLLGSEAJLTCTLTGLR	5 2 0 0 0	(N(N(H(H(H)(H(H))))))	sp|P01876|IGHA1_HUMAN/sp|P0DOX2|IGA2_HUMAN/sp|P01877|IGHA2_HUMAN	144/246/131
SVQEIQATFFYFTPJKTEDTIFLR	6 5 1 0 0	(N(N(H(H(N(H(A))))(H(N(H))(N(H))))))	sp|P02763|A1AG1_HUMAN/sp|P19652|A1AG2_HUMAN	72/72
ALMDGASQLMGEJR	5 4 1 0 0	(N(N(H(H(N(H)))(H(N(H(A)))))))	sp|P02675|FIBB_HUMAN	394
STGKPTLYJVSLVMSDTAGTCY	6 2 0 0 0	(N(N(H(H(H(H(H(H))))))))	sp|P0DOX6|IGM_HUMAN/sp|P01871|IGHM_HUMAN	563/440
LVPVPITJATLDQITGK	7 6 2 0 0	(N(N(H(H(N(H))(N(H(A))))(H(N(H))(N(H(A)))))))	sp|P02763|A1AG1_HUMAN	33
SLGNVJFTVSAEALESQELCGTEVPSVPEHGR	6 3 0 0 0	(N(N(H(H(H)(H))(H(H(N))))))	sp|P01023|A2MG_HUMAN	869
SLGNVJFTVSAEALESQELCGTEVPSVPEHGR	5 3 0 0 0	(N(N(H(H(H))(H(N(H))))))	sp|P01023|A2MG_HUMAN	869
PALEDLLLGSEAJLTCTLTGLR	3 3 0 0 0	(N(N(H(H)(H(N)))))	sp|P01876|IGHA1_HUMAN/sp|P0DOX2|IGA2_HUMAN/sp|P01877|IGHA2_HUMAN	144/246/131
FSDGLESJSSTQFEVK	10 2 0 0 0	(N(N(H(H(H))(H(H)(H(H(H(H(H)))))))))	sp|P0C0L4|CO4A_HUMAN/sp|P0C0L5|CO4B_HUMAN	226/226
QVLFLDTVYGJCSTHFTVK	5 2 0 0 0	(N(N(H(H)(H(H)(H)))))	sp|P04114|APOB_HUMAN	185
STGKPTLYJVSLVMSDTAGTC	8 2 0 0 0	(N(N(H(H(H(H)))(H(H)(H)(H)))))	sp|P0DOX6|IGM_HUMAN/sp|P01871|IGHM_HUMAN	563/440
FJSSYLQGTNQITGR	6 3 1 0 0	(N(N(H(H)(H(H)(H(N(H(A))))))))	sp|P04114|APOB_HUMAN	1523
QVLFLDTVYGJCSTHFTVK	4 2 0 0 0	(N(N(H(H)(H(H)))))	sp|P04114|APOB_HUMAN	185
PALEDLLLGSEAJLTCTLTGLR	5 4 1 0 1	(N(F)(N(H(H(N(H)))(H(N(H(A)))))))	sp|P01876|IGHA1_HUMAN/sp|P0DOX2|IGA2_HUMAN/sp|P01877|IGHA2_HUMAN	144/246/131
NJATVHEQVGGPSLTSDLQAQSK	5 4 2 0 1	(N(F)(N(H(H(N(H(A))))(H(N(H(A)))))))	sp|P04004|VTNC_HUMAN	86
VDKDLQSLEDILHQVEJK	4 4 1 0 0	(N(N(H(H(N(H))(N(H(A)))))))	sp|P02679|FIBG_HUMAN	78
NLFLJHSEJATAK	5 4 2 0 0	(N(N(H(H(N(H(A))))(H(N(H(A)))))))	sp|P00739|HPTR_HUMAN/sp|P00738|HPT_HUMAN	153/211
GTAGNALMDGASQLMGEJR	5 4 2 0 1	(N(N(H(H(N(H(A))))(H(N(F)(H(A)))))))	sp|P02675|FIBB_HUMAN	394
VDKDLQSLEDILHQVEJK	5 4 0 0 2	(N(N(H(H(N(H(F))))(H(N(H(F)))))))	sp|P02679|FIBG_HUMAN	78
STGKPTLYJVSLVMSDTAGTC	7 2 0 0 0	(N(N(H(H(H))(H(H)(H)(H)))))	sp|P0DOX6|IGM_HUMAN/sp|P01871|IGHM_HUMAN	563/440
LSLHRPALEDLLLGSEAJLTCTLTGLR	5 5 2 0 0	(N(N(H(H(N(H(A))))(H(N)(N(H(A)))))))	sp|P01876|IGHA1_HUMAN/sp|P0DOX2|IGA2_HUMAN/sp|P01877|IGHA2_HUMAN	144/246/131
PALEDLLLGSEAJLTCTLTGLR	5 5 2 0 0	(N(N(H(N)(H(N(H(A))))(H(N(H(A)))))))	sp|P01876|IGHA1_HUMAN/sp|P0DOX2|IGA2_HUMAN/sp|P01877|IGHA2_HUMAN	144/246/131
CSDGWSFDATTLDDJGTMLFFK	6 5 3 0 0	(N(N(H(H(N(H(A))))(H(N(H(A)))(N(H(A)))))))	sp|P02790|HEMO_HUMAN	64
PALEDLLLGSEAJLTCTLTGLR	4 3 1 0 0	(N(N(H(H)(H(N(H(A)))))))	sp|P01876|IGHA1_HUMAN/sp|P0DOX2|IGA2_HUMAN/sp|P01877|IGHA2_HUMAN	144/246/131
DIVEYYJDSJGSHVLQGR	5 4 2 0 1	(N(F)(N(H(H(N(H(A))))(H(N(H(A)))))))	sp|P25311|ZA2G_HUMAN	112
FSDGLESJSSTQFEVK	10 2 0 0 0	(N(N(H(H(H)(H(H)))(H(H)(H(H(H)))))))	sp|P0C0L4|CO4A_HUMAN/sp|P0C0L5|CO4B_HUMAN	226/226
MLJTSSLLEQLNEQFNWVSR	6 5 3 0 1	(N(N(H(H(N(F)(H(A))))(H(N(H(A)))(N(H(A)))))))	sp|P10909|CLUS_HUMAN	354
TNAELFJQSDIVAHLLSSSSSVIDALQYK	9 2 0 0 0	(N(N(H(H(H)(H(H)))(H(H)(H(H))))))	sp|P04114|APOB_HUMAN	3358
LAGKPTHVJVSVVMAEVDGTC	4 5 0 0 1	(N(F)(N(H(N)(H(N))(H(N(H))))))	sp|P01876|IGHA1_HUMAN	340
AALAAFNAQNJGSNFQLEEISR	6 5 2 0 1	(N(F)(N(H(H(N(H(A))))(H(N(H(N(H(A)))))))))	sp|P02765|FETUA_HUMAN	176
VVLHPJYSQVDIGLIK	5 4 1 0 1	(N(N(H(H(N(H)(F)))(H(N(H(A)))))))	sp|P00738|HPT_HUMAN	241
PALEDLLLGSEAJLTCTLTGLR	5 4 2 0 1	(N(F)(N(H(H(N(H(A))))(H(N(H(A)))))))	sp|P01876|IGHA1_HUMAN/sp|P0DOX2|IGA2_HUMAN/sp|P01877|IGHA2_HUMAN	144/246/131
GLTFQQJASSMCVPDQDTAIR	5 4 2 0 1	(N(N(H(H(N(H(A))))(H(N(F)(H(A)))))))	sp|P0DOX6|IGM_HUMAN/sp|P01871|IGHM_HUMAN	332/209
TNAELFJQSDIVAHLLSSSSSVIDALQYK	9 2 0 0 0	(N(N(H(H(H))(H(H)(H(H(H(H))))))))	sp|P04114|APOB_HUMAN	3358
STGKPTLYJVSLVMSDTAGTC	6 2 0 0 0	(N(N(H(H)(H(H)(H(H))))))	sp|P0DOX6|IGM_HUMAN/sp|P01871|IGHM_HUMAN	563/440
GJVTFTIPANR	6 2 0 0 0	(N(N(H(H)(H(H)(H(H))))))	sp|P01024|CO3_HUMAN	85
LAGKPTHVJVSVVMAEVDGTCY	5 5 1 0 1	(N(F)(N(H(N)(H(N(H)))(H(N(H(A)))))))	sp|P01876|IGHA1_HUMAN	340
PALEDLLLGSEAJLTCTLTGLR	6 3 1 0 0	(N(N(H(H(H(H)))(H(N(H(A)))))))	sp|P01876|IGHA1_HUMAN/sp|P0DOX2|IGA2_HUMAN/sp|P01877|IGHA2_HUMAN	144/246/131
GLTFQQJASSMCVPDQDTAIR	5 5 1 0 0	(N(N(H(N)(H(N(H)))(H(N(H(A)))))))	sp|P0DOX6|IGM_HUMAN/sp|P01871|IGHM_HUMAN	332/209
NPJATSSSSQDPESLQDR	6 5 3 0 1	(N(N(H(H(N(F)(H(A))))(H(N(H(A)))(N(H(A)))))))	sp|P05155|IC1_HUMAN	25
QVLFLDTVYGJCSTHFTVK	7 2 0 0 0	(N(N(H(H(H(H)))(H(H(H))))))	sp|P04114|APOB_HUMAN	185
FSDGLESJSSTQFEVK	10 2 0 0 0	(N(N(H(H)(H(H(H(H)))(H(H(H(H))))))))	sp|P0C0L4|CO4A_HUMAN/sp|P0C0L5|CO4B_HUMAN	226/226
ELHHLQEQJVSNAFLDK	6 5 3 0 0	(N(N(H(H(N(H(A))))(H(N(H(A)))(N(H(A)))))))	sp|P00450|CERU_HUMAN	762
ADGTVNQIEGEATPVJLTEPAKLEVK	4 3 0 0 1	(N(F)(N(H(H)(H(N(H))))))	sp|P05090|APOD_HUMAN	98
GLTFQQJASSMCVPDQDTAIR	4 5 1 0 1	(N(F)(N(H(N)(H(N))(H(N(H(A)))))))	sp|P0DOX6|IGM_HUMAN/sp|P01871|IGHM_HUMAN	332/209
GTAGNALMDGASQLMGEJR	5 4 1 0 0	(N(N(H(N)(H(H))(H(N(H(A)))))))	sp|P02675|FIBB_HUMAN	394
TPLTAJITK	5 4 1 0 0	(N(N(H(H(N(H)))(H(N(H(A)))))))	sp|P0DOX2|IGA2_HUMAN/sp|P01877|IGHA2_HUMAN	320/205
SWPAVGJCSSALR	6 5 3 0 1	(N(F)(N(H(H(N(H(A))))(H(N(H(A)))(N(H(A)))))))	sp|P02790|HEMO_HUMAN	187
IYSJHSALESLALIPLQAPLK	5 4 1 0 1	(N(F)(N(H(H(N(H)))(H(N(H(A)))))))	sp|P55058|PLTP_HUMAN	398
TNAELFJQSDIVAHLLSSSSSVIDALQYK	9 2 0 0 0	(N(N(H(H(H)(H))(H(H(H))(H(H))))))	sp|P04114|APOB_HUMAN	3358
GTAGNALMDGASQLMGEJR	3 3 0 0 0	(N(N(H(H)(H(N)))))	sp|P02675|FIBB_HUMAN	394
VDKDLQSLEDILHQVEJK	6 4 1 0 0	(N(N(H(H(N(H(H))))(H(N(H(A)))))))	sp|P02679|FIBG_HUMAN	78
SQPPQIEHGTIJSSR	5 4 2 0 0	(N(N(H(H(N(H(A))))(H(N(H(A)))))))	sp|P08603|CFAH_HUMAN	882
CANLVPVPITJATLDR	6 5 2 0 1	(N(N(H(H(N(H)(F)))(H(N(H(A)))(N(H(A)))))))	sp|P19652|A1AG2_HUMAN	33
LVPVPITJATLDQITGK	6 5 3 0 2	(N(F)(N(H(H(N(F)(H(A))))(H(N(H(A)))(N(H(A)))))))	sp|P02763|A1AG1_HUMAN	33
GLTFQQJASSMCVPDQDTAIR	4 5 1 0 1	(N(F)(N(H(H(N)(N))(H(N(H(A)))))))	sp|P0DOX6|IGM_HUMAN/sp|P01871|IGHM_HUMAN	332/209
VDKDLQSLEDILHQVEJK	3 3 0 0 0	(N(N(H(N)(H(H)))))	sp|P02679|FIBG_HUMAN	78
GTAGNALMDGASQLMGEJR	5 4 1 0 1	(N(F)(N(H(H(N(H)))(H(N(H(A)))))))	sp|P02675|FIBB_HUMAN	394
LSLHRPALEDLLLGSEAJLTCTLTGLR	6 4 1 0 0	(N(N(H(H(H)(H))(H(N)(N(H(A)))))))	sp|P01876|IGHA1_HUMAN/sp|P0DOX2|IGA2_HUMAN/sp|P01877|IGHA2_HUMAN	144/246/131
GTAGNALMDGASQLMGEJR	5 4 1 0 0	(N(N(H(H(H))(H(N)(N(H(A)))))))	sp|P02675|FIBB_HUMAN	394
FJSSYLQGTNQITGR	4 4 1 0 0	(N(N(H(H(N))(H(N(H(A)))))))	sp|P04114|APOB_HUMAN	1523
VVLHPJYSQVDIGLIK	5 4 1 0 0	(N(N(H(H(H))(H(N)(N(H(A)))))))	sp|P00738|HPT_HUMAN	241
QQQHLFGSJVTDCSGJFCLFR	5 4 1 0 1	(N(N(H(H(N(H)(F)))(H(N(H(A)))))))	sp|P02787|TRFE_HUMAN	630
FSDGLESJSSTQFEVK	10 2 0 0 0	(N(N(H(H(H)(H))(H(H(H(H(H(H)))))))))	sp|P0C0L4|CO4A_HUMAN/sp|P0C0L5|CO4B_HUMAN	226/226
CANLVPVPITJATLDR	6 5 2 0 1	(N(N(H(H(N(F)(H(A))))(H(N(H))(N(H(A)))))))	sp|P19652|A1AG2_HUMAN	33
VDKDLQSLEDILHQVEJK	5 4 0 0 0	(N(N(H(H(N))(H(N(H(H)))))))	sp|P02679|FIBG_HUMAN	78
STGKPTLYJVSLVMSDTAGTCY	6 2 0 0 0	(N(N(H(H(H)(H(H(H)))))))	sp|P0DOX6|IGM_HUMAN/sp|P01871|IGHM_HUMAN	563/440
PTHVJVSVVMAEVDGTCY	5 5 2 0 1	(N(F)(N(H(N)(H(N(H(A))))(H(N(H(A)))))))	sp|P01876|IGHA1_HUMAN	340
GTAGNALMDGASQLMGEJR	6 4 1 0 0	(N(N(H(H(N(H(H))))(H(N(H(A)))))))	sp|P02675|FIBB_HUMAN	394
FSDGLESJSSTQFEVK	8 2 0 0 0	(N(N(H(H(H(H)))(H(H)(H)(H)))))	sp|P0C0L4|CO4A_HUMAN/sp|P0C0L5|CO4B_HUMAN	226/226
LQAPLJYTEFQKPICLPSK	5 4 1 0 0	(N(N(H(H(N(H)))(H(N(H(A)))))))	sp|P03952|KLKB1_HUMAN	494
LAJLTQGEDQYYLR	6 5 3 0 1	(N(F)(N(H(H(N(H(A))))(H(N(H(A)))(N(H(A)))))))	sp|P10909|CLUS_HUMAN	374
QLAHQSJSTNIFFSPVSIATAFAMLSLGTK	5 4 2 0 1	(N(N(H(H(N(H(A))))(H(N(F)(H(A)))))))	sp|P01009|A1AT_HUMAN	70
TEVSSNHVLIYLDKVSJQTLSLF	5 4 2 0 0	(N(N(H(H(N(H(A))))(H(N(H(A)))))))	sp|P01023|A2MG_HUMAN	1424
SIJTTNVMGTSLTVR	5 2 0 0 0	(N(N(H(H(H(H(H)))))))	sp|P01023|A2MG_HUMAN	410
VDKDLQSLEDILHQVEJK	4 4 1 0 1	(N(N(H(H(N(F)))(H(N(H(A)))))))	sp|P02679|FIBG_HUMAN	78
DIVEYYJDSJGSHVLQGR	6 5 3 0 1	(N(F)(N(H(H(N(H(A))))(H(N(H(A)))(N(H(A)))))))	sp|P25311|ZA2G_HUMAN	109
LVPVPITJATLDQITGK	5 4 1 0 2	(N(N(H(H(N(H)(F)))(H(N(F)(H(A)))))))	sp|P02763|A1AG1_HUMAN	33
VDKDLQSLEDILHQVEJK	5 4 1 0 0	(N(N(H(H(H))(H(N)(N(H(A)))))))	sp|P02679|FIBG_HUMAN	78
LSLHRPALEDLLLGSEAJLTCTLTGLR	4 5 1 0 0	(N(N(H(N)(H(N))(H(N(H(A)))))))	sp|P01876|IGHA1_HUMAN/sp|P0DOX2|IGA2_HUMAN/sp|P01877|IGHA2_HUMAN	144/246/131
TVLTPATNHMGJVTFTIPANR	6 2 0 0 0	(N(N(H(H(H))(H(H(H))))))	sp|P01024|CO3_HUMAN	85
PVTPIAQJQTTLGSSR	5 4 2 0 0	(N(N(H(H(N(H(A))))(H(N(H(A)))))))	sp|Q9NZP8|C1RL_HUMAN	242
LVPVPITJATLDQITGK	6 5 3 0 1	(N(F)(N(H(H(N(H(A))))(H(N(H(A)))(N(H(A)))))))	sp|P02763|A1AG1_HUMAN	33
FSDGLESJSSTQFEVK	7 2 0 0 0	(N(N(H(H(H)(H))(H(H)(H)))))	sp|P0C0L4|CO4A_HUMAN/sp|P0C0L5|CO4B_HUMAN	226/226
TPLTAJITK	4 5 0 0 1	(N(F)(N(H(N)(H(N))(H(N(H))))))	sp|P0DOX2|IGA2_HUMAN/sp|P01877|IGHA2_HUMAN	320/205
LSLHRPALEDLLLGSEAJLTCTLTGLR	5 4 1 0 1	(N(F)(N(H(H(N(H)))(H(N(H(A)))))))	sp|P01876|IGHA1_HUMAN/sp|P0DOX2|IGA2_HUMAN/sp|P01877|IGHA2_HUMAN	144/246/131
ELHHLQEQJVSNAFLDK	5 4 2 0 1	(N(F)(N(H(H(N(H(A))))(H(N(H(A)))))))	sp|P00450|CERU_HUMAN	762
STGKPTLYJVSLVMSDTAGTCY	6 2 0 0 0	(N(N(H(H)(H(H(H(H)))))))	sp|P0DOX6|IGM_HUMAN/sp|P01871|IGHM_HUMAN	563/440
CMWSSALNSLJLSFAGLEQVPK	9 2 0 0 0	(N(N(H(H)(H(H(H(H)))(H(H(H)))))))	sp|P08571|CD14_HUMAN	282
VDKDLQSLEDILHQVEJK	4 4 1 0 0	(N(N(H(H)(H(N)(N(H(A)))))))	sp|P02679|FIBG_HUMAN	78
GLTFQQJASSMCVPDQDTAIR	5 4 2 0 0	(N(N(H(H(N(H(A))))(H(N(H(A)))))))	sp|P0DOX6|IGM_HUMAN/sp|P01871|IGHM_HUMAN	332/209
YKJNSDISSTR	4 3 0 0 1	(N(F)(N(H(H(H))(H(N)))))	sp|P01871|IGHM_HUMAN	46
YKJNSDISSTR	5 4 1 0 0	(N(N(H(H(N(H)))(H(N(H(A)))))))	sp|P01871|IGHM_HUMAN	46
STGKPTLYJVSLVMSDTAGTC	7 2 0 0 0	(N(N(H(H(H(H)))(H(H(H))))))	sp|P0DOX6|IGM_HUMAN/sp|P01871|IGHM_HUMAN	563/440
HYTJSSQDVTVPCR	5 5 1 0 1	(N(N(H(N)(H(N(H)(F)))(H(N(H(A)))))))	sp|P0DOX2|IGA2_HUMAN/sp|P01877|IGHA2_HUMAN	207/92
ADGTVNQIEGEATPVJLTEPAKLEVK	5 4 1 0 0	(N(N(H(H(N(H)))(H(N(H(A)))))))	sp|P05090|APOD_HUMAN	98
TPLTAJITK	5 5 1 0 0	(N(N(H(N)(H(N(H)))(H(N(H(A)))))))	sp|P0DOX2|IGA2_HUMAN/sp|P01877|IGHA2_HUMAN	320/205
IDSTGJVTNELR	5 2 0 0 0	(N(N(H(H)(H(H(H))))))	sp|O75882|ATRN_HUMAN	416
FSDGLESJSSTQFEVK	9 2 0 0 0	(N(N(H(H(H)(H(H(H(H(H(H))))))))))	sp|P0C0L4|CO4A_HUMAN/sp|P0C0L5|CO4B_HUMAN	226/226
VDKDLQSLEDILHQVEJK	5 4 0 0 0	(N(N(H(H(N))(H(H)(H)(N)))))	sp|P02679|FIBG_HUMAN	78
IDSTGJVTNELR	5 2 0 0 0	(N(N(H(H(H(H(H)))))))	sp|O75882|ATRN_HUMAN	416
LAGKPTHVJVSVVMAEVDGTC	4 5 1 0 1	(N(F)(N(H(N)(H(N))(H(N(H(A)))))))	sp|P01876|IGHA1_HUMAN	340
AFGSNPJLTK	5 4 2 0 0	(N(N(H(H(N(H(A))))(H(N(H(A)))))))	sp|P22792|CPN2_HUMAN	74
FSDGLESJSSTQFEVK	9 2 0 0 0	(N(N(H(H(H(H(H))))(H(H(H(H)))))))	sp|P0C0L4|CO4A_HUMAN/sp|P0C0L5|CO4B_HUMAN	226/226
FSDGLESJSSTQFEVK	10 2 0 0 0	(N(N(H(H(H(H)))(H(H(H(H(H(H)))))))))	sp|P0C0L4|CO4A_HUMAN/sp|P0C0L5|CO4B_HUMAN	226/226
CGLVPVLAENYJK	6 5 2 0 0	(N(N(H(H(N(H(A))))(H(N(H))(N(H(A)))))))	sp|P02787|TRFE_HUMAN	432
QDQCIYJTTYLNVQR	6 5 3 0 1	(N(F)(N(H(H(N(H(A))))(H(N(H(A)))(N(H(A)))))))	sp|P02763|A1AG1_HUMAN	93
FSDGLESJSSTQFEVK	9 2 0 0 0	(N(N(H(H(H)(H(H)))(H(H(H(H)))))))	sp|P0C0L4|CO4A_HUMAN/sp|P0C0L5|CO4B_HUMAN	226/226
DFHSEYIVSASJFTSQLSSQVEQFLHR	5 4 2 0 0	(N(N(H(H(N(H(A))))(H(N(H(A)))))))	sp|P04114|APOB_HUMAN	4431
STGKPTLYJVSLVMSDTAGTC	6 2 0 0 0	(N(N(H(H)(H(H(H(H)))))))	sp|P0DOX6|IGM_HUMAN/sp|P01871|IGHM_HUMAN	563/440
LSLHRPALEDLLLGSEAJLTCTLTGLR	4 5 1 0 1	(N(F)(N(H(H(N)(N))(H(N(H(A)))))))	sp|P01876|IGHA1_HUMAN/sp|P0DOX2|IGA2_HUMAN/sp|P01877|IGHA2_HUMAN	144/246/131
JGTAVCATNR	5 4 1 0 0	(N(N(H(H(N(H)))(H(N(H(A)))))))	sp|P05156|CFAI_HUMAN	70
VIHJESTCEQLAK	5 4 1 0 0	(N(N(H(H(N(H)))(H(N(H(A)))))))	sp|P01019|ANGT_HUMAN	47
FSDGLESJSSTQFEVK	9 2 0 0 0	(N(N(H(H(H(H))(H(H(H(H(H)))))))))	sp|P0C0L4|CO4A_HUMAN/sp|P0C0L5|CO4B_HUMAN	226/226
LAGKPTHVJVSVVMAEVDGTCY	5 4 2 0 1	(N(N(H(H(N(H(A))))(H(N(F)(H(A)))))))	sp|P01876|IGHA1_HUMAN	340
TNAELFJQSDIVAHLLSSSSSVIDALQYK	9 2 0 0 0	(N(N(H(H(H(H(H(H(H(H(H)))))))))))	sp|P04114|APOB_HUMAN	3358
LLSJCSK	5 4 1 0 0	(N(N(H(H(N(H)))(H(N(H(A)))))))	sp|Q9Y2L5|TPPC8_HUMAN	1340
TPLTAJITK	4 5 1 0 1	(N(F)(N(H(N)(H(N))(H(N(H(A)))))))	sp|P0DOX2|IGA2_HUMAN/sp|P01877|IGHA2_HUMAN	320/205
JVTAEQAR	5 4 1 0 0	(N(N(H(H(N(H)))(H(N(H(A)))))))	sp|P00748|FA12_HUMAN	249
YKJNSDISSTR	4 3 1 0 0	(N(N(H(H)(H(N(H(A)))))))	sp|P01871|IGHM_HUMAN	46
KVVLHPJYSQVDIGLIK	5 4 2 0 0	(N(N(H(H(N(H(A))))(H(N(H(A)))))))	sp|P00738|HPT_HUMAN	241
TPLTAJITK	4 4 1 0 1	(N(F)(N(H(H(N))(H(N(H(A)))))))	sp|P0DOX2|IGA2_HUMAN/sp|P01877|IGHA2_HUMAN	320/205
FEVDSPVYJATWSASLK	6 5 2 0 0	(N(N(H(H(N(H(A))))(H(N(H))(N(H(A)))))))	sp|P04114|APOB_HUMAN	3895
YKJNSDISSTR	5 3 1 0 0	(N(N(H(H(H))(H(N(H(A)))))))	sp|P01871|IGHM_HUMAN	46
GTAGNALMDGASQLMGEJR	4 3 1 0 0	(N(N(H(H)(H(N(H(A)))))))	sp|P02675|FIBB_HUMAN	394
ADGTVNQIEGEATPVJLTEPAKLEVK	5 4 1 0 1	(N(F)(N(H(H(N(H)))(H(N(H(A)))))))	sp|P05090|APOD_HUMAN	98
SIVQTJCSK	5 4 2 0 0	(N(N(H(H(N(H(A))))(H(N(H(A)))))))	sp|P01042|KNG1_HUMAN	205
LAGKPTHVJVSVVMAEVDGTC	5 5 0 0 1	(N(F)(N(H(N)(H(N(H)))(H(N(H))))))	sp|P01876|IGHA1_HUMAN	340
SYJETK	5 4 2 0 0	(N(N(H(H(N(H(A))))(H(N(H(A)))))))	sp|P04114|APOB_HUMAN	3224
VSJQTLSLFFTVLQDVPVR	5 5 0 0 1	(N(F)(N(H(N)(H(N(H)))(H(N(H))))))	sp|P01023|A2MG_HUMAN	1424
FSDGLESJSSTQFEVK	8 2 0 0 0	(N(N(H(H(H(H)))(H(H(H(H)))))))	sp|P0C0L4|CO4A_HUMAN/sp|P0C0L5|CO4B_HUMAN	226/226
LVPVPITJATLDQITGK	6 5 3 0 1	(N(N(H(H(N(H(A))))(H(N(H(A)))(N(F)(H(A)))))))	sp|P02763|A1AG1_HUMAN	33
RJHSCEPCQTLAVR	5 4 2 0 0	(N(N(H(H(N(H(A))))(H(N(H(A)))))))	sp|P00748|FA12_HUMAN	433
JGSLFAFR	6 3 1 0 0	(N(N(H(H)(H(H)(H(N(H(A))))))))	sp|P04004|VTNC_HUMAN	169
FSDGLESJSSTQFEVK	9 2 0 0 0	(N(N(H(H(H)(H))(H(H(H(H(H))))))))	sp|P0C0L4|CO4A_HUMAN/sp|P0C0L5|CO4B_HUMAN	226/226
YKJNSDISSTR	6 3 1 0 0	(N(N(H(H)(H(H)(H(N(H(A))))))))	sp|P01871|IGHM_HUMAN	46
AJISHK	5 4 2 0 0	(N(N(H(H(N(H(A))))(H(N(H(A)))))))	sp|Q14940|SL9A5_HUMAN/sp|P01031|CO5_HUMAN/sp|P19634|SL9A1_HUMAN	319/741/370
DLQSLEDILHQVEJK	5 4 1 0 0	(N(N(H(H(H))(H(N)(N(H(A)))))))	sp|P02679|FIBG_HUMAN	78
NEEYJK	6 5 3 0 1	(N(N(H(H(N(H(A))))(H(N(H(A)))(N(F)(H(A)))))))	sp|P02763|A1AG1_HUMAN/sp|P19652|A1AG2_HUMAN	56/56
CGLVPVLAENYJK	5 4 1 0 0	(N(N(H(H(N(H)))(H(N(H(A)))))))	sp|P02787|TRFE_HUMAN	432
SYJETK	5 4 2 0 1	(N(F)(N(H(H(N(H(A))))(H(N(H(A)))))))	sp|P04114|APOB_HUMAN	3224
SLEDILHQVEJK	5 4 1 0 0	(N(N(H(H(N(H)))(H(N(H(A)))))))	sp|P02679|FIBG_HUMAN	78
FJLTEIPEAQIHEGFQELLR	5 4 2 0 0	(N(N(H(H(N(H(A))))(H(N(H(A)))))))	sp|P01009|A1AT_HUMAN	107
LSLHRPALEDLLLGSEAJLTCTLTGLR	4 5 0 0 0	(N(N(H(N)(H(N))(H(N(H))))))	sp|P01876|IGHA1_HUMAN/sp|P0DOX2|IGA2_HUMAN/sp|P01877|IGHA2_HUMAN	144/246/131
VIHJESTCEQLAK	5 4 2 0 0	(N(N(H(H(N(H(A))))(H(N(H(A)))))))	sp|P01019|ANGT_HUMAN	47
LSLGAHJTTLTEILK	5 4 2 0 0	(N(N(H(H(N(H(A))))(H(N(H(A)))))))	sp|P01011|AACT_HUMAN	93
FSDGLESJSSTQFEVK	8 2 0 0 0	(N(N(H(H(H))(H(H)(H)(H(H))))))	sp|P0C0L4|CO4A_HUMAN/sp|P0C0L5|CO4B_HUMAN	226/226
KLHINHNJLTESVGPLPK	5 4 2 0 1	(N(F)(N(H(H(N(H(A))))(H(N(H(A)))))))	sp|P51884|LUM_HUMAN	127
AAIPSALDTJSSK	5 4 2 0 0	(N(N(H(H(N(H(A))))(H(N(H(A)))))))	sp|Q08380|LG3BP_HUMAN	551
EJISDPTSPLR	5 3 1 0 1	(N(F)(N(H(H(H))(H(N(H(A)))))))	sp|P01591|IGJ_HUMAN	71
JNSDISSTR	5 3 1 0 1	(N(F)(N(H(H(H))(H(N(H(A)))))))	sp|P01871|IGHM_HUMAN	46
HJFSHCCSK	5 4 1 0 0	(N(N(H(H(N(H)))(H(N(H(A)))))))	sp|P43652|AFAM_HUMAN	109
FSDGLESJSSTQFEVK	9 2 0 0 0	(N(N(H(H(H(H(H(H(H(H(H)))))))))))	sp|P0C0L4|CO4A_HUMAN/sp|P0C0L5|CO4B_HUMAN	226/226
HJSTGCLR	6 5 1 0 0	(N(N(H(H(N(H(A))))(H(N(H))(N(H))))))	sp|P10909|CLUS_HUMAN	291
VVLHPJYSQVDIGLIK	5 4 1 0 1	(N(N(H(H(N(H)))(H(N(F)(H(A)))))))	sp|P00738|HPT_HUMAN	241
JNSDISSTR	6 3 1 0 0	(N(N(H(H(H(H)))(H(N(H(A)))))))	sp|P01871|IGHM_HUMAN	46
YKJNSDISSTR	5 4 0 0 1	(N(F)(N(H(H(N))(H(N(H(H)))))))	sp|P01871|IGHM_HUMAN	46

## Sheet: Supplementary Table 3
Supplementary table 3: Multi-lectin affinity chromtography based enrichement of glycopeptides was perfromed and data was searched with tryptic cleavage specificity. Peptide sequence is provided in the column A, where J is the Aspragine on which the glycan was localized. Column B provides the composition of the glycan at the glycosylation site, where H, N, A, G, F are in sequence and H=Hexose, N=H…
Peptide sequence	Glycan composition (H,N,A,G,F)	Plausible Structure	Proteins (Uniprot accession and Id)	Glycosyaltion Site
VVLHPJYSQVDIGLIK	5 4 0 0 2	(N(N(H(H(N(H(F))))(H(N(H(F)))))))	sp|P00738|HPT_HUMAN	241
SLGNVJFTVSAEALESQELCGTEVPSVPEHGRK	5 2 0 0 0	(N(N(H(H(H(H(H)))))))	sp|P01023|A2MG_HUMAN	869
VDKDLQSLEDILHQVEJK	4 4 1 0 0	(N(N(H(H(N))(H(N(H(A)))))))	sp|P02679|FIBG_HUMAN	78
PREEQFJSTFR	3 4 0 0 1	(N(F)(N(H(H(N))(H(N)))))	sp|P01859|IGHG2_HUMAN	176
TKPREEQFJSTFR	3 4 0 0 1	(N(F)(N(H(H(N))(H(N)))))	sp|P01859|IGHG2_HUMAN	176
ADTHDEILEGLNFJLTEIPEAQIHEGFQELLR	5 4 1 0 0	(N(N(H(H(N(H)))(H(N(H(A)))))))	sp|P01009|A1AT_HUMAN	107
FJSSYLQGTNQITGR	5 2 0 0 0	(N(N(H(H(H)(H(H))))))	sp|P04114|APOB_HUMAN	1523
LSLHRPALEDLLLGSEAJLTCTLTGLR	5 2 0 0 0	(N(N(H(H(H))(H(H)))))	sp|P01876|IGHA1_HUMAN/sp|P0DOX2|IGA2_HUMAN/sp|P01877|IGHA2_HUMAN	144/246/131
EEQYJSTYR	4 5 0 0 0	(N(N(H(N)(H(N))(H(N(H))))))	sp|P0DOX5|IGG1_HUMAN/sp|P01857|IGHG1_HUMAN	299/180
EEQFJSTYR	4 4 0 0 0	(N(N(H(H(N))(H(N(H))))))	sp|P01861|IGHG4_HUMAN	177
PALEDLLLGSEAJLTCTLTGLR	8 2 0 0 0	(N(N(H(H(H(H(H(H(H(H))))))))))	sp|P01876|IGHA1_HUMAN/sp|P0DOX2|IGA2_HUMAN/sp|P01877|IGHA2_HUMAN	144/246/131
HSHNJJSSDLHPHK	5 4 2 0 1	(N(F)(N(H(H(N(H(A))))(H(N(H(A)))))))	sp|P04196|HRG_HUMAN	344
LAGKPTHVJVSVVMAEVDGTCY	5 2 0 0 0	(N(N(H(H(H(H(H)))))))	sp|P01876|IGHA1_HUMAN	340
HSHNJJSSDLHPHK	5 4 2 0 0	(N(N(H(H(N(H(A))))(H(N(H(A)))))))	sp|P04196|HRG_HUMAN	344
TKPREEQFJSTFR	4 4 0 0 1	(N(F)(N(H(H(N))(H(N(H))))))	sp|P01859|IGHG2_HUMAN	176
EEQFJSTYR	3 4 0 0 1	(N(F)(N(H(H(N))(H(N)))))	sp|P01861|IGHG4_HUMAN	177
EEQYJSTYR	3 4 0 0 1	(N(F)(N(H(H(N))(H(N)))))	sp|P0DOX5|IGG1_HUMAN/sp|P01857|IGHG1_HUMAN	299/180
LSLHRPALEDLLLGSEAJLTCTLTGLR	5 4 1 0 1	(N(F)(N(H(H(N(H)))(H(N(H(A)))))))	sp|P01876|IGHA1_HUMAN/sp|P0DOX2|IGA2_HUMAN/sp|P01877|IGHA2_HUMAN	144/246/131
MVSHHJLTTGATLINEQWLLTTAK	5 4 2 0 0	(N(N(H(H(N(H(A))))(H(N(H(A)))))))	sp|P00739|HPTR_HUMAN/sp|P00738|HPT_HUMAN	126/184
VFHIHJESWVLLTPK	5 2 0 0 0	(N(N(H(H(H))(H(H)))))	sp|O75882|ATRN_HUMAN	428
EEQFJSTFR	4 4 0 0 1	(N(F)(N(H(H(N))(H(N(H))))))	sp|P01859|IGHG2_HUMAN	176
TPLTAJITK	5 5 1 0 1	(N(F)(N(H(H(N)(N(H)))(H(N(H(A)))))))	sp|P0DOX2|IGA2_HUMAN/sp|P01877|IGHA2_HUMAN	320/205
PALEDLLLGSEAJLTCTLTGLR	5 4 1 0 0	(N(N(H(H(N(H)))(H(N(H(A)))))))	sp|P01876|IGHA1_HUMAN/sp|P0DOX2|IGA2_HUMAN/sp|P01877|IGHA2_HUMAN	144/246/131
TVLTPATNHMGJVTFTIPANR	5 2 0 0 0	(N(N(H(H(H))(H(H)))))	sp|P01024|CO3_HUMAN	85
SVQEIQATFFYFTPJKTEDTIFLR	6 5 3 0 0	(N(N(H(H(N(H(A))))(H(N(H(A)))(N(H(A)))))))	sp|P02763|A1AG1_HUMAN/sp|P19652|A1AG2_HUMAN	72/72
LSLHRPALEDLLLGSEAJLTCTLTGLR	5 2 0 0 0	(N(N(H(H)(H(H)(H)))))	sp|P01876|IGHA1_HUMAN/sp|P0DOX2|IGA2_HUMAN/sp|P01877|IGHA2_HUMAN	144/246/131
TVLTPATNHMGJVTFTIPANR	6 2 0 0 0	(N(N(H(H)(H(H)(H(H))))))	sp|P01024|CO3_HUMAN	85
MVSHHJLTTGATLINEQWLLTTAK	5 4 1 0 0	(N(N(H(H(N(H)))(H(N(H(A)))))))	sp|P00739|HPTR_HUMAN/sp|P00738|HPT_HUMAN	126/184
TVLTPATNHMGJVTFTIPANR	7 2 0 0 0	(N(N(H(H(H))(H(H)(H)(H)))))	sp|P01024|CO3_HUMAN	85
YLGJATAIFFLPDEGK	5 4 1 0 0	(N(N(H(H(N(H)))(H(N(H(A)))))))	sp|P01009|A1AT_HUMAN	271
FSDGLESJSSTQFEVK	8 2 0 0 0	(N(N(H(H(H(H)))(H(H(H(H)))))))	sp|P0C0L4|CO4A_HUMAN/sp|P0C0L5|CO4B_HUMAN	226/226
SRYPHKPEIJSTTHPGADLQEJFCR	5 4 2 0 0	(N(N(H(H(N(H(A))))(H(N(H(A)))))))	sp|P00734|THRB_HUMAN	143
GFGVAIVGJYTAALPTEAALR	5 4 2 0 0	(N(N(H(H(N(H(A))))(H(N(H(A)))))))	sp|Q96PD5|PGRP2_HUMAN	485
QSVPAHFVALJGSK	5 2 0 0 0	(N(N(H(H(H))(H(H)))))	sp|P06681|CO2_HUMAN	621
LSLHRPALEDLLLGSEAJLTCTLTGLR	4 5 0 0 0	(N(N(H(N)(H(N(H))(N(H))))))	sp|P01876|IGHA1_HUMAN/sp|P0DOX2|IGA2_HUMAN/sp|P01877|IGHA2_HUMAN	144/246/131
LSLHRPALEDLLLGSEAJLTCTLTGLR	5 4 2 0 0	(N(N(H(H(N(H(A))))(H(N(H(A)))))))	sp|P01876|IGHA1_HUMAN/sp|P0DOX2|IGA2_HUMAN/sp|P01877|IGHA2_HUMAN	144/246/131
EEQYJSTYR	4 4 0 0 0	(N(N(H(H(N))(H(N(H))))))	sp|P0DOX5|IGG1_HUMAN/sp|P01857|IGHG1_HUMAN	299/180
LSLHRPALEDLLLGSEAJLTCTLTGLR	4 4 1 0 0	(N(N(H(H(N))(H(N(H(A)))))))	sp|P01876|IGHA1_HUMAN/sp|P0DOX2|IGA2_HUMAN/sp|P01877|IGHA2_HUMAN	144/246/131
YLGJATAIFFLPDEGK	5 4 2 0 0	(N(N(H(H(N(H(A))))(H(N(H(A)))))))	sp|P01009|A1AT_HUMAN	271
YKJNSDISSTR	5 2 0 0 0	(N(N(H(H(H))(H(H)))))	sp|P01871|IGHM_HUMAN	46
EEQYJSTYR	2 3 0 0 1	(N(F)(N(H(H(N)))))	sp|P0DOX5|IGG1_HUMAN/sp|P01857|IGHG1_HUMAN	299/180
TPLTAJITK	5 4 1 0 1	(N(F)(N(H(H(N(H)))(H(N(H(A)))))))	sp|P0DOX2|IGA2_HUMAN/sp|P01877|IGHA2_HUMAN	320/205
EEQFJSTFR	6 4 0 0 0	(N(N(H(H(N(H)))(H(N(H(H)))))))	sp|P01859|IGHG2_HUMAN	176
HJFSHCCSK	5 4 2 0 0	(N(N(H(H(N(H(A))))(H(N(H(A)))))))	sp|P43652|AFAM_HUMAN	109
KLPPGLLAJFTLLR	5 4 2 0 0	(N(N(H(H(N(H(A))))(H(N(H(A)))))))	sp|P02750|A2GL_HUMAN	186
EEQYJSTYR	3 5 0 0 1	(N(F)(N(H(N)(H(N))(H(N)))))	sp|P0DOX5|IGG1_HUMAN/sp|P01857|IGHG1_HUMAN	299/180
EEQYJSTYR	4 5 0 0 1	(N(F)(N(H(N)(H(N))(H(N(H))))))	sp|P0DOX5|IGG1_HUMAN/sp|P01857|IGHG1_HUMAN	299/180
HYTJSSQDVTVPCR	5 4 1 0 1	(N(F)(N(H(H(N(H)))(H(N(H(A)))))))	sp|P0DOX2|IGA2_HUMAN/sp|P01877|IGHA2_HUMAN	207/92
EEQFJSTFR	3 4 0 0 1	(N(F)(N(H(H(N))(H(N)))))	sp|P01859|IGHG2_HUMAN	176
EEQYJSTYR	4 4 0 0 1	(N(F)(N(H(H(N))(H(N(H))))))	sp|P0DOX5|IGG1_HUMAN/sp|P01857|IGHG1_HUMAN	299/180
TKPREEQYJSTYR	3 4 0 0 1	(N(F)(N(H(H(N))(H(N)))))	sp|P0DOX5|IGG1_HUMAN/sp|P01857|IGHG1_HUMAN	299/180
EEQFJSTFR	3 5 0 0 1	(N(F)(N(H(N)(H(N))(H(N)))))	sp|P01859|IGHG2_HUMAN	176
STGKPTLYJVSLVMSDTAGTCY	6 2 0 0 0	(N(N(H(H(H(H))(H(H))))))	sp|P0DOX6|IGM_HUMAN/sp|P01871|IGHM_HUMAN	563/440
JISDGFDGIPDNVDAALALPAHSYSGR	6 5 3 0 0	(N(N(H(H(N(H(A))))(H(N(H(A)))(N(H(A)))))))	sp|P04004|VTNC_HUMAN	242
EEQFJSTFR	3 5 0 0 1	(N(F)(N(H(H(N))(H(N)(N)))))	sp|P01859|IGHG2_HUMAN	176
IIVPLNNREJISDPTSPLR	5 3 0 0 1	(N(F)(N(H(H(H))(H(N(H))))))	sp|P01591|IGJ_HUMAN	71
PALEDLLLGSEAJLTCTLTGLR	4 5 1 0 0	(N(N(H(N)(H(N(H))(N(H(A)))))))	sp|P01876|IGHA1_HUMAN/sp|P0DOX2|IGA2_HUMAN/sp|P01877|IGHA2_HUMAN	144/246/131
SPYYJVSDEISFHCYDGYTLR	5 4 2 0 0	(N(N(H(H(N(H(A))))(H(N(H(A)))))))	sp|P00751|CFAB_HUMAN	122
LSLHRPALEDLLLGSEAJLTCTLTGLR	6 2 0 0 0	(N(N(H(H)(H(H)(H(H))))))	sp|P01876|IGHA1_HUMAN/sp|P0DOX2|IGA2_HUMAN/sp|P01877|IGHA2_HUMAN	144/246/131
LSLHRPALEDLLLGSEAJLTCTLTGLR	6 2 0 0 0	(N(N(H(H(H))(H(H)(H)))))	sp|P01876|IGHA1_HUMAN/sp|P0DOX2|IGA2_HUMAN/sp|P01877|IGHA2_HUMAN	144/246/131
FSDGLESJSSTQFEVK	9 2 0 0 0	(N(N(H(H)(H(H)(H(H(H(H(H)))))))))	sp|P0C0L4|CO4A_HUMAN/sp|P0C0L5|CO4B_HUMAN	226/226
ALPQPQJVTSLLGCTH	5 4 2 0 1	(N(F)(N(H(H(N(H(A))))(H(N(H(A)))))))	sp|P02790|HEMO_HUMAN	453
TVLTPATNHMGJVTFTIPANR	6 2 0 0 0	(N(N(H(H(H))(H(H(H))))))	sp|P01024|CO3_HUMAN	85
LSLHRPALEDLLLGSEAJLTCTLTGLR	9 2 0 0 0	(N(N(H(H)(H(H)(H(H(H(H(H)))))))))	sp|P01876|IGHA1_HUMAN/sp|P0DOX2|IGA2_HUMAN/sp|P01877|IGHA2_HUMAN	144/246/131
JNSDISSTR	5 4 1 0 0	(N(N(H(H(N(H)))(H(N(H(A)))))))	sp|P01871|IGHM_HUMAN	46
SSVITLNTNAELFJQSDIVAHLLSSSSSVIDALQYK	9 2 0 0 0	(N(N(H(H)(H(H(H))(H(H(H(H))))))))	sp|P04114|APOB_HUMAN	3358
EEQYJSTYR	5 4 0 0 0	(N(N(H(H(H))(H(N)(N(H))))))	sp|P0DOX5|IGG1_HUMAN/sp|P01857|IGHG1_HUMAN	299/180
EEQFJSTFR	5 4 1 0 0	(N(N(H(H(N(H)))(H(N(H(A)))))))	sp|P01859|IGHG2_HUMAN	176
QLAHQSJSTNIFFSPVSIATAFAMLSLGTK	6 4 1 0 1	(N(N(H(H(N(H(H))))(H(N(F)(H(A)))))))	sp|P01009|A1AT_HUMAN	70
TVLTPATNHMGJVTFTIPANR	6 2 0 0 0	(N(N(H(H)(H(H(H(H)))))))	sp|P01024|CO3_HUMAN	85
SLGNVJFTVSAEALESQELCGTEVPSVPEHGR	4 4 0 0 0	(N(N(H(H(N))(H(N(H))))))	sp|P01023|A2MG_HUMAN	869
EEQYJSTYR	4 4 0 0 1	(N(F)(N(H(H(N(H))(N(H))))))	sp|P0DOX5|IGG1_HUMAN/sp|P01857|IGHG1_HUMAN	299/180
LSLHRPALEDLLLGSEAJLTCTLTGLR	5 5 1 0 0	(N(N(H(N)(H(N(H)))(H(N(H(A)))))))	sp|P01876|IGHA1_HUMAN/sp|P0DOX2|IGA2_HUMAN/sp|P01877|IGHA2_HUMAN	144/246/131
MVSHHJLTTGATLINEQWLLTTAK	6 5 3 0 0	(N(N(H(H(N(H(A))))(H(N(H(A)))(N(H(A)))))))	sp|P00739|HPTR_HUMAN/sp|P00738|HPT_HUMAN	126/184
EEQFJSTFR	6 2 0 0 0	(N(N(H(H)(H(H)(H)(H)))))	sp|P01859|IGHG2_HUMAN	176
VYIHPFHLVIHJESTCEQLAK	5 4 2 0 0	(N(N(H(H(N(H(A))))(H(N(H(A)))))))	sp|P01019|ANGT_HUMAN	47
FSDGLESJSSTQFEVK	9 2 0 0 0	(N(N(H(H(H)(H))(H(H(H))(H(H))))))	sp|P0C0L4|CO4A_HUMAN/sp|P0C0L5|CO4B_HUMAN	226/226
TVLTPATNHMGJVTFTIPANR	6 2 0 0 0	(N(N(H(H)(H(H)(H)(H)))))	sp|P01024|CO3_HUMAN	85
VDKDLQSLEDILHQVEJK	4 4 0 0 2	(N(N(H(H(N(F)))(H(N(H)(F))))))	sp|P02679|FIBG_HUMAN	78
VDKDLQSLEDILHQVEJK	3 3 0 0 0	(N(N(H(H)(H(N)))))	sp|P02679|FIBG_HUMAN	78
LSLHRPALEDLLLGSEAJLTCTLTGLR	4 3 0 0 0	(N(N(H(H)(H(N(H))))))	sp|P01876|IGHA1_HUMAN/sp|P0DOX2|IGA2_HUMAN/sp|P01877|IGHA2_HUMAN	144/246/131
JISDGFDGIPDNVDAALALPAHSYSGR	5 4 1 0 0	(N(N(H(H(N(H)))(H(N(H(A)))))))	sp|P04004|VTNC_HUMAN	242
SLGNVJFTVSAEALESQELCGTEVPSVPEHGR	5 2 0 0 0	(N(N(H(H(H))(H(H)))))	sp|P01023|A2MG_HUMAN	869
FSDGLESJSSTQFEVK	7 2 0 0 0	(N(N(H(H)(H(H(H(H(H))))))))	sp|P0C0L4|CO4A_HUMAN/sp|P0C0L5|CO4B_HUMAN	226/226
GTAGNALMDGASQLMGEJR	5 4 1 0 0	(N(N(H(H(N(H)))(H(N(H(A)))))))	sp|P02675|FIBB_HUMAN	394
FSDGLESJSSTQFEVKK	9 2 0 0 0	(N(N(H(H(H(H)))(H(H(H))(H(H))))))	sp|P0C0L4|CO4A_HUMAN/sp|P0C0L5|CO4B_HUMAN	226/226
STGKPTLYJVSLVMSDTAGTCY	6 2 0 0 0	(N(N(H(H)(H(H)(H(H))))))	sp|P0DOX6|IGM_HUMAN/sp|P01871|IGHM_HUMAN	563/440
EEQFJSTFR	3 4 0 0 1	(N(F)(N(H(H(N)(N(H))))))	sp|P01859|IGHG2_HUMAN	176
EEQFJSTFR	3 3 0 0 0	(N(N(H(H)(H(N)))))	sp|P01859|IGHG2_HUMAN	176
EEQFJSTFR	3 3 0 0 1	(N(F)(N(H(H)(H(N)))))	sp|P01859|IGHG2_HUMAN	176
EEQFJSTFR	4 5 0 0 1	(N(F)(N(H(N)(H(N))(H(N(H))))))	sp|P01859|IGHG2_HUMAN	176
AALAAFNAQNJGSNFQLEEISR	6 4 1 0 1	(N(N(H(H(N(H(H))))(H(N(F)(H(A)))))))	sp|P02765|FETUA_HUMAN	176
QSVPAHFVALJGSK	7 2 0 0 0	(N(N(H(H(H)(H))(H(H)(H)))))	sp|P06681|CO2_HUMAN	621
NLFLJHSEJATAK	5 4 2 0 0	(N(N(H(H(N(H(A))))(H(N(H(A)))))))	sp|P00739|HPTR_HUMAN/sp|P00738|HPT_HUMAN	149/207
QQQHLFGSJVTDCSGJFCLFR	5 4 1 0 0	(N(N(H(H(N(H)))(H(N(H(A)))))))	sp|P02787|TRFE_HUMAN	630
FSDGLESJSSTQFEVK	9 2 0 0 0	(N(N(H(H(H)(H(H)))(H(H)(H(H))))))	sp|P0C0L4|CO4A_HUMAN/sp|P0C0L5|CO4B_HUMAN	226/226
LSLHRPALEDLLLGSEAJLTCTLTGLR	5 2 0 0 0	(N(N(H(H)(H(H(H))))))	sp|P01876|IGHA1_HUMAN/sp|P0DOX2|IGA2_HUMAN/sp|P01877|IGHA2_HUMAN	144/246/131
QPIDJVSR	5 4 1 0 2	(N(N(H(H(N(H)(F)))(H(N(F)(H(A)))))))	sp|Q8N201|INT1_HUMAN	345
ELHHLQEQJVSNAFLDKGEFYIGSK	5 4 1 0 0	(N(N(H(H(N(H)))(H(N(H(A)))))))	sp|P00450|CERU_HUMAN	762
NEEYJK	5 4 2 0 0	(N(N(H(H(N(H(A))))(H(N(H(A)))))))	sp|P02763|A1AG1_HUMAN/sp|P19652|A1AG2_HUMAN	56/56
LAGKPTHVJVSVVMAEVDGTCY	5 2 0 0 0	(N(N(H(H(H))(H(H)))))	sp|P01876|IGHA1_HUMAN	340
LSLHRPALEDLLLGSEAJLTCTLTGLR	8 2 0 0 0	(N(N(H(H)(H(H)(H(H(H(H))))))))	sp|P01876|IGHA1_HUMAN/sp|P0DOX2|IGA2_HUMAN/sp|P01877|IGHA2_HUMAN	144/246/131
NEEYJK	6 5 3 0 0	(N(N(H(H(N(H(A))))(H(N(H(A)))(N(H(A)))))))	sp|P02763|A1AG1_HUMAN/sp|P19652|A1AG2_HUMAN	56/56
LAGKPTHVJVSVVMAEVDGTCY	5 4 1 0 1	(N(F)(N(H(H(N(H)))(H(N(H(A)))))))	sp|P01876|IGHA1_HUMAN	340
VVLHPJYSQVDIGLIK	5 4 2 0 0	(N(N(H(H(N(H(A))))(H(N(H(A)))))))	sp|P00738|HPT_HUMAN	241
ELHHLQEQJVSNAFLDKGEFYIGSK	6 5 3 0 0	(N(N(H(H(N(H(A))))(H(N(H(A)))(N(H(A)))))))	sp|P00450|CERU_HUMAN	762
EEQFJSTFR	4 4 0 0 0	(N(N(H(H(N))(H(N(H))))))	sp|P01859|IGHG2_HUMAN	176
EEQFJSTFR	5 4 0 0 0	(N(N(H(H(N(H)))(H(N(H))))))	sp|P01859|IGHG2_HUMAN	176
EEQYJSTYR	4 5 0 0 1	(N(F)(N(H(N)(H(N(H))(N(H))))))	sp|P0DOX5|IGG1_HUMAN/sp|P01857|IGHG1_HUMAN	299/180
TVLTPATNHMGJVTFTIPANR	6 2 0 0 0	(N(N(H(H(H)(H(H(H)))))))	sp|P01024|CO3_HUMAN	85
QVLFLDTVYGJCSTHFTVK	7 2 0 0 0	(N(N(H(H)(H(H(H(H(H))))))))	sp|P04114|APOB_HUMAN	185
LSLHRPALEDLLLGSEAJLTCTLTGLR	5 5 1 0 0	(N(N(H(H(N)(N(H)))(H(N(H(A)))))))	sp|P01876|IGHA1_HUMAN/sp|P0DOX2|IGA2_HUMAN/sp|P01877|IGHA2_HUMAN	144/246/131
AALAAFNAQNJGSNFQLEEISR	5 4 1 0 0	(N(N(H(H(N(H)))(H(N(H(A)))))))	sp|P02765|FETUA_HUMAN	176
QVETIRNLVDSYMSIIJK	3 3 0 0 0	(N(N(H(H)(H(N)))))	sp|Q9UQ16|DYN3_HUMAN	674
LSLHRPALEDLLLGSEAJLTCTLTGLR	6 4 0 0 0	(N(N(H(H(H)(H))(H(N)(N(H))))))	sp|P01876|IGHA1_HUMAN/sp|P0DOX2|IGA2_HUMAN/sp|P01877|IGHA2_HUMAN	144/246/131
VVLHPJYSQVDIGLIK	6 5 2 0 0	(N(N(H(H(N(H(A))))(H(N(H))(N(H(A)))))))	sp|P00738|HPT_HUMAN	241
LNAENJATFYFK	5 4 2 0 0	(N(N(H(H(N(H(A))))(H(N(H(A)))))))	sp|P01042|KNG1_HUMAN	294
SLGNVJFTVSAEALESQELCGTEVPSVPEHGRK	5 2 0 0 0	(N(N(H(H(H)(H(H))))))	sp|P01023|A2MG_HUMAN	869
LDGSJK	5 4 1 0 2	(N(N(H(H(N(H)(F)))(H(N(F)(H(A)))))))	sp|Q96IV0|NGLY1_HUMAN	117
EEQFJSTFR	3 4 0 0 0	(N(N(H(H(N))(H(N)))))	sp|P01859|IGHG2_HUMAN	176
EEQYJSTYR	3 3 0 0 1	(N(F)(N(H(H)(H(N)))))	sp|P0DOX5|IGG1_HUMAN/sp|P01857|IGHG1_HUMAN	299/180
EEQYJSTYR	5 4 0 0 1	(N(F)(N(H(H(N))(H(N(H(H)))))))	sp|P0DOX5|IGG1_HUMAN/sp|P01857|IGHG1_HUMAN	299/180
VYKPSAGJNSLYR	5 4 2 0 1	(N(F)(N(H(H(N(H(A))))(H(N(H(A)))))))	sp|P02749|APOH_HUMAN	162
TVLTPATNHMGJVTFTIPANR	7 2 0 0 0	(N(N(H(H(H(H(H(H(H)))))))))	sp|P01024|CO3_HUMAN	85
VVLHPJYSQVDIGLIK	5 4 1 0 0	(N(N(H(H(N(H)))(H(N(H(A)))))))	sp|P00738|HPT_HUMAN	241
QVLFLDTVYGJCSTHFTVK	5 2 0 0 0	(N(N(H(H(H(H(H)))))))	sp|P04114|APOB_HUMAN	185
SLGNVJFTVSAEALESQELCGTEVPSVPEHGRK	4 3 1 0 0	(N(N(H(H)(H(N(H(A)))))))	sp|P01023|A2MG_HUMAN	869
VSJQTLSLFFTVLQDVPVR	5 4 1 0 0	(N(N(H(H(N(H)))(H(N(H(A)))))))	sp|P01023|A2MG_HUMAN	1424
YLGJATAIFFLPDEGK	4 3 1 0 0	(N(N(H(H)(H(N(H(A)))))))	sp|P01009|A1AT_HUMAN	271
SLGNVJFTVSAEALESQELCGTEVPSVPEHGRK	5 4 1 0 0	(N(N(H(H(N(H)))(H(N(H(A)))))))	sp|P01023|A2MG_HUMAN	869
VDKDLQSLEDILHQVEJK	5 4 2 0 0	(N(N(H(H(N(H(A))))(H(N(H(A)))))))	sp|P02679|FIBG_HUMAN	78
FJLTETSEAEIHQSFQHLLR	6 5 3 0 0	(N(N(H(H(N(H(A))))(H(N(H(A)))(N(H(A)))))))	sp|P01011|AACT_HUMAN	106
TVLTPATNHMGJVTFTIPANR	7 2 0 0 0	(N(N(H(H(H)(H))(H(H)(H)))))	sp|P01024|CO3_HUMAN	85
FSDGLESJSSTQFEVK	9 2 0 0 0	(N(N(H(H(H))(H(H(H(H(H(H)))))))))	sp|P0C0L4|CO4A_HUMAN/sp|P0C0L5|CO4B_HUMAN	226/226
VVLHPJYSQVDIGLIK	6 5 1 0 0	(N(N(H(H(N(H(A))))(H(N(H))(N(H))))))	sp|P00738|HPT_HUMAN	241
FSDGLESJSSTQFEVK	8 2 0 0 0	(N(N(H(H(H))(H(H)(H(H(H)))))))	sp|P0C0L4|CO4A_HUMAN/sp|P0C0L5|CO4B_HUMAN	226/226
QVLFLDTVYGJCSTHFTVK	5 2 0 0 0	(N(N(H(H(H)(H(H))))))	sp|P04114|APOB_HUMAN	185
JGSLFAFR	4 3 1 0 0	(N(N(H(H)(H(N(H(A)))))))	sp|P04004|VTNC_HUMAN	169
GTAGNALMDGASQLMGEJR	5 4 0 0 0	(N(N(H(H(N(H)))(H(N(H))))))	sp|P02675|FIBB_HUMAN	394
NEEYJK	6 5 2 0 0	(N(N(H(H(N(H(A))))(H(N(H))(N(H(A)))))))	sp|P02763|A1AG1_HUMAN/sp|P19652|A1AG2_HUMAN	56/56
YKJNSDISSTR	4 3 1 0 1	(N(F)(N(H(H)(H(N(H(A)))))))	sp|P01871|IGHM_HUMAN	46
SLGNVJFTVSAEALESQELCGTEVPSVPEHGR	6 3 1 0 0	(N(N(H(H)(H(H)(H(N(H(A))))))))	sp|P01023|A2MG_HUMAN	869
JGSLFAFR	5 3 1 0 0	(N(N(H(H(H))(H(N(H(A)))))))	sp|P04004|VTNC_HUMAN	169
EEQFJSTFR	6 4 0 0 0	(N(N(H(H(N(H)))(H(H(N(H)))))))	sp|P01859|IGHG2_HUMAN	176
VDKDLQSLEDILHQVEJK	5 4 0 0 0	(N(N(H(H(N))(H(N(H(H)))))))	sp|P02679|FIBG_HUMAN	78
SWPAVGJCSSALR	5 4 1 0 0	(N(N(H(H(N(H)))(H(N(H(A)))))))	sp|P02790|HEMO_HUMAN	187
SWPAVGJCSSALR	5 4 2 0 0	(N(N(H(H(N(H(A))))(H(N(H(A)))))))	sp|P02790|HEMO_HUMAN	187
VYIHPFHLVIHJESTCEQLAK	5 4 1 0 0	(N(N(H(H(N(H)))(H(N(H(A)))))))	sp|P01019|ANGT_HUMAN	47
EEQFJSTFR	4 3 0 0 1	(N(F)(N(H(H)(H(N(H))))))	sp|P01859|IGHG2_HUMAN	176
WVSJKTEGR	5 4 1 0 0	(N(N(H(H(N(H)))(H(N(H(A)))))))	sp|P01008|ANT3_HUMAN	224
EEQFJSTFR	5 4 0 0 1	(N(F)(N(H(H(H))(H(N)(N(H))))))	sp|P01859|IGHG2_HUMAN	176
EEQYJSTYR	3 4 0 0 1	(N(F)(N(H(H)(N)(H(N)))))	sp|P0DOX5|IGG1_HUMAN/sp|P01857|IGHG1_HUMAN	299/180
EEQFJSTYR	4 4 0 0 1	(N(F)(N(H(H(N))(H(N(H))))))	sp|P01861|IGHG4_HUMAN	177
VDKDLQSLEDILHQVEJK	5 4 2 0 1	(N(F)(N(H(H(N(H(A))))(H(N(H(A)))))))	sp|P02679|FIBG_HUMAN	78
EEQFJSTYR	3 5 0 0 1	(N(F)(N(H(N)(H(N))(H(N)))))	sp|P01861|IGHG4_HUMAN	177
JGSLFAFR	5 4 1 0 0	(N(N(H(H(N(H)))(H(N(H(A)))))))	sp|P04004|VTNC_HUMAN	169
YKJNSDISSTR	3 5 0 0 1	(N(F)(N(H(N)(H(N))(H(N)))))	sp|P01871|IGHM_HUMAN	46
EEQFJSTFR	4 5 0 0 0	(N(N(H(H(N))(H(N)(N(H))))))	sp|P01859|IGHG2_HUMAN	176
EEQFJSTFR	4 4 1 0 1	(N(F)(N(H(H(N))(H(N(H(A)))))))	sp|P01859|IGHG2_HUMAN	176
EEQYJSTYR	3 5 0 0 1	(N(F)(N(H(H(N))(H(N)(N)))))	sp|P0DOX5|IGG1_HUMAN/sp|P01857|IGHG1_HUMAN	299/180
TVLTPATNHMGJVTFTIPANR	5 2 0 0 0	(N(N(H(H)(H(H)(H)))))	sp|P01024|CO3_HUMAN	85
KVCQDCPLLAPLJDTR	5 4 2 0 0	(N(N(H(H(N(H(A))))(H(N(H(A)))))))	sp|P02765|FETUA_HUMAN	156
GTAGNALMDGASQLMGEJR	4 3 1 0 0	(N(N(H(H)(H(N(H(A)))))))	sp|P02675|FIBB_HUMAN	394
IDSTGJVTNELR	9 2 0 0 0	(N(N(H(H(H))(H(H(H(H(H(H)))))))))	sp|O75882|ATRN_HUMAN	416
TVLTPATNHMGJVTFTIPANR	5 2 0 0 0	(N(N(H(H(H(H(H)))))))	sp|P01024|CO3_HUMAN	85
SVQEIQATFFYFTPJKTEDTIFLR	6 4 1 0 1	(N(N(H(H(N(H(H))))(H(N(F)(H(A)))))))	sp|P02763|A1AG1_HUMAN/sp|P19652|A1AG2_HUMAN	72/72
PYTFHSHGITYYKEHEGAIYPDJTTDFQR	5 4 2 0 1	(N(F)(N(H(H(N(H(A))))(H(N(H(A)))))))	sp|P00450|CERU_HUMAN	138
VDKDLQSLEDILHQVEJK	3 3 0 0 0	(N(N(H(H(N(H))))))	sp|P02679|FIBG_HUMAN	78
LAGKPTHVJVSVVMAEVDGTCY	5 2 0 0 0	(N(N(H(H)(H(H(H))))))	sp|P01876|IGHA1_HUMAN	340
LPTQJITFQTESSVAEQEAEFQSPK	5 4 2 0 0	(N(N(H(H(N(H(A))))(H(N(H(A)))))))	sp|Q14624|ITIH4_HUMAN	517
VDKDLQSLEDILHQVEJK	3 4 0 0 0	(N(N(H(H(N))(H(N)))))	sp|P02679|FIBG_HUMAN	78
VVLHPJYSQVDIGLIK	6 5 3 0 0	(N(N(H(H(N(H(A))))(H(N(H(A)))(N(H(A)))))))	sp|P00738|HPT_HUMAN	241
EEQFJSTFR	5 4 0 0 1	(N(F)(N(H(H(N(H)))(H(N(H))))))	sp|P01859|IGHG2_HUMAN	176
WVSJKTEGR	5 4 2 0 0	(N(N(H(H(N(H(A))))(H(N(H(A)))))))	sp|P01008|ANT3_HUMAN	224
VYKPSAGJNSLYR	5 4 1 0 0	(N(N(H(H(N(H)))(H(N(H(A)))))))	sp|P02749|APOH_HUMAN	162
LAGKPTHVJVSVVMAEVDGTCY	5 2 0 0 0	(N(N(H(H(H)(H(H))))))	sp|P01876|IGHA1_HUMAN	340
YKJNSDISSTR	6 3 1 0 1	(N(F)(N(H(H(H)(H))(H(N(H(A)))))))	sp|P01871|IGHM_HUMAN	46
AALAAFNAQNJGSNFQLEEISR	5 4 1 0 1	(N(F)(N(H(H(N(H)))(H(N(H(A)))))))	sp|P02765|FETUA_HUMAN	176
PALEDLLLGSEAJLTCTLTGLR	7 2 0 0 0	(N(N(H(H(H))(H(H)(H(H))))))	sp|P01876|IGHA1_HUMAN/sp|P0DOX2|IGA2_HUMAN/sp|P01877|IGHA2_HUMAN	144/246/131
AFNKFSJLTQHK	6 3 2 0 1	(N(N(H(H(H)(H))(H(N(F)(H(A(A))))))))	sp|Q5SXM1|ZN678_HUMAN	251
YKJNSDISSTR	4 3 0 0 1	(N(F)(N(H(H(H))(H(N)))))	sp|P01871|IGHM_HUMAN	46
YKJNSDISSTR	5 4 1 0 1	(N(F)(N(H(H(N(H)))(H(N(H(A)))))))	sp|P01871|IGHM_HUMAN	46
SWPAVGJCSSALR	5 4 1 0 1	(N(F)(N(H(H(N(H)))(H(N(H(A)))))))	sp|P02790|HEMO_HUMAN	187
FJSSYLQGTNQITGR	5 4 1 0 0	(N(N(H(H(N(H)))(H(N(H(A)))))))	sp|P04114|APOB_HUMAN	1523
KFLYJFTQIPHLAGTEQNFQLAK	4 4 1 0 0	(N(N(H(H(N))(H(N(H(A)))))))	sp|Q04609|FOLH1_HUMAN	76
ADTHDEILEGLNFJLTEIPEAQIHEGFQELLR	6 5 2 0 0	(N(N(H(H(N(H(A))))(H(N(H))(N(H(A)))))))	sp|P01009|A1AT_HUMAN	107
TVLTPATNHMGJVTFTIPANR	7 2 0 0 0	(N(N(H(H(H(H)))(H(H(H))))))	sp|P01024|CO3_HUMAN	85
SLGNVJFTVSAEALESQELCGTEVPSVPEHGRK	6 3 1 0 0	(N(N(H(H)(H(H)(H(N(H(A))))))))	sp|P01023|A2MG_HUMAN	869
SLTFJETYQDISELVYGAK	5 4 2 0 0	(N(N(H(H(N(H(A))))(H(N(H(A)))))))	sp|P01008|ANT3_HUMAN	187
NJATVHEQVGGPSLTSDLQAQSK	5 4 2 0 0	(N(N(H(H(N(H(A))))(H(N(H(A)))))))	sp|P04004|VTNC_HUMAN	86
YKJNSDISSTR	6 3 1 0 0	(N(N(H(H)(H(H)(H(N(H(A))))))))	sp|P01871|IGHM_HUMAN	46
QQQHLFGSJVTDCSGJFCLFR	6 4 1 0 1	(N(N(H(H(N(H(H))))(H(N(F)(H(A)))))))	sp|P02787|TRFE_HUMAN	630
PALEDLLLGSEAJLTCTLTGLR	4 4 1 0 0	(N(N(H(H(N))(H(N(H(A)))))))	sp|P01876|IGHA1_HUMAN/sp|P0DOX2|IGA2_HUMAN/sp|P01877|IGHA2_HUMAN	144/246/131
TVLTPATNHMGJVTFTIPANR	5 2 0 0 0	(N(N(H(H)(H(H(H))))))	sp|P01024|CO3_HUMAN	85
YLGJATAIFFLPDEGK	6 4 2 0 0	(N(N(H(H(N(H(A))))(H(N(H(H)(A)))))))	sp|P01009|A1AT_HUMAN	271
FEVDSPVYJATWSASLK	5 4 2 0 0	(N(N(H(H(N(H(A))))(H(N(H(A)))))))	sp|P04114|APOB_HUMAN	3895
QQQHLFGSJVTDCSGJFCLFR	5 4 2 0 1	(N(N(H(H(N(H(A))))(H(N(F)(H(A)))))))	sp|P02787|TRFE_HUMAN	630
EEQFJSTFR	4 4 0 0 1	(N(F)(N(H(H(N(H))(N(H))))))	sp|P01859|IGHG2_HUMAN	176
KAFITJFSMIIDGMTYPGIIK	5 4 2 0 0	(N(N(H(H(N(H(A))))(H(N(H(A)))))))	sp|Q14624|ITIH4_HUMAN	81
HJSTGCLR	5 4 2 0 0	(N(N(H(H(N(H(A))))(H(N(H(A)))))))	sp|P10909|CLUS_HUMAN	291
MVSHHJLTTGATLINEQWLLTTAK	6 5 2 0 0	(N(N(H(H(N(H(A))))(H(N(H))(N(H(A)))))))	sp|P00739|HPTR_HUMAN/sp|P00738|HPT_HUMAN	126/184
LSLHRPALEDLLLGSEAJLTCTLTGLR	4 3 1 0 0	(N(N(H(H)(H(N(H(A)))))))	sp|P01876|IGHA1_HUMAN/sp|P0DOX2|IGA2_HUMAN/sp|P01877|IGHA2_HUMAN	144/246/131
CGLVPVLAENYJK	5 4 2 0 0	(N(N(H(H(N(H(A))))(H(N(H(A)))))))	sp|P02787|TRFE_HUMAN	432
TVLTPATNHMGJVTFTIPANR	4 2 0 0 0	(N(N(H(H(H)(H)))))	sp|P01024|CO3_HUMAN	85
STGKPTLYJVSLVMSDTAGTCY	8 2 0 0 0	(N(N(H(H(H(H(H(H(H(H))))))))))	sp|P0DOX6|IGM_HUMAN/sp|P01871|IGHM_HUMAN	563/440
QLAHQSJSTNIFFSPVSIATAFAMLSLGTK	5 4 2 0 1	(N(F)(N(H(H(N(H(A))))(H(N(H(A)))))))	sp|P01009|A1AT_HUMAN	70
YLGJATAIFFLPDEGK	6 4 1 0 1	(N(N(H(H(N(H(H))))(H(N(F)(H(A)))))))	sp|P01009|A1AT_HUMAN	271
IDSTGJVTNELR	6 2 0 0 0	(N(N(H(H)(H(H)(H(H))))))	sp|O75882|ATRN_HUMAN	416
SLGNVJFTVSAEALESQELCGTEVPSVPEHGR	4 3 1 0 0	(N(N(H(H)(H(N(H(A)))))))	sp|P01023|A2MG_HUMAN	869
STGKPTLYJVSLVMSDTAGTCY	6 2 0 0 0	(N(N(H(H(H))(H(H(H))))))	sp|P0DOX6|IGM_HUMAN/sp|P01871|IGHM_HUMAN	563/440
ALPQPQJVTSLLGCTH	5 4 1 0 0	(N(N(H(H(N(H)))(H(N(H(A)))))))	sp|P02790|HEMO_HUMAN	453
VDKDLQSLEDILHQVEJK	2 3 0 0 0	(N(N(H(H(N)))))	sp|P02679|FIBG_HUMAN	78
LSLHRPALEDLLLGSEAJLTCTLTGLR	5 4 1 0 0	(N(N(H(H(N(H)))(H(N(H(A)))))))	sp|P01876|IGHA1_HUMAN/sp|P0DOX2|IGA2_HUMAN/sp|P01877|IGHA2_HUMAN	144/246/131
STGKPTLYJVSLVMSDTAGTCY	7 2 0 0 0	(N(N(H(H)(H(H(H))(H(H))))))	sp|P0DOX6|IGM_HUMAN/sp|P01871|IGHM_HUMAN	563/440
EEQFJSTFR	2 3 0 0 1	(N(F)(N(H(H(N)))))	sp|P01859|IGHG2_HUMAN	176
YKJNSDISSTR	5 5 0 0 1	(N(F)(N(H(N)(H(N(H)))(H(N(H))))))	sp|P01871|IGHM_HUMAN	46
ELCTISHIFIPAMGJITYDFSFK	6 2 0 0 0	(N(N(H(H(H))(H(H(H))))))	sp|P04114|APOB_HUMAN	3336
ELHHLQEQJVSNAFLDKGEFYIGSK	5 4 2 0 1	(N(F)(N(H(H(N(H(A))))(H(N(H(A)))))))	sp|P00450|CERU_HUMAN	762
QQQHLFGSJVTDCSGJFCLFR	5 4 2 0 1	(N(F)(N(H(H(N(H(A))))(H(N(H(A)))))))	sp|P02787|TRFE_HUMAN	630
TPLTAJITK	5 4 2 0 1	(N(F)(N(H(H(N(H(A))))(H(N(H(A)))))))	sp|P0DOX2|IGA2_HUMAN/sp|P01877|IGHA2_HUMAN	320/205
VDKDLQSLEDILHQVEJK	4 3 0 0 0	(N(N(H(H)(H(N(H))))))	sp|P02679|FIBG_HUMAN	78
JVTAEQAR	5 4 2 0 0	(N(N(H(H(N(H(A))))(H(N(H(A)))))))	sp|P00748|FA12_HUMAN	249
IPCSQPPQIEHGTIJSSR	5 4 2 0 0	(N(N(H(H(N(H(A))))(H(N(H(A)))))))	sp|P08603|CFAH_HUMAN	882
EEQFJSTFR	5 4 1 0 1	(N(F)(N(H(H(N(H)))(H(N(H(A)))))))	sp|P01859|IGHG2_HUMAN	176
EEQYJSTYR	5 4 1 0 1	(N(F)(N(H(H(N(H)))(H(N(H(A)))))))	sp|P0DOX5|IGG1_HUMAN/sp|P01857|IGHG1_HUMAN	299/180
EEQYJSTYR	4 4 1 0 1	(N(F)(N(H(H(N))(H(N(H(A)))))))	sp|P0DOX5|IGG1_HUMAN/sp|P01857|IGHG1_HUMAN	299/180
CSDGWSFDATTLDDJGTMLFFK	5 4 2 0 0	(N(N(H(H(N(H(A))))(H(N(H(A)))))))	sp|P02790|HEMO_HUMAN	64
ALPQPQJVTSLLGCTH	5 4 2 0 0	(N(N(H(H(N(H(A))))(H(N(H(A)))))))	sp|P02790|HEMO_HUMAN	453
SLTFJETYQDISELVYGAK	5 4 1 0 0	(N(N(H(H(N(H)))(H(N(H(A)))))))	sp|P01008|ANT3_HUMAN	187
PALEDLLLGSEAJLTCTLTGLR	4 3 1 0 0	(N(N(H(H)(H(N(H(A)))))))	sp|P01876|IGHA1_HUMAN/sp|P0DOX2|IGA2_HUMAN/sp|P01877|IGHA2_HUMAN	144/246/131
LSLHRPALEDLLLGSEAJLTCTLTGLR	3 4 0 0 0	(N(N(H(H(N))(H(N)))))	sp|P01876|IGHA1_HUMAN/sp|P0DOX2|IGA2_HUMAN/sp|P01877|IGHA2_HUMAN	144/246/131
ELHHLQEQJVSNAFLDKGEFYIGSK	5 4 1 0 1	(N(F)(N(H(H(N(H)))(H(N(H(A)))))))	sp|P00450|CERU_HUMAN	762
QQQHLFGSJVTDCSGJFCLFR	5 4 2 0 0	(N(N(H(H(N(H(A))))(H(N(H(A)))))))	sp|P02787|TRFE_HUMAN	630
QLAHQSJSTNIFFSPVSIATAFAMLSLGTK	5 4 2 0 1	(N(N(H(H(N(H(A))))(H(N(F)(H(A)))))))	sp|P01009|A1AT_HUMAN	70
QVLFLDTVYGJCSTHFTVK	7 2 0 0 0	(N(N(H(H(H)(H))(H(H)(H)))))	sp|P04114|APOB_HUMAN	185
ALYSFAPISMHCJK	5 2 0 0 0	(N(N(H(H(H))(H(H)))))	sp|P09172|DOPO_HUMAN	566
FSDGLESJSSTQFEVK	7 2 0 0 0	(N(N(H(H(H)(H))(H(H)(H)))))	sp|P0C0L4|CO4A_HUMAN/sp|P0C0L5|CO4B_HUMAN	226/226
VDKDLQSLEDILHQVEJK	5 4 1 0 1	(N(F)(N(H(H(N(H)))(H(N(H(A)))))))	sp|P02679|FIBG_HUMAN	78
VDKDLQSLEDILHQVEJK	5 4 1 0 0	(N(N(H(H(N(H)))(H(N(H(A)))))))	sp|P02679|FIBG_HUMAN	78
NEEYJK	6 5 3 0 1	(N(N(H(H(N(F)(H(A))))(H(N(H(A)))(N(H(A)))))))	sp|P02763|A1AG1_HUMAN/sp|P19652|A1AG2_HUMAN	56/56
LSLHRPALEDLLLGSEAJLTCTLTGLR	7 2 0 0 0	(N(N(H(H(H(H)))(H(H(H))))))	sp|P01876|IGHA1_HUMAN/sp|P0DOX2|IGA2_HUMAN/sp|P01877|IGHA2_HUMAN	144/246/131
SWPAVGJCSSALR	6 4 1 0 1	(N(N(H(H(N(H(H))))(H(N(F)(H(A)))))))	sp|P02790|HEMO_HUMAN	187
QLAHQSJSTNIFFSPVSIATAFAMLSLGTK	5 4 2 0 0	(N(N(H(H(N(H(A))))(H(N(H(A)))))))	sp|P01009|A1AT_HUMAN	70
SLGNVJFTVSAEALESQELCGTEVPSVPEHGR	5 2 0 0 0	(N(N(H(H(H(H(H)))))))	sp|P01023|A2MG_HUMAN	869
KLPPGLLAJFTLLR	5 4 2 0 1	(N(F)(N(H(H(N(H(A))))(H(N(H(A)))))))	sp|P02750|A2GL_HUMAN	186
EJISDPTSPLR	5 4 2 0 0	(N(N(H(H(N(H(A))))(H(N(H(A)))))))	sp|P01591|IGJ_HUMAN	71
GHVJITR	5 4 2 0 0	(N(N(H(H(N(H(A))))(H(N(H(A)))))))	sp|P00734|THRB_HUMAN	121
QQQHLFGSJVTDCSGJFCLFR	6 4 1 0 1	(N(N(H(H(H))(H(N(H)(F))(N(H(A)))))))	sp|P02787|TRFE_HUMAN	630
TVLTPATNHMGJVTFTIPANR	6 2 0 0 0	(N(N(H(H(H(H))(H(H))))))	sp|P01024|CO3_HUMAN	85
GLTFQQJASSMCVPDQDTAIR	5 4 1 0 1	(N(F)(N(H(H(N(H)))(H(N(H(A)))))))	sp|P0DOX6|IGM_HUMAN/sp|P01871|IGHM_HUMAN	332/209
JISDGFDGIPDNVDAALALPAHSYSGR	5 4 2 0 1	(N(F)(N(H(H(N(H(A))))(H(N(H(A)))))))	sp|P04004|VTNC_HUMAN	242
STGKPTLYJVSLVMSDTAGTCY	8 2 0 0 0	(N(N(H(H(H))(H(H)(H(H(H)))))))	sp|P0DOX6|IGM_HUMAN/sp|P01871|IGHM_HUMAN	563/440
FSDGLESJSSTQFEVK	10 2 0 0 0	(N(N(H(H(H)(H(H)))(H(H)(H(H(H)))))))	sp|P0C0L4|CO4A_HUMAN/sp|P0C0L5|CO4B_HUMAN	226/226
FSDGLESJSSTQFEVK	9 2 0 0 0	(N(N(H(H(H(H(H))))(H(H(H(H)))))))	sp|P0C0L4|CO4A_HUMAN/sp|P0C0L5|CO4B_HUMAN	226/226
FSDGLESJSSTQFEVKK	9 2 0 0 0	(N(N(H(H)(H(H)(H(H(H(H(H)))))))))	sp|P0C0L4|CO4A_HUMAN/sp|P0C0L5|CO4B_HUMAN	226/226
TVLTPATNHMGJVTFTIPANR	6 2 0 0 0	(N(N(H(H(H))(H(H)(H)))))	sp|P01024|CO3_HUMAN	85
LSLHRPALEDLLLGSEAJLTCTLTGLR	5 3 1 0 0	(N(N(H(H(H))(H(N(H(A)))))))	sp|P01876|IGHA1_HUMAN/sp|P0DOX2|IGA2_HUMAN/sp|P01877|IGHA2_HUMAN	144/246/131
RNPPMGGNVVIFDTVITNQEEPYQJHSGR	5 4 2 0 1	(N(F)(N(H(H(N(H(A))))(H(N(H(A)))))))	sp|P02745|C1QA_HUMAN	146
YLGJATAIFFLPDEGKLQHLENELTHDIITK	5 4 1 0 0	(N(N(H(H(N(H)))(H(N(H(A)))))))	sp|P01009|A1AT_HUMAN	271
EEQYJSTYR	6 4 1 0 0	(N(N(H(H(N(H(H))))(H(N(H(A)))))))	sp|P0DOX5|IGG1_HUMAN/sp|P01857|IGHG1_HUMAN	299/180
TVLTPATNHMGJVTFTIPANR	4 2 0 0 0	(N(N(H(H)(H(H)))))	sp|P01024|CO3_HUMAN	85
EEQYJSTYR	3 4 0 0 1	(N(N(H(H)(N)(H(N(F))))))	sp|P0DOX5|IGG1_HUMAN/sp|P01857|IGHG1_HUMAN	299/180
AALAAFNAQNJGSNFQLEEISR	5 4 2 0 1	(N(F)(N(H(H(N(H(A))))(H(N(H(A)))))))	sp|P02765|FETUA_HUMAN	176
YPHKPEIJSTTHPGADLQEJFCR	5 4 2 0 0	(N(N(H(H(N(H(A))))(H(N(H(A)))))))	sp|P00734|THRB_HUMAN	143
LSLHRPALEDLLLGSEAJLTCTLTGLR	4 4 0 0 0	(N(N(H(H(N))(H(N(H))))))	sp|P01876|IGHA1_HUMAN/sp|P0DOX2|IGA2_HUMAN/sp|P01877|IGHA2_HUMAN	144/246/131
QVETIRNLVDSYMSIIJK	4 3 0 0 0	(N(N(H(H)(H(N(H))))))	sp|Q9UQ16|DYN3_HUMAN	674
QSVPAHFVALJGSK	8 2 0 0 0	(N(N(H(H(H))(H(H)(H(H(H)))))))	sp|P06681|CO2_HUMAN	621
IIVPLNNREJISDPTSPLR	5 3 1 0 1	(N(F)(N(H(H(H))(H(N(H(A)))))))	sp|P01591|IGJ_HUMAN	71
FSDGLESJSSTQFEVKK	9 2 0 0 0	(N(N(H(H(H)(H(H(H(H(H(H))))))))))	sp|P0C0L4|CO4A_HUMAN/sp|P0C0L5|CO4B_HUMAN	226/226
TPLTAJITK	3 3 0 0 1	(N(F)(N(H(H)(H(N)))))	sp|P0DOX2|IGA2_HUMAN/sp|P01877|IGHA2_HUMAN	320/205
IPCSQPPQIEHGTIJSSR	5 4 1 0 0	(N(N(H(H(N(H)))(H(N(H(A)))))))	sp|P08603|CFAH_HUMAN	882
DLQSLEDILHQVEJK	5 4 2 0 0	(N(N(H(H(N(H(A))))(H(N(H(A)))))))	sp|P02679|FIBG_HUMAN	78
JISDGFDGIPDNVDAALALPAHSYSGR	5 4 2 0 0	(N(N(H(H(N(H(A))))(H(N(H(A)))))))	sp|P04004|VTNC_HUMAN	242
EEQFJSTFR	4 5 0 0 0	(N(N(H(N)(H(N))(H(N(H))))))	sp|P01859|IGHG2_HUMAN	176
EEQFJSTFR	5 4 0 0 0	(N(N(H(H(H))(H(N)(N(H))))))	sp|P01859|IGHG2_HUMAN	176
SSVITLNTNAELFJQSDIVAHLLSSSSSVIDALQYK	9 2 0 0 0	(N(N(H(H(H))(H(H(H))(H(H(H)))))))	sp|P04114|APOB_HUMAN	3358
EEQFJSTFR	2 3 0 0 1	(N(F)(N(H(H)(N))))	sp|P01859|IGHG2_HUMAN	176
EEQYJSTYR	5 4 0 0 1	(N(F)(N(H(H(N(H)))(H(N(H))))))	sp|P0DOX5|IGG1_HUMAN/sp|P01857|IGHG1_HUMAN	299/180
EEQFJSTFR	3 3 0 0 1	(N(F)(N(H(N)(H(H)))))	sp|P01859|IGHG2_HUMAN	176
EEQFJSTYR	4 4 1 0 1	(N(F)(N(H(H(N))(H(N(H(A)))))))	sp|P01861|IGHG4_HUMAN	177
GTAGNALMDGASQLMGEJR	4 4 1 0 0	(N(N(H(H(N))(H(N(H(A)))))))	sp|P02675|FIBB_HUMAN	394
LSLHRPALEDLLLGSEAJLTCTLTGLR	8 2 0 0 0	(N(N(H(H(H)(H))(H(H)(H(H))))))	sp|P01876|IGHA1_HUMAN/sp|P0DOX2|IGA2_HUMAN/sp|P01877|IGHA2_HUMAN	144/246/131
SLGNVJFTVSAEALESQELCGTEVPSVPEHGRK	6 2 0 0 0	(N(N(H(H)(H(H(H(H)))))))	sp|P01023|A2MG_HUMAN	869
PALEDLLLGSEAJLTCTLTGLR	8 2 0 0 0	(N(N(H(H(H))(H(H)(H(H(H)))))))	sp|P01876|IGHA1_HUMAN/sp|P0DOX2|IGA2_HUMAN/sp|P01877|IGHA2_HUMAN	144/246/131
TVLTPATNHMGJVTFTIPANR	5 2 0 0 0	(N(N(H(H(H)(H(H))))))	sp|P01024|CO3_HUMAN	85
TVLTPATNHMGJVTFTIPANR	7 2 0 0 0	(N(N(H(H)(H(H(H(H(H))))))))	sp|P01024|CO3_HUMAN	85
SLGNVJFTVSAEALESQELCGTEVPSVPEHGRK	4 4 1 0 0	(N(N(H(H(N))(H(N(H(A)))))))	sp|P01023|A2MG_HUMAN	869
YLGJATAIFFLPDEGKLQHLENELTHDIITK	5 4 2 0 0	(N(N(H(H(N(H(A))))(H(N(H(A)))))))	sp|P01009|A1AT_HUMAN	271
NEEYJK	7 5 2 0 1	(N(N(H(N)(H(H)(H))(H(N(H(A)))(N(F)(H(A)))))))	sp|P02763|A1AG1_HUMAN/sp|P19652|A1AG2_HUMAN	56/56
FSDGLESJSSTQFEVK	9 2 0 0 0	(N(N(H(H(H(H)))(H(H(H))(H(H))))))	sp|P0C0L4|CO4A_HUMAN/sp|P0C0L5|CO4B_HUMAN	226/226
STGKPTLYJVSLVMSDTAGTCY	8 2 0 0 0	(N(N(H(H(H(H)))(H(H(H(H)))))))	sp|P0DOX6|IGM_HUMAN/sp|P01871|IGHM_HUMAN	563/440
SLGNVJFTVSAEALESQELCGTEVPSVPEHGR	5 2 0 0 0	(N(N(H(H)(H(H(H))))))	sp|P01023|A2MG_HUMAN	869
INNDFNYEFYJSTWSYVK	5 2 0 0 0	(N(N(H(H(H(H(H)))))))	sp|P10643|CO7_HUMAN	202
STGKPTLYJVSLVMSDTAGTCY	9 2 0 0 0	(N(N(H(H(H(H))(H(H(H(H(H)))))))))	sp|P0DOX6|IGM_HUMAN/sp|P01871|IGHM_HUMAN	563/440
LSLHRPALEDLLLGSEAJLTCTLTGLR	3 3 0 0 0	(N(N(H(H)(H(N)))))	sp|P01876|IGHA1_HUMAN/sp|P0DOX2|IGA2_HUMAN/sp|P01877|IGHA2_HUMAN	144/246/131
FSDGLESJSSTQFEVK	9 2 0 0 0	(N(N(H(H(H))(H(H)(H(H(H(H))))))))	sp|P0C0L4|CO4A_HUMAN/sp|P0C0L5|CO4B_HUMAN	226/226
EEQFJSTYR	4 5 0 0 1	(N(F)(N(H(N)(H(N))(H(N(H))))))	sp|P01861|IGHG4_HUMAN	177
FSDGLESJSSTQFEVK	8 2 0 0 0	(N(N(H(H(H(H)))(H(H)(H)(H)))))	sp|P0C0L4|CO4A_HUMAN/sp|P0C0L5|CO4B_HUMAN	226/226
FSDGLESJSSTQFEVK	9 2 0 0 0	(N(N(H(H(H)(H(H)))(H(H(H(H)))))))	sp|P0C0L4|CO4A_HUMAN/sp|P0C0L5|CO4B_HUMAN	226/226
MVSHHJLTTGATLINEQWLLTTAK	5 4 0 0 0	(N(N(H(H(N(H)))(H(N(H))))))	sp|P00739|HPTR_HUMAN/sp|P00738|HPT_HUMAN	126/184
PALEDLLLGSEAJLTCTLTGLR	6 2 0 0 0	(N(N(H(H(H))(H(H)(H)))))	sp|P01876|IGHA1_HUMAN/sp|P0DOX2|IGA2_HUMAN/sp|P01877|IGHA2_HUMAN	144/246/131
DIVEYYJDSJGSHVLQGR	5 4 2 0 1	(N(F)(N(H(H(N(H(A))))(H(N(H(A)))))))	sp|P25311|ZA2G_HUMAN	109
STGKPTLYJVSLVMSDTAGTCY	7 2 0 0 0	(N(N(H(H(H)(H))(H(H)(H)))))	sp|P0DOX6|IGM_HUMAN/sp|P01871|IGHM_HUMAN	563/440
YKJNSDISSTR	4 4 0 0 1	(N(F)(N(H(H)(N)(H(N(H))))))	sp|P01871|IGHM_HUMAN	46
YKJNSDISSTR	5 4 0 0 1	(N(F)(N(H(H(N))(H(N(H(H)))))))	sp|P01871|IGHM_HUMAN	46
LSLHRPALEDLLLGSEAJLTCTLTGLR	9 2 0 0 0	(N(N(H(H(H(H)))(H(H(H(H(H))))))))	sp|P01876|IGHA1_HUMAN/sp|P0DOX2|IGA2_HUMAN/sp|P01877|IGHA2_HUMAN	144/246/131
FSDGLESJSSTQFEVK	10 2 0 0 0	(N(N(H(H(H(H)))(H(H(H))(H(H)(H))))))	sp|P0C0L4|CO4A_HUMAN/sp|P0C0L5|CO4B_HUMAN	226/226
SLGNVJFTVSAEALESQELCGTEVPSVPEHGRK	6 3 0 0 0	(N(N(H(H(H(H)))(H(N(H))))))	sp|P01023|A2MG_HUMAN	869
STGKPTLYJVSLVMSDTAGTCY	9 2 0 0 0	(N(N(H(H(H)(H(H)))(H(H(H(H)))))))	sp|P0DOX6|IGM_HUMAN/sp|P01871|IGHM_HUMAN	563/440
JISDGFDGIPDNVDAALALPAHSYSGR	6 5 3 0 1	(N(N(H(H(N(F)(H(A))))(H(N(H(A)))(N(H(A)))))))	sp|P04004|VTNC_HUMAN	242
FJSSYLQGTNQITGR	4 3 1 0 0	(N(N(H(H)(H(N(H(A)))))))	sp|P04114|APOB_HUMAN	1523
PALEDLLLGSEAJLTCTLTGLR	5 2 0 0 0	(N(N(H(H(H)(H(H))))))	sp|P01876|IGHA1_HUMAN/sp|P0DOX2|IGA2_HUMAN/sp|P01877|IGHA2_HUMAN	144/246/131
QVLFLDTVYGJCSTHFTVK	8 2 0 0 0	(N(N(H(H(H(H(H)))(H(H(H)))))))	sp|P04114|APOB_HUMAN	185
VSJQTLSLFFTVLQDVPVR	5 4 1 0 1	(N(F)(N(H(H(N(H)))(H(N(H(A)))))))	sp|P01023|A2MG_HUMAN	1424
SLGNVJFTVSAEALESQELCGTEVPSVPEHGR	6 2 0 0 0	(N(N(H(H)(H(H)(H(H))))))	sp|P01023|A2MG_HUMAN	869
FJSSYLQGTNQITGR	5 2 0 0 0	(N(N(H(H)(H(H)(H)))))	sp|P04114|APOB_HUMAN	1523
LSLHRPALEDLLLGSEAJLTCTLTGLR	5 5 2 0 0	(N(N(H(N)(H(N(H(A))))(H(N(H(A)))))))	sp|P01876|IGHA1_HUMAN/sp|P0DOX2|IGA2_HUMAN/sp|P01877|IGHA2_HUMAN	144/246/131
FSDGLESJSSTQFEVK	10 2 0 0 0	(N(N(H(H(H(H)))(H(H)(H(H)(H(H)))))))	sp|P0C0L4|CO4A_HUMAN/sp|P0C0L5|CO4B_HUMAN	226/226
YLGJATAIFFLPDEGK	6 4 0 0 1	(N(N(H(H(H))(H(N(H))(N(H)(F))))))	sp|P01009|A1AT_HUMAN	271
SSVITLNTNAELFJQSDIVAHLLSSSSSVIDALQYK	9 2 0 0 0	(N(N(H(H(H)(H(H)))(H(H(H(H)))))))	sp|P04114|APOB_HUMAN	3358
ADTHDEILEGLNFJLTEIPEAQIHEGFQELLR	6 5 3 0 0	(N(N(H(H(N(H(A))))(H(N(H(A)))(N(H(A)))))))	sp|P01009|A1AT_HUMAN	107
STGKPTLYJVSLVMSDTAGTCY	7 2 0 0 0	(N(N(H(H)(H(H(H(H(H))))))))	sp|P0DOX6|IGM_HUMAN/sp|P01871|IGHM_HUMAN	563/440
LAGKPTHVJVSVVMAEVDGTCY	5 2 0 0 0	(N(N(H(H)(H(H)(H)))))	sp|P01876|IGHA1_HUMAN	340
FSDGLESJSSTQFEVK	7 2 0 0 0	(N(N(H(H(H(H)))(H(H(H))))))	sp|P0C0L4|CO4A_HUMAN/sp|P0C0L5|CO4B_HUMAN	226/226
LSLHRPALEDLLLGSEAJLTCTLTGLR	5 4 0 0 0	(N(N(H(H(H))(H(N)(N(H))))))	sp|P01876|IGHA1_HUMAN/sp|P0DOX2|IGA2_HUMAN/sp|P01877|IGHA2_HUMAN	144/246/131
LSLHRPALEDLLLGSEAJLTCTLTGLR	6 3 0 0 0	(N(N(H(H(H)(H))(H(H(N))))))	sp|P01876|IGHA1_HUMAN/sp|P0DOX2|IGA2_HUMAN/sp|P01877|IGHA2_HUMAN	144/246/131
LSLHRPALEDLLLGSEAJLTCTLTGLR	4 5 0 0 0	(N(N(H(N)(H(N))(H(N(H))))))	sp|P01876|IGHA1_HUMAN/sp|P0DOX2|IGA2_HUMAN/sp|P01877|IGHA2_HUMAN	144/246/131
LAGKPTHVJVSVVMAEVDGTCY	8 2 0 0 0	(N(N(H(H(H(H(H(H(H(H))))))))))	sp|P01876|IGHA1_HUMAN	340
VVLHPJYSQVDIGLIK	6 5 3 0 1	(N(N(H(H(N(F)(H(A))))(H(N(H(A)))(N(H(A)))))))	sp|P00738|HPT_HUMAN	241
TVLTPATNHMGJVTFTIPANR	7 2 0 0 0	(N(N(H(H(H))(H(H)(H(H))))))	sp|P01024|CO3_HUMAN	85
IDSTGJVTNELR	6 2 0 0 0	(N(N(H(H)(H(H)(H)(H)))))	sp|O75882|ATRN_HUMAN	416
TVLTPATNHMGJVTFTIPANR	7 2 0 0 0	(N(N(H(H(H(H))(H(H(H)))))))	sp|P01024|CO3_HUMAN	85
SLGNVJFTVSAEALESQELCGTEVPSVPEHGR	6 3 1 0 0	(N(N(H(H(H)(H))(H(N(H(A)))))))	sp|P01023|A2MG_HUMAN	869
LSLHRPALEDLLLGSEAJLTCTLTGLR	4 5 1 0 0	(N(N(H(N)(H(N))(H(N(H(A)))))))	sp|P01876|IGHA1_HUMAN/sp|P0DOX2|IGA2_HUMAN/sp|P01877|IGHA2_HUMAN	144/246/131
LSLHRPALEDLLLGSEAJLTCTLTGLR	4 5 0 0 1	(N(F)(N(H(N)(H(N(H))(N(H))))))	sp|P01876|IGHA1_HUMAN/sp|P0DOX2|IGA2_HUMAN/sp|P01877|IGHA2_HUMAN	144/246/131
LSLHRPALEDLLLGSEAJLTCTLTGLR	6 2 0 0 0	(N(N(H(H(H)(H(H(H)))))))	sp|P01876|IGHA1_HUMAN/sp|P0DOX2|IGA2_HUMAN/sp|P01877|IGHA2_HUMAN	144/246/131
SLGNVJFTVSAEALESQELCGTEVPSVPEHGR	6 2 0 0 0	(N(N(H(H(H))(H(H)(H)))))	sp|P01023|A2MG_HUMAN	869
STGKPTLYJVSLVMSDTAGTCY	8 2 0 0 0	(N(N(H(H(H))(H(H(H(H(H))))))))	sp|P0DOX6|IGM_HUMAN/sp|P01871|IGHM_HUMAN	563/440
SWPAVGJCSSALR	6 4 2 0 0	(N(N(H(H(N(H(A))))(H(N(H(H)(A)))))))	sp|P02790|HEMO_HUMAN	187
STGKPTLYJVSLVMSDTAGTCY	6 2 0 0 0	(N(N(H(H)(H(H(H(H)))))))	sp|P0DOX6|IGM_HUMAN/sp|P01871|IGHM_HUMAN	563/440
PALEDLLLGSEAJLTCTLTGLR	5 2 0 0 0	(N(N(H(H)(H(H(H))))))	sp|P01876|IGHA1_HUMAN/sp|P0DOX2|IGA2_HUMAN/sp|P01877|IGHA2_HUMAN	144/246/131
GLTFQQJASSMCVPDQDTAIR	5 5 1 0 1	(N(F)(N(H(H(N(H)))(H(N)(N(H(A)))))))	sp|P0DOX6|IGM_HUMAN/sp|P01871|IGHM_HUMAN	332/209
LSLHRPALEDLLLGSEAJLTCTLTGLR	6 2 0 0 0	(N(N(H(H)(H(H(H(H)))))))	sp|P01876|IGHA1_HUMAN/sp|P0DOX2|IGA2_HUMAN/sp|P01877|IGHA2_HUMAN	144/246/131
STGKPTLYJVSLVMSDTAGTCY	8 2 0 0 0	(N(N(H(H(H))(H(H(H))(H(H))))))	sp|P0DOX6|IGM_HUMAN/sp|P01871|IGHM_HUMAN	563/440
LSLHRPALEDLLLGSEAJLTCTLTGLR	7 2 0 0 0	(N(N(H(H(H(H))(H(H(H)))))))	sp|P01876|IGHA1_HUMAN/sp|P0DOX2|IGA2_HUMAN/sp|P01877|IGHA2_HUMAN	144/246/131
TVLTPATNHMGJVTFTIPANR	7 2 0 0 0	(N(N(H(H(H)(H(H(H(H))))))))	sp|P01024|CO3_HUMAN	85
LSLHRPALEDLLLGSEAJLTCTLTGLR	6 3 1 0 0	(N(N(H(H)(H(H)(H(N(H(A))))))))	sp|P01876|IGHA1_HUMAN/sp|P0DOX2|IGA2_HUMAN/sp|P01877|IGHA2_HUMAN	144/246/131
TPLTAJITK	5 5 1 0 1	(N(F)(N(H(N)(H(N(H)))(H(N(H(A)))))))	sp|P0DOX2|IGA2_HUMAN/sp|P01877|IGHA2_HUMAN	320/205
QVLFLDTVYGJCSTHFTVK	5 2 0 0 0	(N(N(H(H)(H(H)(H)))))	sp|P04114|APOB_HUMAN	185
LAGKPTHVJVSVVMAEVDGTCY	6 2 0 0 0	(N(N(H(H)(H(H)(H)(H)))))	sp|P01876|IGHA1_HUMAN	340
FSDGLESJSSTQFEVK	7 2 0 0 0	(N(N(H(H(H(H))(H(H(H)))))))	sp|P0C0L4|CO4A_HUMAN/sp|P0C0L5|CO4B_HUMAN	226/226
FSDGLESJSSTQFEVK	9 2 0 0 0	(N(N(H(H(H(H))(H(H(H(H(H)))))))))	sp|P0C0L4|CO4A_HUMAN/sp|P0C0L5|CO4B_HUMAN	226/226
FJLTETSEAEIHQSFQHLLR	5 4 2 0 0	(N(N(H(H(N(H(A))))(H(N(H(A)))))))	sp|P01011|AACT_HUMAN	106
AALAAFNAQNJGSNFQLEEISR	5 4 2 0 0	(N(N(H(H(N(H(A))))(H(N(H(A)))))))	sp|P02765|FETUA_HUMAN	176
LSLHRPALEDLLLGSEAJLTCTLTGLR	4 5 1 0 0	(N(N(H(H(N)(N))(H(N(H(A)))))))	sp|P01876|IGHA1_HUMAN/sp|P0DOX2|IGA2_HUMAN/sp|P01877|IGHA2_HUMAN	144/246/131
RNPPMGGNVVIFDTVITNQEEPYQJHSGR	5 4 1 0 1	(N(F)(N(H(H(N(H)))(H(N(H(A)))))))	sp|P02745|C1QA_HUMAN	146
FSDGLESJSSTQFEVK	9 2 0 0 0	(N(N(H(H(H(H)))(H(H(H(H(H))))))))	sp|P0C0L4|CO4A_HUMAN/sp|P0C0L5|CO4B_HUMAN	226/226
LSLHRPALEDLLLGSEAJLTCTLTGLR	7 2 0 0 0	(N(N(H(H(H)(H(H(H(H))))))))	sp|P01876|IGHA1_HUMAN/sp|P0DOX2|IGA2_HUMAN/sp|P01877|IGHA2_HUMAN	144/246/131
LSLHRPALEDLLLGSEAJLTCTLTGLR	5 4 1 0 1	(N(N(H(H(N(H)(F)))(H(N(H(A)))))))	sp|P01876|IGHA1_HUMAN/sp|P0DOX2|IGA2_HUMAN/sp|P01877|IGHA2_HUMAN	144/246/131
SLGNVJFTVSAEALESQELCGTEVPSVPEHGR	4 4 1 0 0	(N(N(H(H(N))(H(N(H(A)))))))	sp|P01023|A2MG_HUMAN	869
QVLFLDTVYGJCSTHFTVK	7 2 0 0 0	(N(N(H(H(H))(H(H)(H)(H)))))	sp|P04114|APOB_HUMAN	185
AGLQAFFQVQECJK	5 4 2 0 0	(N(N(H(H(N(H(A))))(H(N(H(A)))))))	sp|P00450|CERU_HUMAN	358
LSLHRPALEDLLLGSEAJLTCTLTGLR	8 2 0 0 0	(N(N(H(H(H(H(H(H(H(H))))))))))	sp|P01876|IGHA1_HUMAN/sp|P0DOX2|IGA2_HUMAN/sp|P01877|IGHA2_HUMAN	144/246/131
SLGNVJFTVSAEALESQELCGTEVPSVPEHGR	6 3 0 0 0	(N(N(H(H(H)(H))(H(H(N))))))	sp|P01023|A2MG_HUMAN	869
LSLHRPALEDLLLGSEAJLTCTLTGLR	9 2 0 0 0	(N(N(H(H(H))(H(H)(H(H(H(H))))))))	sp|P01876|IGHA1_HUMAN/sp|P0DOX2|IGA2_HUMAN/sp|P01877|IGHA2_HUMAN	144/246/131
ALPQPQJVTSLLGCTH	6 4 1 0 1	(N(N(H(H(N(H(H))))(H(N(F)(H(A)))))))	sp|P02790|HEMO_HUMAN	453
JGTLVAFR	5 2 0 0 0	(N(N(H(H)(H(H(H))))))	sp|Q92954|PRG4_HUMAN	1159
TVLTPATNHMGJVTFTIPANR	6 3 1 0 0	(N(N(H(H)(H(H)(H(N(H(A))))))))	sp|P01024|CO3_HUMAN	85
VDKDLQSLEDILHQVEJK	4 3 1 0 0	(N(N(H(H)(H(N(H(A)))))))	sp|P02679|FIBG_HUMAN	78
VDKDLQSLEDILHQVEJK	2 3 0 0 0	(N(N(H(H)(N))))	sp|P02679|FIBG_HUMAN	78
LAJLTQGEDQYYLR	5 4 2 0 0	(N(N(H(H(N(H(A))))(H(N(H(A)))))))	sp|P10909|CLUS_HUMAN	374
SLGNVJFTVSAEALESQELCGTEVPSVPEHGRK	6 2 0 0 0	(N(N(H(H)(H(H)(H(H))))))	sp|P01023|A2MG_HUMAN	869
EEQFJSTFR	5 2 0 0 0	(N(N(H(H)(H(H(H))))))	sp|P01859|IGHG2_HUMAN	176
LAGKPTHVJVSVVMAEVDGTCY	5 4 2 0 1	(N(F)(N(H(H(N(H(A))))(H(N(H(A)))))))	sp|P01876|IGHA1_HUMAN	340
ADTHDEILEGLNFJLTEIPEAQIHEGFQELLR	5 4 2 0 0	(N(N(H(H(N(H(A))))(H(N(H(A)))))))	sp|P01009|A1AT_HUMAN	107
LAGKPTHVJVSVVMAEVDGTCY	7 2 0 0 0	(N(N(H(H(H)(H(H(H(H))))))))	sp|P01876|IGHA1_HUMAN	340
YKJNSDISSTR	6 2 0 0 0	(N(N(H(H)(H(H)(H(H))))))	sp|P01871|IGHM_HUMAN	46
LAGKPTHVJVSVVMAEVDGTCY	6 2 0 0 0	(N(N(H(H(H))(H(H(H))))))	sp|P01876|IGHA1_HUMAN	340
FJSSYLQGTNQITGR	5 2 0 0 0	(N(N(H(H)(H(H(H))))))	sp|P04114|APOB_HUMAN	1523
TPLTAJITK	5 5 0 0 1	(N(F)(N(H(N)(H(N(H)))(H(N(H))))))	sp|P0DOX2|IGA2_HUMAN/sp|P01877|IGHA2_HUMAN	320/205
FSDGLESJSSTQFEVK	8 2 0 0 0	(N(N(H(H(H(H(H(H(H(H))))))))))	sp|P0C0L4|CO4A_HUMAN/sp|P0C0L5|CO4B_HUMAN	226/226
STGKPTLYJVSLVMSDTAGTCY	6 2 0 0 0	(N(N(H(H)(H(H)(H)(H)))))	sp|P0DOX6|IGM_HUMAN/sp|P01871|IGHM_HUMAN	563/440
YKJNSDISSTR	4 3 0 0 1	(N(F)(N(H(H)(H(N(H))))))	sp|P01871|IGHM_HUMAN	46
EJLTAPGSDSAVFFEQGTTR	5 4 2 0 0	(N(N(H(H(N(H(A))))(H(N(H(A)))))))	sp|P00450|CERU_HUMAN	397
LAGKPTHVJVSVVMAEVDGTCY	7 2 0 0 0	(N(N(H(H(H))(H(H)(H)(H)))))	sp|P01876|IGHA1_HUMAN	340
LSLHRPALEDLLLGSEAJLTCTLTGLR	3 5 0 0 0	(N(N(H(N)(H(N))(H(N)))))	sp|P01876|IGHA1_HUMAN/sp|P0DOX2|IGA2_HUMAN/sp|P01877|IGHA2_HUMAN	144/246/131
STGKPTLYJVSLVMSDTAGTCY	7 2 0 0 0	(N(N(H(H(H)(H(H(H(H))))))))	sp|P0DOX6|IGM_HUMAN/sp|P01871|IGHM_HUMAN	563/440
LSLHRPALEDLLLGSEAJLTCTLTGLR	6 2 0 0 0	(N(N(H(H(H(H))(H(H))))))	sp|P01876|IGHA1_HUMAN/sp|P0DOX2|IGA2_HUMAN/sp|P01877|IGHA2_HUMAN	144/246/131
GTAGNALMDGASQLMGEJR	5 4 2 0 0	(N(N(H(H(N(H(A))))(H(N(H(A)))))))	sp|P02675|FIBB_HUMAN	394
STGKPTLYJVSLVMSDTAGTCY	8 2 0 0 0	(N(N(H(H(H))(H(H)(H)(H(H))))))	sp|P0DOX6|IGM_HUMAN/sp|P01871|IGHM_HUMAN	563/440
DIVEYYJDSJGSHVLQGR	5 4 2 0 0	(N(N(H(H(N(H(A))))(H(N(H(A)))))))	sp|P25311|ZA2G_HUMAN	112
TVLTPATNHMGJVTFTIPANR	7 2 0 0 0	(N(N(H(H(H)(H))(H(H(H))))))	sp|P01024|CO3_HUMAN	85
LAGKPTHVJVSVVMAEVDGTCY	6 2 0 0 0	(N(N(H(H(H(H))(H(H))))))	sp|P01876|IGHA1_HUMAN	340
FVEGSHJSTVSLTTK	5 2 0 0 0	(N(N(H(H)(H(H(H))))))	sp|P04114|APOB_HUMAN	3411
ELHHLQEQJVSNAFLDKGEFYIGSK	5 4 2 0 0	(N(N(H(H(N(H(A))))(H(N(H(A)))))))	sp|P00450|CERU_HUMAN	762
EEQFJSTFR	6 2 0 0 0	(N(N(H(H(H))(H(H(H))))))	sp|P01859|IGHG2_HUMAN	176
QVLFLDTVYGJCSTHFTVK	5 2 0 0 0	(N(N(H(H)(H(H(H))))))	sp|P04114|APOB_HUMAN	185
YKJNSDISSTR	4 3 1 0 0	(N(N(H(H)(H(N(H(A)))))))	sp|P01871|IGHM_HUMAN	46
TVLTPATNHMGJVTFTIPANR	7 2 0 0 0	(N(N(H(H(H))(H(H(H(H)))))))	sp|P01024|CO3_HUMAN	85
FSDGLESJSSTQFEVK	9 2 0 0 0	(N(N(H(H(H)(H))(H(H(H(H(H))))))))	sp|P0C0L4|CO4A_HUMAN/sp|P0C0L5|CO4B_HUMAN	226/226
VCQDCPLLAPLJDTR	5 4 2 0 0	(N(N(H(H(N(H(A))))(H(N(H(A)))))))	sp|P02765|FETUA_HUMAN	156
DIVEYYJDSJGSHVLQGR	5 4 2 0 1	(N(F)(N(H(H(N(H(A))))(H(N(H(A)))))))	sp|P25311|ZA2G_HUMAN	112
LAGKPTHVJVSVVMAEVDGTCY	8 2 0 0 0	(N(N(H(H)(H(H(H))(H(H(H)))))))	sp|P01876|IGHA1_HUMAN	340
VDKDLQSLEDILHQVEJK	4 4 0 0 0	(N(N(H(H(N))(H(N(H))))))	sp|P02679|FIBG_HUMAN	78
SWPAVGJCSSALR	5 4 2 0 1	(N(F)(N(H(H(N(H(A))))(H(N(H(A)))))))	sp|P02790|HEMO_HUMAN	187
QVLFLDTVYGJCSTHFTVK	9 2 0 0 0	(N(N(H(H(H)(H(H)))(H(H)(H(H))))))	sp|P04114|APOB_HUMAN	185
VFHIHJESWVLLTPK	5 2 0 0 0	(N(N(H(H)(H(H)(H)))))	sp|O75882|ATRN_HUMAN	428
JNSDISSTR	5 4 1 0 1	(N(F)(N(H(H(N(H)))(H(N(H(A)))))))	sp|P01871|IGHM_HUMAN	46
ESVTDHVNLITPLEKPLQJFTLCFR	5 4 2 0 0	(N(N(H(H(N(H(A))))(H(N(H(A)))))))	sp|P02743|SAMP_HUMAN	51
FSDGLESJSSTQFEVK	9 2 0 0 0	(N(N(H(H(H))(H(H(H))(H(H(H)))))))	sp|P0C0L4|CO4A_HUMAN/sp|P0C0L5|CO4B_HUMAN	226/226
QSVPAHFVALJGSK	5 2 0 0 0	(N(N(H(H)(H(H(H))))))	sp|P06681|CO2_HUMAN	621
QVLFLDTVYGJCSTHFTVK	8 2 0 0 0	(N(N(H(H(H(H)))(H(H(H(H)))))))	sp|P04114|APOB_HUMAN	185
VFHIHJESWVLLTPK	5 2 0 0 0	(N(N(H(H)(H(H(H))))))	sp|O75882|ATRN_HUMAN	428
STGKPTLYJVSLVMSDTAGTCY	8 2 0 0 0	(N(N(H(H(H(H)))(H(H)(H)(H)))))	sp|P0DOX6|IGM_HUMAN/sp|P01871|IGHM_HUMAN	563/440
VDKDLQSLEDILHQVEJK	5 4 0 0 0	(N(N(H(H(N))(H(H)(H)(N)))))	sp|P02679|FIBG_HUMAN	78
LAGKPTHVJVSVVMAEVDGTCY	7 2 0 0 0	(N(N(H(H(H(H)))(H(H(H))))))	sp|P01876|IGHA1_HUMAN	340
LISJCSK	5 4 2 0 0	(N(N(H(H(N(H(A))))(H(N(H(A)))))))	sp|P05156|CFAI_HUMAN	494
QSVPAHFVALJGSK	6 2 0 0 0	(N(N(H(H(H))(H(H(H))))))	sp|P06681|CO2_HUMAN	621
QVLFLDTVYGJCSTHFTVK	7 2 0 0 0	(N(N(H(H(H))(H(H)(H(H))))))	sp|P04114|APOB_HUMAN	185
JGSLFAFR	6 3 1 0 0	(N(N(H(H)(H(H)(H(N(H(A))))))))	sp|P04004|VTNC_HUMAN	169
FVEGSHJSTVSLTTK	5 2 0 0 0	(N(N(H(H)(H(H)(H)))))	sp|P04114|APOB_HUMAN	3411
FJSSYLQGTNQITGR	4 4 1 0 0	(N(N(H(H(N))(H(N(H(A)))))))	sp|P04114|APOB_HUMAN	1523
YKJNSDISSTR	6 2 0 0 0	(N(N(H(H)(H(H)(H)(H)))))	sp|P01871|IGHM_HUMAN	46
FSDGLESJSSTQFEVK	9 2 0 0 0	(N(N(H(H)(H(H(H(H)))(H(H(H)))))))	sp|P0C0L4|CO4A_HUMAN/sp|P0C0L5|CO4B_HUMAN	226/226
VDKDLQSLEDILHQVEJK	3 3 0 0 0	(N(N(H(H)(H)(N))))	sp|P02679|FIBG_HUMAN	78
QSVPAHFVALJGSK	5 2 0 0 0	(N(N(H(H)(H(H)(H)))))	sp|P06681|CO2_HUMAN	621
TVLTPATNHMGJVTFTIPANR	6 2 0 0 0	(N(N(H(H(H(H(H(H))))))))	sp|P01024|CO3_HUMAN	85
DLQSLEDILHQVEJK	5 4 1 0 0	(N(N(H(H(N(H)))(H(N(H(A)))))))	sp|P02679|FIBG_HUMAN	78
CGLVPVLAENYJK	5 4 1 0 0	(N(N(H(H(N(H)))(H(N(H(A)))))))	sp|P02787|TRFE_HUMAN	432
TVLTPATNHMGJVTFTIPANR	7 2 0 0 0	(N(N(H(H)(H(H)(H(H(H)))))))	sp|P01024|CO3_HUMAN	85
LSLHRPALEDLLLGSEAJLTCTLTGLR	5 4 0 0 0	(N(N(H(H(N))(H(H)(H)(N)))))	sp|P01876|IGHA1_HUMAN/sp|P0DOX2|IGA2_HUMAN/sp|P01877|IGHA2_HUMAN	144/246/131
TPLTAJITK	4 5 0 0 1	(N(F)(N(H(N)(H(N))(H(N(H))))))	sp|P0DOX2|IGA2_HUMAN/sp|P01877|IGHA2_HUMAN	320/205
QSVPAHFVALJGSK	6 2 0 0 0	(N(N(H(H)(H(H(H(H)))))))	sp|P06681|CO2_HUMAN	621
FSDGLESJSSTQFEVK	9 2 0 0 0	(N(N(H(H(H(H)))(H(H)(H(H(H)))))))	sp|P0C0L4|CO4A_HUMAN/sp|P0C0L5|CO4B_HUMAN	226/226
FSDGLESJSSTQFEVK	10 2 0 0 0	(N(N(H(H(H(H(H))))(H(H(H))(H(H))))))	sp|P0C0L4|CO4A_HUMAN/sp|P0C0L5|CO4B_HUMAN	226/226
FSDGLESJSSTQFEVK	9 2 0 0 0	(N(N(H(H(H(H(H)))(H(H(H(H))))))))	sp|P0C0L4|CO4A_HUMAN/sp|P0C0L5|CO4B_HUMAN	226/226
STGKPTLYJVSLVMSDTAGTCY	8 2 0 0 0	(N(N(H(H)(H(H)(H(H(H(H))))))))	sp|P0DOX6|IGM_HUMAN/sp|P01871|IGHM_HUMAN	563/440
SWPAVGJCSSALR	6 4 1 0 2	(N(F)(N(H(H(N(H(H))))(H(N(F)(H(A)))))))	sp|P02790|HEMO_HUMAN	187
STGKPTLYJVSLVMSDTAGTCY	8 2 0 0 0	(N(N(H(H(H(H)))(H(H)(H(H))))))	sp|P0DOX6|IGM_HUMAN/sp|P01871|IGHM_HUMAN	563/440
LSLHRPALEDLLLGSEAJLTCTLTGLR	4 5 1 0 0	(N(N(H(N)(H(N(H))(N(H(A)))))))	sp|P01876|IGHA1_HUMAN/sp|P0DOX2|IGA2_HUMAN/sp|P01877|IGHA2_HUMAN	144/246/131
DTFVJASR	5 4 2 0 0	(N(N(H(H(N(H(A))))(H(N(H(A)))))))	sp|P05155|IC1_HUMAN	238
QSVPAHFVALJGSK	7 2 0 0 0	(N(N(H(H(H(H)))(H(H(H))))))	sp|P06681|CO2_HUMAN	621
STGKPTLYJVSLVMSDTAGTCY	8 2 0 0 0	(N(N(H(H(H(H))(H(H(H(H))))))))	sp|P0DOX6|IGM_HUMAN/sp|P01871|IGHM_HUMAN	563/440
FSDGLESJSSTQFEVK	8 2 0 0 0	(N(N(H(H(H(H))(H(H(H(H))))))))	sp|P0C0L4|CO4A_HUMAN/sp|P0C0L5|CO4B_HUMAN	226/226
YKJNSDISSTR	3 5 0 0 1	(N(F)(N(H(N)(H(N)(N(H))))))	sp|P01871|IGHM_HUMAN	46
DLQSLEDILHQVEJK	4 4 1 0 0	(N(N(H(H(N))(H(N(H(A)))))))	sp|P02679|FIBG_HUMAN	78
TPLTAJITK	5 4 0 0 1	(N(F)(N(H(H(N))(H(N(H(H)))))))	sp|P0DOX2|IGA2_HUMAN/sp|P01877|IGHA2_HUMAN	320/205
YKJNSDISSTR	4 5 0 0 1	(N(F)(N(H(N)(H(N))(H(N(H))))))	sp|P01871|IGHM_HUMAN	46
QSVPAHFVALJGSK	6 2 0 0 0	(N(N(H(H)(H(H)(H(H))))))	sp|P06681|CO2_HUMAN	621
FSDGLESJSSTQFEVK	8 2 0 0 0	(N(N(H(H(H(H)))(H(H)(H(H))))))	sp|P0C0L4|CO4A_HUMAN/sp|P0C0L5|CO4B_HUMAN	226/226
NEEYJK	5 4 2 0 1	(N(F)(N(H(H(N(H(A))))(H(N(H(A)))))))	sp|P02763|A1AG1_HUMAN/sp|P19652|A1AG2_HUMAN	56/56
GHVJITR	5 4 1 0 0	(N(N(H(H(N(H)))(H(N(H(A)))))))	sp|P00734|THRB_HUMAN	121
FSDGLESJSSTQFEVK	8 2 0 0 0	(N(N(H(H)(H(H)(H(H(H(H))))))))	sp|P0C0L4|CO4A_HUMAN/sp|P0C0L5|CO4B_HUMAN	226/226
YKJNSDISSTR	5 5 1 0 1	(N(F)(N(H(N)(H(N(H)))(H(N(H(A)))))))	sp|P01871|IGHM_HUMAN	46
YKJNSDISSTR	6 3 1 0 0	(N(N(H(H(H)(H))(H(N(H(A)))))))	sp|P01871|IGHM_HUMAN	46
LSLHRPALEDLLLGSEAJLTCTLTGLR	5 4 0 0 0	(N(N(H(H)(N)(H(H)(H(N))))))	sp|P01876|IGHA1_HUMAN/sp|P0DOX2|IGA2_HUMAN/sp|P01877|IGHA2_HUMAN	144/246/131
JYTLTGR	5 4 1 0 1	(N(F)(N(H(H(N(H)))(H(N(H(A)))))))	sp|P10643|CO7_HUMAN	754
EJGTISR	5 4 2 0 0	(N(N(H(H(N(H(A))))(H(N(H(A)))))))	sp|P02763|A1AG1_HUMAN	103
EEQYJSTYR	4 4 0 0 1	(N(F)(N(H(H(H))(H(N)(N)))))	sp|P0DOX5|IGG1_HUMAN/sp|P01857|IGHG1_HUMAN	299/180
FSDGLESJSSTQFEVKK	9 2 0 0 0	(N(N(H(H(H))(H(H(H))(H(H(H)))))))	sp|P0C0L4|CO4A_HUMAN/sp|P0C0L5|CO4B_HUMAN	226/226
YKJNSDISSTR	5 3 1 0 1	(N(F)(N(H(H(H))(H(N(H(A)))))))	sp|P01871|IGHM_HUMAN	46
EEQFJSTFR	3 5 0 0 1	(N(F)(N(H(N)(H(N)(N(H))))))	sp|P01859|IGHG2_HUMAN	176
EEQFJSTFR	4 3 0 0 1	(N(F)(N(H(H(H))(H(N)))))	sp|P01859|IGHG2_HUMAN	176
FSDGLESJSSTQFEVKK	9 2 0 0 0	(N(N(H(H(H(H(H))))(H(H(H(H)))))))	sp|P0C0L4|CO4A_HUMAN/sp|P0C0L5|CO4B_HUMAN	226/226
GLJVTLSSTGR	5 4 2 0 0	(N(N(H(H(N(H(A))))(H(N(H(A)))))))	sp|P0C0L4|CO4A_HUMAN/sp|P0C0L5|CO4B_HUMAN	1328/1328
DTFVJASR	5 4 1 0 1	(N(F)(N(H(H(N(H)))(H(N(H(A)))))))	sp|P05155|IC1_HUMAN	238
JGSLFAFR	5 4 2 0 0	(N(N(H(H(N(H(A))))(H(N(H(A)))))))	sp|P04004|VTNC_HUMAN	169
LAGKPTHVJVSVVMAEVDGTCY	5 4 2 0 1	(N(N(H(H(N(H(A))))(H(N(F)(H(A)))))))	sp|P01876|IGHA1_HUMAN	340
EEQFJSTFR	4 4 0 0 1	(N(F)(N(H(H(H))(H(N)(N)))))	sp|P01859|IGHG2_HUMAN	176
EEQFJSTFR	3 4 0 0 1	(N(F)(N(H(H)(H(N)(N)))))	sp|P01859|IGHG2_HUMAN	176
VYKPSAGJNSLYR	5 4 2 0 0	(N(N(H(H(N(H(A))))(H(N(H(A)))))))	sp|P02749|APOH_HUMAN	162
FSDGLESJSSTQFEVKK	9 2 0 0 0	(N(N(H(H(H)(H))(H(H(H(H(H))))))))	sp|P0C0L4|CO4A_HUMAN/sp|P0C0L5|CO4B_HUMAN	226/226
EEQFJSTFR	5 4 0 0 1	(N(F)(N(H(H(N))(H(N(H(H)))))))	sp|P01859|IGHG2_HUMAN	176
NEEYJK	6 5 3 0 1	(N(N(H(H(N(H(A))))(H(N(H(A)))(N(F)(H(A)))))))	sp|P02763|A1AG1_HUMAN/sp|P19652|A1AG2_HUMAN	56/56
EEQFJSTFR	3 4 0 0 1	(N(F)(N(H(H)(N)(H(N)))))	sp|P01859|IGHG2_HUMAN	176
YKJNSDISSTR	5 4 2 0 1	(N(F)(N(H(H(N(H(A))))(H(N(H(A)))))))	sp|P01871|IGHM_HUMAN	46
JYTLTGR	5 4 2 0 1	(N(F)(N(H(H(N(H(A))))(H(N(H(A)))))))	sp|P10643|CO7_HUMAN	754
YKJNSDISSTR	5 4 0 0 1	(N(F)(N(H(N)(H(H))(H(N(H))))))	sp|P01871|IGHM_HUMAN	46

## Sheet: Supplementary Table 4
Supplementary Table 4: Glycopeptides with non-canonical NXV motif, where X is any amino acid were also identified from the SEC data and they are presented here. Peptide sequence is provided in the column A, where J is the Aspragine on which the glycan was localized. Column B provides the composition of the glycan at the glycosylation site, where H, N, A, G, F are in sequence and H=Hexose, N=HexNA…
Peptide sequence	Glycan composition (H,N,A,G,F)	Plausible Structure	Proteins (Uniprot accession and Id)	Glycosyaltion Site
DILLLGNJYVIHRJSCEVEISRVAJR	5 2 0 0 0	(N(N(H(H)(H(H(H))))))	sp|Q14541|HNF4G_HUMAN	217
DILLLGNJYVIHRJSCEVEISRVAJR	6 2 0 0 0	(N(N(H(H)(H(H)(H(H))))))	sp|Q14541|HNF4G_HUMAN	217
DILLLGNJYVIHRJSCEVEISRVAJR	6 2 0 0 0	(N(N(H(H(H))(H(H)(H)))))	sp|Q14541|HNF4G_HUMAN	217
EDYLDVYVFGVGPLVJQVNINALASK	5 2 0 0 0	(N(N(H(H)(H(H)(H)))))	sp|P00751|CFAB_HUMAN	435
EDYLDVYVFGVGPLVJQVNINALASK	5 4 2 0 0	(N(N(H(H)(H(N(H(A)))(N(H(A)))))))	sp|P00751|CFAB_HUMAN	435
EGLNKHVSSLWJCVR	5 4 2 0 0	(N(N(H(H(N(H(A))))(H(N(H(A)))))))	sp|Q9BXX0|EMIL2_HUMAN	739
IFFHLJAVALGDGGHYTCR	5 4 2 0 0	(N(N(H(H(N(H(A))))(H(N(H(A)))))))	sp|P04217|A1BG_HUMAN	267
JGVAQEPVHLDSPAIK	5 4 2 0 0	(N(N(H(H(N(H(A))))(H(N(H(A)))))))	sp|P04217|A1BG_HUMAN	63
JSVLJSSTAEHSSPYSEDPIEDPLQPDVTGIR	5 4 2 0 0	(N(N(H(H(N(H(A))))(H(N(H(A)))))))	sp|P12259|FA5_HUMAN	817
JVVFVIDK	6 2 0 0 0	(N(N(H(H(H(H(H(H))))))))	sp|Q14624|ITIH4_HUMAN	274
JVVFVIDK	6 2 0 0 0	(N(N(H(H)(H(H)(H)(H)))))	sp|Q14624|ITIH4_HUMAN	274
KAEDLSSLJGQLQSEVTLLRJEVAQLK	6 5 1 0 0	(N(N(H(N)(H(N(H(H))))(H(N(H(A)))))))	sp|P15336|ATF2_HUMAN	403
KQLAMVMRYGVJGVGKILK	5 4 2 0 0	(N(N(H(H(N(H(A))))(H(N(H(A)))))))	sp|P07093|GDN_HUMAN	86
LVJEVTEFAK	5 4 2 0 0	(N(N(H(H(N(H(A))))(H(N(H(A)))))))	sp|P02768|ALBU_HUMAN	68
NPPMGGJVVIFDTVITNQEEPYQJHSGR	5 4 1 0 1	(N(F)(N(H(H(N(H)))(H(N(H(A)))))))	sp|P02745|C1QA_HUMAN	129
QVETIRJLVDSYMSIIJK	3 3 0 0 0	(N(N(H(H)(H(N)))))	sp|Q9UQ16|DYN3_HUMAN	664
QVETIRJLVDSYMSIIJK	4 3 0 0 0	(N(N(H(H)(H(N(H))))))	sp|Q9UQ16|DYN3_HUMAN	664
RNPPMGGJVVIFDTVITNQEEPYQJHSGR	5 4 2 0 1	(N(F)(N(H(H(N(H(A))))(H(N(H(A)))))))	sp|P02745|C1QA_HUMAN	129
TEVSSJHVLIYLDKVSJQTLSLFFTVLQDVPVR	5 4 2 0 0	(N(N(H(H(N(H(A))))(H(N(H(A)))))))	sp|P01023|A2MG_HUMAN	1413
VNQJLVYESGSLJFSKLEIQSQVDSQHVGHSVLTAK	5 4 2 0 0	(N(N(H(H(N(H(A))))(H(N(H(A)))))))	sp|P04114|APOB_HUMAN	2973
